# Supplementary material for: Ortho-Methylation of pyridine via intramolecular N-methyl migration
Source: Royal Society of Chemistry journal article supplement (doi:10.1039/d5sc10082h), 2026-04-17

## Supplementary Information

### Ortho-Methylation of Pyridine *via* Intramolecular *N*-methyl

#### Migration

Shunyao Huang,<sup>1</sup> † Shun Li,<sup>2</sup> † Mingyuan Li,<sup>1</sup> Cong Lv,<sup>1</sup> Shenxiang Wang,<sup>1</sup> Weichao  
Xue,<sup>1</sup> Jiaqi Xu,<sup>1</sup> Xueli Zheng,<sup>1</sup> Ruixiang Li,<sup>1</sup> Hua Chen,<sup>1</sup> \* Haiyan Fu<sup>1</sup> \*

<sup>1</sup>Key Laboratory of Green Chemistry & Technology, Ministry of Education, College of  
Chemistry, Sichuan University, Chengdu, Sichuan 610064, <sup>2</sup>College of New Energy  
Materials and Chemistry, Le shan Normal University, Leshan, Sichuan 614000

\*Corresponding authors: scufhy@scu.edu.cn; scuhchen@scu.edu.cn

## Table of Contents

|                                                                                                   |    |
|---------------------------------------------------------------------------------------------------|----|
| 1. General Information.....                                                                       | 3  |
| 2. Experimental Procedure.....                                                                    | 4  |
| 2.1 General procedure for synthesis of <i>N</i> -alkylpyridinium salts <b>1a-12a, 15a-38a</b> ... | 4  |
| 2.2 Synthesis of <i>N</i> -alkylpyridinium salts <b>13a - 14a, 39a - 43a</b> .....                | 4  |
| 2.3 Procedure for synthesis of <b>1a-D4</b> .....                                                 | 10 |
| 2.4 General procedure for the synthesis of <b>1 - 44</b> .....                                    | 10 |
| 2.5 Optimization results of the reaction conditions.....                                          | 12 |
| 2.6 Scale-up Reaction.....                                                                        | 19 |
| 2.7 Mechanistic Study .....                                                                       | 20 |
| 3. Characterization Data.....                                                                     | 30 |
| 4. References .....                                                                               | 62 |
| 5. NMR spectra .....                                                                              | 64 |

## 1. General Information

$^1\text{H}$  NMR spectra were recorded on Bruker 400 MHz spectrometer and the chemical shifts were reported in parts per million ( $\delta$ ) relative to internal standard TMS (0 ppm) for  $\text{CDCl}_3$ . The peak patterns were indicated as follows: s, singlet; d, doublet; dd, doublet of doublet; t, triplet; m, multiplet; q, quartet. The coupling constants,  $J$ , were reported in Hertz (Hz).  $^{13}\text{C}$  NMR spectra were obtained at Bruker 101 MHz and referenced to the internal solvent signals (central peak is 77.0 ppm in  $\text{CDCl}_3$ ).  $^{19}\text{F}$  NMR were obtained at Bruker 376 MHz ( $\text{CFCl}_3$  as outside standard and low field is positive). GC-MS analysis was recorded on GCMS-QP2020 of SHIMADZU. High-resolution mass spectra (HRMS) were obtained on an Agilent 6520 Q-TOF LC/MS. X-ray photoelectron spectroscopy (XPS) were obtained at AXIS Supra (Kratos). All reagents were weighed and handled in air at room temperature. All solvents, reagents, and deuterated solvents were purchased from Aladdin, Aldrich, Adamas, and TCI without further purification.

## 2. Experimental Procedure

### 2.1 General procedure for synthesis of *N*-alkylpyridinium salts 1a-12a, 15a-38a

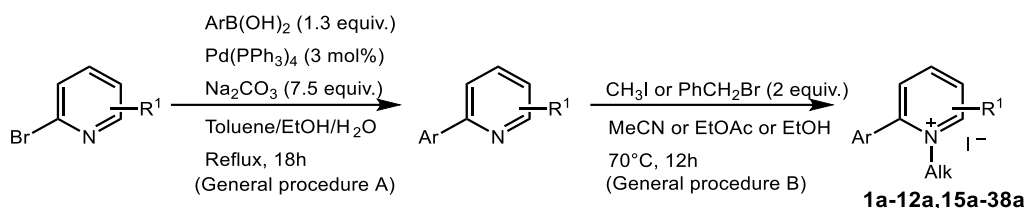

**General Procedure A:** To an oven-dried 100 mL flask, equipped with a magnetic stirrer, was charged with 2-bromopyridine (0.95 mL, 10.0 mmol), substituted phenylboronic acid (13.0 mmol, 1.3 equiv.), Pd (PPh<sub>3</sub>)<sub>4</sub> (0.35 g, 0.3 mmol, 3 mol%), and Na<sub>2</sub>CO<sub>3</sub> (7.95 g, 75.0 mmol, 7.5 equiv.). The system was then purged with nitrogen through three cycles of evacuation and backfilling using a balloon. Subsequently, toluene (35.0 mL), ethanol (7.5 mL), and water (35.0 mL) were added to the flask. The reaction mixture was heated at 110 °C for 18 hours. Upon completion of the reaction, the mixture was allowed to cool, and added aqueous NH<sub>4</sub>Cl (30 mL), followed by filtration and extraction with ethyl acetate (3 x 30 mL). The combined organic extracts were then dried over anhydrous magnesium sulfate (MgSO<sub>4</sub>), filtered, and concentrated under reduced pressure. The residue was purified by silica gel column chromatography (petroleum ether/ethyl acetate, 20:1 to 5:1), to yield the desired 2-arylpyridine product<sup>[1]</sup>.

**General Procedure B:** To an oven-dried 25 mL flask, equipped with a magnetic stirrer, was charged with 2-arylpyridine (5.0 mmol), methyl iodide or benzyl bromide (10.0 mmol, 2 equiv.), and acetonitrile or ethyl acetate or ethyl alcohol (5.0 mL). The reaction mixture was heated at 70 °C for 12 hours. Then it was cooled to room temperature, and the solvent was removed under reduced pressure to obtain the crude product, which was recrystallized in MeCN/EtOAc co-solvent to afford a pure product<sup>[2]</sup>.

### 2.2 Synthesis of *N*-alkylpyridinium salts 13a - 14a, 39a - 43a

#### Synthesis of compound 13a

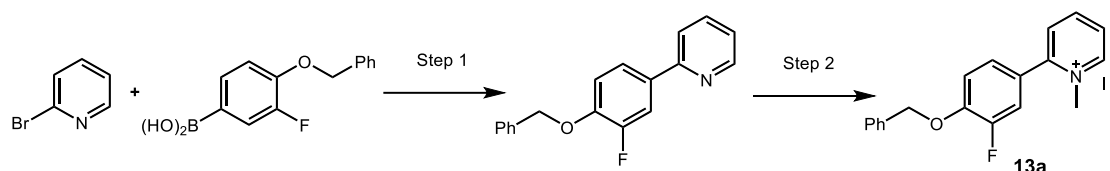

**Step 1:** According to **General procedure A**, to an oven-dried 100 mL flask with a magnetic stirring bar was charged with 2-bromopyridine (0.31 mL, 3.2 mmol, 1.0 equiv.), (4-(benzyloxy)-3-fluorophenyl) boronic acid (1.00 g, 4.1 mmol, 1.3 equiv.), Pd(PPh<sub>3</sub>)<sub>4</sub> (0.19 g, 0.16 mmol, 5 mol%) and Na<sub>2</sub>CO<sub>3</sub> (2.50 g, 24.0 mmol, 7.5 equiv.), and then subjected to three cycles of vacuum/nitrogen backfill. Subsequently, toluene (12.0 mL), ethanol (2.5 mL), and water (12.0 mL) were added to the flask, and the mixture was heated at 110 °C for 18 hours. Upon completion of the reaction, the mixture was allowed to cool, and added aqueous NH<sub>4</sub>Cl (15 mL), followed by filtration and extraction with ethyl acetate (3 x 15 mL). The combined organic extracts were then dried over anhydrous magnesium sulfate (MgSO<sub>4</sub>), filtered, and concentrated under reduced pressure. The residue was purified by silica gel column chromatography<sup>[1]</sup>. (589 mg, 66% yield)

**Step 2:** The crude product obtained from **step 1** was reacted according to **General procedure B** to obtain the *N*-alkylpyridinium salt **13a**.

### Synthesis of compound 14a

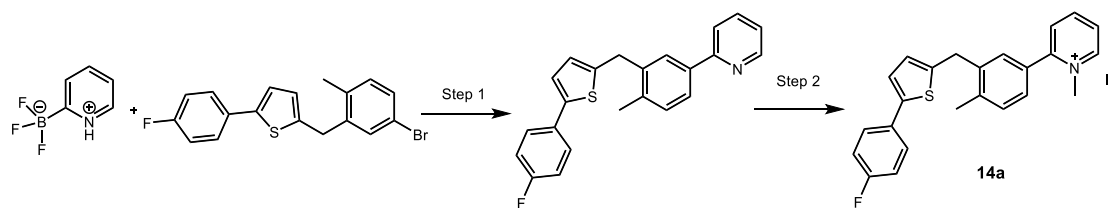

**Step 1:** To an oven-dried 100 mL flask, equipped with a magnetic stirrer, was charged with Pd(Amphos)Cl<sub>2</sub> (0.20 g, 7.5 mol%) and ZnO (0.62 g, 7.6 mmol, 2.0 equiv.). Subsequently, a mixture of 2-pyridylboronic acid (0.93 g, 7.6 mmol, 2.0 equiv.) and HBF<sub>4</sub>·OEt<sub>2</sub> (1.00 mL, 7.6 mmol, 2.0 equiv.) in MeOH (19 mL, c = 0.4 M) was added into the flask, followed by 2-(5-bromo-2-methylbenzyl)-5-(4-fluorophenyl)thiophene (1.37 g, 3.8 mmol, 1.0 equiv.). The reaction mixture was stirred vigorously at 70 °C for

3 h in an oil bath. After that, the reaction vessel was opened to air, and the residue was purified by silica gel column chromatography<sup>[3]</sup>. (482 mg, 35% yield)

**Step 2:** The crude product obtained from **step 1** was reacted according to **General procedure B** to obtain the *N*-alkylpyridinium salt **14a**.

### Synthesis of compound 39a

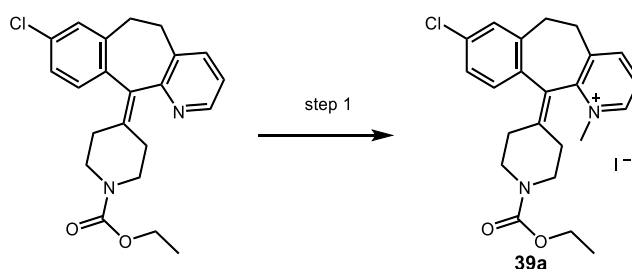

According to **General procedure B**, loratadine (1.91 g, 5.0 mmol) and methyl iodide (0.62 mL, 10.0 mmol, 2.0 equiv.) were reacted in ethyl alcohol (5.0 mL) at 70 °C for 12 hours. The mixture was allowed to cool to room temperature, and the solvent was removed under reduced pressure to obtain the crude product, which was recrystallized in MeCN/EtOAc co-solvent to afford a pure product **39a**.

### Synthesis of compound 40a

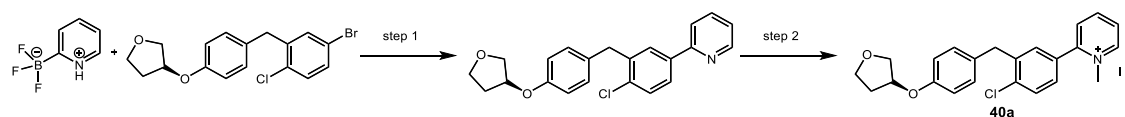

**Step 1:** To an oven-dried 100 mL flask, equipped with a magnetic stirrer, was charged with Pd(Amphos)Cl<sub>2</sub> (0.27 g, 7.5 mol%) and ZnO (1.23 g, 10.0 mmol, 2.0 equiv.). Subsequently, a mixture of 2-pyridylboronic acid (1.23 g, 10.0 mmol, 2.0 equiv.) and HBF<sub>4</sub>·OEt<sub>2</sub> (1.36 mL, 10.0 mmol, 2.0 equiv.) in MeOH (25 mL, c = 0.4 M) was added into the flask, followed by (1S,2R,5S)-2-isopropyl-5-methylcyclohexyl 3-bromobenzoate (1.84 g, 5.0 mmol, 1.0 equiv.). The reaction mixture was stirred vigorously at 70 °C for 3 h in an oil bath. After that, the reaction vessel was opened to air, and the residue was purified by silica gel column chromatography<sup>[3]</sup>. (1.23 g, 68% yield)

**Step 2:** The crude product obtained from **step 1** was reacted according to **General procedure B** to obtain the *N*-alkylpyridinium salt **40a**.

### Synthesis of compound **41a**<sup>[5]</sup>

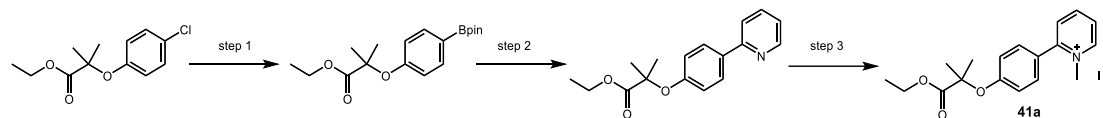

**Step 1:** To an oven-dried 100 mL flask with a magnetic stirring bar was charged with clofibrate (2.40 g, 10.0 mmol, 1.0 equiv.), Pd<sub>2</sub>dba<sub>3</sub> (0.092 g, 1 mol%), Xphos (0.19 g, 4 mol%), B<sub>2</sub>Pin<sub>2</sub> (2.92 g, 11.5 mmol, 1.15 equiv.) and KOAc (2.90 g, 30.0 mmol, 3.0 equiv.) and then subjected to three cycles of vacuum/nitrogen backfill. Subsequently, dry dioxane (47 mL) was added to the flask, and the mixture was heated at 110 °C for 12 hours. Upon completion of the reaction, the mixture was allowed to cool, and added brine (30 mL), followed by filtration and extraction with ethyl acetate (3 x 15 mL). The combined organic extracts were then dried over anhydrous magnesium sulfate (MgSO<sub>4</sub>), filtered, and concentrated under reduced pressure. The residue was purified by silica gel column chromatography. (3.13 g, 94% yield)

**Step 2:** To an oven-dried 100 mL flask with a magnetic stirring bar was charged with pinacol borate (3.13 g, 9.4 mmol, 1.0 equiv.), Pd(PPh<sub>3</sub>)<sub>4</sub> (0.33 g, 3 mol%), 2-bromopyridine (1.10 mL, 11.3 mmol, 1.2 equiv.) and Na<sub>2</sub>CO<sub>3</sub> (3.00 g, 28.0 mmol, 3.0 equiv.) and then subjected to three cycles of vacuum/nitrogen backfill. Subsequently, toluene (50 mL) and water (50 mL) were added to the flask, and the mixture was heated at 110 °C for 12 hours. Upon completion of the reaction, the mixture was allowed to cool, and added aqueous NH<sub>4</sub>Cl (30 mL), followed by filtration and extraction with ethyl acetate (3 x 30 mL). The combined organic extracts were then dried over anhydrous magnesium sulfate (MgSO<sub>4</sub>), filtered, and concentrated under reduced pressure. The residue was purified by silica gel column chromatography. (1.25 g, 47% yield)

**Step 3:** The crude product obtained from **step 2** was reacted according to **General procedure B** to obtain the *N*-alkylpyridinium salt **41a**.

### Synthesis of compound 42a

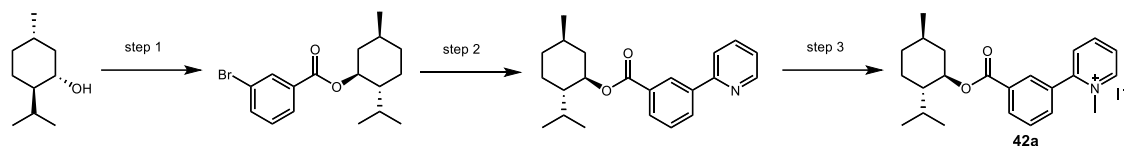

**Step 1:** To an oven-dried 50 mL flask, equipped with a magnetic stirrer, was charged with 3-bromobenzoic acid (2.00 g, 10.0 mmol, 1.0 equiv.) and (+)-menthol (1.56 g, 10.0 mmol, 1.0 equiv.) in  $\text{CH}_2\text{Cl}_2$  (0.25 M). Subsequently, DCC (2.06 g, 10.0 mmol, 1.0 equiv.), and DMAP (1.22 g, 10.0 mmol, 1.0 equiv.) were added to the flask. The reaction mixture was stirred vigorously at room temperature for 12h. After that, the solution was concentrated under reduced pressure, and the residue was purified by silica gel column chromatography<sup>[4]</sup>. (2.80 g, 83% yield)

**Step 2:** To an oven-dried 100 mL flask, equipped with a magnetic stirrer, was charged with  $\text{Pd}(\text{Amphos})\text{Cl}_2$  (0.27 g, 7.5 mol%) and  $\text{ZnO}$  (1.23 g, 10.0 mmol, 2.0 equiv.). Subsequently, a mixture of 2-pyridylboronic acid (1.23 g, 10.0 mmol, 2.0 equiv.) and  $\text{HBF}_4 \cdot \text{OEt}_2$  (1.36 mL, 10.0 mmol, 2.0 equiv.) in MeOH (25 mL,  $c = 0.4$  M) was added into the flask, followed by (1*S*,2*R*,5*S*)-2-isopropyl-5-methylcyclohexyl 3-bromobenzoate (1.69 g, 5.0 mmol, 1.0 equiv.). The reaction mixture was stirred vigorously at 70 °C for 3 h in an oil bath. After that, the reaction vessel was opened to air, and the residue was purified by silica gel column chromatography<sup>[3]</sup>. (733 mg, 44% yield)

**Step 3:** The crude product obtained from **step 2** was reacted according to **General procedure B** to obtain the *N*-alkylpyridinium salt **42a**.

### Synthesis of compound 43a<sup>[5]</sup>

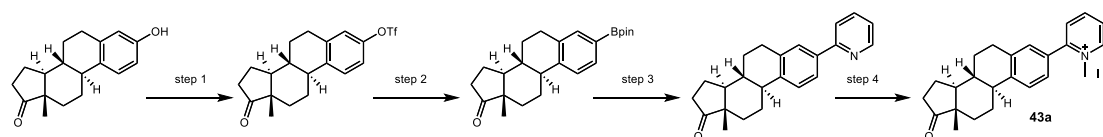

**Step 1:** To an oven-dried 50 mL flask, equipped with a magnetic stirrer, was charged with estrone (2.70 g, 10.0 mmol, 1.0 equiv.) and DIPEA (1.90 mL, 10.0 mmol, 1.0 equiv.) in  $\text{CH}_2\text{Cl}_2$  (40 mL) under  $\text{N}_2$  atmosphere. The reaction mixture was stirred at

0 °C , and  $\text{Tf}_2\text{O}$  was dropwise added into reaction system over 5 min. The reaction mixture was then allowed to warm to room temperature and stirred 30 min. Upon completion of the reaction, water (50 mL) was added to quench the reaction, followed by filtration and extraction with DCM (3 x 30 mL). The combined organic extracts were then dried over anhydrous magnesium sulfate ( $\text{MgSO}_4$ ), filtered, and concentrated under reduced pressure. The residue was purified by silica gel column chromatography. (2.82 g, 70% yield)

**Step 2:** To an oven-dried 100 mL flask with a magnetic stirring bar was charged with trifluoromethanesulfonic (2.82 g, 7.0 mmol, 1.0 equiv.),  $\text{Pd}(\text{dppf})\text{Cl}_2$  (0.51 g, 10 mol%),  $\text{B}_2\text{Pin}_2$  (3.56 g, 14.0 mmol, 2.0 equiv.) and KOAc (2.06 g, 21.0 mmol, 3.0 equiv.) and then subjected to three cycles of vacuum/nitrogen backfill. Subsequently, dry dioxane (28 mL) was added to the flask, and the mixture was heated at 110 °C for 12 hours. Upon completion of the reaction, the mixture was allowed to cool, and added brine (30 mL), followed by filtration and extraction with ethyl acetate (3 x 15 mL). The combined organic extracts were then dried over anhydrous magnesium sulfate ( $\text{MgSO}_4$ ), filtered, and concentrated under reduced pressure. The residue was purified by silica gel column chromatography. (2.43 g, 91% yield)

**Step 3:** To an oven-dried 100 mL flask with a magnetic stirring bar was charged with pinacol borate (2.43 g, 6.4 mmol, 1.0 equiv.),  $\text{Pd}(\text{PPh}_3)_4$  (0.22 g, 3 mol%), 2-bromopyridine (0.74 mL, 7.7 mmol, 1.2 equiv.) and  $\text{Na}_2\text{CO}_3$  (2.03 g, 19.2 mmol, 3.0 equiv.) and then subjected to three cycles of vacuum/nitrogen backfill. Subsequently, toluene (50 mL) and water (50 mL) were added to the flask, and the mixture was heated at 110 °C for 12 hours. Upon completion of the reaction, the mixture was allowed to cool, and added aqueous  $\text{NH}_4\text{Cl}$  (30 mL), followed by filtration and extraction with ethyl acetate (3 x 30 mL). The combined organic extracts were then dried over anhydrous magnesium sulfate ( $\text{MgSO}_4$ ), filtered, and concentrated under reduced pressure. The residue was purified by silica gel column chromatography. (369 mg, 17% yield)

**Step 4:** The crude product obtained from **step 3** was reacted according to **General procedure B** to obtain the *N*-alkylpyridinium salt **43a**.

### 2.3 Procedure for synthesis of D<sub>4</sub>-1-Methyl-2-phenyl-pyridin-1-ium iodide (**1a-D4**)

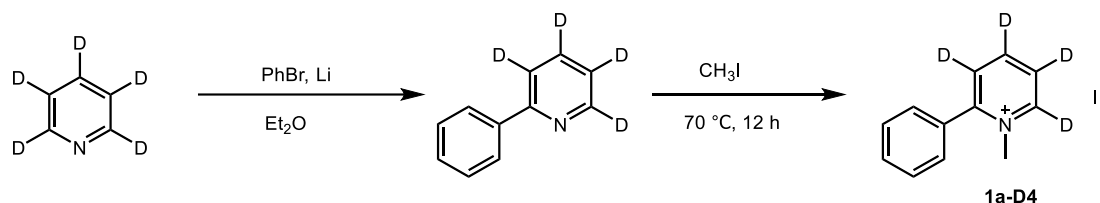

**General procedure C:** The mixture of bromobenzene (2.25 g, 14.3 mmol) and 2 mL anhydrous ether was added gradually to a three-neck flask containing Li (210.0 mg, 30.0 mmol) and 4 mL anhydrous ether. And then the reaction mixture was refluxed for 1.5 h. The mixture of 2 mL anhydrous toluene and pyridine-d<sub>5</sub> (1.34 g, 16.0 mmol) was then added dropwise. The mixture was then stirred for about 50 min at room temperature and refluxed for another 4 h. The reaction mixture was poured cautiously into ice-water, and then acidified with concentrated hydrochloric acid, which was transferred to 250 mL separating funnel and extracted with 50 mL water, the aqueous solution was saturated with sodium hydroxide and extracted with ether. The organic phase was concentrated to give oil crude product, then purified by column chromatography to give pure product as a colorless oil (420.0 mg, 18%). The crude product was reacted according to **General procedure B** to obtain the *N*-alkylpyridinium salt **1a-D4** (445 mg, 57%).

### 2.4 General procedure for the synthesis of **1-44**

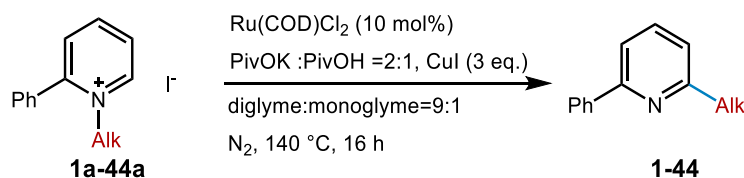

**General procedure D:** An oven-dried 10 mL Schlenk tube equipped with magnetic stirring bar were charged with corresponding *N*-alkylpyridinium salts (0.25 mmol, 1.0 equiv.), Ru(COD)Cl<sub>2</sub> (10 mol%), PivOK (0.5 mmol, 2.0 equiv.), PivOH (0.25 mmol, 1.0

equiv.), CuI (0.75 mmol, 3.0 equiv.), diglyme (0.9 mL) and monoglyme (0.1 mL), and then subjected to three cycles of vacuum/nitrogen backfill. The resulting solution was stirred at 140 °C (heated by heating plate magnetic stirrer) for 16 h. After cooling to room temperature, water (2 mL) was added to quench the reaction, followed by filtration and extraction with EA (3 x 2 mL) and filtered through a short pad of celite. The volatiles were removed under vacuum and the residue was purified by preparative thin layer chromatography (silica gel, petroleum ether/ethyl acetate 30:1 to 5:1) to give pure product.

## 2.5 Optimization results of the reaction conditions

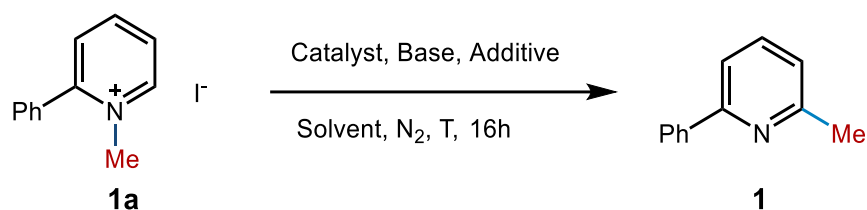

**Table S1. Optimization of Catalyst**

| Entry | Catalyst                                                        | Base  | Additive          | Solvent | Yield |
|-------|-----------------------------------------------------------------|-------|-------------------|---------|-------|
| 1     | Pd(OAc) <sub>2</sub>                                            | PivOK | Cu <sub>2</sub> O | DMA     | n.d.  |
| 2     | Pd(COD)Cl <sub>2</sub>                                          | PivOK | Cu <sub>2</sub> O | DMA     | n.d.  |
| 3     | (PCy) <sub>2</sub> NiCl <sub>2</sub>                            | PivOK | Cu <sub>2</sub> O | DMA     | n.d.  |
| 4     | Ni(acac) <sub>2</sub>                                           | PivOK | Cu <sub>2</sub> O | DMA     | n.d.  |
| 5     | Rh(CO) <sub>2</sub> Cl <sub>2</sub>                             | PivOK | Cu <sub>2</sub> O | DMA     | n.d.  |
| 6     | [(p-cymene)RuCl <sub>2</sub> ] <sub>2</sub>                     | PivOK | Cu <sub>2</sub> O | DMA     | 14    |
| 7     | Tris(2,2'-bipyridine)RuCl <sub>2</sub>                          | PivOK | Cu <sub>2</sub> O | DMA     | n.d.  |
| 8     | Ru(COD)Cl <sub>2</sub>                                          | PivOK | Cu <sub>2</sub> O | DMA     | 15    |
| 9     | RuCl <sub>2</sub> (C <sub>6</sub> H <sub>6</sub> ) <sub>2</sub> | PivOK | Cu <sub>2</sub> O | DMA     | 14    |

<sup>a</sup> Reaction conditions: *N*-alkylpyridinium salt (0.25 mmol), Catalyst (10 mol%), PivOK (0.5 mmol), Cu<sub>2</sub>O (0.5 mmol), DMA (1 mL), 130 °C, 16 h. <sup>b</sup> Isolated yields.

**Table S2. Optimization of Additive A**

| Entry | Additive A                         | Solvent | Base  | Yield (%) |
|-------|------------------------------------|---------|-------|-----------|
| 1     | Cu <sub>2</sub> O                  | DMA     | PivOK | 15        |
| 2     | CuI                                | DMA     | PivOK | 27        |
| 3     | CuBr                               | DMA     | PivOK | 17        |
| 4     | CuCl                               | DMA     | PivOK | 23        |
| 5     | CuCN                               | DMA     | PivOK | n.d.      |
| 6     | CuSCN                              | DMA     | PivOK | n.d.      |
| 7     | Cu <sub>2</sub> S                  | DMA     | PivOK | n.d.      |
| 9     | CH <sub>3</sub> COOCu              | DMA     | PivOK | trace     |
| 10    | CF <sub>3</sub> O <sub>3</sub> SCu | DMA     | PivOK | trace     |
| 11    | -                                  | DMA     | PivOK | n.d.      |

**Table S3. Optimization of Base**

| Entry | Base                            | Solvent | Yield (%) |
|-------|---------------------------------|---------|-----------|
| 1     | PivOK                           | DMA     | 27        |
| 2     | KOH                             | DMA     | trace     |
| 3     | K <sub>2</sub> CO <sub>3</sub>  | DMA     | n.d.      |
| 4     | Li <sub>2</sub> CO <sub>3</sub> | DMA     | trace     |
| 5     | t-BuOK                          | DMA     | trace     |
| 6     | K <sub>3</sub> PO <sub>4</sub>  | DMA     | trace     |
| 7     | NaF                             | DMA     | n.d.      |
| 9     | CH <sub>3</sub> COONa           | DMA     | trace     |
| 10    | NEt <sub>3</sub>                | DMA     | trace     |
| 11    | DBU                             | DMA     | trace     |

<sup>a</sup> Reaction conditions: *N*-alkylpyridinium salt (0.25 mmol), Ru(COD)Cl<sub>2</sub> (10 mol%), Base (0.5 mmol), CuI (0.5 mmol), DMA (1 mL), 130 °C, 16 h. <sup>b</sup> Isolated yields.

**Table S4. Optimization of solvent and additive A**

| Entry | Solvent                | CuI (x equiv.) | Yield (%) |
|-------|------------------------|----------------|-----------|
| 1     | DMA                    | 2.0            | 27        |
| 2     | DMF                    | 2.0            | trace     |
| 3     | DMSO                   | 2.0            | trace     |
| 4     | Monoglyme              | 2.0            | trace     |
| 5     | Trimethyl orthoacetate | 2.0            | 24        |
| 6     | N-Methyl-2-pyrrolidone | 2.0            | 24        |
| 7     | Diglyme                | 0.5            | n.d.      |
| 8     | Diglyme                | 1.0            | n.d.      |
| 9     | Diglyme                | 1.5            | 11        |
| 10    | Diglyme                | 2.0            | 13        |
| 11    | Diglyme                | 3.0            | 28        |

<sup>a</sup> Reaction conditions: *N*-alkylpyridinium salt (0.25 mmol), Ru(COD)Cl<sub>2</sub> (10 mol%), PivOK (0.5 mmol), CuI (x equiv.), Solvent (1 mL), 130 °C, 16 h. <sup>b</sup> Isolated yields.

**Table S5. Optimization of Solvent and temperature.**

| Entry | Solvent A | Solvent B | Ratio | Temperature (°C) | Yield (%) |
|-------|-----------|-----------|-------|------------------|-----------|
| 1     | Diglyme   | -         | -     | 130              | 28        |
| 2     | Diglyme   | DMA       | 5:5   | 130              | 32        |
| 3     | Diglyme   | DMA       | 7:3   | 130              | 37        |
| 4     | Diglyme   | Monoglyme | 5:5   | 130              | 44        |
| 5     | Diglyme   | Monoglyme | 6:4   | 130              | 31        |
| 6     | Diglyme   | Monoglyme | 7:3   | 130              | 46        |
| 7     | Diglyme   | Monoglyme | 8:2   | 130              | 40        |
| 8     | Diglyme   | Monoglyme | 9:1   | 130              | 51        |
| 9     | Diglyme   | Monoglyme | 9:1   | 140              | 53        |

<sup>a</sup> Reaction conditions: *N*-alkylpyridinium salt (0.25 mmol), Ru(COD)Cl<sub>2</sub> (10 mol%), PivOK (0.5 mmol), CuI (3 equiv.), Co-solvent (1 mL), T °C, 16 h, N<sub>2</sub>. <sup>b</sup> Isolated yields.

**Table S6. Optimization of additive B**

| Entry | Base  | x <sub>1</sub> equiv. | Additive B | x <sub>2</sub> equiv. | Yield (%) |
|-------|-------|-----------------------|------------|-----------------------|-----------|
| 1     | PivOK | 2.0                   | -          | -                     | 53        |
| 2     | PivOK | 2.0                   | PivOH      | 0.5                   | 63        |
| 3     | PivOK | 2.0                   | PivOH      | 1.0                   | 87        |
| 4     | PivOK | 2.0                   | PivOH      | 1.6                   | 73        |
| 5     | PivOK | 2.0                   | PivOH      | 2.0                   | 68        |
| 6     | PivOK | 1.0                   | PivOH      | 1.0                   | 50        |

<sup>a</sup> Reaction conditions: *N*-alkylpyridinium salt (0.25 mmol), Ru(COD)Cl<sub>2</sub> (10 mol%), PivOK (x<sub>1</sub> equiv.), CuI (0.75 mmol), Additive B (x<sub>2</sub> equiv.), Co-solvent (1 mL), N<sub>2</sub>, 140 °C, 16 h. <sup>b</sup> Isolated yields.

**Table S7. Optimization of the loading of catalyst**

| Entry | Ru(COD)Cl <sub>2</sub> | PivOK<br>(x <sub>1</sub> eq.) | PivOH<br>(x <sub>2</sub> eq.) | CuI<br>(y eq.) | Solvent<br>(mL) | Yield<br>(%) |
|-------|------------------------|-------------------------------|-------------------------------|----------------|-----------------|--------------|
| 1     | 5                      | 2.0                           | 1.0                           | 3.0            | 1               | 63           |
| 2     | 5                      | 2.0                           | 1.0                           | 2.0            | 1               | 34           |
| 3     | 5                      | 2.0                           | 1.0                           | 1.0            | 1               | trace        |
| 4     | 5                      | 1.0                           | 1.0                           | 3.0            | 1               | 60           |
| 5     | 5                      | 1.0                           | 0.5                           | 3.0            | 1               | 50           |
| 6     | 5                      | 2.0                           | 1.0                           | 3.0            | 0.5             | 60           |

<sup>a</sup> Reaction conditions: *N*-alkylpyridinium salt (0.25 mmol), Ru(COD)Cl<sub>2</sub> (5 mol%), PivOK (x<sub>1</sub> equiv.), CuI (y equiv.), PivOH (x<sub>2</sub> equiv.), Co-solvent (1 mL), N<sub>2</sub>, 140 °C, 24 h. <sup>b</sup> Isolated yields.

**Table S8. The other first-row transition metal salts as potential additives.**

| Entry | Additive                                                | <b>1</b> |
|-------|---------------------------------------------------------|----------|
| 1     | FeSO <sub>4</sub> ·7H <sub>2</sub> O                    | n.d.     |
| 2     | Ni(CH <sub>3</sub> COO) <sub>2</sub> ·4H <sub>2</sub> O | n.d.     |
| 3     | Zn(CH <sub>3</sub> COO) <sub>2</sub> ·2H <sub>2</sub> O | n.d.     |
| 4     | ZnSO <sub>4</sub> ·7H <sub>2</sub> O                    | trace    |

<sup>a</sup> Reaction conditions: *N*-alkylpyridinium salt (0.25 mmol), Ru(COD)Cl<sub>2</sub> (5 mol%), PivOK (2 equiv.), Additive (3 equiv.), PivOH (1 equiv.), Co-solvent (1 mL), N<sub>2</sub>, 140 °C, 24 h. <sup>b</sup> Isolated yields.

## 2.6 Scale-up Reaction

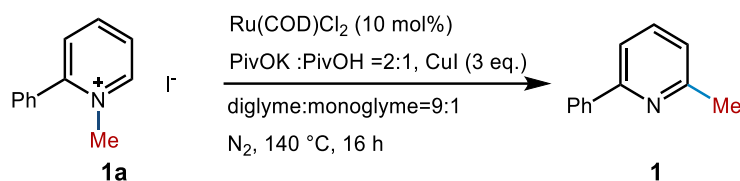

**Experimental step:** An oven-dried 10 mL Schlenk tube equipped with magnetic stirring bar were charged with *N*-methylpyridinium salt (1.5 g, 5.0 mmol, 1.0 equiv.), Ru(COD)Cl<sub>2</sub> (0.14 g, 10 mol%), PivOK (1.4 g, 10.0 mmol, 2.0 equiv.), PivOH (0.57 mL, 5.0 mmol, 1.0 equiv.), CuI (2.86 g, 15.0 mmol, 3.0 equiv.), diglyme (18 mL) and monoglyme (2 mL), and then subjected to three cycles of vacuum/nitrogen backfill. The resulting solution was stirred at 140 °C (heated by heating plate magnetic stirrer) for 16 h. After cooling to room temperature, water (40 mL) was added to quench the reaction, followed by filtration and extraction with EA (3 x 40 mL) and filtered through a short pad of celite. The volatiles were removed under vacuum and the residue was purified by silica gel column chromatography to give pure product (A colorless oil, 658 mg, 78%).

## 2.7 Mechanistic Study

### 2.7.1 Mercury poisoning test

**Experimental step 1:** According to **General procedure D**, 200  $\mu\text{L}$  of mercury was added under the standard conditions. The target product was obtained (78% yield). The result is shown in **Figure S1**. The result clearly shows that the addition of Hg did not inhibit the reaction.

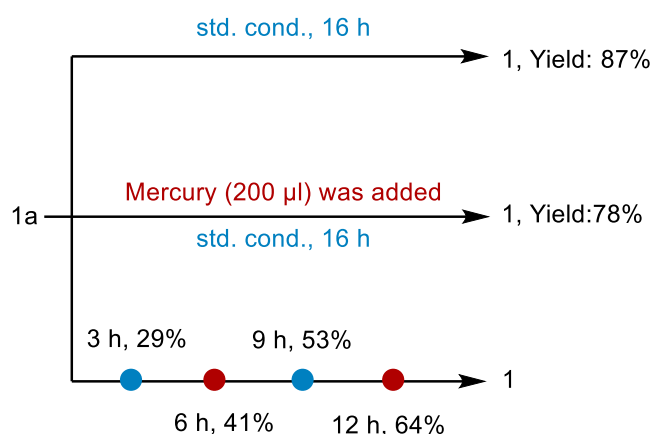

**Figure S1.** Mercury poisoning test.

**Experimental step 2:** According to **General procedure D**, the resulting solution was stirred at 140  $^{\circ}\text{C}$  for 3 h, 6 h, 9 h, and 12 h, with yields of 29%, 41%, 53%, and 64%, respectively. The variation in yield over time is shown in **Figure S2**.

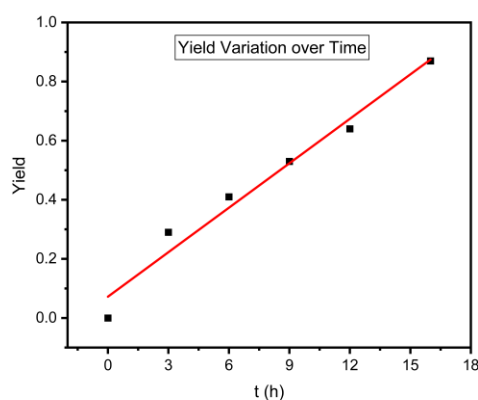

**Figure S2.** The variation in yield over time

These results clearly show that the reaction proceeded via homogeneous catalysis.

## 2.7.2 Radical verification experiment

### 1. Radical trapping experiment

**Experimental step 1:** According to **General procedure D**, radical scavenger (x equiv.) was added under the standard conditions. The result is shown in **Table S9**.

**Table S9.** Radical trapping experiment

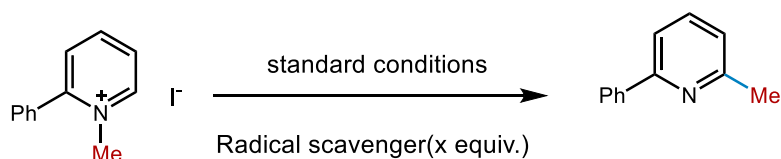

| Entry | Radical scavenger | x equiv. | Yield (%) |
|-------|-------------------|----------|-----------|
| 1     | TEMPO             | 3        | 17        |
| 2     | TEMPO             | 6        | trace     |
| 3     | DMPO              | 2        | trace     |

**Experimental step 2:** According to **General procedure D**, TEMPO (6 equiv.) was added. The resulting solution was stirred at 140 °C for 8 h. After the reaction was completed, the volatiles were measured by HRMS. The phenyl-TEMPO adduct was detected. The result is shown in **Figure S3**.

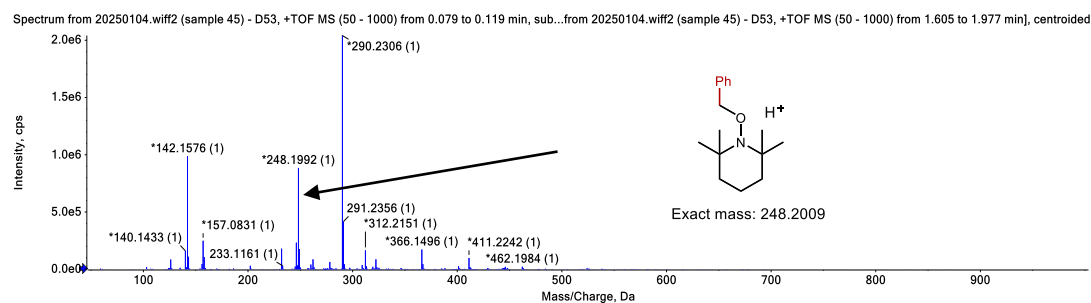

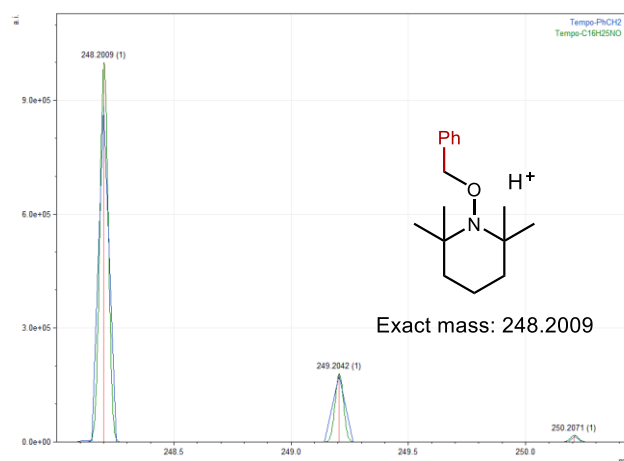

**Figure S3.** Phenyl-TEMPO adduct was detected by HRMS

## 2. Radical clock experiment

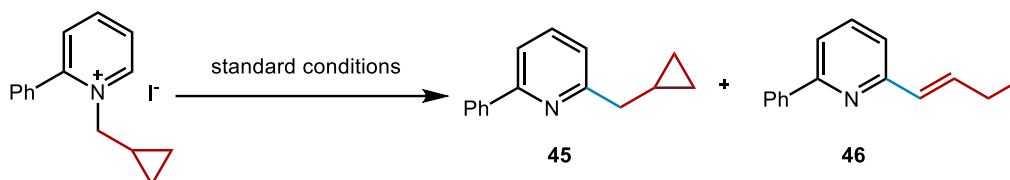

**Experimental step:** According to **General procedure D**, the volatiles were removed under vacuum and the residue was purified by preparative thin layer chromatography (silica gel, petroleum ether/ethyl acetate 30:1) to yield **45** (3 mg, 6%) as a colorless oil and a ring-opening alkylation product **46** (2 mg, 4%).

**2-(cyclopropylmethyl)-6-phenylpyridine (45):**  $^1\text{H}$  NMR (400 MHz, Chloroform-*d*)  $\delta$  8.03 – 7.97 (m, 2H), 7.68 (t,  $J = 7.7$  Hz, 1H), 7.55 (d,  $J = 8.1$  Hz, 1H), 7.50 – 7.43 (m, 2H), 7.43 – 7.37 (m, 1H), 7.24 (d,  $J = 7.6$  Hz, 1H), 2.80 (d,  $J = 7.0$  Hz, 2H), 1.24 – 1.17 (m, 1H), 0.61 – 0.55 (m, 2H), 0.33 – 0.27 (m, 2H).

**(E)-2-(but-1-en-1-yl)-6-phenylpyridine (46):**  $^1\text{H}$  NMR (400 MHz, Chloroform-*d*) 8.08 – 7.98 (m, 2H), 7.67 (t,  $J = 7.8$  Hz, 1H), 7.54 (dd,  $J = 7.8, 1.0$  Hz, 1H), 7.51 – 7.42 (m, 2H), 7.44 – 7.38 (m, 1H), 7.19 (dd,  $J = 7.7, 0.9$  Hz, 1H), 6.94 (dt,  $J = 15.6, 6.5$  Hz, 1H), 6.56 (dt,  $J = 15.6, 1.7$  Hz, 1H), 2.38 – 2.26 (m, 2H), 1.15 (t,  $J = 7.5$  Hz, 3H).

**2-(cyclopropylmethyl)-6-phenylpyridine (45):**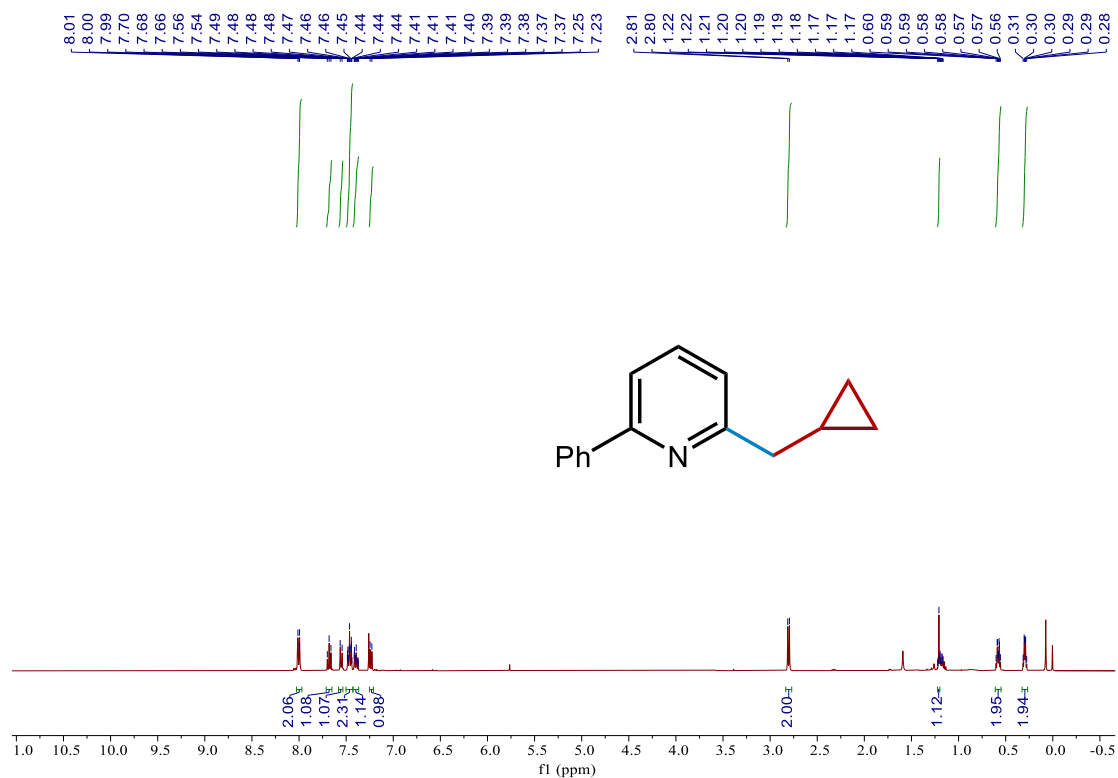**(E)-2-(but-1-en-1-yl)-6-phenylpyridine (46):**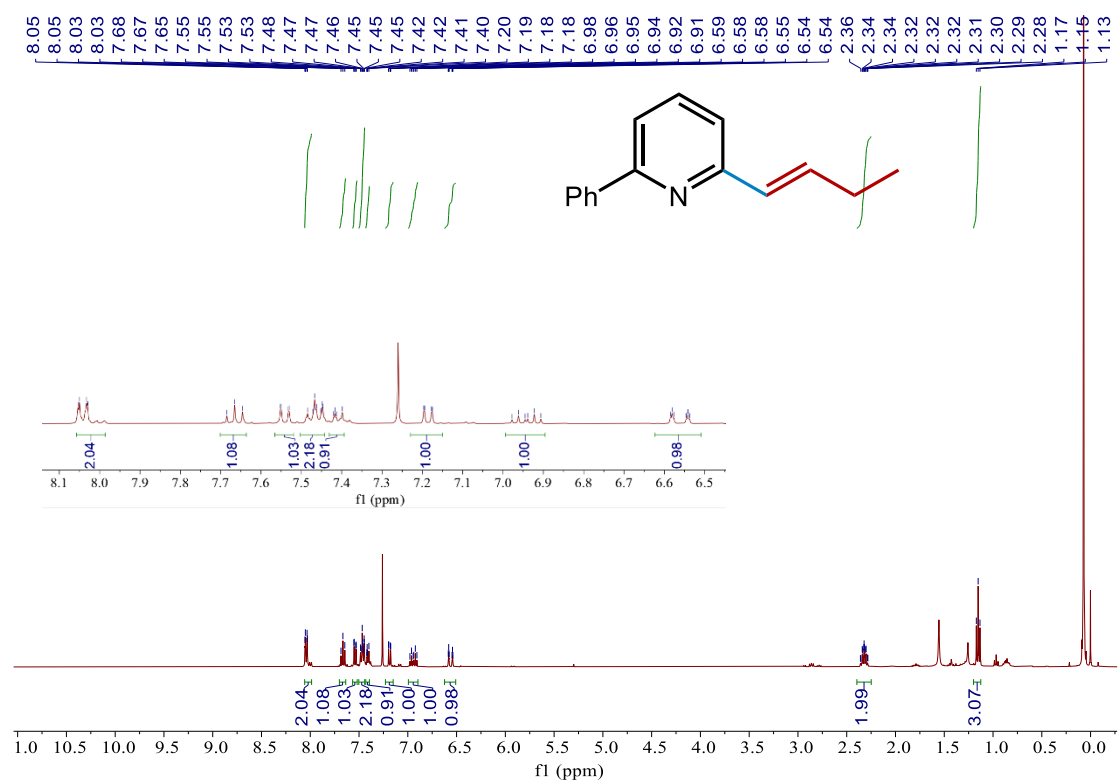

## 2.7.3 KIE experiment

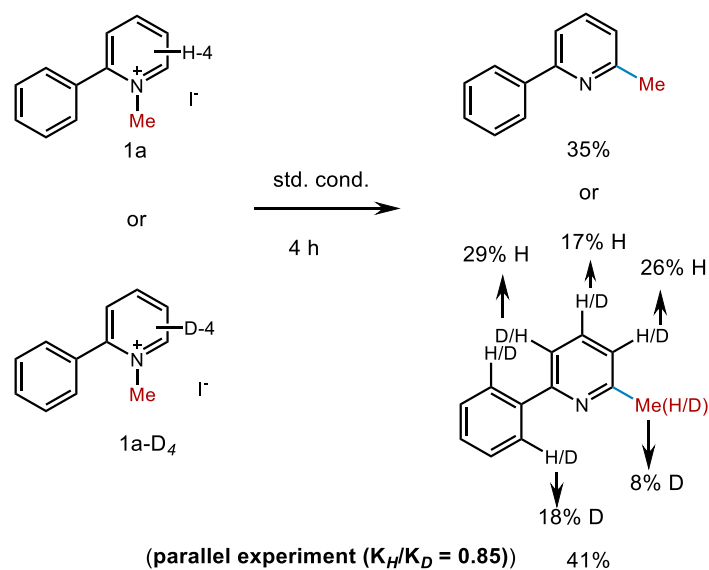

**Experimental step:** According to **General procedure D**, the resulting solution was stirred at 140 °C for 4 h. The isolated yields of **1a/1a-D<sub>4</sub>** were 35% and 41%, respectively. The KIE value was determined to be  $K_H: K_D = 35\%/41\% = 0.85$ . The results were analysis by <sup>1</sup>H NMR.

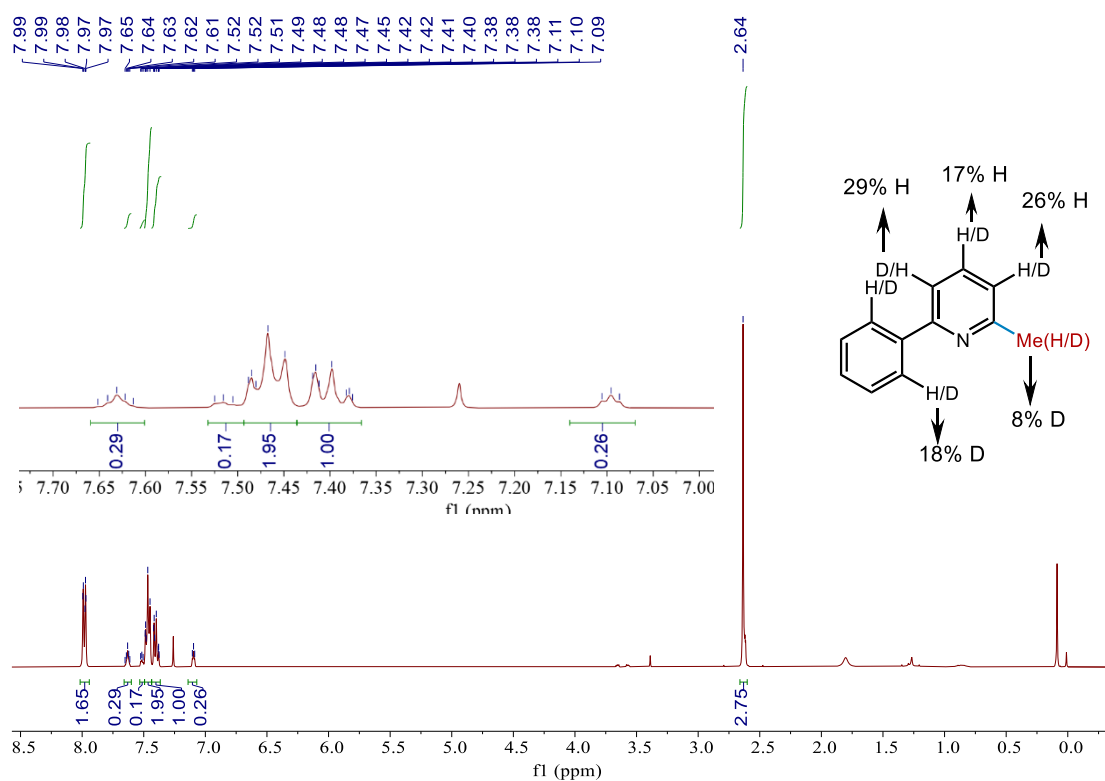

## 2.7.4 Deuterium experiment

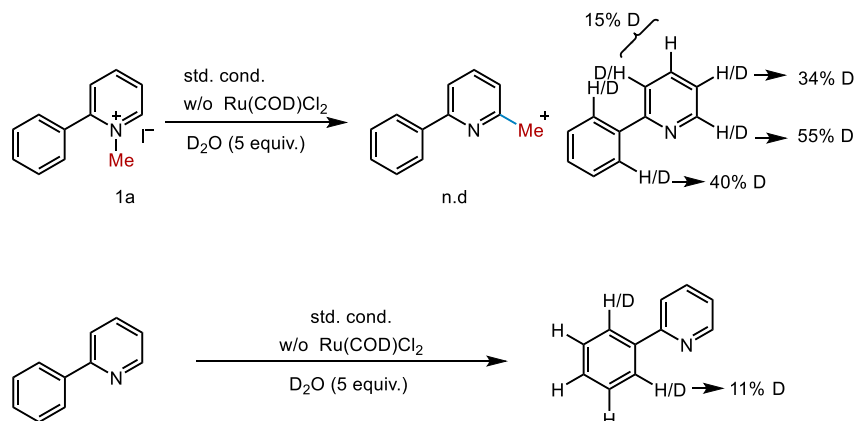

**Experimental step 1:** According to **General procedure D**, the reaction was carried out under standard conditions in the absence of Ru(COD)Cl<sub>2</sub> and with the addition of D<sub>2</sub>O (1.1 mL, 1.25mmol, 5 equiv.). The results were analysis by <sup>1</sup>H NMR.

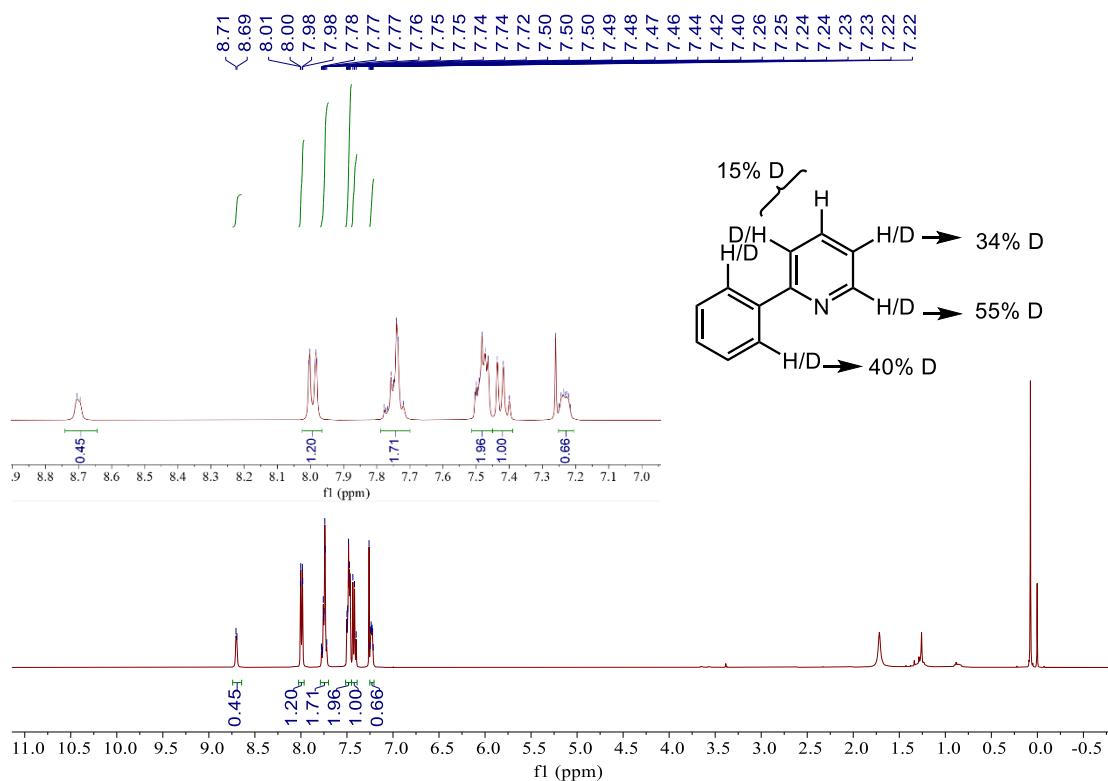

**Experimental step 2:** According to **General procedure D**, 2-phenylpyridine (35.7  $\mu$ L, 0.25 mmol, 1.0 equiv.) was used to replace the *N*-methylpyridinium salt (1a). The reaction was carried out under standard conditions in the absence of Ru(COD)Cl<sub>2</sub> and with the addition of D<sub>2</sub>O (1.13 mL, 1.25mmol, 5 equiv.).

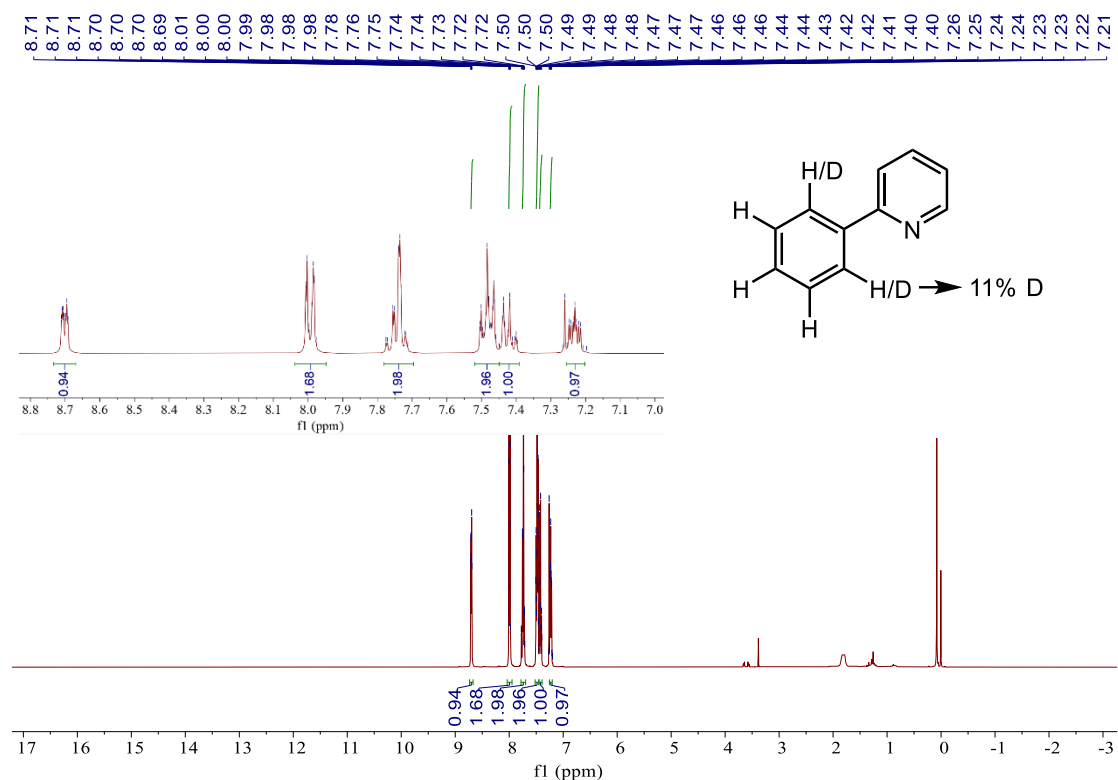

### 2.7.5 Crossover experiment

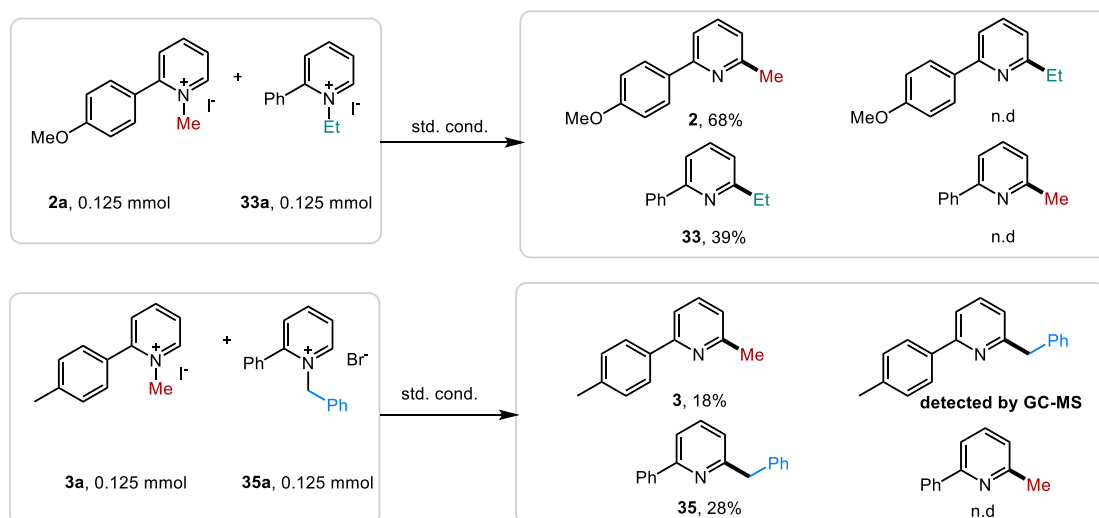

**Experimental step 1:** According to **General procedure D**, an oven-dried 10 mL Schlenk tube equipped with magnetic stirring bar were charged with **2a** (0.125 mmol, 1.0 equiv.) and **33a** (0.125 mmol, 1.0 equiv.), Ru(COD)Cl<sub>2</sub> (7.0 mg, 10 mol%), PivOK (70.0 mg, 0.5 mmol, 2.0 equiv.), PivOH (28.7  $\mu$ L, 0.25 mmol, 1.0 equiv.), CuI (142.8 mg, 0.75 mmol, 3.0 equiv.), diglyme (0.9 mL) and monoglyme (0.1 mL), and then subjected to three cycles of vacuum/nitrogen backfill. The resulting solution was stirred

at 140 °C (heated by heating plate magnetic stirrer) for 16 h. After cooling to room temperature, water (2 mL) was added to quench the reaction, followed by filtration and extraction with EA (3 x 2 mL). No product was detected in the crossover experiment.

**Experimental step 2:** According to **General procedure D**, an oven-dried 10 mL Schlenk tube equipped with magnetic stirring bar were charged with **3a** ( 0.125 mmol, 1.0 equiv.) and **35a** ( 0.125 mmol, 1.0 equiv.), Ru(COD)Cl<sub>2</sub> (7.0 mg, 10 mol%), PivOK (70.0 mg, 0.5 mmol, 2.0 equiv.), PivOH (28.7 μL, 0.25 mmol, 1.0 equiv.), CuI (142.8 mg, 0.75 mmol, 3.0 equiv.), diglyme (0.9 mL) and monoglyme (0.1 mL), and then subjected to three cycles of vacuum/nitrogen backfill. The resulting solution was stirred at 140 °C (heated by heating plate magnetic stirrer) for 16 h. After cooling to room temperature, water (2 mL) was added to quench the reaction, followed by filtration and extraction with EA (3 x 2 mL). Cross-products were detected in the crossover experiment by GC-MS.

## 2.7.6 Proposed mechanism

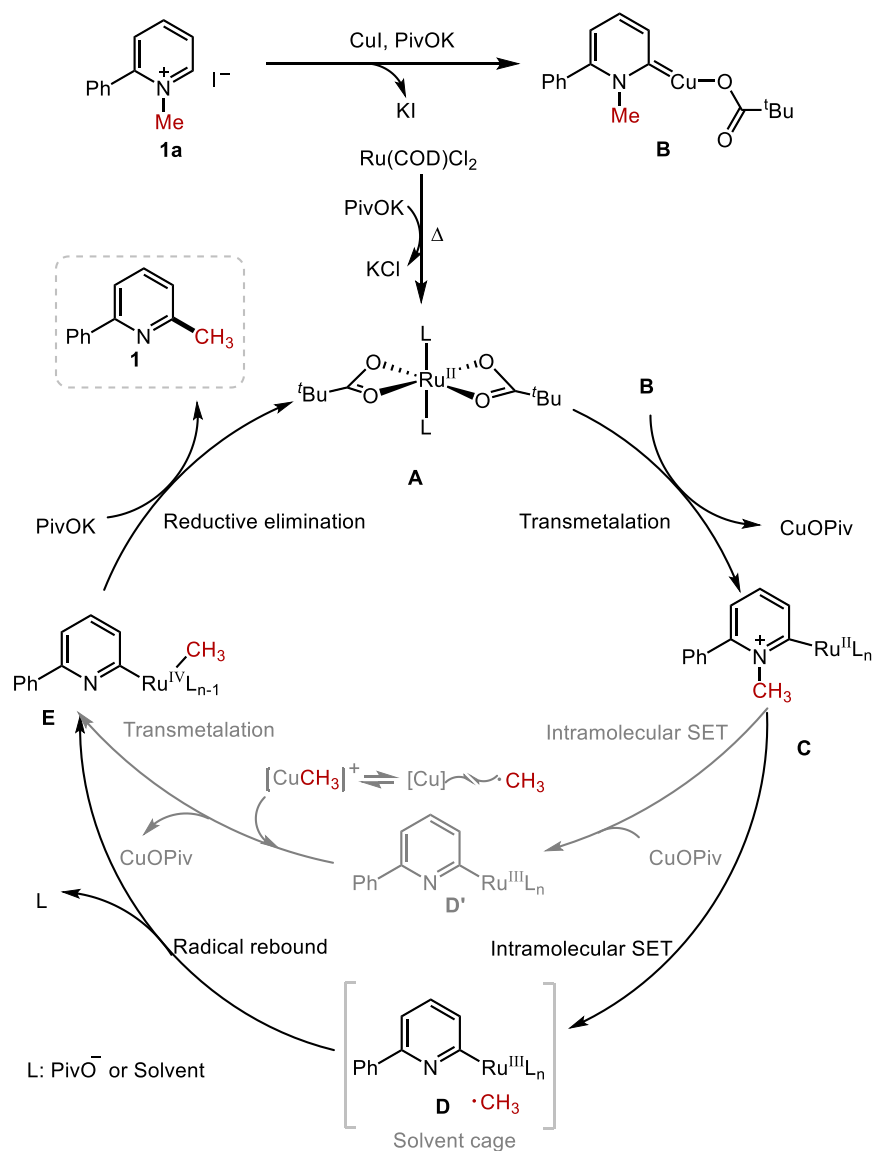

Figure S4. Proposed mechanism

## 2.7.7 X-ray experiment

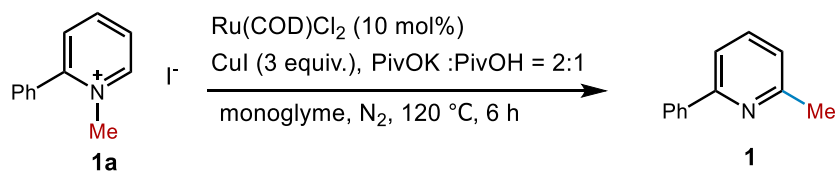

**Experimental step:** According to **General procedure D**, an oven-dried 10 mL Schlenk tube equipped with magnetic stirring bar were charged with corresponding *N*-

alkylpyridinium salts (0.25 mmol, 1.0 equiv.), Ru(COD)Cl<sub>2</sub> (10 mol%), PivOK (0.5 mmol, 2.0 equiv.), PivOH (0.25 mmol, 1.0 equiv.), CuI (0.75 mmol, 3.0 equiv.), monoglyme (0.5 mL), and then subjected to three cycles of vacuum/nitrogen backfill. The resulting solution was stirred at 120 °C (heated by heating plate magnetic stirrer) for 6 h. The reaction was concentrated, then the resulting powder was analyzed by X-ray photoelectron spectroscopy (XPS). The result was shown in **Figure S4**.

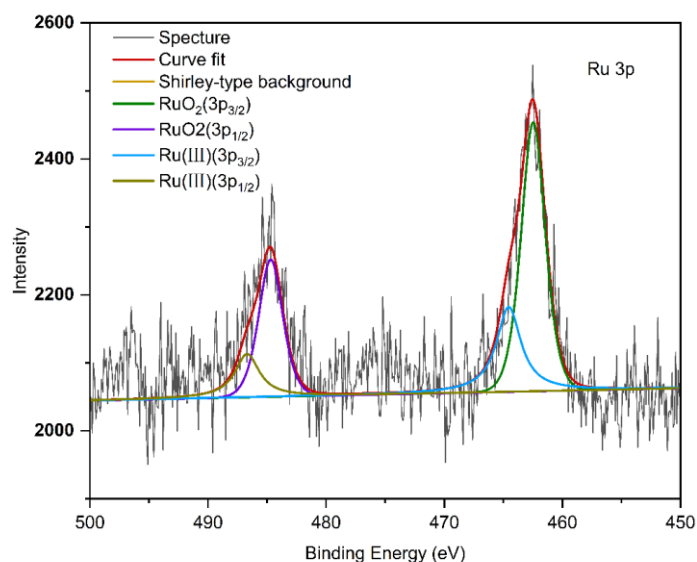

**Figure S5.** Two distinct oxidation states of Ru(III) and Ru(IV)

The Ru 3p spectra indicate the presence of two distinct Ru oxidation states, namely Ru(III) and Ru(IV).

## 3. Characterization Data

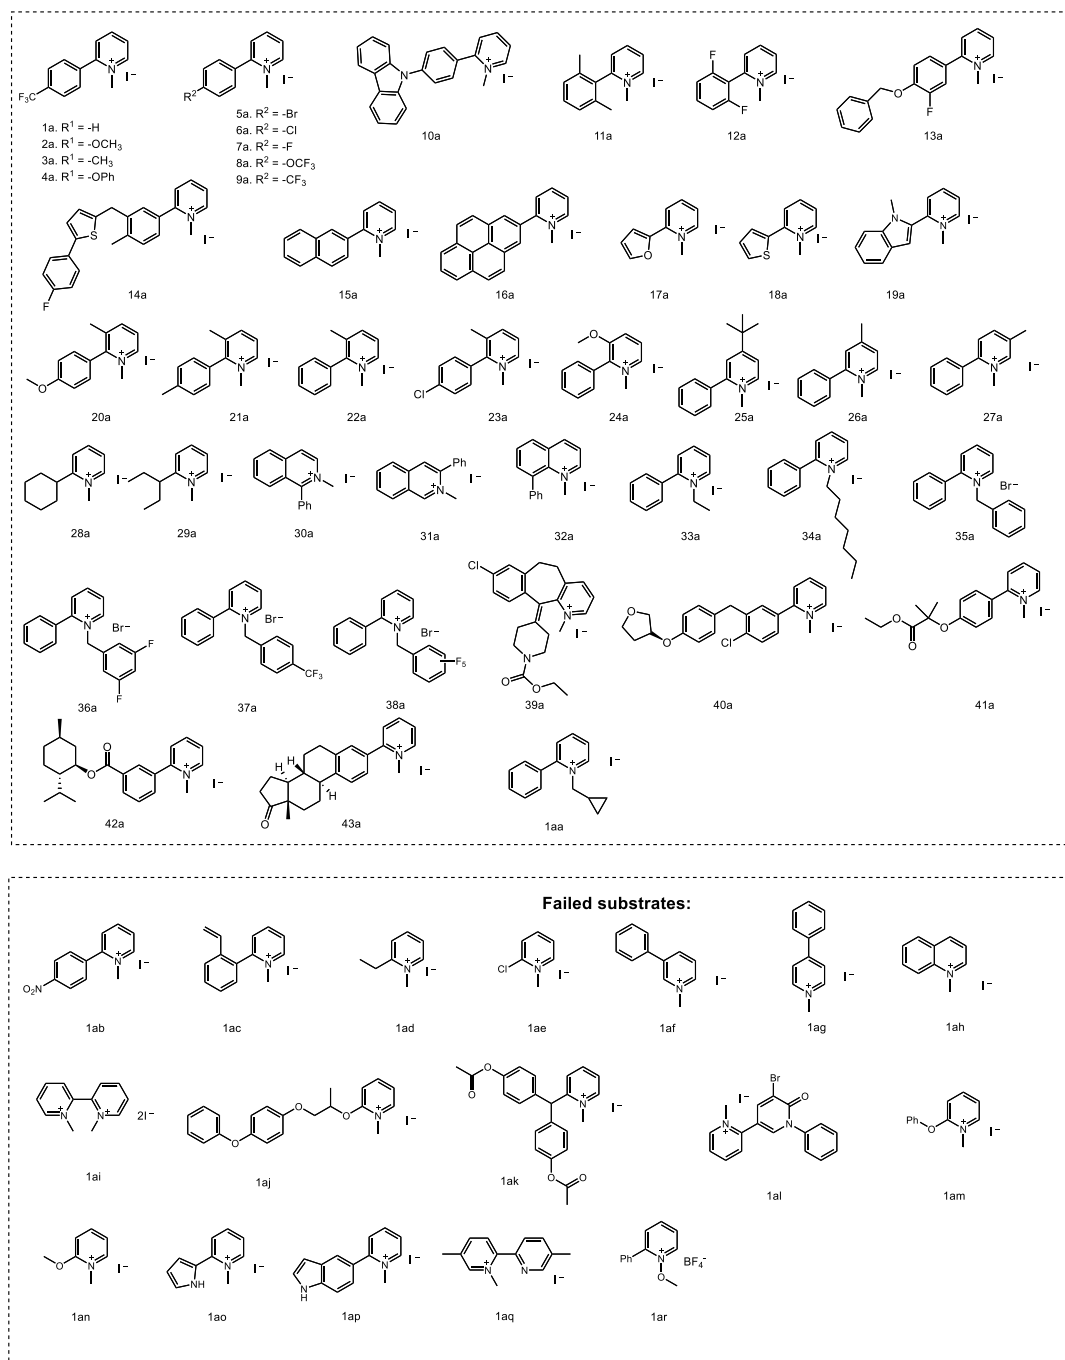

Figure S6: Characterization data for raw materials

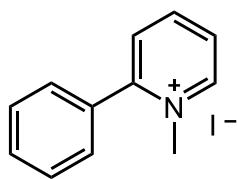

**1-methyl-2-phenylpyridin-1-ium iodide (1a):** The substance was prepared using **General Procedure B**. Yellow solid (1.36 g, 92% yield).  $^1\text{H NMR}$  (400 MHz,  $\text{DMSO-}d_6$ )  $\delta$  9.17 (d,  $J = 6.9$  Hz, 1H), 8.65 (td,  $J = 7.9, 1.5$  Hz, 1H), 8.18 (ddd,  $J = 7.7, 6.2, 1.6$  Hz, 1H), 8.09 (dd,  $J = 7.9, 1.6$  Hz, 1H), 7.73 – 7.64 (m, 5H), 4.13 (s, 3H). Spectra matched literature values.<sup>[6]</sup>

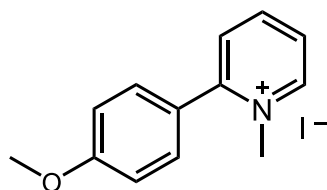

**2-(4-methoxyphenyl)-1-methylpyridin-1-ium iodide (2a):** The substance was prepared using **General Procedure A and B**. Yellow solid (1.31 g, 80% yield).  $^1\text{H NMR}$  (400 MHz,  $\text{DMSO-}d_6$ )  $\delta$  9.11 (d,  $J = 6.3$  Hz, 1H), 8.60 (td,  $J = 7.8, 1.5$  Hz, 1H), 8.11 (ddd,  $J = 7.7, 6.2, 1.6$  Hz, 1H), 8.05 (dd,  $J = 8.0, 1.5$  Hz, 1H), 7.71 – 7.59 (m, 2H), 7.24 – 7.16 (m, 2H), 4.15 (s, 3H), 3.87 (s, 3H). Spectra matched literature values.<sup>[6]</sup>

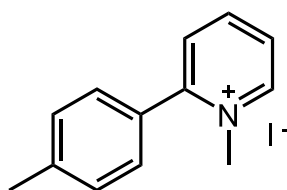

**1-methyl-2-(p-tolyl)pyridin-1-ium iodide (3a):** The substance was prepared using **General Procedure A and B**. Yellow solid (1.23 g, 79% yield).  $^1\text{H NMR}$  (400 MHz,  $\text{DMSO-}d_6$ )  $\delta$  9.14 (d,  $J = 6.3$  Hz, 1H), 8.62 (td,  $J = 7.9, 1.5$  Hz, 1H), 8.14 (ddd,  $J = 7.8, 6.1, 1.5$  Hz, 1H), 8.05 (dd,  $J = 7.9, 1.5$  Hz, 1H), 7.59 (d,  $J = 4.6$  Hz, 2H), 7.47 (d,  $J = 8.0$  Hz, 2H), 4.13 (s, 3H), 2.43 (s, 3H). Spectra matched literature values.<sup>[6]</sup>

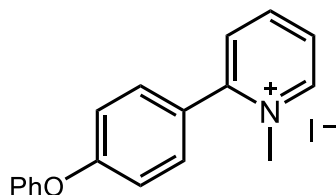

**1-methyl-2-(4-phenoxyphenyl)pyridin-1-ium iodide (4a):** The substance was prepared using **General Procedure A and B**. Yellow solid (1.43 g, 74% yield).  $^1\text{H NMR}$  (400 MHz,  $\text{DMSO-}d_6$ )  $\delta$  9.13 (d,  $J = 6.3$  Hz, 1H), 8.63 (td,  $J = 7.9, 1.4$  Hz, 1H), 8.14 (ddd,  $J = 7.7, 6.2, 1.6$  Hz, 1H), 8.08 (dd,  $J = 8.0, 1.5$  Hz, 1H), 7.74 – 7.68 (m, 2H), 7.53 – 7.45 (m, 2H), 7.30 – 7.23 (m, 1H), 7.23 – 7.13 (m, 4H), 4.16 (s, 3H).  $^{13}\text{C}$   $\{^1\text{H}\}$  NMR (101 MHz,  $\text{DMSO-}d_6$ )  $\delta$  159.8, 155.6, 155.1, 147.2, 145.8, 132.0, 130.9, 130.4, 126.9, 126.6, 125.2, 120.4, 118.4, 47.6. **HRMS (ESI):** call for  $\text{C}_{18}\text{H}_{16}\text{NO}[\text{M-I}]^+$ : 262.1226; Found: 262.1217.

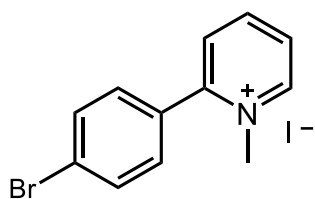**2-(4-bromophenyl)-1-methylpyridin-1-ium iodide (5a):**

The substance was prepared using **General Procedure A and B**. Yellow solid (1.42 g, 76% yield).  $^1\text{H NMR}$  (400 MHz,  $\text{DMSO-}d_6$ )  $\delta$  9.16 (d,  $J = 6.1$  Hz, 1H), 8.65 (td,  $J = 7.9, 1.4$  Hz, 1H), 8.18 (ddd,  $J = 7.8, 6.2, 1.6$  Hz, 1H), 8.09 (dd,  $J = 7.9, 1.6$  Hz, 1H), 7.92 – 7.85 (m, 2H), 7.67 – 7.63 (m, 2H), 4.12 (s, 3H). Spectra matched literature values.<sup>[7]</sup>

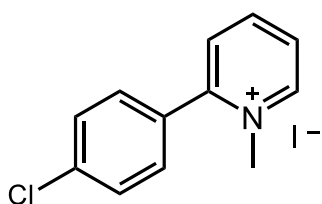**2-(4-chlorophenyl)-1-methylpyridin-1-ium iodide (6a):**

The substance was prepared using **General Procedure A and B**. Yellow solid (1.24 g, 75% yield).  $^1\text{H NMR}$  (400 MHz,  $\text{DMSO-}d_6$ )  $\delta$  9.17 (d,  $J = 6.3$  Hz, 1H), 8.66 (td,  $J = 7.8, 1.5$  Hz, 1H), 8.19 (ddd,  $J = 7.8, 6.1, 1.6$  Hz, 1H), 8.10 (d,  $J = 7.9$  Hz, 1H), 7.80 – 7.70 (m, 4H), 4.12 (s, 3H). Spectra matched literature values.<sup>[6]</sup>

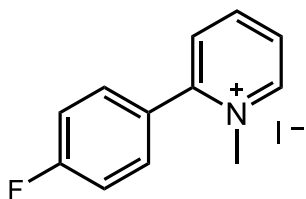**2-(4-fluorophenyl)-1-methylpyridin-1-ium iodide (7a):**

The substance was prepared using **General Procedure A and B**. White solid (1.18 g, 75% yield).  $^1\text{H NMR}$  (400 MHz,  $\text{DMSO-}d_6$ )  $\delta$  9.16 (d,  $J = 6.9$  Hz, 1H), 8.64 (td,  $J = 7.8, 1.5$  Hz, 1H), 8.17 (ddd,  $J = 7.7, 6.2, 1.6$  Hz, 1H), 8.08 (dd,  $J = 8.1, 1.6$  Hz, 1H), 7.81 – 7.75 (m, 2H), 7.55 – 7.49 (m, 2H), 4.12 (s, 3H). Spectra matched literature values.<sup>[6]</sup>

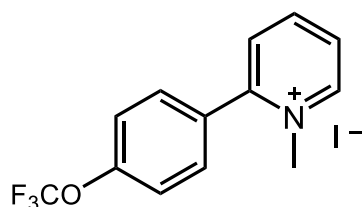**1-methyl-2-(4-(trifluoromethoxy)phenyl)pyridin-1-ium iodide (8a):**

The substance was prepared using **General Procedure A and B**. Yellow solid (1.56 g, 82% yield).  $^1\text{H NMR}$  (400 MHz,  $\text{DMSO-}d_6$ )  $\delta$  9.17 (d,  $J = 6.1$  Hz, 1H), 8.66 (td,  $J = 7.9, 1.4$  Hz, 1H), 8.19 (ddd,  $J = 7.8, 6.2, 1.6$  Hz, 1H), 8.12 (dd,  $J = 8.0, 1.6$  Hz, 1H), 7.88 – 7.83 (m, 2H), 7.69 – 7.67 (m, 2H), 4.12 (s, 3H).  $^{19}\text{F NMR}$  (376 MHz,  $\text{DMSO-}d_6$ )  $\delta$  -56.65.  $^{13}\text{C}$   $\{^1\text{H}\}$  NMR (101 MHz,  $\text{DMSO-}d_6$ )  $\delta$  154.2, 150.5, 147.3, 146.0, 132.3, 131.4, 130.4, 127.5, 121.9, 121.7 (q,  $J_{\text{CF}} = 252.5$  Hz), 47.7. **HRMS (ESI)**: call for  $\text{C}_{13}\text{H}_{11}\text{F}_3\text{NO}$   $[\text{M-I}]^+$ : 254.0787. Found: 254.0776.

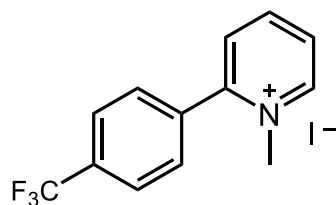

**1-methyl-2-(4-(trifluoromethyl)phenyl)pyridin-1-ium**

**iodide (9a):** The substance was prepared using **General**

**Procedure A and B.** Yellow solid (1.54 g, 84% yield).  $^1\text{H}$

**NMR** (400 MHz,  $\text{DMSO-}d_6$ )  $\delta$  9.20 (d,  $J = 5.5$  Hz, 1H),

8.69 (td,  $J = 7.9, 1.4$  Hz, 1H), 8.23 (ddd,  $J = 7.8, 6.1, 1.6$  Hz, 1H), 8.14 (dd,  $J = 8.0, 1.6$

Hz, 1H), 8.08 – 8.03 (m, 2H), 7.97 – 7.92 (m, 2H), 4.12 (s, 3H). Spectra matched

literature values.<sup>[6]</sup>

**2-(4-(9H-carbazol-9-yl)phenyl)-1-methylpyridin-1-ium iodide (10a):** The substance

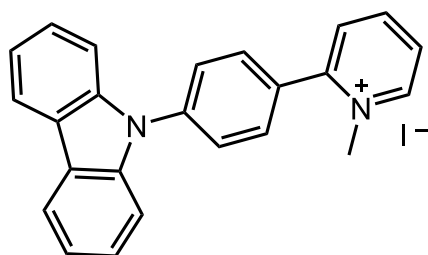

was prepared using **General Procedure A and B.**

Brown solid (1.61 g, 70% yield).  $^1\text{H}$  **NMR** (400

MHz,  $\text{DMSO-}d_6$ )  $\delta$  9.20 (d,  $J = 6.3$  Hz, 1H), 8.71

(t,  $J = 7.9$  Hz, 1H), 8.29 (d,  $J = 7.7$  Hz, 2H), 8.27 –

8.19 (m, 2H), 8.03 – 7.93 (m, 4H), 7.56 (d,  $J = 8.2$

Hz, 2H), 7.50 (ddd,  $J = 8.2, 7.0, 1.3$  Hz, 2H), 7.35 (td,  $J = 7.4, 1.1$  Hz, 2H), 4.27 (s, 3H).

$^{13}\text{C}$   $\{^1\text{H}\}$  **NMR** (101 MHz,  $\text{DMSO-}d_6$ )  $\delta$  154.9, 147.3, 146.0, 140.2, 139.8, 131.8, 130.9,

130.4, 127.4, 127.3, 126.9, 123.6, 121.2, 121.1, 110.3, 47.8. **HRMS (ESI):** call for

$\text{C}_{24}\text{H}_{19}\text{N}_2$   $[\text{M-I}]^+$ : 335.1543. Found: 335.1535.

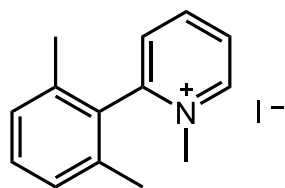

**2-(2,6-dimethylphenyl)-1-methylpyridin-1-ium**

**iodide (11a):** The substance was prepared using **General Procedure**

**A and B.** White solid (1.18 g, 73% yield).  $^1\text{H}$  **NMR** (400

MHz,  $\text{DMSO-}d_6$ )  $\delta$  9.25 (d,  $J = 6.3$  Hz, 1H), 8.71 (td,  $J = 7.9,$

1.4 Hz, 1H), 8.23 (ddd,  $J = 7.8, 6.2, 1.6$  Hz, 1H), 8.09 (dd,  $J = 7.8, 1.5$  Hz, 1H), 7.48 –

7.44 (m, 1H), 7.32 (d,  $J = 7.6$  Hz, 2H), 3.93 (s, 3H), 1.99 (s, 6H). Spectra matched

literature values.<sup>[8]</sup>

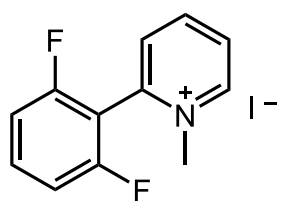

**2-(2,6-difluorophenyl)-1-methylpyridin-1-ium**

**iodide (12a):** The substance was prepared using **General Procedure**

**A and B.** White solid (1.27 g, 76% yield).  $^1\text{H}$  **NMR** (400 MHz,

$\text{DMSO-}d_6$ )  $\delta$  9.20 (d,  $J = 6.7$  Hz, 1H), 8.69 (td,  $J = 7.9, 1.4$  Hz,

1H), 8.23 (ddd,  $J = 7.8, 6.1, 1.5$  Hz, 1H), 8.14 (dd,  $J = 8.0, 1.5$  Hz, 1H), 7.64 (tt,  $J =$

9.5, 2.4 Hz, 1H), 7.59 – 7.49 (m, 2H), 4.15 (s, 3H).  $^{19}\text{F}$  NMR (376 MHz, DMSO- $d_6$ )  $\delta$  -107.70.  $^{13}\text{C}$  { $^1\text{H}$ } NMR (101 MHz, DMSO- $d_6$ )  $\delta$  162.7 (dd,  $J_{\text{CF}} = 252.5$  Hz, 10.1 Hz), 152.8, 147.3, 146.2, 134.9 (t,  $J_{\text{CF}} = 10.8$  Hz), 130.4, 128.0, 114.2 – 113.6 (m), 107.2 (t,  $J_{\text{CF}} = 25.7$  Hz), 47.7. **HRMS (ESI)**: call for  $\text{C}_{12}\text{H}_{10}\text{F}_2\text{N}$  [M-I] $^+$ : 206.0776. Found: 206.0771.

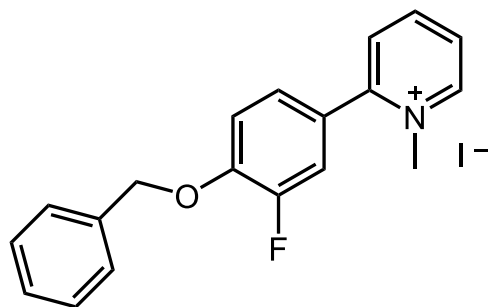

**2-(4-(benzyloxy)-3-fluorophenyl)-1-methylpyridin-1-ium iodide (13a)**: White solid (1.72 g, 82% yield).  $^1\text{H}$  NMR (400 MHz, DMSO- $d_6$ )  $\delta$  9.18 (d,  $J = 6.2$  Hz, 1H), 8.67 (t,  $J = 7.8$  Hz, 1H), 8.24 – 8.16 (m, 1H), 8.10 (d,  $J = 7.9$  Hz, 1H), 7.72 (d,  $J = 8.1$  Hz, 1H), 7.56 (dd,  $J = 10.1$ ,

8.4 Hz, 1H), 7.49 (d,  $J = 8.4$  Hz, 1H), 7.44 (dd,  $J = 8.3$ , 6.8 Hz, 2H), 7.41 – 7.34 (m, 1H), 7.30 (ddt,  $J = 8.1$ , 3.8, 1.7 Hz, 1H), 5.26 (s, 2H), 4.12 (s, 3H).  $^{13}\text{C}$  { $^1\text{H}$ } NMR (101 MHz, DMSO- $d_6$ )  $\delta$  154.5, 153.6 (d,  $J_{\text{CF}} = 252.5$  Hz), 147.1, 146.7 (d,  $J_{\text{CF}} = 11.0$  Hz), 145.9, 136.4, 130.4, 129.1, 128.8 (d,  $J_{\text{CF}} = 3.3$  Hz), 128.5, 127.3, , 123.2 (d,  $J_{\text{CF}} = 7.8$  Hz), 117.4, 117.2, 117.2 (d,  $J_{\text{CF}} = 2.8$  Hz), 71.1, 47.6. **HRMS (ESI)**: call for  $\text{C}_{19}\text{H}_{17}\text{FNO}$  [M-I] $^+$ : 294.1289. Found: 294.1281.

**2-(3-((5-(4-fluorophenyl)thiophen-2-yl) methyl)-4-methylphenyl)-1-methylpyridin-**

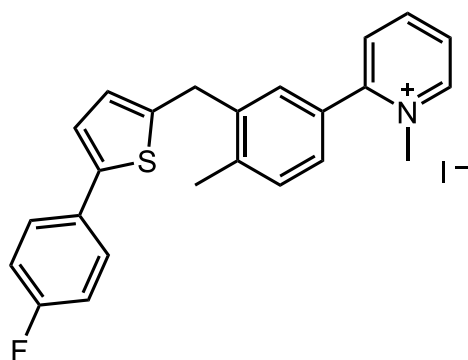

**1-ium iodide (14a)**: Light yellow solid (2.03 g, 81% yield).  $^1\text{H}$  NMR (400 MHz, DMSO- $d_6$ )  $\delta$  9.13 (d,  $J = 6.2$  Hz, 1H), 8.63 (t,  $J = 7.9$  Hz, 1H), 8.14 (t,  $J = 7.0$  Hz, 1H), 8.07 (d,  $J = 7.9$  Hz, 1H), 7.69 – 7.56 (m, 3H), 7.56 – 7.45 (m, 2H), 7.32 (d,  $J = 3.7$  Hz, 1H), 7.22 (t,  $J = 8.8$  Hz, 2H), 6.90 (d,  $J = 3.6$  Hz, 1H), 4.27 (s, 2H), 4.16 (s,

3H), 2.42 (s, 3H).  $^{19}\text{F}$  NMR (376 MHz, DMSO- $d_6$ )  $\delta$  -114.85.  $^{13}\text{C}$  { $^1\text{H}$ } NMR (101 MHz, DMSO- $d_6$ )  $\delta$  161.9 (d,  $J_{\text{CF}} = 242.4$  Hz), 155.4, 147.2, 145.9, 142.8, 141.1, 140.2, 139.9, 131.4, 130.9 (d,  $J_{\text{CF}} = 3.2$  Hz), 130.3 (d,  $J_{\text{CF}} = 7.8$  Hz), 130.1, 128.2, 127.5, 127.4,

126.9, 124.1, 116.5, 116.3, 47.7, 33.5, 19.5. **HRMS (ESI):** call for  $C_{24}H_{21}FN$   $[M-I]^+$ : 374.1373. **Found:** 374.1356.

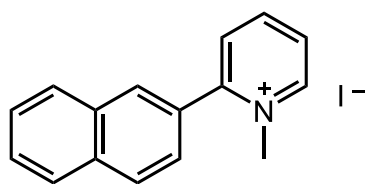

**1-methyl-2-(naphthalen-2-yl)pyridin-1-ium iodide**

**(15a):** The substance was prepared using **General Procedure A and B**. Yellow solid (1.40 g, 81% yield).

**$^1H$  NMR** (400 MHz,  $DMSO-d_6$ )  $\delta$  9.29 (d,  $J = 6.8$  Hz, 1H), 8.73 (td,  $J = 7.9, 1.5$  Hz, 1H), 8.29 (ddd,  $J = 13.4, 7.6, 1.8$  Hz, 2H), 8.22 – 8.12 (m, 2H), 7.82 – 7.74 (m, 2H), 7.68 (ddd,  $J = 8.2, 6.8, 1.2$  Hz, 1H), 7.60 (ddd,  $J = 8.3, 6.8, 1.4$  Hz, 1H), 7.43 (d,  $J = 8.4$  Hz, 1H), 3.95 (s, 3H). Spectra matched literature values.<sup>[6]</sup>

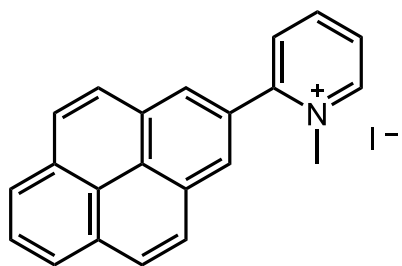

**1-methyl-2-(pyren-2-yl)pyridin-1-ium iodide**

**(16a):** The substance was prepared using **General Procedure A and B**. Yellow solid (1.5 g, 71% yield).

**$^1H$  NMR** (400 MHz,  $DMSO-d_6$ )  $\delta$  9.35 (d,  $J = 6.3$  Hz, 1H), 8.79 (td,  $J = 7.9, 1.4$  Hz, 1H), 8.55 (d,  $J = 7.9$  Hz, 1H), 8.47 (t,  $J = 8.0$  Hz, 2H), 8.41 (d,  $J = 9.0$  Hz, 1H), 8.37 – 8.25 (m, 5H), 8.20 (t,  $J = 7.6$  Hz, 1H), 7.74 (d,  $J = 9.2$  Hz, 1H), 4.01 (s, 3H). Spectra matched literature values.<sup>[6]</sup>

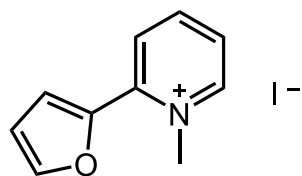

**2-(furan-2-yl)-1-methylpyridin-1-ium iodide (17a):** The

substance was prepared using **General Procedure A and B**.

Light yellow solid (1.11 g, 77% yield).  **$^1H$  NMR** (400 MHz,  $DMSO-d_6$ )  $\delta$  9.01 (d,  $J = 6.2$  Hz, 1H), 8.57 (td,  $J = 8.0, 1.5$  Hz, 1H), 8.44 (dd,  $J = 8.4, 1.5$  Hz, 1H), 8.29 (d,  $J = 1.8$  Hz, 1H), 7.98 (ddd,  $J = 7.7, 6.2, 1.5$  Hz, 1H), 7.75 (d,  $J = 3.7$  Hz, 1H), 6.98 (dd,  $J = 3.8, 1.7$  Hz, 1H), 4.44 (s, 3H). Spectra matched literature values.<sup>[6]</sup>

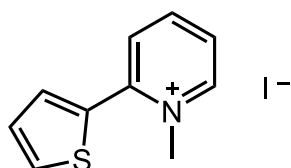

**1-methyl-2-(thiophen-2-yl)pyridin-1-ium iodide (18a):** The

substance was prepared using **General Procedure A and B**.

Yellow solid (1.09 g, 60% yield).  **$^1H$  NMR** (400 MHz,  $DMSO-$

$d_6$ )  $\delta$  9.13 (d,  $J = 6.0$  Hz, 1H), 8.58 (td,  $J = 7.9, 1.5$  Hz, 1H), 8.22 (dd,  $J = 8.1, 1.5$  Hz, 1H), 8.15 – 8.07 (m, 2H), 7.82 (dd,  $J = 3.7, 1.2$  Hz, 1H), 7.38 (dd,  $J = 5.1, 3.7$  Hz, 1H), 4.32 (s, 3H). Spectra matched literature values.<sup>[6]</sup>

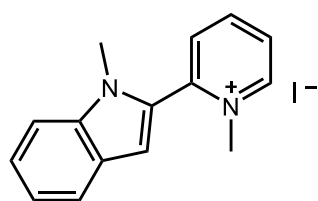

**1-methyl-2-(1-methyl-1H-indol-2-yl)pyridin-1-ium**

**iodide (19a):** The sub-stance was prepared using **General Procedure A and B**. Yellow solid (0.43 g, 72% yield).  $^1\text{H}$  NMR (400 MHz, DMSO- $d_6$ )  $\delta$  9.27 (d,  $J = 6.2$  Hz, 1H), 8.70 (t,  $J = 7.9$  Hz, 1H), 8.32 – 8.27 (m, 1H), 8.27 – 8.20 (m, 1H), 7.74 (d,  $J = 8.0$  Hz, 1H), 7.66 (d,  $J = 8.4$  Hz, 1H), 7.42 – 7.34 (m, 1H), 7.21 (t,  $J = 7.5$  Hz, 1H), 7.12 (s, 1H), 4.27 (s, 3H), 3.73 (s, 3H).  $^{13}\text{C}$   $\{^1\text{H}\}$  NMR (101 MHz, DMSO- $d_6$ )  $\delta$  148.3, 146.9, 145.4, 138.7, 131.6, 129.3, 127.7, 127.0, 124.4, 122.0, 121.1, 111.4, 107.8, 47.7, 31.8. **HRMS (ESI):** call for  $\text{C}_{15}\text{H}_{15}\text{N}_2$   $[\text{M}-\text{I}]^+$ : 223.1230. Found:223.1234.

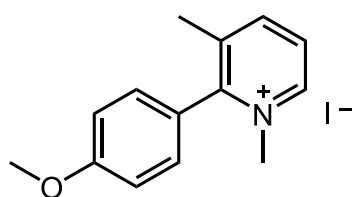

**2-(4-methoxyphenyl)-1,3-dimethylpyridin-1-ium**

**iodide (20a):** The substance was prepared using **General Procedure A and B**. Brown solid (1.39 g, 82% yield).  $^1\text{H}$  NMR (400 MHz, DMSO- $d_6$ )  $\delta$  9.02 (d,  $J = 7.5$  Hz, 1H), 8.56 (d,  $J = 7.9$  Hz, 1H), 8.06 (dd,  $J = 8.0, 6.1$  Hz, 1H), 7.53 – 7.44 (m, 2H), 7.25 – 7.17 (m, 2H), 3.95 (s, 3H), 3.86 (s, 3H), 2.17 (s, 3H). Spectra matched literature values.<sup>[9]</sup>

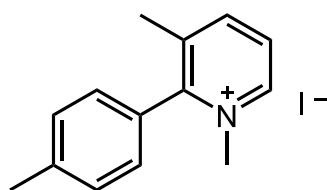

**1,3-dimethyl-2-(p-tolyl)pyridin-1-ium iodide (21a):**

The sub-stance was prepared using **General Procedure A and B**. Yellow solid (1.46 g, 90% yield).  $^1\text{H}$  NMR (400 MHz, DMSO- $d_6$ )  $\delta$  9.03 (d,  $J = 6.1$  Hz, 1H), 8.58 (d,  $J = 7.3$  Hz, 1H), 8.08 (dd,  $J = 8.0, 6.1$  Hz, 1H), 7.54 – 7.38 (m, 4H), 3.93 (s, 3H), 2.43 (s, 3H), 2.16 (s, 3H). Spectra matched literature values.<sup>[9]</sup>

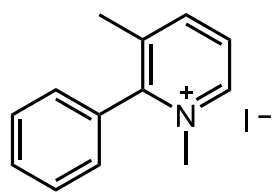

**1,3-dimethyl-2-phenylpyridin-1-ium iodide (22a):** The substance was prepared using **General Procedure A and B**. Yellow solid (1.14 g, 73% yield).  $^1\text{H NMR}$  (400 MHz,  $\text{DMSO-}d_6$ )  $\delta$  9.05 (d,  $J = 6.2$  Hz, 1H), 8.59 (d,  $J = 8.0$  Hz, 1H), 8.10 (t,  $J = 7.1$  Hz, 1H), 7.72 – 7.61 (m, 3H), 7.62 – 7.53 (m, 2H), 3.94 (s, 3H), 2.15 (s, 3H). Spectra matched literature values.<sup>[9]</sup>

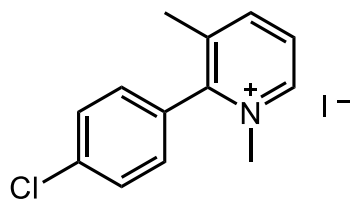

**2-(4-chlorophenyl)-1,3-dimethylpyridin-1-ium iodide (23a):** The substance was prepared using **General Procedure A and B**. Yellow solid (1.28 g, 74% yield).  $^1\text{H NMR}$  (400 MHz,  $\text{DMSO-}d_6$ )  $\delta$  9.05 (d,  $J = 6.2$  Hz, 1H), 8.60 (d,  $J = 8.0$  Hz, 1H), 8.11 (dd,  $J = 8.0, 6.1$  Hz, 1H), 7.81 – 7.72 (m, 2H), 7.66 – 7.58 (m, 2H), 3.94 (s, 3H), 2.16 (s, 3H). Spectra matched literature values.<sup>[9]</sup>

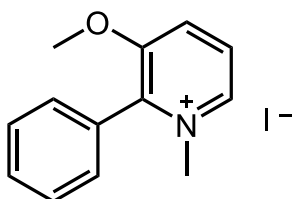

**3-methoxy-1-methyl-2-phenylpyridin-1-ium iodide (24a):** The substance was prepared using **General Procedure A and B**. Yellow solid (1.21 g, 74% yield).  $^1\text{H NMR}$  (400 MHz,  $\text{DMSO-}d_6$ )  $\delta$  8.78 (d,  $J = 5.5$  Hz, 1H), 8.39 (d,  $J = 7.9$  Hz, 1H), 8.15 (dd,  $J = 8.8, 6.1$  Hz, 1H), 7.69 – 7.59 (m, 3H), 7.60 – 7.52 (m, 2H), 3.97 (s, 3H), 3.90 (s, 3H). Spectra matched literature values.<sup>[9]</sup>

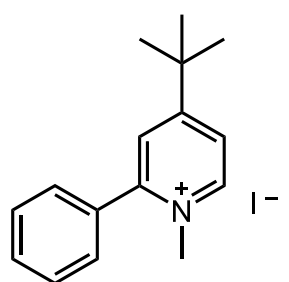

**4-(tert-butyl)-1-methyl-2-phenylpyridin-1-ium iodide (25a):** The substance was prepared using **General Procedure A and B**. Yellow solid (1.43 g, 81% yield).  $^1\text{H NMR}$  (400 MHz,  $\text{DMSO-}d_6$ )  $\delta$  9.05 (d,  $J = 6.7$  Hz, 1H), 8.21 (dd,  $J = 6.6, 2.4$  Hz, 1H), 8.00 (d,  $J = 2.3$  Hz, 1H), 7.75 – 7.67 (m, 3H), 7.70 – 7.61 (m, 4H), 4.07 (s, 3H), 1.40 (s, 9H). Spectra matched literature values.<sup>[9]</sup>

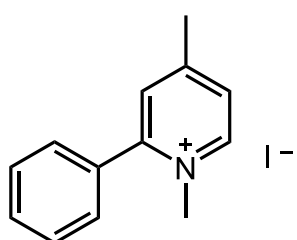

**1,4-dimethyl-2-phenylpyridin-1-ium iodide (26a):** The substance was prepared using **General Procedure A and B**. White solid (1.03 g, 66% yield).  $^1\text{H NMR}$  (400 MHz,  $\text{DMSO-}d_6$ )  $\delta$  8.98 (d,  $J = 6.4$  Hz, 1H), 8.00 (dd,  $J = 6.4, 2.0$  Hz, 1H),

7.96 (d,  $J = 2.1$  Hz, 1H), 7.71 – 7.61 (m, 5H), 4.05 (s, 3H), 3.34 (s, 3H). Spectra matched literature values.<sup>[9]</sup>

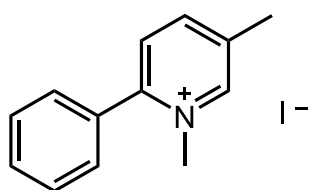

**1,5-dimethyl-2-phenylpyridin-1-ium iodide (27a):** The substance was prepared using **General Procedure A and B**. Light yellow solid (1.07 g, 69% yield). <sup>1</sup>H NMR (400 MHz, DMSO-*d*<sub>6</sub>)  $\delta$  9.11 (s, 1H), 8.50 (d,  $J = 8.2$  Hz, 1H), 7.99 (d,  $J = 8.1$  Hz, 1H), 7.70 – 7.60 (m, 5H), 4.09 (s, 3H), 2.55 (s, 3H). Spectra matched literature values.<sup>[9]</sup>

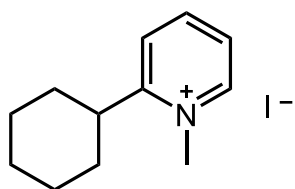

**2-cyclohexyl-1-methylpyridin-1-ium iodide (28a):** The substance was prepared using **General Procedure B**. White solid (1.12 g, 74% yield). <sup>1</sup>H NMR (400 MHz, DMSO-*d*<sub>6</sub>)  $\delta$  8.94 (d,  $J = 6.3$  Hz, 1H), 8.54 – 8.49 (m, 1H), 8.10 (d,  $J = 8.2$  Hz, 1H), 7.93 (ddd,  $J = 7.8, 6.2, 1.5$  Hz, 1H), 4.34 (s, 3H), 3.22 – 3.15 (m, 1H), 1.94 (d,  $J = 11.5$  Hz, 2H), 1.83 (dd,  $J = 12.3, 3.1$  Hz, 2H), 1.79 – 1.69 (m, 1H), 1.61 – 1.38 (m, 4H), 1.38 – 1.23 (m, 1H). Spectra matched literature values.<sup>[6]</sup>

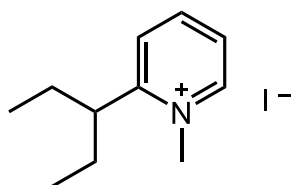

**1-methyl-2-(pentan-3-yl)pyridin-1-ium iodide (29a):** The substance was prepared using **General Procedure B**. White solid (1.28 g, 88% yield). <sup>1</sup>H NMR (400 MHz, DMSO-*d*<sub>6</sub>)  $\delta$  8.99 (d,  $J = 6.3$  Hz, 1H), 8.54 (t,  $J = 7.9$  Hz, 1H), 8.11 (dd,  $J = 8.3, 1.5$  Hz, 1H), 7.97 (ddd,  $J = 7.7, 6.2, 1.5$  Hz, 1H), 4.34 (s, 3H), 3.31 – 3.24 (m, 1H), 1.86 – 1.68 (m, 4H), 0.81 (t,  $J = 7.4$  Hz, 6H). Spectra matched literature values.<sup>[6]</sup>

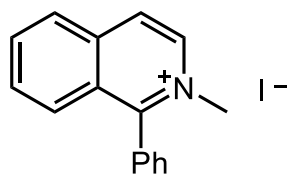

**2-methyl-1-phenylisoquinolin-2-ium iodide (30a):** The substance was prepared using **General Procedure A and B**. Yellow solid (1.56 g, 90% yield). <sup>1</sup>H NMR (400 MHz, DMSO-*d*<sub>6</sub>)  $\delta$  8.94 (d,  $J = 6.9$  Hz, 1H), 8.69 (d,  $J = 6.8$  Hz, 1H), 8.43 (d,  $J = 8.2$  Hz, 1H), 8.24 (ddd,  $J = 8.2, 7.0, 1.2$  Hz, 1H), 7.94 (ddd,  $J = 8.4, 7.0, 1.2$  Hz, 1H), 7.82 – 7.70 (m, 5H), 7.62 (d,  $J = 8.6$  Hz, 1H), 4.11 (s, 3H). Spectra matched literature values.<sup>[10]</sup>

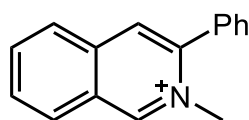

**2-methyl-3-phenylisoquinolin-2-ium iodide (31a):** The sub-stance was prepared using **General Procedure A and B**. Yellow solid (1.38 g, 80% yield).  $^1\text{H NMR}$  (400 MHz, DMSO- $d_6$ )  $\delta$  10.24 (s, 1H), 8.57 (s, 1H), 8.54 (d,  $J = 8.4$  Hz, 1H), 8.35 (d,  $J = 8.3$  Hz, 1H), 8.33 – 8.24 (m, 1H), 8.10 (ddd,  $J = 8.2, 6.9, 1.3$  Hz, 1H), 7.78 – 7.69 (m, 2H), 7.70 – 7.65 (m, 3H), 4.22 (s, 3H).  $^{13}\text{C } \{^1\text{H}\}$  NMR (101 MHz, DMSO- $d_6$ )  $\delta$  152.3, 146.2, 137.9, 137.5, 132.7, 131.7, 131.0, 130.4, 130.3, 129.5, 127.6, 127.2, 127.0, 47.9. **HRMS (ESI):** call for  $\text{C}_{16}\text{H}_{14}\text{N} [\text{M-I}]^+$ : 220.1121. Found: 220.1116.

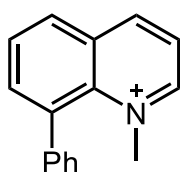

**1-methyl-8-phenylquinolin-1-ium iodide (32a):** The substance was prepared using **General Procedure A and B**. Yellow solid (1.41 g, 81% yield).  $^1\text{H NMR}$  (400 MHz, DMSO- $d_6$ )  $\delta$  9.44 – 9.36 (m, 2H), 8.54 (dd,  $J = 7.4, 2.4$  Hz, 1H), 8.22 (dd,  $J = 8.2, 5.9$  Hz, 1H), 8.12 – 7.99 (m, 2H), 7.57 – 7.53 (m, 5H), 3.95 (s, 3H).  $^{13}\text{C } \{^1\text{H}\}$  NMR (101 MHz, DMSO- $d_6$ )  $\delta$  153.3, 148.6, 140.4, 140.0, 137.4, 134.4, 131.3, 130.0, 129.3, 129.1, 129.0, 122.5, 51.8. **HRMS (ESI):** call for  $\text{C}_{16}\text{H}_{14}\text{N} [\text{M-I}]^+$ : 220.1121. Found: 220.1113.

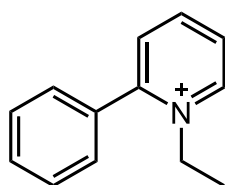

**1-ethyl-2-phenylpyridin-1-ium iodide (33a):** The substance was prepared using **General Procedure B**. Brown solid (1.35 g, 87% yield).  $^1\text{H NMR}$  (400 MHz, DMSO- $d_6$ )  $\delta$  9.25 (dd,  $J = 6.3, 1.4$  Hz, 1H), 8.65 (td,  $J = 7.8, 1.4$  Hz, 1H), 8.22 (ddd,  $J = 7.8, 6.2, 1.5$  Hz, 1H), 8.06 (dd,  $J = 8.0, 1.5$  Hz, 1H), 7.72 – 7.64 (m, 5H), 4.46 (q,  $J = 7.3$  Hz, 2H), 1.35 (t,  $J = 7.3$  Hz, 3H). Spectra matched literature values.<sup>[2]</sup>

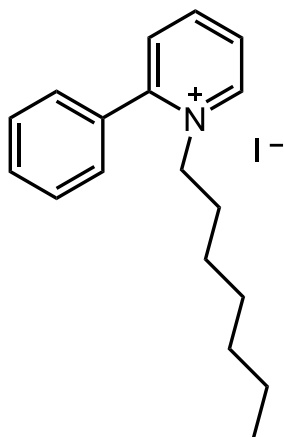

**1-heptyl-2-phenylpyridin-1-ium iodide (34a):** The substance was prepared using **General Procedure B**. Yellow solid (0.98 g, 51% yield).  $^1\text{H NMR}$  (400 MHz,  $\text{DMSO-}d_6$ )  $\delta$  9.25 (dd,  $J = 6.3, 1.4$  Hz, 1H), 8.66 (td,  $J = 7.9, 1.4$  Hz, 1H), 8.22 (ddd,  $J = 7.8, 6.2, 1.6$  Hz, 1H), 8.08 (dd,  $J = 7.9, 1.5$  Hz, 1H), 7.74 – 7.61 (m, 5H), 4.51 – 4.38 (m, 2H), 1.82 – 1.58 (m, 2H), 1.19 – 0.99 (m, 8H), 0.79 (t,  $J = 7.1$  Hz, 3H).  $^{13}\text{C}$   $\{^1\text{H}\}$  **NMR** (101 MHz,  $\text{DMSO-}d_6$ )  $\delta$  155.2, 146.2, 146.0, 132.2, 131.5, 130.9, 129.6, 129.5, 127.7, 58.4, 31.2, 30.3, 28.1, 25.7, 22.3, 14.3. **HRMS (ESI):** call for  $\text{C}_{18}\text{H}_{24}\text{N} [\text{M-I}]^+$ : 254.1903. Found: 254.1902.

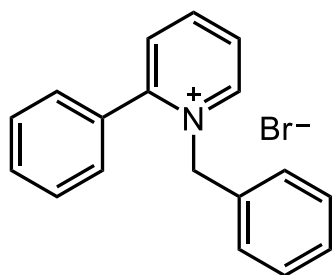

**1-benzyl-2-phenylpyridin-1-ium bromide (35a):** The substance was prepared using **General Procedure B**. White solid (1.38 g, 85% yield).  $^1\text{H NMR}$  (400 MHz,  $\text{DMSO-}d_6$ )  $\delta$  9.37 (dd,  $J = 6.4, 1.4$  Hz, 1H), 8.75 (td,  $J = 7.8, 1.4$  Hz, 1H), 8.28 (ddd,  $J = 7.8, 6.2, 1.6$  Hz, 1H), 8.12 (dd,  $J = 8.0, 1.5$  Hz, 1H), 7.63 (ddt,  $J = 7.8, 6.0, 1.9$  Hz, 1H), 7.59 – 7.50 (m, 4H), 7.34 – 7.22 (m, 3H), 6.96 – 6.84 (m, 2H), 5.83 (s, 2H). Spectra matched literature values.<sup>[2]</sup>

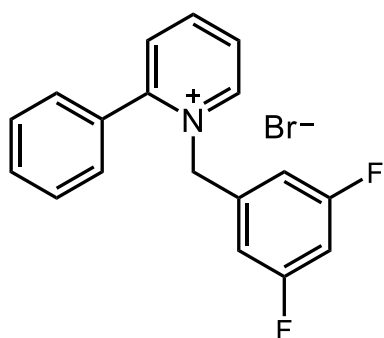

**1-(3,5-difluorobenzyl)-2-phenylpyridin-1-ium bromide (36a):** The substance was prepared using **General Procedure B**. White solid (1.35g, 75% yield).  $^1\text{H NMR}$  (400 MHz,  $\text{DMSO-}d_6$ )  $\delta$  9.39 – 9.36 (m, 1H), 8.76 (td,  $J = 7.9, 1.4$  Hz, 1H), 8.28 (ddd,  $J = 7.7, 6.1, 1.5$  Hz, 1H), 8.12 (dd,  $J = 8.0, 1.5$  Hz, 1H), 7.62 (ddt,  $J = 8.2, 6.2, 1.7$  Hz, 1H), 7.58 – 7.50 (m, 4H), 7.20 (tt,  $J = 9.3, 2.4$  Hz, 1H), 6.68 (dt,  $J = 6.6, 2.1$  Hz, 2H), 5.87 (s, 2H).  $^{19}\text{F}$  **NMR** (376 MHz,  $\text{DMSO-}d_6$ )  $\delta$  -108.95.  $^{13}\text{C}$   $\{^1\text{H}\}$  **NMR** (101 MHz,  $\text{DMSO-}d_6$ )  $\delta$  162.8 (dd,  $J_{\text{CF}} = 242.4$  Hz, 10.1 Hz), 155.4, 147.4, 147.1, 138.2 (t,  $J_{\text{CF}} = 9.9$  Hz), 132.1, 131.4, 131.3, 129.4, 128.1, 111.9 (d,  $J_{\text{CF}} = 10.1$  Hz), 111.8 (d,  $J_{\text{CF}} = 10.1$  Hz), 104.6 (t,  $J_{\text{CF}} = 25.7$  Hz), 60.8. **HRMS (ESI):** call for  $\text{C}_{18}\text{H}_{14}\text{F}_2\text{N} [\text{M-Br}]^+$ : 282.1089. Found: 282.1083.

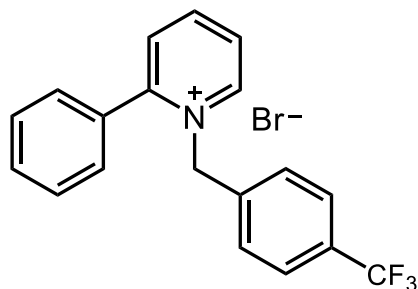

**2-phenyl-1-(4-(trifluoromethyl)benzyl)pyridin-1-ium bromide (37a):**

The substance was prepared using **General Procedure B**. White solid (1.41 g, 72% yield).  $^1\text{H NMR}$  (400 MHz,  $\text{DMSO-}d_6$ )  $\delta$  9.39 (d,  $J = 6.3$  Hz, 1H), 8.78 (td,  $J = 7.9, 1.4$  Hz, 1H), 8.30 (ddd,  $J = 7.8, 6.2, 1.6$  Hz, 1H), 8.15 (dd,  $J = 7.9, 1.5$

Hz, 1H), 7.66 – 7.59 (m, 3H), 7.56 – 7.49 (m, 4H), 7.13 (d,  $J = 8.1$  Hz, 2H), 5.95 (s, 2H).  $^{19}\text{F NMR}$  (376 MHz,  $\text{DMSO-}d_6$ )  $\delta$  -61.18.  $^{13}\text{C} \{^1\text{H}\}$  NMR (101 MHz,  $\text{DMSO-}d_6$ )  $\delta$  155.6, 147.3, 147.2, 138.9, 132.0, 131.5, 131.4, 129.4, 129.3 (q,  $J_{\text{CF}} = 30.3$  Hz), 128.9, 128.1, 126.0 (q,  $J_{\text{CF}} = 3.7$  Hz), 124.4 ((q,  $J_{\text{CF}} = 272.7$  Hz)), 61.1. **HRMS (ESI):** call for  $\text{C}_{19}\text{H}_{15}\text{F}_3\text{N} [\text{M-Br}]^+$ : 314.1151. Found: 314.1140.

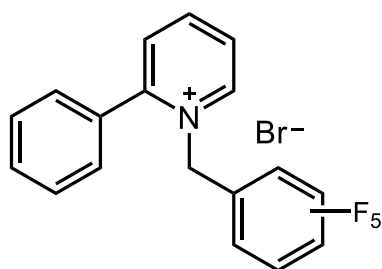

**1-((perfluorophenyl)methyl)-2-phenylpyridin-1-ium bromide (38a):**

The substance was prepared using **General Procedure B**. Light yellow solid (1.31 g, 63% yield).  $^1\text{H NMR}$  (400 MHz,  $\text{DMSO-}d_6$ )  $\delta$  9.41 (d,  $J = 6.2$  Hz, 1H), 8.77 (td,  $J = 7.9, 1.4$  Hz,

1H), 8.29 (ddd,  $J = 7.8, 6.2, 1.6$  Hz, 1H), 8.11 (dd,  $J = 7.9, 1.6$  Hz, 1H), 7.68 – 7.63 (m, 1H), 7.59 (d,  $J = 4.1$  Hz, 4H).  $^{19}\text{F NMR}$  (376 MHz,  $\text{DMSO-}d_6$ )  $\delta$  -140.18 – -140.32 (m), -152.33 (t,  $J = 22.4$  Hz), -161.89 – -162.14 (m).  $^{13}\text{C} \{^1\text{H}\}$  NMR (101 MHz,  $\text{DMSO-}d_6$ )  $\delta$  155.6, 147.7, 147.6, 131.7, 131.6, 131.4, 129.5, 129.2, 127.8, 51.4. **HRMS (ESI):** call for  $\text{C}_{18}\text{H}_{11}\text{F}_5\text{N}^+ [\text{M-Br}]^+$ : 336.0806. Found: 336.0799.

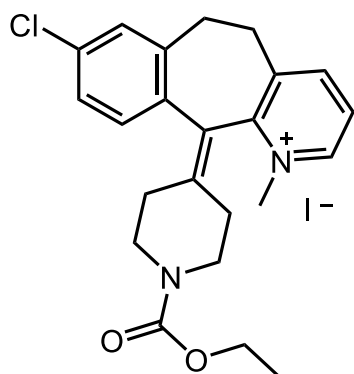

**dihydro-5H-benzo[5,6]cyclohepta[1,2-b]pyridin-1-ium iodide (39a):**

Yellow solid (2.32 g, 89% yield).  $^1\text{H NMR}$  (400 MHz,  $\text{DMSO-}d_6$ )  $\delta$  8.85 (d,  $J = 6.2$  Hz, 1H), 8.57 (d,  $J = 7.8$  Hz, 1H), 8.01 (dd,  $J = 7.9, 6.2$  Hz, 1H), 7.45 – 7.26 (m, 3H), 4.19 (s, 3H), 4.05 (q,  $J = 7.0$  Hz, 2H), 3.83 – 3.78 (m, 1H), 3.72 – 3.68 (m, 1H), 3.49 – 3.38 (m, 2H), 3.19 – 3.08 (m, 3H), 2.99 – 2.82 (m, 1H),

2.46 – 2.33 (m, 2H), 2.23 (ddd,  $J = 14.2, 9.5, 4.8$  Hz, 1H), 1.89 (dt,  $J = 14.2, 4.4$  Hz,

1H), 1.18 (t,  $J = 7.1$  Hz, 3H).  $^{13}\text{C}$   $\{^1\text{H}\}$  NMR (101 MHz, DMSO- $d_6$ )  $\delta$  155.0, 154.3, 145.2, 144.8, 144.3, 140.3, 139.5, 133.7, 132.9, 131.7, 131.2, 126.8, 126.7, 123.7, 61.4, 46.0, 43.9, 43.6, 31.5, 29.3, 15.1. **HRMS (ESI)**: call for  $\text{C}_{23}\text{H}_{26}\text{ClN}_2\text{O}_2$   $[\text{M-I}]^+$ : 397.1677. Found: 397.1669.

**(R)-2-(4-chloro-3-(4-((tetrahydrofuran-3-yl)oxy)benzyl)phenyl)-1-**

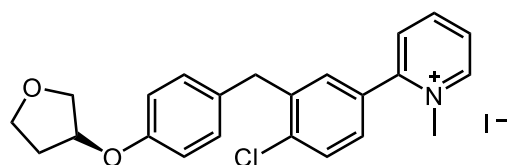

**methylpyridin-1-ium iodide (40a)**: Gray solid (1.54 g, 64% yield).  $^1\text{H}$  NMR (400 MHz, DMSO- $d_6$ )  $\delta$  9.14 (d,  $J = 6.4$  Hz, 1H),

8.64 (t,  $J = 7.9$  Hz, 1H), 8.17 (ddd,  $J = 7.8, 6.1, 1.6$  Hz, 1H), 8.09 (, 1 dd,  $J = 7.9, 1.6$  Hz H), 7.81 – 7.70 (m, 2H), 7.60 (dd,  $J = 8.3, 2.3$  Hz, 1H), 7.18 (d,  $J = 8.6$  Hz, 2H), 6.84 (d,  $J = 8.6$  Hz, 2H), 4.96 (ddt,  $J = 6.3, 4.1, 1.8$  Hz, 1H), 4.11 (d,  $J = 12.7$  Hz, 5H), 3.89 – 3.69 (m, 4H), 2.30 – 2.13 (m, 1H), 1.98 – 1.86 (m, 1H).  $^{13}\text{C}$   $\{^1\text{H}\}$  NMR (101 MHz, DMSO- $d_6$ )  $\delta$  156.1, 154.3, 147.3, 146.0, 140.2, 136.6, 132.5, 131.3, 131.2, 130.6, 130.4, 130.3, 129.5, 127.4, 115.8, 77.4, 72.7, 66.9, 47.7, 38.0, 32.9. **HRMS (ESI)**: call for  $\text{C}_{23}\text{H}_{23}\text{ClNO}_2$   $[\text{M-I}]^+$ : 380.1412. **Found**: 380.1380.

**2-(4-((1-ethoxy-2-methyl-1-oxopropan-2-yl)oxy)phenyl)-1-methylpyridin-1-ium**

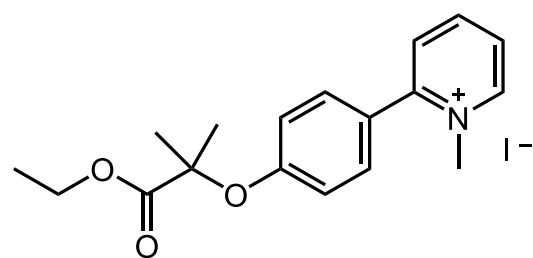

**iodide (41a)**: Yellow solid (1.92 g, 80% yield).  $^1\text{H}$  NMR (400 MHz, DMSO- $d_6$ )  $\delta$  9.11 (d,  $J = 4.8$  Hz, 1H), 8.60 (td,  $J = 7.8, 1.5$  Hz, 1H), 8.12 (ddd,  $J = 7.8, 6.2, 1.6$  Hz, 1H), 8.06 (d,  $J = 6.5$  Hz, 1H), 7.70 – 7.56

(m, 2H), 7.15 – 6.96 (m, 2H), 4.20 (q,  $J = 7.1$  Hz, 2H), 4.14 (s, 3H), 1.62 (s, 6H), 1.17 (t,  $J = 7.1$  Hz, 3H).  $^{13}\text{C}$   $\{^1\text{H}\}$  NMR (101 MHz, DMSO- $d_6$ )  $\delta$  173.2, 157.7, 155.3, 147.1, 145.7, 131.4, 130.4, 126.7, 125.1, 118.5, 79.5, 61.8, 47.6, 25.6, 14.4. **HRMS (ESI)**: call for  $\text{C}_{18}\text{H}_{22}\text{NO}_3$   $[\text{M-I}]^+$ : 300.1594. **Found**: 300.1591.

## 2-(3-(((1R,2S,5R)-2-isopropyl-5-methyl-cyclohexyl)oxy)carbonyl)phenyl)-1-

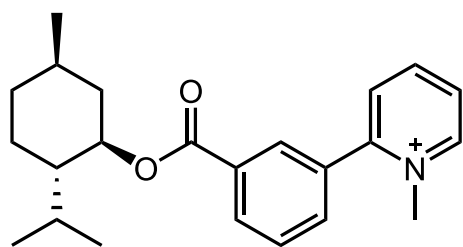**methyl-pyridin-1-ium iodide (42a):**

Yellow solid (1.92 g, 80% yield).  $^1\text{H}$

**NMR** (400 MHz,  $\text{DMSO-}d_6$ )  $\delta$  9.17 (d,  $J$   
 $= 5.2$  Hz, 1H), 8.67 (td,  $J = 7.9, 1.4$  Hz,  
 1H), 8.26 – 8.23 (m, 1H), 8.23 – 8.17 (m,

2H), 8.14 (d,  $J = 8.0$  Hz, 1H), 8.00 – 7.98 (m, 1H), 7.82 (t,  $J = 7.8$  Hz, 1H), 4.90 (td,  $J$   
 $= 10.8, 4.3$  Hz, 1H), 4.10 (s, 3H), 2.07 – 1.95 (m, 1H), 1.89 (td,  $J = 6.9, 2.7$  Hz, 1H),  
 1.74 – 1.61 (m, 2H), 1.58 – 1.52 (m, 2H), 1.17 – 1.08 (m, 2H), 0.89 (dd,  $J = 8.6, 6.7$   
 Hz, 7H), 0.76 (d,  $J = 6.9$  Hz, 3H).  $^{13}\text{C}$   $\{^1\text{H}\}$  **NMR** (101 MHz,  $\text{DMSO-}d_6$ )  $\delta$  164.9, 154.4,  
 147.2, 146.0, 134.3, 132.9, 131.9, 131.2, 130.4, 130.4, 130.2, 127.5, 75.2, 47.7, 47.0,  
 41.0, 34.2, 31.3, 26.6, 23.6, 22.4, 21.0, 16.9. **HRMS (ESI):** call for  $\text{C}_{23}\text{H}_{30}\text{NO}_2$   $[\text{M-I}]^+$ :  
 352.2271. **Found:** 352.2262.

## 1-methyl-2-((8R,9S,13S,14S)-13-methyl-17-oxo-7,8,9,11,12,13,14,15,16,17-

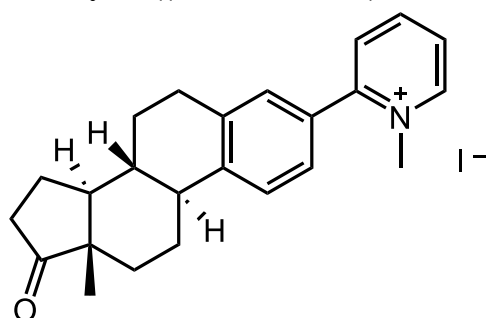**decahydro-6H-cyclopenta[a]phenanthren-3-yl)pyridin-1-ium iodide (43a):**

Yellow solid (1.68 g, 71% yield).  $^1\text{H}$  **NMR** (400 MHz,  
 $\text{DMSO-}d_6$ )  $\delta$  9.13 (d,  $J = 5.3$  Hz, 1H), 8.63 (t,  
 $J = 7.9$  Hz, 1H), 8.15 (t,  $J = 7.0$  Hz, 1H), 8.05  
 (d,  $J = 9.6$  Hz, 1H), 7.57 (d,  $J = 8.2$  Hz, 1H),

7.46 (dd,  $J = 8.2, 2.0$  Hz, 1H), 7.42 (s, 1H), 4.16 (s, 3H), 2.97 (dd,  $J = 9.1, 4.2$  Hz, 2H),  
 2.50 – 2.35 (m, 3H), 2.15 – 1.96 (m, 3H), 1.86 – 1.77 (m, 1H), 1.68 – 1.38 (m, 6H),  
 0.87 (s, 3H).  $^{13}\text{C}$   $\{^1\text{H}\}$  **NMR** (101 MHz,  $\text{DMSO-}d_6$ )  $\delta$  155.6, 147.1, 145.8, 143.4, 137.8,  
 130.3, 130.0, 129.7, 126.9, 126.5, 50.1, 47.7, 47.6, 44.4, 37.7, 35.9, 31.8, 29.3, 26.1,  
 25.6, 21.6, 14.0. **HRMS (ESI):** call for  $\text{C}_{24}\text{H}_{28}\text{NO}$   $[\text{M-I}]^+$ : 346.2165. **Found:** 346.2161.

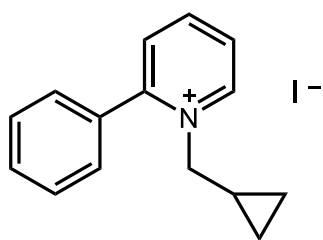

**1-(cyclopropylmethyl)-2-phenylpyridin-1-ium iodide**

**(1aa):** Yellow solid (1.03 g, 61% yield).  $^1\text{H NMR}$  (400 MHz,  $\text{DMSO-}d_6$ )  $\delta$  9.29 (dd,  $J = 6.4, 1.4$  Hz, 1H), 8.69 (td,  $J = 7.8, 1.5$  Hz, 1H), 8.24 (ddd,  $J = 7.8, 6.2, 1.6$  Hz, 1H), 8.09 (dd,  $J = 8.0, 1.6$  Hz, 1H), 7.73 – 7.71 (m, 2H), 7.69 – 7.64 (m, 3H), 4.37 (d,  $J = 7.3$  Hz, 2H), 1.13 – 1.07 (m, 1H), 0.59 – 0.49 (m, 2H), 0.39 (dt,  $J = 6.5, 4.5$  Hz, 2H).  $^{13}\text{C}$   $\{^1\text{H}\}$  NMR (101 MHz,  $\text{DMSO-}d_6$ )  $\delta$  155.1, 146.1, 145.8, 132.3, 131.5, 130.9, 129.6, 129.6, 127.7, 62.8, 11.7, 4.7. **HRMS (ESI):** call for  $\text{C}_{15}\text{H}_{16}\text{N}^+$  [ $\text{M-Br}$ ] $^+$ : 210.1277. Found: 210.1275.

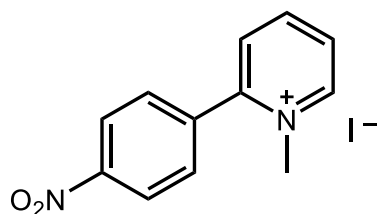

**1-methyl-2-(4-nitrophenyl)pyridin-1-ium iodide**

**(1ab):** The substance was prepared using **General Procedure A and B**. Yellow solid (1.39 g, 81% yield).  $^1\text{H NMR}$  (400 MHz,  $\text{DMSO-}d_6$ )  $\delta$  9.21 (dd,  $J = 6.3, 1.4$  Hz, 1H), 8.71 (td,  $J = 7.9, 1.5$  Hz, 1H), 8.63 (t,  $J = 2.0$  Hz, 1H), 8.52 (ddd,  $J = 8.3, 2.3, 1.1$  Hz, 1H), 8.24 (ddd,  $J = 7.8, 6.2, 1.6$  Hz, 1H), 8.21 – 8.12 (m, 2H), 7.97 (t,  $J = 8.0$  Hz, 1H), 4.13 (s, 3H). Spectra matched literature values.<sup>[11]</sup>

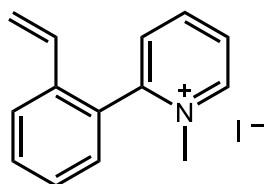

**1-methyl-2-(2-vinylphenyl)pyridin-1-ium iodide (1ac):** The substance was prepared using **General Procedure A and B**.

Yellow solid (1.21 g, 75% yield).  $^1\text{H NMR}$  (400 MHz,  $\text{DMSO-}d_6$ )  $\delta$  9.21 (d,  $J = 6.1$  Hz, 1H), 8.67 (t,  $J = 7.6$  Hz, 1H), 8.23 (t,  $J = 6.7$  Hz, 1H), 8.06 (d,  $J = 7.8$  Hz, 1H), 7.93 (d,  $J = 7.9$  Hz, 1H), 7.81 – 7.64 (m, 1H), 7.62 – 7.50 (m, 2H), 6.35 (dd,  $J = 17.2, 11.0$  Hz, 1H), 5.89 (d,  $J = 17.2$  Hz, 1H), 5.36 (d,  $J = 11.0$  Hz, 1H), 3.96 (s, 3H).  $^{13}\text{C}$   $\{^1\text{H}\}$  NMR (101 MHz,  $\text{DMSO-}d_6$ )  $\delta$  154.3, 147.7, 146.0, 136.2, 133.0, 131.9, 130.7, 130.4, 129.9, 129.0, 127.6, 126.5, 119.5, 47.1. **HRMS (ESI):** call for  $\text{C}_{14}\text{H}_{14}\text{N}^+$  [ $\text{M-I}$ ] $^+$ : 196.1121. Found: 196.1106.

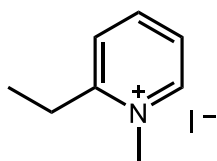

**2-ethyl-1-methylpyridin-1-ium iodide (1ad):** The substance

was prepared using **General Procedure B**. Brown solid (0.78 g, 63% yield).  $^1\text{H NMR}$  (400 MHz,  $\text{DMSO-}d_6$ )  $\delta$  8.97 (d,  $J = 6.2$  Hz, 1H), 8.61 (t,  $J = 7.9$  Hz, 1H), 8.22 (d,  $J = 8.1$  Hz, 1H), 8.10

– 7.88 (m, 1H), 6.17 (d,  $J = 5.0$  Hz, 1H), 5.41 – 5.08 (m, 1H), 4.35 (s, 3H), 1.49 (d,  $J = 6.4$  Hz, 3H).  $^{13}\text{C}$  { $^1\text{H}$ } NMR (101 MHz, DMSO- $d_6$ )  $\delta$  161.7, 147.0, 146.3, 126.5, 125.7, 64.2, 45.7, 22.5. **HRMS (ESI)**: call for  $\text{C}_8\text{H}_{12}\text{N}$  [M-I] $^+$ : 122.0964. Found: 122.0961.

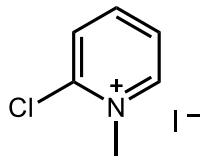

**2-chloro-1-methylpyridin-1-ium iodide (1ae)**: The substance was prepared using **General Procedure B**. Yellow solid (0.76 g, 60% yield).  $^1\text{H}$  NMR (400 MHz, DMSO- $d_6$ )  $\delta$  9.24 (dd,  $J = 6.2, 1.7$  Hz, 1H), 8.65 (dd,  $J = 8.0, 1.6$  Hz, 1H), 8.15 (td,  $J = 7.8, 1.7$  Hz, 1H), 8.07 (ddd,  $J = 7.7, 6.1, 1.6$  Hz, 1H), 4.41 (s, 3H).  $^{13}\text{C}$  { $^1\text{H}$ } NMR (101 MHz, DMSO- $d_6$ )  $\delta$  148.6, 144.5, 140.4, 127.3, 55.2. **HRMS (ESI)**: call for  $\text{C}_6\text{H}_7\text{ClN}$  [M-I] $^+$ : 128.0262. Found: 128.0262.

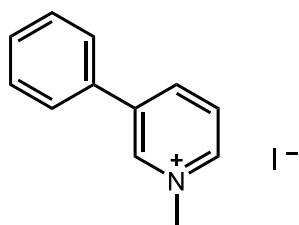

**1-methyl-3-phenylpyridin-1-ium iodide (1af)**: The substance was prepared using **General Procedure B**. Yellow solid (1.27 g, 86% yield).  $^1\text{H}$  NMR (400 MHz, DMSO- $d_6$ )  $\delta$  9.43 (s, 1H), 8.98 (d,  $J = 6.0$  Hz, 1H), 8.91 (d,  $J = 8.3$  Hz, 1H), 8.22 (dd,  $J = 8.2, 5.9$  Hz, 1H), 7.97 – 7.84 (m, 2H), 7.68 – 7.49 (m, 3H), 4.44 (s, 3H). Spectra matched literature values.<sup>[6]</sup>

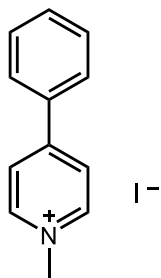

**1-methyl-4-phenylpyridin-1-ium iodide (1ag)**: The substance was prepared using **General Procedure B**. Brown solid (1.32 g, 89% yield).  $^1\text{H}$  NMR (400 MHz, DMSO- $d_6$ )  $\delta$  9.04 (d,  $J = 6.7$  Hz, 2H), 8.53 (d,  $J = 6.8$  Hz, 2H), 8.12 – 8.02 (m, 2H), 7.73 – 7.60 (m, 3H), 4.36 (s, 3H). Spectra matched literature values.<sup>[6]</sup>

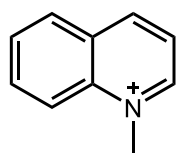

**1-methylquinolin-1-ium iodide (1ah)**: The substance was prepared using **General Procedure B**. Green solid (1.14 g, 84% yield).  $^1\text{H}$  NMR (400 MHz, DMSO- $d_6$ )  $\delta$  9.53 (d,  $J = 5.7$  Hz, 1H), 9.30 (d,  $J = 8.4$  Hz, 1H), 8.52 (dd,  $J = 12.2, 8.6$  Hz, 2H), 8.31 (ddd,  $J = 8.8, 7.0, 1.5$  Hz, 1H), 8.19 (dd,  $J = 8.4, 5.7$  Hz, 1H), 8.11 – 8.03 (m, 1H), 4.65 (s, 3H). Spectra matched literature values.<sup>[6]</sup>

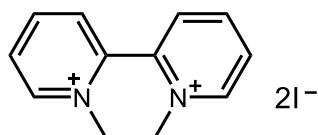

**1,1'-dimethyl-[2,2'-bipyridine]-1,1'-diium (1ai):** The substance was prepared using **General Procedure B**.

Yellow solid (1.41 g, 64% yield).  $^1\text{H NMR}$  (400 MHz,  $\text{DMSO-}d_6$ )  $\delta$  9.44 (d,  $J = 6.1$  Hz, 2H), 8.91 (t,  $J = 7.9$  Hz, 2H), 8.55 (d,  $J = 7.9$  Hz, 2H), 8.49 (t,  $J = 7.1$  Hz, 2H), 4.17 (s, 6H).  $^{13}\text{C}$   $\{^1\text{H}\}$  NMR (101 MHz,  $\text{DMSO-}d_6$ )  $\delta$  149.6, 147.1, 143.5, 131.1, 130.6, 48.2. **HRMS (ESI):** call for  $\text{C}_{12}\text{H}_{14}\text{N}_2$   $[\text{M-2I}]^{2+}$ : 186.1146. Found: 186.1148.

**1-methyl-2-((1-(4-phenoxyphenoxy)-propan-2-yl)oxy)pyridin-1-ium iodide (1aj):**

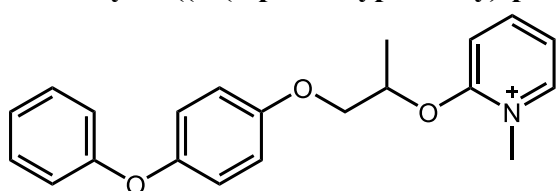

The substance was prepared using **General Procedure B**. Yellow solid (1.81 g, 78% yield).  $^1\text{H NMR}$  (400

MHz,  $\text{DMSO-}d_6$ )  $\delta$  8.70 (d,  $J = 6.3$  Hz, 1H), 8.52 (t,  $J = 8.3$  Hz, 1H), 7.96 (d,  $J = 8.9$  Hz, 1H), 7.58 (t,  $J = 6.8$  Hz, 1H), 7.36 (t,  $J = 7.7$  Hz, 2H), 7.11 – 6.87 (m, 7H), 5.60 – 5.48 (m, 1H), 4.44 – 4.25 (m, 2H), 3.96 (s, 3H), 1.55 (d,  $J = 6.2$  Hz, 3H).  $^{13}\text{C}$   $\{^1\text{H}\}$  NMR (101 MHz,  $\text{DMSO-}d_6$ )  $\delta$  159.5, 158.3, 154.7, 150.4, 148.0, 144.4, 130.4, 123.2, 121.2, 119.0, 117.9, 116.5, 113.1, 79.3, 70.9, 42.0, 16.4. **HRMS (ESI):** call for  $\text{C}_{21}\text{H}_{22}\text{NO}_3$   $[\text{M-I}]^+$ : 336.1594. Found: 336.1598.

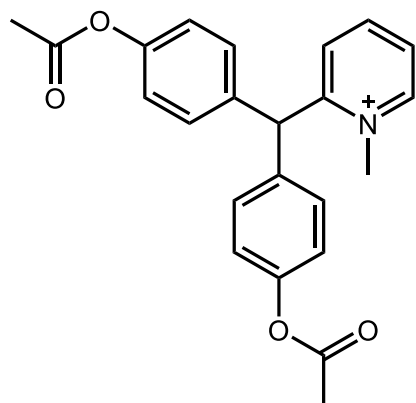

**2-(bis(4-acetoxyphenyl)methyl)-1-methylpyridin-1-ium iodide (1ak):** The substance

was prepared using **General Procedure B**. Yellow solid (2.04 g, 81% yield).  $^1\text{H NMR}$  (400 MHz,  $\text{DMSO-}d_6$ )  $\delta$  9.08 (d,  $J = 6.2$  Hz, 1H), 8.55 (t,  $J = 7.9$  Hz, 1H), 8.08 (t,  $J = 7.0$  Hz, 1H), 7.51 (d,  $J = 8.0$  Hz, 1H), 7.32 – 7.18 (m, 8H), 6.44 (s, 1H), 4.25 (s, 3H), 2.28 (s, 6H).  $^{13}\text{C}$   $\{^1\text{H}\}$  NMR (101 MHz,  $\text{DMSO-}d_6$ )  $\delta$  169.5, 158.5, 150.5, 148.5, 146.3, 135.8, 130.9, 129.3, 126.6, 123.1, 51.0, 46.5, 21.4. **HRMS (ESI):** call for  $\text{C}_{23}\text{H}_{22}\text{NO}_4$   $[\text{M-I}]^+$ : 376.1543. Found: 376.1548.

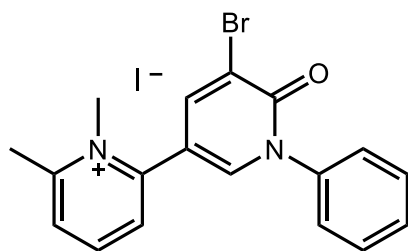

**5'-bromo-1-methyl-6'-oxo-1'-phenyl-1',6'-dihydro-[2,3'-bipyridin]-1-ium iodide (1al):**

The substance was prepared using **General Procedure B**. Yellow solid (1.36 g, 58% yield).

$^1\text{H NMR}$  (400 MHz,  $\text{DMSO-}d_6$ )  $\delta$  9.13 (d,  $J = 6.1$  Hz, 1H), 8.64 (t,  $J = 8.6$  Hz, 1H), 8.42 (d,  $J = 2.4$  Hz, 1H), 8.27 (d,  $J = 2.4$  Hz, 1H), 8.21 (d,  $J = 8.0$  Hz, 1H), 8.15 (t,  $J = 7.0$  Hz, 1H), 7.61 – 7.51 (m, 5H), 4.33 (s, 3H).  $^{13}\text{C}$   $\{^1\text{H}\}$   $\text{NMR}$  (101 MHz,  $\text{DMSO-}d_6$ )  $\delta$  157.6, 150.8, 147.2, 145.8, 142.3, 142.1, 140.6, 131.0, 129.7, 129.5, 127.4, 127.3, 116.0, 110.9, 47.4. **HRMS (ESI):** call for  $\text{C}_{17}\text{H}_{14}\text{BrN}_2\text{O} [\text{M-I}]^+$ : 341.0284. Found: 341.0285.

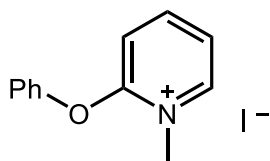

**1-methyl-2-phenoxy-pyridin-1-ium iodide (1am):**

The substance was prepared using **General Procedure B**. White solid (1.25g, 80%).  $^1\text{H NMR}$  (400 MHz,  $\text{DMSO-}d_6$ )  $\delta$  8.86 (d,  $J = 6.3$  Hz, 1H), 8.41 (t,  $J = 8.1$  Hz, 1H), 7.67 (dt,  $J = 23.9, 7.3$  Hz, 6H), 7.56 – 7.41 (m, 5H), 7.14 (d,  $J = 8.8$  Hz, 2H), 4.23 (s, 3H). Spectra matched literature values.<sup>[6]</sup>

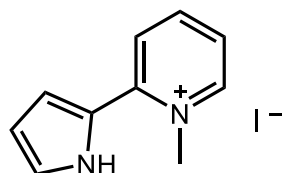

**1-methyl-2-(1H-pyrrol-2-yl)pyridin-1-ium iodide (1ao):**

The substance was prepared using **General Procedure B**. Yellow solid (0.12 g, 84%).  $^1\text{H NMR}$  (400 MHz,  $\text{DMSO-}d_6$ )  $\delta$  12.21 (s, 1H), 8.90 (dd,  $J = 6.4, 1.5$  Hz, 1H), 8.47 (ddd,  $J = 8.8, 7.5, 1.5$  Hz, 1H), 8.14 (dd,  $J = 8.5, 1.6$  Hz, 1H), 7.81 (ddd,  $J = 7.6, 6.3, 1.5$  Hz, 1H), 7.42 (dd,  $J = 2.5, 1.4$  Hz, 1H), 7.13 (dd,  $J = 3.9, 1.4$  Hz, 1H), 6.48 (dd,  $J = 3.9, 2.6$  Hz, 1H), 4.37 (s, 3H). Spectra matched literature values.<sup>[12]</sup>

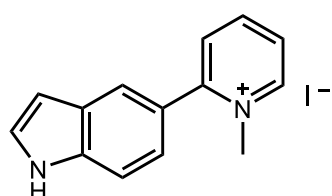

**2-(1H-indol-5-yl)-1-methylpyridin-1-ium iodide (1ap):**

The substance was prepared using **General Procedure B**. Yellow solid (1.2 g, 89%).  $^1\text{H NMR}$  (400 MHz,  $\text{DMSO-}d_6$ )  $\delta$  11.57 (s, 1H), 9.12 (d,  $J = 6.1$  Hz, 1H), 8.60 (t,  $J = 7.8$  Hz, 1H), 8.11 (t,  $J = 6.9$  Hz, 2H), 7.90 (d,  $J = 1.7$  Hz, 1H), 7.65 (d,  $J = 8.5$  Hz, 1H), 7.57 (t,  $J = 2.8$  Hz, 1H), 7.39 (dd,  $J = 8.5, 1.8$  Hz, 1H), 6.62 (t,  $J = 2.5$  Hz, 1H), 4.19 (s, 3H).  $^{13}\text{C}$   $\{^1\text{H}\}$   $\text{NMR}$  (101 MHz,  $\text{DMSO-}d_6$ )  $\delta$  157.4, 146.9, 145.3, 137.2, 130.7, 128.1, 127.9,

126.2, 122.8, 122.5, 122.1, 112.5, 102.6, 47.6. **HRMS (ESI):** call for  $C_{14}H_{13}N_2[M-I]^+$ : 209.1073. Found: 209.1079.

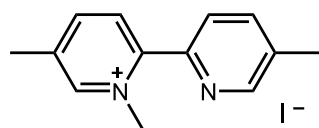

**1,5,5'-trimethyl-[2,2'-bipyridin]-1-ium iodide (1aq):** The substance was prepared using **General Procedure B**. Yellow solid (1.23 g, 73%).  $^1H$  NMR (400 MHz, DMSO- $d_6$ )  $\delta$  9.11 (s, 1H), 8.70 (s, 1H), 8.58 – 8.51 (m, 1H), 8.16 (d,  $J$  = 8.1 Hz, 1H), 7.98 (dd,  $J$  = 8.1, 2.2 Hz, 1H), 7.84 (d,  $J$  = 8.0 Hz, 1H), 4.24 (s, 3H), 2.56 (s, 3H), 2.45 (s, 3H).  $^{13}C$  { $^1H$ } NMR (101 MHz, DMSO- $d_6$ )  $\delta$  150.6, 150.4, 147.5, 147.4, 146.5, 138.6, 138.3, 136.2, 129.5, 126.1, 47.5, 18.4, 18.1. **HRMS (ESI):** call for  $C_{13}H_{15}N_2[M-I]^+$ : 199.1230. Found: 199.1231.

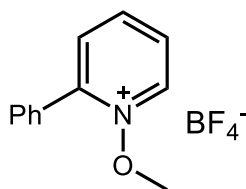

**1-methoxy-2-phenylpyridin-1-ium tetrafluoroborate (1ar):** White solid (0.68g, 50%).  $^1H$  NMR (400 MHz, DMSO- $d_6$ )  $\delta$  9.58 (dd,  $J$  = 6.7, 1.3 Hz, 1H), 8.68 (td,  $J$  = 7.8, 1.3 Hz, 1H), 8.32 (dd,  $J$  = 8.0, 1.8 Hz, 1H), 8.27 (ddd,  $J$  = 7.7, 6.6, 1.9 Hz, 1H), 7.87 – 7.83 (m, 2H), 7.75 – 7.65 (m, 3H), 4.09 (s, 3H). Spectra matched literature values.<sup>[12]</sup>

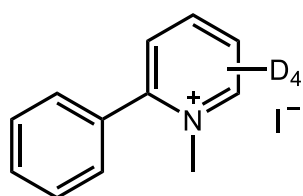

**1-methyl-2-phenylpyridin-1-ium-3,4,5,6-d4 iodide (1a - D4):** The substance was prepared using **General Procedure C**. Light yellow solid (1.21 g, 80% yield).  $^1H$  NMR (400 MHz, DMSO- $d_6$ )  $\delta$  7.71 - 7.63 (m, 5H), 4.13 (s, 3H). Spectra matched literature values.<sup>[11]</sup>

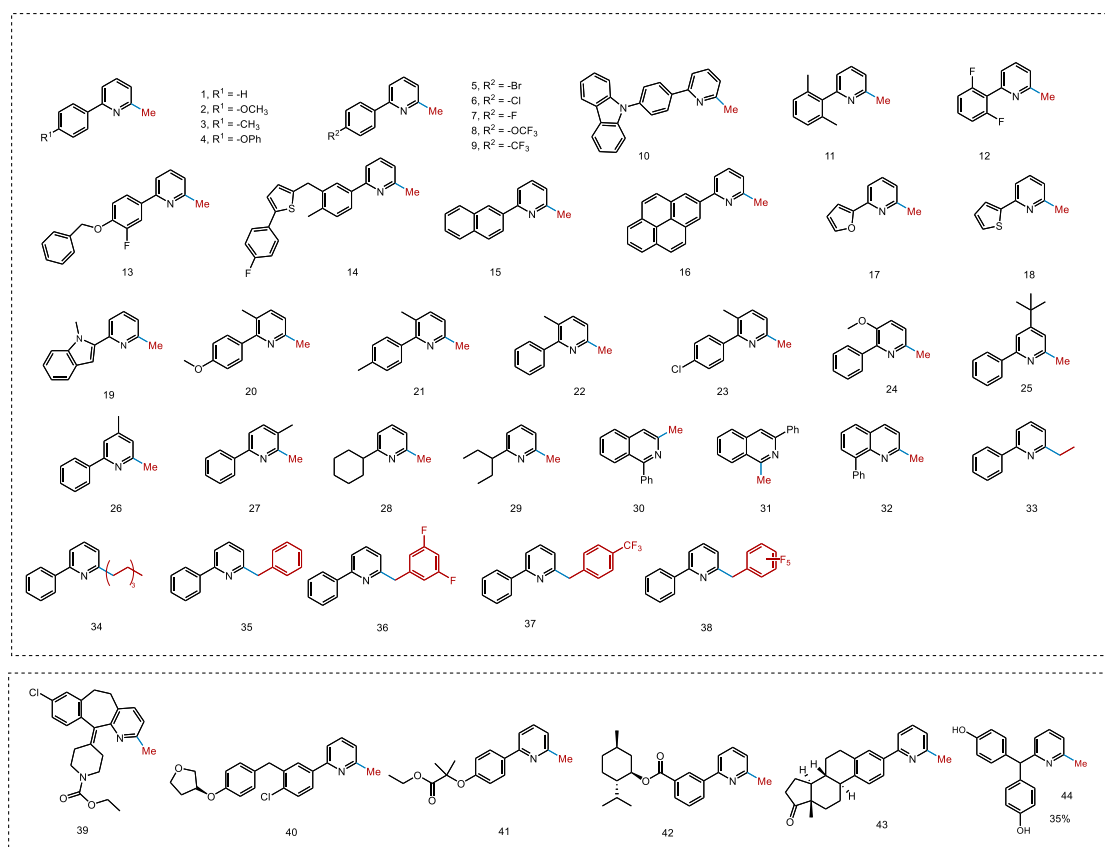

**Figure S7.** Characterization data of the products

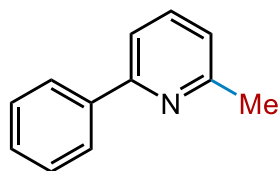

**2-methyl-6-phenylpyridine (1):** A colorless oil (36.9 mg, 87% yield). <sup>1</sup>H NMR (400 MHz, Chloroform-*d*) δ 8.03 – 7.93 (m, 2H), 7.63 (t, *J* = 7.8 Hz, 1H), 7.52 (d, *J* = 7.8 Hz, 1H), 7.51 – 7.42 (m, 2H), 7.43 – 7.37 (m, 1H), 7.10 (d, *J* = 7.6 Hz, 1H), 2.64 (s, 3H). Spectra matched literature values.<sup>[13]</sup>

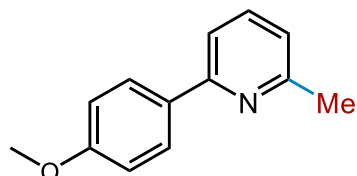

**2-(4-methoxyphenyl)-6-methylpyridine (2):** A pale yellow solid (36.9 mg, 74% yield). <sup>1</sup>H NMR (400 MHz, Chloroform-*d*) δ 7.98 – 7.89 (m, 2H), 7.59 (t, *J* = 7.7 Hz, 1H), 7.45 (d, *J* = 7.8 Hz, 1H), 7.03 (d, *J* = 7.5 Hz, 1H), 7.01 – 6.96 (m, 2H), 3.86 (s, 3H), 2.61 (s, 3H). Spectra matched literature values.<sup>[14]</sup>

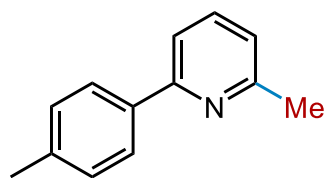

**2-methyl-6-(p-tolyl)pyridine (3):** A colorless oil (24.1 mg, 54% yield).  $^1\text{H NMR}$  (400 MHz, Chloroform-*d*)  $\delta$  7.92 – 7.85 (m, 2H), 7.61 (t,  $J = 7.7$  Hz, 1H), 7.49 (d,  $J = 7.8$  Hz, 1H), 7.27 (d,  $J = 8.1$  Hz, 2H), 7.06 (d,  $J = 7.6$  Hz, 1H), 2.62 (s, 3H), 2.41 (s, 3H). Spectra matched literature values.<sup>[14]</sup>

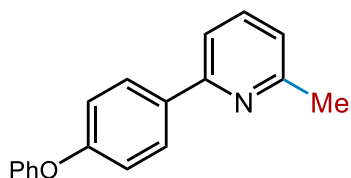

**2-methyl-6-(4-phenoxyphenyl)pyridine (4):** A colorless oil (29.1 mg, 46% yield).  $^1\text{H NMR}$  (400 MHz, Chloroform-*d*)  $\delta$  8.00 – 7.94 (m, 2H), 7.62 (t,  $J = 7.7$  Hz, 1H), 7.48 (d,  $J = 7.8$  Hz, 1H), 7.41 – 7.31 (m, 2H), 7.16 – 7.02 (m, 6H), 2.63 (s, 3H). Spectra matched literature values.<sup>[14]</sup>

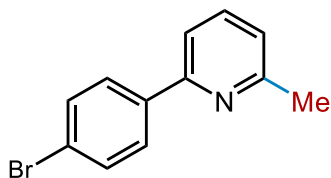

**2-(4-bromophenyl)-6-methylpyridine (5):** A white solid (25.0 mg, 43% yield).  $^1\text{H NMR}$  (400 MHz, Chloroform-*d*)  $\delta$  7.90 – 7.84 (m, 2H), 7.66 – 7.56 (m, 3H), 7.49 (d,  $J = 7.8$  Hz, 1H), 7.11 (d,  $J = 7.5$  Hz, 1H), 2.62 (s, 3H). Spectra matched literature values.<sup>[14]</sup>

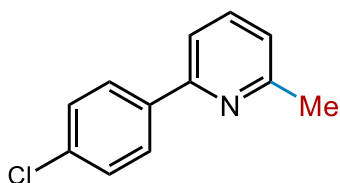

**2-(4-chlorophenyl)-6-methylpyridine (6):** A white solid (20.7 mg, 44% yield).  $^1\text{H NMR}$  (400 MHz, Chloroform-*d*)  $\delta$  7.97 – 7.90 (m, 2H), 7.63 (t,  $J = 7.7$  Hz, 1H), 7.48 (d,  $J = 7.8$  Hz, 1H), 7.44 – 7.40 (m, 2H), 7.10 (d,  $J = 7.6$  Hz, 1H), 2.62 (s, 3H). Spectra matched literature values.<sup>[14]</sup>

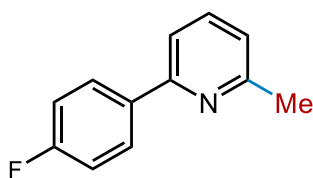

**2-(4-fluorophenyl)-6-methylpyridine (7):** A white solid (23.2 mg, 54% yield).  $^1\text{H NMR}$  (400 MHz, Chloroform-*d*)  $\delta$  8.01 – 7.93 (m, 2H), 7.62 (t,  $J = 7.7$  Hz, 1H), 7.46 (d,  $J = 7.8$  Hz, 1H), 7.17 – 7.11 (m, 2H), 7.09 (d,  $J = 7.6$  Hz, 1H), 2.62 (s, 3H). Spectra matched literature values.<sup>[14]</sup>

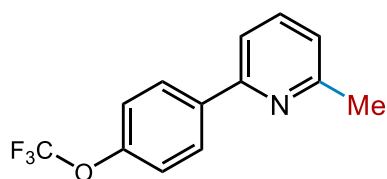

**2-methyl-6-(4-(trifluoromethoxy)phenyl)pyridine (8):** A white solid (20.0 mg, 32% yield).  $^1\text{H NMR}$  (400 MHz, Chloroform-*d*)  $\delta$  8.06 – 7.96 (m, 2H), 7.64 (t,  $J$

= 7.7 Hz, 1H), 7.49 (d,  $J = 7.8$  Hz, 1H), 7.30 (d,  $J = 7.9$  Hz, 2H), 7.12 (d,  $J = 7.6$  Hz, 1H), 2.62 (s, 3H). Spectra matched literature values.<sup>[14]</sup>

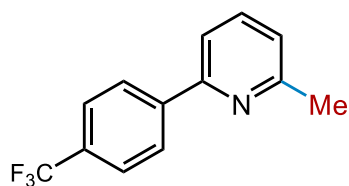

**2-methyl-6-(4-(trifluoromethyl)phenyl)pyridine (9):** A white solid (17.5 mg, 30% yield).  $^1\text{H NMR}$  (400 MHz, Chloroform- $d$ )  $\delta$  8.10 (d,  $J = 6.8$  Hz, 2H), 7.73 – 7.67 (m, 3H), 7.55 (d,  $J = 7.8$  Hz, 1H), 7.16 (d,  $J = 7.6$  Hz, 1H),

2.64 (s, 3H). Spectra matched literature values.<sup>[13]</sup>

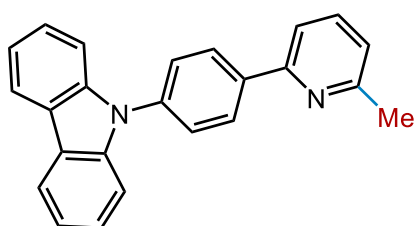

**9-(4-(6-methylpyridin-2-yl)phenyl)-9H-carbazole (10):** A colorless oil (21.2 mg, 46% yield).  $^1\text{H NMR}$  (400 MHz, Chloroform- $d$ )  $\delta$  8.22 (d,  $J = 8.7$  Hz, 2H), 8.17 (d,  $J = 7.8$  Hz, 2H), 7.75 – 7.65 (m, 3H), 7.62 (d,  $J = 7.8$  Hz, 1H), 7.51 – 7.38

(m, 4H), 7.31 (t,  $J = 7.3$  Hz, 2H), 7.17 (d,  $J = 7.6$  Hz, 1H), 2.68 (s, 3H).  $^{13}\text{C} \{^1\text{H}\}$  NMR (101 MHz, DMSO- $d_6$ )  $\delta$  157.6, 155.1, 139.8, 137.9, 137.1, 136.1, 127.5, 126.2, 125.0, 122.4, 120.9, 119.3, 119.0, 116.6, 108.8, 23.8. **HRMS (ESI):** call for  $\text{C}_{24}\text{H}_{18}\text{N}_2$  [ $\text{M}+\text{H}$ ] $^+$ : 335.1543. Found: 335.1519.

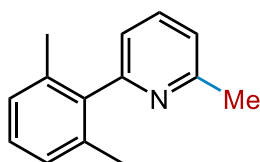

**2-(2,6-dimethylphenyl)-6-methylpyridine (11):** A colorless oil (23.1 mg, 47% yield).  $^1\text{H NMR}$  (400 MHz, Chloroform- $d$ )  $\delta$  7.64 (t,  $J = 7.7$  Hz, 1H), 7.17 (dd,  $J = 8.4, 6.6$  Hz, 1H), 7.12 –

7.08 (m, 3H), 7.02 (d,  $J = 7.6$  Hz, 1H), 2.61 (s, 3H), 2.05 (s, 6H). Spectra matched literature values.<sup>[15]</sup>

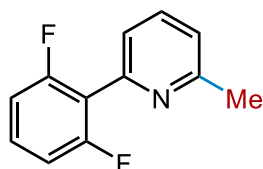

**2-(2,6-difluorophenyl)-6-methylpyridine (12):** A white solid (20.4 mg, 40% yield).  $^1\text{H NMR}$  (400 MHz, Chloroform- $d$ )  $\delta$  7.66 (t,  $J = 7.7$  Hz, 1H), 7.58 – 7.49 (m, 2H), 7.47 (d,  $J = 7.8$  Hz, 1H), 7.15 (d,  $J = 7.6$  Hz, 1H), 6.83 (tt,  $J = 8.7, 2.4$  Hz, 1H),

2.62 (s, 3H).  $^{19}\text{F NMR}$  (376 MHz, Chloroform- $d$ )  $\delta$  -109.79.  $^{13}\text{C} \{^1\text{H}\}$  NMR (101 MHz, Chloroform- $d$ )  $\delta$  163.4 (dd,  $J_{\text{CF}} = 242.4$  Hz), 158.7, 154.2, 143.1 (t,  $J = 9.3$  Hz), 137.2,

122.8, 117.6, 110.0 – 109.5 (m), 103.9 (t,  $J_{CF} = 25.6$  Hz), 24.7. **HRMS (ESI):** call for  $C_{12}H_9F_2N$   $[M+H]^+$ : 206.0776. Found: 206.0761.

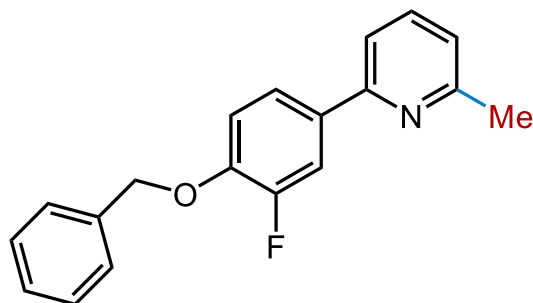

**2-(4-(benzyloxy)-3-fluorophenyl)-6-methylpyridine (13):** A white solid (42.8 mg, 58% yield).  $^1H$  NMR (400 MHz, Chloroform-*d*)  $\delta$  7.77 (dd,  $J = 8.3, 2.1$  Hz, 1H), 7.62 (t,  $J = 7.7$  Hz, 1H), 7.51 – 7.47 (m, 2H), 7.41 (dd,  $J = 14.1, 7.3$  Hz, 3H), 7.37 –

7.31 (m, 1H), 7.17 (dd,  $J = 10.9, 8.4$  Hz, 1H), 7.09 (d,  $J = 7.6$  Hz, 1H), 5.24 (s, 2H), 2.63 (s, 3H).  $^{13}C$   $\{^1H\}$  NMR (101 MHz, Chloroform-*d*)  $\delta$  157.3, 154.8, 152.5 (d,  $J_{CF} = 252.5$  Hz), 145.9 (d,  $J_{CF} = 11.0$  Hz), 135.9, 135.5, 135.3 (d,  $J_{CF} = 3.6$  Hz), 127.6, 127.1, 126.7, 120.6, 119.0 (d,  $J_{CF} = 7.1$  Hz), 116.3, 115.3 (d,  $J_{CF} = 18.8$  Hz), 113.3 (d,  $J_{CF} = 2.2$  Hz), 70.3, 23.7. **HRMS (ESI):** call for  $C_{19}H_{16}FNO$   $[M+H]^+$ : 294.1289. Found: 294.1287.

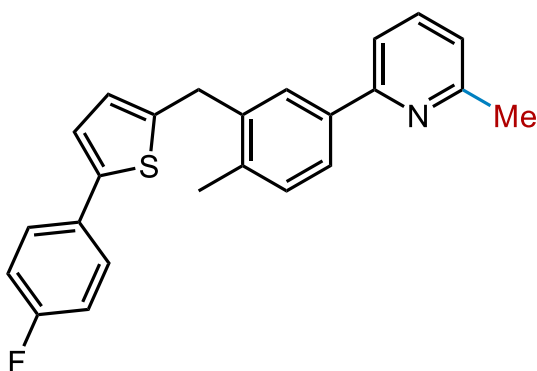

**2-(3-((5-(4-fluorophenyl)thiophen-2-yl)methyl)-4-methylphenyl)-6-methylpyridine (14):** A white solid (55.9 mg, 60% yield).  $^1H$  NMR (400 MHz, DMSO-*d*<sub>6</sub>)  $\delta$  8.00 (d,  $J = 2.0$  Hz, 1H), 7.88 (dd,  $J = 7.9, 2.0$  Hz, 1H), 7.77 – 7.67 (m, 2H), 7.63 – 7.52 (m, 2H),

7.33 – 7.24 (m, 2H), 7.23 – 7.12 (m, 3H), 6.84 (d,  $J = 3.6$  Hz, 1H), 4.23 (s, 2H), 2.52 (s, 3H), 2.33 (s, 3H).  $^{19}F$  NMR (376 MHz, DMSO-*d*<sub>6</sub>)  $\delta$  -115.02.  $^{13}C$   $\{^1H\}$  NMR (101 MHz, DMSO-*d*<sub>6</sub>)  $\delta$  161.9 (d,  $J_{CF} = 252.5$  Hz), 158.1, 155.7, 144.1, 140.8, 139.1, 137.8, 137.4 (d,  $J_{CF} = 15.5$  Hz), 131.2, 131.0 (d,  $J_{CF} = 3.2$  Hz), 128.0, 127.4 (d,  $J_{CF} = 8.1$  Hz), 126.9, 125.4, 123.9, 122.1, 117.4, 116.4, 116n.2, 34.0, 24.8, 19.3. **HRMS (ESI):** call for  $C_{24}H_{20}FNS$   $[M+H]^+$ : 374.1373. Found: 374.1375.

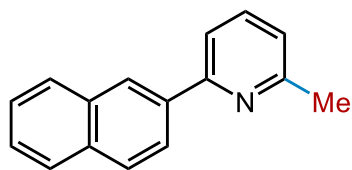

**2-methyl-6-(naphthalen-2-yl)pyridine (15):** A white solid (44.3 mg, 81% yield).  $^1\text{H NMR}$  (400 MHz, Chloroform-*d*)  $\delta$  8.10 – 8.02 (m, 1H), 7.96 – 7.85 (m, 2H), 7.71 (t,  $J = 7.7$  Hz, 1H), 7.63 – 7.51 (m, 2H), 7.52 – 7.44 (m, 2H), 7.37 (d,  $J = 7.6$  Hz, 1H), 7.21 (d,  $J = 7.7$  Hz, 1H), 2.68 (s, 3H). Spectra matched literature values.<sup>[14]</sup>

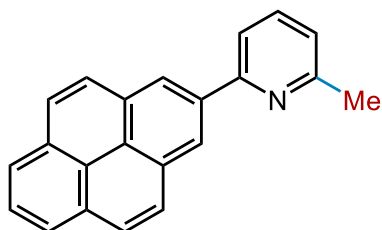

**2-methyl-6-(pyren-2-yl)pyridine (16):** A white solid (50.1 mg, 69% yield).  $^1\text{H NMR}$  (400 MHz, Chloroform-*d*)  $\delta$  8.37 (d,  $J = 9.3$  Hz, 1H), 8.26 (d,  $J = 7.9$  Hz, 1H), 8.24 – 8.13 (m, 3H), 8.11 (s, 2H), 8.07 (d,  $J = 9.3$  Hz, 1H), 8.02 (t,  $J = 7.6$  Hz, 1H), 7.77 (t,  $J = 7.7$  Hz, 1H), 7.51 (d,  $J = 7.7$  Hz, 1H), 7.25 (d,  $J = 7.9$  Hz, 1H), 2.74 (s, 3H).  $^{13}\text{C} \{^1\text{H}\}$  NMR (101 MHz, Chloroform-*d*)  $\delta$  158.9, 158.5, 136.5, 136.1, 131.4, 131.3, 131.0, 128.7, 127.9, 127.8, 127.6, 127.5, 126.0, 125.3, 125.1, 125.0, 125.0, 124.9, 124.8, 122.8, 121.5, 24.9. **HRMS (ESI):** call for  $\text{C}_{22}\text{H}_{15}\text{N}$   $[\text{M}+\text{H}]^+$ : 294.1277. Found: 294.1266.

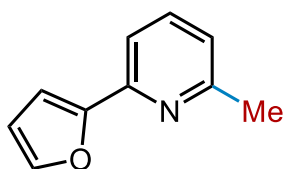

**2-(furan-2-yl)-6-methylpyridine (17):** A colorless oil (18.9 mg, 48% yield).  $^1\text{H NMR}$  (400 MHz, Chloroform-*d*)  $\delta$  7.59 (t,  $J = 7.7$  Hz, 1H), 7.52 (d,  $J = 1.0$  Hz, 1H), 7.48 (d,  $J = 7.8$  Hz, 1H), 7.05 – 6.95 (m, 2H), 6.51 (dd,  $J = 3.4, 1.8$  Hz, 1H), 2.59 (s, 3H). Spectra matched literature values.<sup>[16]</sup>

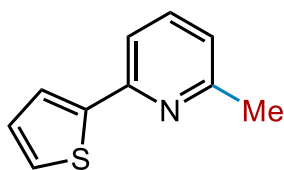

**2-methyl-6-(thiophen-2-yl)pyridine (18):** A colorless oil (27.2 mg, 62% yield).  $^1\text{H NMR}$  (400 MHz, Chloroform-*d*)  $\delta$  7.58 – 7.52 (m, 2H), 7.45 (d,  $J = 7.9$  Hz, 1H), 7.37 (dd,  $J = 5.1, 1.1$  Hz, 1H), 7.10 (dd,  $J = 5.1, 3.6$  Hz, 1H), 7.00 (d,  $J = 7.6$  Hz, 1H), 2.58 (s, 3H).  $^{13}\text{C} \{^1\text{H}\}$  NMR (101 MHz, Chloroform-*d*)  $\delta$  157.4, 150.9, 144.2, 135.7, 126.9, 126.1, 123.3, 120.4, 114.8, 23.5. **HRMS (ESI):** call for  $\text{C}_{10}\text{H}_9\text{NS}$   $[\text{M}+\text{H}]^+$ : 176.0528. Found: 176.0515.

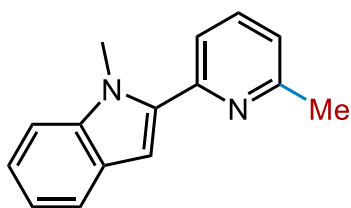

**1-methyl-2-(6-methylpyridin-2-yl)-1H-indole (19):** A yellow solid (27.6 mg, 50% yield).  $^1\text{H NMR}$  (400 MHz, Chloroform-*d*)  $\delta$  7.52 – 7.44 (m, 2H), 7.35 (d,  $J = 7.8$  Hz, 1H), 7.25 (d,  $J = 8.3$  Hz, 1H), 7.15 – 7.08 (m, 1H), 7.01 – 6.91 (m, 2H), 6.68 (s, 1H), 3.92 (s, 3H), 2.48 (s, 3H).  $^{13}\text{C} \{^1\text{H}\}$  NMR (101 MHz, Chloroform-*d*)  $\delta$  157.8, 151.9, 139.3, 139.3, 136.8, 127.6, 122.4, 121.3, 120.9, 120.6, 119.8, 109.9, 103.3, 31.9, 24.7. **HRMS (ESI):** call for  $\text{C}_{15}\text{H}_{14}\text{N}_2$   $[\text{M}+\text{H}]^+$ : 222.1157. Found: 222.1162.

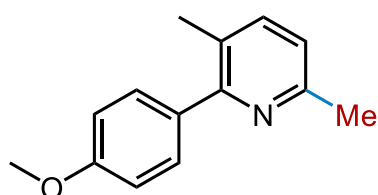

**2-(4-methoxyphenyl)-3,6-dimethylpyridine (20):** A colorless oil (44.3 mg, 84% yield).  $^1\text{H NMR}$  (400 MHz, Chloroform-*d*)  $\delta$  7.51 – 7.39 (m, 3H), 7.05 – 6.91 (m, 3H), 3.84 (s, 3H), 2.55 (s, 3H), 2.29 (s, 3H). Spectra matched literature values.<sup>[16]</sup>

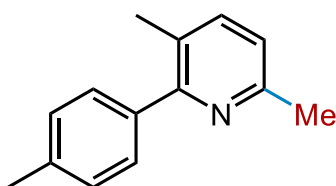

**3,6-dimethyl-2-(p-tolyl)pyridine (21):** A colorless oil (44.3 mg, 63% yield).  $^1\text{H NMR}$  (400 MHz, Chloroform-*d*)  $\delta$  7.44 (d,  $J = 7.7$  Hz, 1H), 7.42 – 7.35 (m, 2H), 7.29 – 7.21 (m, 2H), 7.02 (d,  $J = 7.8$  Hz, 1H), 2.56 (s, 3H), 2.40 (s, 3H), 2.29 (s, 3H).  $^{13}\text{C} \{^1\text{H}\}$  NMR (101 MHz, Chloroform-*d*)  $\delta$  158.0, 155.3, 138.7, 138.0, 137.4, 128.9, 128.8, 127.4, 121.5, 24.2, 21.3, 19.7. **HRMS (ESI):** call for  $\text{C}_{14}\text{H}_{15}\text{N}$   $[\text{M}+\text{H}]^+$ : 198.1283. Found: 198.1267.

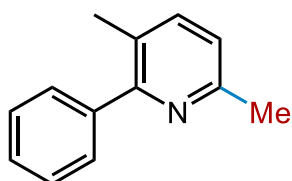

**3,6-dimethyl-2-phenylpyridine (22):** A colorless oil (24.0 mg, 52% yield).  $^1\text{H NMR}$  (400 MHz, Chloroform-*d*)  $\delta$  7.52 – 7.40 (m, 5H), 7.40 – 7.34 (m, 1H), 7.04 (d,  $J = 7.8$  Hz, 1H), 2.57 (s, 3H), 2.28 (s, 3H). Spectra matched literature values.<sup>[17]</sup>

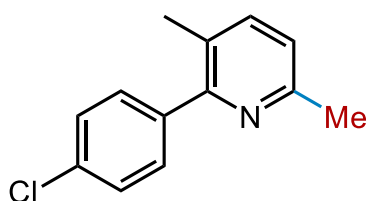

**2-(4-chlorophenyl)-3,6-dimethylpyridine (23):** A white solid (23.5 mg, 43% yield).  $^1\text{H NMR}$  (400 MHz, Chloroform-*d*)  $\delta$  7.48 – 7.42 (m, 3H), 7.42 – 7.38 (m, 2H), 7.05 (d,  $J = 7.8$  Hz, 1H), 2.56 (s, 3H), 2.27 (s, 3H).

$^{13}\text{C}$   $\{^1\text{H}\}$  NMR (101 MHz, Chloroform-*d*)  $\delta$  156.7, 155.6, 139.3, 139.0, 133.8, 130.4, 128.4, 127.5, 122.0, 24.2, 19.5. **HRMS (ESI)**: call for  $\text{C}_{13}\text{H}_{12}\text{ClN}$   $[\text{M}+\text{H}]^+$ : 218.0731. Found: 218.0718.

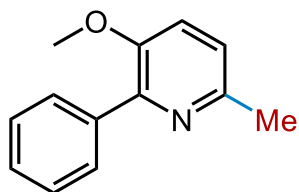

**3-methoxy-6-methyl-2-phenylpyridine (24)**: A colorless oil (44.2 mg, 89% yield).  $^1\text{H}$  NMR (400 MHz, Chloroform-*d*)  $\delta$  7.91 – 7.84 (m, 2H), 7.47 – 7.40 (m, 2H), 7.40 – 7.32 (m, 1H), 7.20 (d,  $J = 8.4$  Hz, 1H), 7.07 (d,  $J = 8.4$  Hz, 1H), 3.82 (s, 3H), 2.56 (s, 3H).  $^{13}\text{C}$   $\{^1\text{H}\}$  NMR (101 MHz, Chloroform-*d*)  $\delta$  151.5, 149.7, 147.2, 137.9, 129.4, 128.1, 128.0, 122.3, 119.3, 55.7, 23.6. **HRMS (ESI)**: call for  $\text{C}_{13}\text{H}_{13}\text{NO}$   $[\text{M}+\text{H}]^+$ : 200.1070. Found: 200.1059.

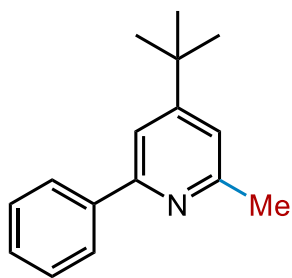

**4-(tert-butyl)-2-methyl-6-phenylpyridine (25)**: A colorless oil (34.4 mg, 61% yield).  $^1\text{H}$  NMR (400 MHz, Chloroform-*d*)  $\delta$  7.99 – 7.94 (m, 2H), 7.52 – 7.43 (m, 3H), 7.43 – 7.36 (m, 1H), 7.11 (d,  $J = 1.6$  Hz, 1H), 2.63 (s, 3H), 1.36 (s, 9H).  $^{13}\text{C}$   $\{^1\text{H}\}$  NMR (101 MHz, Chloroform-*d*)  $\delta$  159.8, 157.1, 156.1, 139.4, 127.6, 127.4, 126.1, 117.7, 114.1, 33.7, 29.6, 23.9. **HRMS (ESI)**: call for  $\text{C}_{16}\text{H}_{19}\text{N}$   $[\text{M}+\text{H}]^+$ : 226.1590. Found: 226.1583.

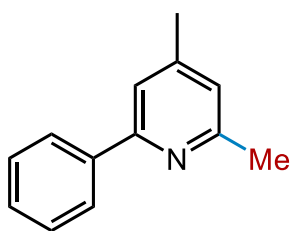

**2,4-dimethyl-6-phenylpyridine (26)**: A colorless oil (24.0 mg, 34% yield).  $^1\text{H}$  NMR (400 MHz, Chloroform-*d*)  $\delta$  8.00 – 7.91 (m, 2H), 7.50 – 7.42 (m, 2H), 7.41 – 7.36 (m, 1H), 7.34 (s, 1H), 6.94 (s, 1H), 2.59 (s, 3H), 2.37 (s, 3H).  $^{13}\text{C}$   $\{^1\text{H}\}$  NMR (101 MHz, Chloroform-*d*)  $\delta$  157.1, 155.9, 146.7, 138.9, 127.6, 127.5, 126.0, 121.6, 117.8, 23.5, 20.1. **HRMS (ESI)**: call for  $\text{C}_{13}\text{H}_{13}\text{N}$   $[\text{M}+\text{H}]^+$ : 184.1121. Found: 184.1109.

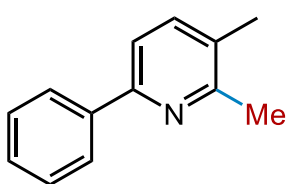

**2,3-dimethyl-6-phenylpyridine (27)**: A colorless oil (9.5 mg, 21% yield).  $^1\text{H}$  NMR (400 MHz, Chloroform-*d*)  $\delta$  7.99 – 7.94 (m, 2H), 7.48 – 7.42 (m, 4H), 7.40 – 7.34 (m, 1H), 2.58 (s, 3H), 2.32 (s, 3H). Spectra matched literature values.<sup>[18]</sup>

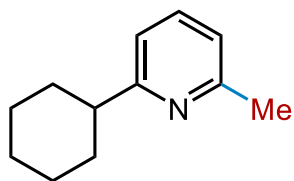

**2-cyclohexyl-6-methylpyridine (28):** A colorless oil (23.4 mg, 53% yield).  $^1\text{H NMR}$  (400 MHz, Chloroform-*d*)  $\delta$  7.48 (t,  $J = 7.7$  Hz, 1H), 6.94 (d,  $J = 7.1$  Hz, 2H), 2.70 – 2.63 (m, 1H), 2.52 (s, 3H), 1.99 – 1.92 (m, 2H), 1.87 – 1.80 (m, 2H), 1.77 – 1.71 (m, 1H), 1.51 – 1.36 (m, 4H), 1.32 – 1.24 (m, 1H). Spectra matched literature values.<sup>[18]</sup>

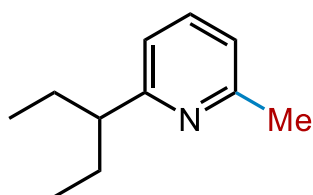

**2-methyl-6-(pentan-3-yl)pyridine (29):** A colorless oil (14.0 mg, 34% yield).  $^1\text{H NMR}$  (400 MHz, Chloroform-*d*)  $\delta$  7.46 (t,  $J = 7.7$  Hz, 1H), 6.93 (d,  $J = 7.5$  Hz, 1H), 6.88 (d,  $J = 7.7$  Hz, 1H), 2.52 (s, 4H), 1.72 – 1.63 (m, 4H), 0.78 (t,  $J = 7.4$  Hz, 6H).  $^{13}\text{C}$   $\{^1\text{H}\}$  NMR (101 MHz, Chloroform-*d*)  $\delta$  163.7, 156.5, 135.1, 119.4, 117.8, 50.4, 27.1, 23.7, 11.0. **HRMS (ESI):** call for  $\text{C}_{11}\text{H}_{17}\text{N}$   $[\text{M}+\text{H}]^+$ : 164.1434. Found: 164.1421.

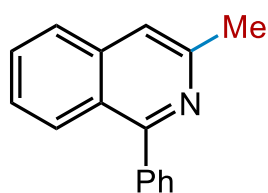

**3-methyl-1-phenylisoquinoline (30):** A white solid (38.6 mg, 71% yield).  $^1\text{H NMR}$  (400 MHz, Chloroform-*d*)  $\delta$  8.01 (d,  $J = 8.5$  Hz, 1H), 7.78 (d,  $J = 8.3$  Hz, 1H), 7.70 – 7.66 (m, 2H), 7.65 – 7.58 (m, 1H), 7.56 – 7.47 (m, 4H), 7.46 – 7.40 (m, 1H), 2.76 (s, 3H). Spectra matched literature values.<sup>[19]</sup>

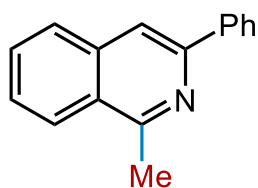

**1-methyl-3-phenylisoquinoline (31):** A white solid (10.5 mg, 19% yield).  $^1\text{H NMR}$  (400 MHz, Chloroform-*d*)  $^1\text{H NMR}$  (400 MHz,  $\text{CDCl}_3$ )  $\delta$  8.18 – 8.10 (m, 3H), 7.93 (s, 1H), 7.86 (d,  $J = 8.1$  Hz, 1H), 7.67 (t,  $J = 7.0$  Hz, 1H), 7.57 (t,  $J = 7.0$  Hz, 1H), 7.50 (t,  $J = 7.6$  Hz, 2H), 7.40 (t,  $J = 7.3$  Hz, 1H), 3.05 (s, 3H). Spectra matched literature values.<sup>[20]</sup>

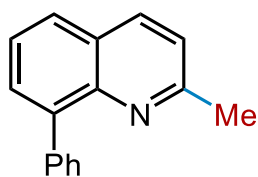

**2-methyl-8-phenylquinoline (32):** A colorless oil (9.5 mg, 17% yield).  $^1\text{H NMR}$  (400 MHz, Chloroform-*d*)  $^1\text{H NMR}$  (400 MHz,  $\text{CDCl}_3$ )  $\delta$  8.08 (d,  $J = 8.4$  Hz, 1H), 7.82 – 7.75 (m, 3H), 7.72 (dd,  $J = 7.2, 1.5$  Hz, 1H), 7.58 – 7.44 (m, 3H),

7.43 – 7.38 (m, 1H), 7.29 (d,  $J = 8.4$  Hz, 1H), 2.69 (s, 3H).  $^{13}\text{C}$   $\{^1\text{H}\}$  NMR (101 MHz, Chloroform- $d$ )  $\delta$  157.7, 144.4, 138.8, 138.5, 135.2, 130.0, 129.2, 126.7, 126.2, 126.1, 125.9, 124.3, 120.8, 24.7. **HRMS (ESI)**: call for  $\text{C}_{16}\text{H}_{13}\text{N}$   $[\text{M}+\text{H}]^+$ : 220.1121. Found: 220.1120.

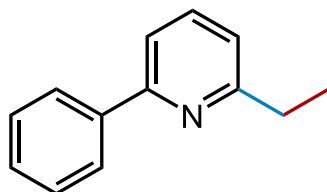

**2-ethyl-6-phenylpyridine (33)**: A colorless oil (24.1 mg, 53% yield).  $^1\text{H}$  NMR (400 MHz, Chloroform- $d$ )  $\delta$  8.06 – 7.98 (m, 2H), 7.66 (t,  $J = 7.7$  Hz, 1H), 7.54 (d,  $J = 7.8$  Hz, 1H), 7.52 – 7.43 (m, 2H), 7.44 – 7.36 (m, 1H), 7.11 (d,  $J = 7.7$  Hz, 1H), 2.91 (q,  $J = 7.6$  Hz, 2H), 1.38 (t,  $J = 7.6$  Hz, 3H). Spectra matched literature values.<sup>[21]</sup>

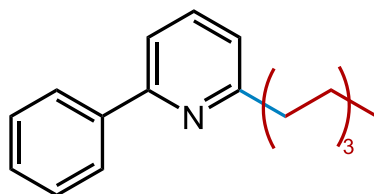

**2-heptyl-6-phenylpyridine (34)**: A colorless oil (10.6 mg, 17% yield).  $^1\text{H}$  NMR (400 MHz, Chloroform- $d$ )  $\delta$  8.00 (dd,  $J = 7.2, 1.7$  Hz, 1H), 7.64 (t,  $J = 7.7$  Hz, 1H), 7.52 (d,  $J = 7.8$  Hz, 1H), 7.47 (t,  $J = 7.7$  Hz, 1H), 7.42 – 7.37 (m, 1H), 7.08 (d,  $J = 7.6$  Hz, 1H), 2.88 – 2.83 (m, 1H), 1.84 – 1.76 (m, 1H), 1.41 – 1.27 (m, 4H), 0.89 (t,  $J = 6.8$  Hz, 2H).  $^{13}\text{C}$   $\{^1\text{H}\}$  NMR (101 MHz, Chloroform- $d$ )  $\delta$  161.4, 155.8, 138.9, 135.8, 127.6, 127.6, 126.0, 119.9, 116.7, 37.5, 30.8, 28.8, 28.4, 28.2, 21.7, 13.1. **HRMS (ESI)**: call for  $\text{C}_{18}\text{H}_{23}\text{N}$   $[\text{M}+\text{H}]^+$ : 254.1903. Found: 254.1858.

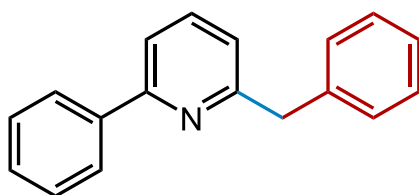

**2-benzyl-6-phenylpyridine (35)**: A colorless oil (19.5 mg, 33% yield).  $^1\text{H}$  NMR (400 MHz, Chloroform- $d$ )  $\delta$  8.02 (d,  $J = 8.5$  Hz, 2H), 7.63 (t,  $J = 7.7$  Hz, 1H), 7.55 (d,  $J = 7.7$  Hz, 1H), 7.50 – 7.45 (m, 2H), 7.43 – 7.39 (m, 1H), 7.36 – 7.30 (m, 4H), 7.26 – 7.21 (m, 1H), 7.02 (d,  $J = 7.5$  Hz, 1H), 4.24 (s, 2H). Spectra matched literature values.<sup>[22]</sup>

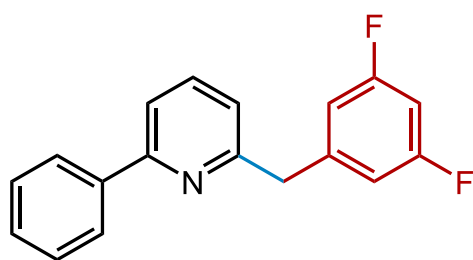**2-(3,5-difluorobenzyl)-6-phenylpyridine (36):**

A white solid (31.4 mg, 45% yield).  $^1\text{H NMR}$  (400 MHz, Chloroform-*d*)  $\delta$  8.07 – 7.98 (m, 2H), 7.68 (t,  $J = 7.7$  Hz, 1H), 7.60 (d,  $J = 6.9$  Hz, 1H), 7.53 – 7.46 (m, 2H), 7.46 – 7.39 (m, 1H), 7.05 (d,  $J = 7.5$  Hz, 1H), 6.92 – 6.82 (m, 2H), 6.68 (tt,  $J = 9.0, 2.3$  Hz, 1H), 4.20 (s, 2H).  $^{19}\text{F NMR}$  (376 MHz, Chloroform-*d*)  $\delta$  -110.29 – -110.33 (m).  $^{13}\text{C} \{^1\text{H}\}$  NMR (101 MHz, Chloroform-*d*)  $\delta$  163.1 (dd,  $J_{\text{CF}} = 242.4$  Hz, 10.1 Hz), 159.2, 157.2, 143.6 (t,  $J_{\text{CF}} = 9.4$  Hz), 139.3, 137.4, 129.0, 128.8, 127.0, 121.4, 118.4, 112.5 – 111.6 (m), 101.8 (t,  $J = 25.3$  Hz), 44.5 (t,  $J_{\text{CF}} = 2.0$  Hz). **HRMS (ESI):** call for  $\text{C}_{18}\text{H}_{13}\text{F}_2\text{N}$   $[\text{M}+\text{H}]^+$ : 282.1089. Found: 282.1088.

**2-phenyl-6-(4-(trifluoromethyl)benzyl)pyridine (37):**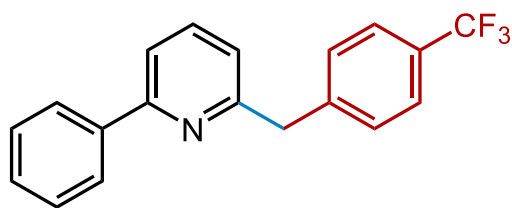

A white solid (28.1 mg, 36% yield).  $^1\text{H NMR}$  (400 MHz, Chloroform-*d*)  $\delta$  8.05 – 7.98 (m, 2H), 7.66 (t,  $J = 7.7$  Hz, 1H), 7.62 – 7.54 (m, 3H), 7.52 – 7.39 (m, 5H), 7.04 (d,  $J = 7.6$  Hz, 1H), 4.28 (s, 2H).  $^{19}\text{F NMR}$  (376 MHz, Chloroform-*d*)  $\delta$  -62.33.  $^{13}\text{C} \{^1\text{H}\}$  NMR (101 MHz, Chloroform-*d*) 159.7, 157.1, 143.8, 139.4, 137.4, 129.5, 129.0, 128.8, 128.7 (q,  $J_{\text{CF}} = 30.3$  Hz), 127.0, 125.4 (q,  $J_{\text{CF}} = 3.9$  Hz), 124.4 (q,  $J_{\text{CF}} = 272.2$  Hz), 121.4, 118.3, 44.6. **HRMS (ESI):** call for  $\text{C}_{19}\text{H}_{14}\text{F}_3\text{N}$   $[\text{M}+\text{H}]^+$ : 314.1151. Found: 314.1126.

**2-((perfluorophenyl)methyl)-6-phenylpyridine (38):**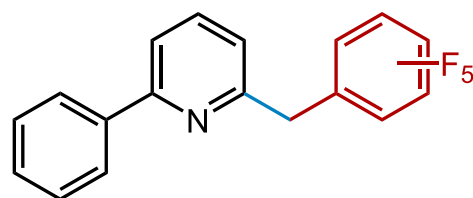

A white solid (20.9 mg, 25% yield).  $^1\text{H NMR}$  (400 MHz, Chloroform-*d*)  $\delta$  7.98 – 7.93 (m, 2H), 7.69 (t,  $J = 7.7$  Hz, 1H), 7.61 (d,  $J = 7.0$  Hz, 1H), 7.49 – 7.38 (m, 3H), 7.11 (d,  $J = 7.5$  Hz, 1H), 4.28 (s, 2H).  $^{19}\text{F NMR}$  (376 MHz, Chloroform-*d*)  $\delta$  -142.10 – -142.49 (m), -156.88 (td,  $J = 20.8, 2.7$  Hz), -162.41 – -164.03 (m).  $^{13}\text{C} \{^1\text{H}\}$  NMR (101 MHz, Chloroform-*d*)  $\delta$  156.98, 156.61, 138.94, 137.49, 129.09, 128.73, 126.81, 120.60, 118.41, 30.93. **HRMS (ESI):** call for  $\text{C}_{18}\text{H}_{10}\text{F}_5\text{N}$   $[\text{M}+\text{H}]^+$ : 336.0806. Found: 336.0802.

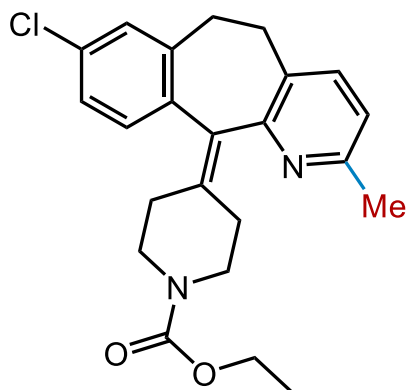

ethyl 4-(8-chloro-2-methyl-5,6-dihydro-11H-benzo[5,6]cyclohepta[1,2-b]pyridin-11-ylidene)

piperidine-1-carboxylate (**39**): A white solid (27.9 mg, 31% yield).  $^1\text{H}$  NMR (400 MHz, Chloroform-*d*)  $\delta$  7.32 (d,  $J = 7.8$  Hz, 1H), 7.18 – 7.11 (m, 3H), 6.95 (d,  $J = 7.8$  Hz, 1H), 4.13 (q,  $J = 7.1$  Hz, 2H), 3.87 (s, 2H), 3.40 – 3.25 (m, 2H), 3.06 – 2.98 (m,

2H), 2.83 – 2.73 (m, 2H), 2.49 (s, 3H), 2.43 (dd,  $J = 9.9, 4.7$  Hz, 1H), 2.34 (t,  $J = 6.6$  Hz, 3H), 1.24 (t,  $J = 7.1$  Hz, 3H).  $^{13}\text{C}$   $\{^1\text{H}\}$  NMR (101 MHz, Chloroform-*d*)  $\delta$  155.5, 155.3, 139.6, 137.8, 137.6, 137.2, 132.8, 130.6, 130.0, 129.1, 126.1, 121.9, 61.3, 44.8, 44.7, 31.9, 31.1, 30.8, 30.5, 24.1, 14.7. HRMS (ESI): call for  $\text{C}_{23}\text{H}_{25}\text{ClN}_2\text{O}_2$   $[\text{M}+\text{H}]^+$ : 397.1677. Found: 397.1675.

(*R*)-2-(4-chloro-3-(4-((tetrahydrofuran-3-yl)oxy)benzyl)phenyl)-6-

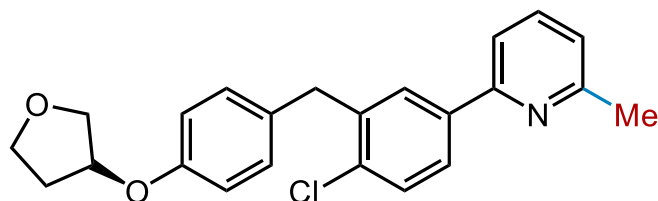

methylpyridine (**40**): A colorless oil (42.9 mg, 45% yield).

$^1\text{H}$  NMR (400 MHz, Chloroform-*d*)  $\delta$  7.86 – 7.74 (m,

2H), 7.60 (t,  $J = 7.7$  Hz, 1H), 7.44 (dd,  $J = 11.0, 8.0$  Hz, 2H), 7.14 (d,  $J = 8.7$  Hz, 2H), 7.09 (d,  $J = 7.6$  Hz, 1H), 6.84 – 6.69 (m, 2H), 4.90 – 4.86 (m, 1H), 4.12 (s, 2H), 4.02 – 3.93 (m, 3H), 3.88 (td,  $J = 8.0, 4.8$  Hz, 1H), 2.60 (s, 3H), 2.21 – 2.09 (m, 2H).  $^{13}\text{C}$   $\{^1\text{H}\}$  NMR (101 MHz, Chloroform-*d*)  $\delta$  158.5, 155.8, 155.8, 139.0, 138.6, 137.0, 134.9, 132.0, 129.9, 129.9, 129.6, 126.3, 121.9, 117.5, 115.4, 77.3, 73.2, 67.2, 38.5, 33.0, 24.7. HRMS (ESI): call for  $\text{C}_{23}\text{H}_{22}\text{ClNO}_2$   $[\text{M}+\text{H}]^+$ : 380.1412. Found: 380.1410.

ethyl 2-methyl-2-(4-(6-methylpyridin-2-yl)phenoxy)propanoate (**41**): A colorless

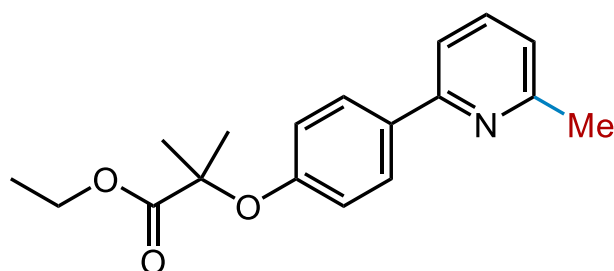

oil (30.5 mg, 41% yield).  $^1\text{H}$  NMR (400 MHz, Chloroform-*d*)  $\delta$  7.90 – 7.84 (m, 2H), 7.58 (t,  $J = 7.7$  Hz, 1H), 7.43 (d,  $J = 7.8$  Hz, 1H), 7.03 (d,  $J = 7.6$  Hz, 1H), 6.96 – 6.86 (m, 2H),

4.24 (q,  $J = 7.1$  Hz, 2H), 2.59 (s, 3H), 1.62 (s, 6H), 1.25 (t,  $J = 7.1$  Hz, 3H).  $^{13}\text{C}$   $\{^1\text{H}\}$  NMR (101 MHz, Chloroform-*d*)  $\delta$  174.3, 158.2, 156.5, 156.2, 136.8, 133.7, 127.9, 121.1, 119.0, 117.1, 79.2, 61.5, 25.4, 24.8, 14.1. HRMS (ESI): call for  $\text{C}_{18}\text{H}_{21}\text{NO}_3$   $[\text{M}+\text{H}]^+$ : 300.1594. Found: 300.1591.

**(1R,2S,5R)-2-isopropyl-5-methylcyclohexyl**

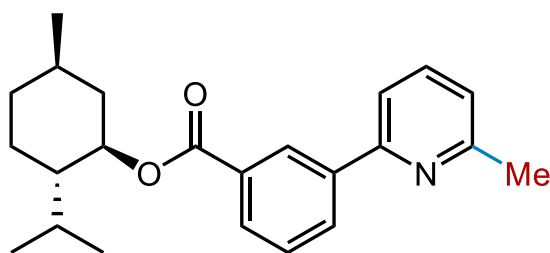

**3-(6-methylpyridin-2-yl)benzoate**

**(42):** A colorless oil (35.1 mg, 40% yield).  $^1\text{H}$  NMR (400 MHz, Chloroform-*d*)  $\delta$  8.60 – 8.60 (m, 1H), 8.25 – 8.18 (m, 1H), 8.07 (dt,  $J = 7.8$ ,

1.4 Hz, 1H), 7.66 (t,  $J = 7.7$  Hz, 1H), 7.59 – 7.50 (m, 2H), 7.13 (d,  $J = 7.5$  Hz, 1H), 4.98 (td,  $J = 10.9, 4.4$  Hz, 1H), 2.64 (s, 3H), 2.19 – 2.11 (m, 1H), 1.77 – 1.70 (m, 2H), 1.63 – 1.52 (m, 2H), 1.20 – 1.09 (m, 2H), 0.93 (dd,  $J = 6.8, 4.9$  Hz, 7H), 0.81 (d,  $J = 7.0$  Hz, 3H).  $^{13}\text{C}$   $\{^1\text{H}\}$  NMR (101 MHz, Chloroform-*d*)  $\delta$  166.1, 158.6, 156.0, 140.1, 137.0, 131.3, 131.3, 129.7, 128.8, 128.1, 122.0, 117.7, 75.0, 47.3, 41.0, 34.4, 31.5, 26.5, 24.7, 23.7, 22.1, 20.8, 16.6. HRMS (ESI): call for  $\text{C}_{23}\text{H}_{29}\text{NO}_2$   $[\text{M}+\text{H}]^+$ : 352.2271. Found: 352.2270.

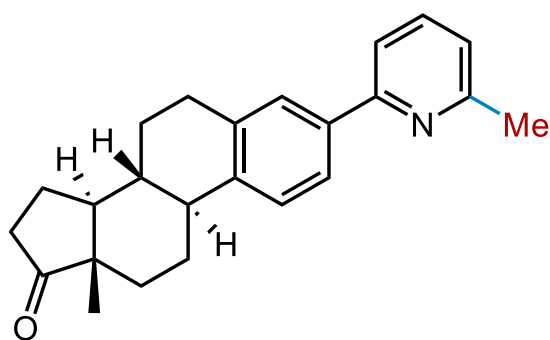

**(8R,9S,13S,14S)-13-methyl-3-(6-methylpyridin-2-yl)-**

**6,7,8,9,11,12,13,14,15,16-decahydro-17H-cyclopenta[a]phenanthren-17-one (43):** A white solid (73.0 mg, 85% yield).  $^1\text{H}$  NMR (400 MHz, Chloroform-*d*)  $\delta$  7.72 (dd,  $J = 10.5, 2.6$

Hz, 2H), 7.61 (t,  $J = 7.7$  Hz, 1H), 7.49 (d,  $J = 7.8$  Hz, 1H), 7.38 (d,  $J = 8.1$  Hz, 1H), 7.07 (d,  $J = 7.6$  Hz, 1H), 3.05 – 2.98 (m, 2H), 2.62 (s, 3H), 2.55 – 2.45 (m, 3H), 2.36 (td,  $J = 10.8, 4.2$  Hz, 1H), 2.18 – 1.95 (m, 5H), 1.67 – 1.46 (m, 9H), 0.93 (s, 3H).  $^{13}\text{C}$   $\{^1\text{H}\}$  NMR (101 MHz, Chloroform-*d*)  $\delta$  158.3, 156.9, 140.5, 137.3, 136.9, 136.8, 127.5, 125.7, 124.3, 121.4, 117.5, 50.6, 48.0, 44.5, 38.2, 38.1, 35.9, 31.6, 29.5, 26.6, 25.8, 24.8, 21.6, 13.9. HRMS (ESI): call for  $\text{C}_{24}\text{H}_{27}\text{NO}$   $[\text{M}+\text{H}]^+$ : 346.2165. Found: 346.2165.

**4,4'-((6-methylpyridin-2-yl)methylene)diphenol (44):**  $^1\text{H}$  NMR (400 MHz,

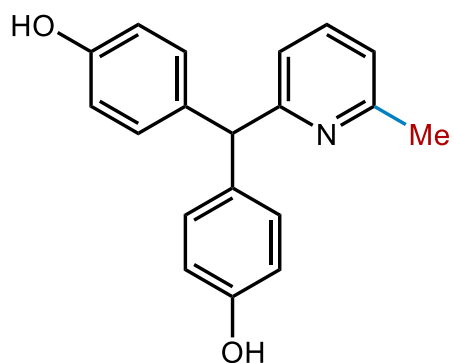

Methanol- $d_4$ )  $\delta$  7.64 (t,  $J = 7.8$  Hz, 1H), 7.14 (d,  $J = 7.7$  Hz, 1H), 6.90 (d,  $J = 8.6$  Hz, 5H), 6.73 (d,  $J = 8.6$  Hz, 4H), 5.51 (s, 1H), 2.52 (s, 3H).

$^{13}\text{C}$   $\{^1\text{H}\}$  NMR (101 MHz, Methanol- $d_4$ )  $\delta$  163.4, 157.4, 155.7, 137.5, 133.8, 129.9, 121.2, 121.0, 114.7, 57.1, 22.1. **HRMS (ESI):** call for

$\text{C}_{19}\text{H}_{17}\text{NO}_2$   $[\text{M}+\text{H}]^+$ : 291.1259. Found: 291.1250.

## 4. References

- [1] J. Y. Kim, S. H. Park, J. Ryu, S. H. Cho, S. H. Kim and S. Chang, *J. Am. Chem. Soc.*, 2012, **134**, 9110-9113.
- [2] K. Xu, W. Li, R. Sun, L. Luo, X. Chen, C. Zhang, X. Zheng, M. Yuan, H. Fu, R. Li and H. Chen, *Org. Lett.*, 2020, **22**, 6107-6111.
- [3] W. Li, Y. Chen, R. Yuan, X. Jia, Y. Yao and L. Zhang, *Angew. Chem. Int. Ed.*, 2025, **64**.
- [4] E. Le Saux, E. Georgiou, I. A. Dmitriev, W. C. Hartley and P. Melchiorre, *J. Am. Chem. Soc.*, 2022, **145**, 47-52.
- [5] J. Liang, L. Dong, F. Qian, Y. Kong, M. Wang, X. Xu, X. Shao and Z. Li, *Chin. Chem. Lett.*, 2022, **33**, 4817-4821.
- [6] J. Tang, S. Li, J. Zhang, M.-X. Yan, Y.-L. Shi, X.-L. Zheng, M.-L. Yuan, H.-Y. Fu, R.-X. Li and H. Chen, *Org. Lett.*, 2023, **25**, 5203-5208.
- [7] L. Luo, J. Tang, R. Sun, W. Li, X. Zheng, M. Yuan, R. Li, H. Chen and H. Fu, *Org. Lett.*, 2022, **24**, 2821-2825.
- [8] J. Tang, C. Zhao, S. Li, J. Zhang, X. Zheng, M. Yuan, H. Fu, R. Li and H. Chen, *J. Org. Chem.*, 2023, **88**, 2809-2821.
- [9] S. Li, W.-J. Li, X. Yang, R. Sun, J. Tang, X.-L. Zheng, M.-L. Yuan, R.-X. Li, H. Chen and H.-Y. Fu, *Org. Chem. Front.*, 2020, **7**, 3887-3895.
- [10] W. J. Org. Chem. Li, J. Tang, S. Li, X. Zheng, M. Yuan, B. Xu, W. Jiang, H. Fu, R. Li and H. Chen, *Org. Lett.*, 2020, **22**, 7814-7819.
- [11] C. Yin, K. Zhong, W. Li, X. Yang, R. Sun, C. Zhang, X. Zheng, M. Yuan, R. Li, Y. Lan, H. Fu and H. Chen, *Adv. Synth. Catal.*, 2018, **360**, 3990-3998.
- [12] E. D. Lorance, W. H. Kramer and L. R. Gould, *J. Am. Chem. Soc.*, 2004, **126**, 14071-14078.
- [13] Y. Liu and H. Du, *J. Am. Chem. Soc.*, 2013, **135**, 12968-12971.
- [14] X. Yao, L. Qi, R. Li, Q. Zhen, J. Liu, Z. Zhao, Y. Shao, M. Hu and J. Chen, *ACS Comb. Sci.*, 2020, **22**, 114-119.
- [15] D.-D. Lu, X.-X. He and F.-S. Liu, *J. Org. Chem.*, 2017, **82**, 10898-10911.
- [16] M. Zheng, P. Chen, W. Wu and H. Jiang, *Chem. Comm.*, 2016, **52**, 84-87.
- [17] M. Z. Chen and G. C. Micalizio, *J. Am. Chem. Soc.*, 2011, **134**, 1352-1356.

- 
- [18] B. Xiao, Z.-J. Liu, L. Liu and Y. Fu, *J. Am. Chem. Soc.*, 2013, **135**, 616-619.
- [19] C. Li, H.-B. Xu, J. Zhang, M. Liu and L. Dong, *Org. Biomol. Chem.*, 2020, **18**, 1412-1416.
- [20] M. E. Domaradzki, Y. Long, Z. She, X. Liu, G. Zhang and Y. Chen, *J. Org. Chem.*, 2015, **80**, 11360-11368.
- [21] B.-T. Guan and Z. Hou, *J. Am. Chem. Soc.*, 2011, **133**, 18086-18089.
- [22] W. Zhou, T. Miura and M. Murakami, *Angew. Chem. Int. Ed.*, 2018, **57**, 5139-5142.

## 5. NMR spectra

$^1\text{H}$  NMR (400 MHz,  $\text{DMSO-}d_6$ ) of compound **1a**

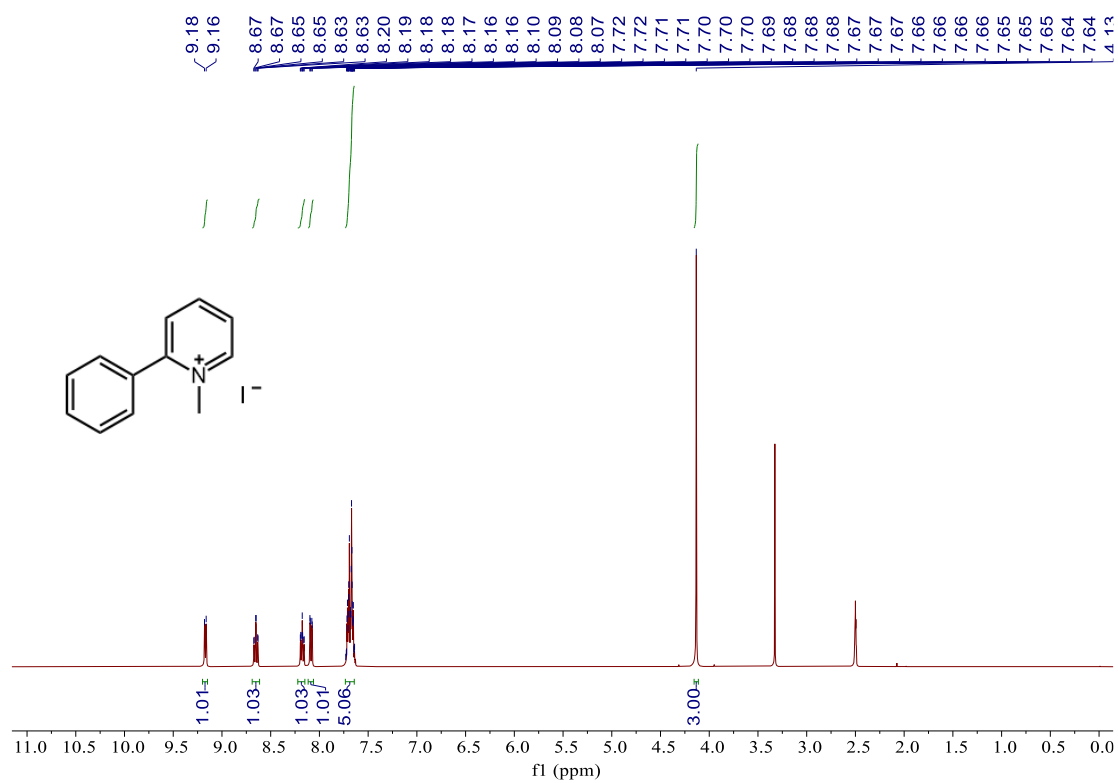

$^1\text{H}$  NMR (400 MHz,  $\text{DMSO-}d_6$ ) of compound **2a**

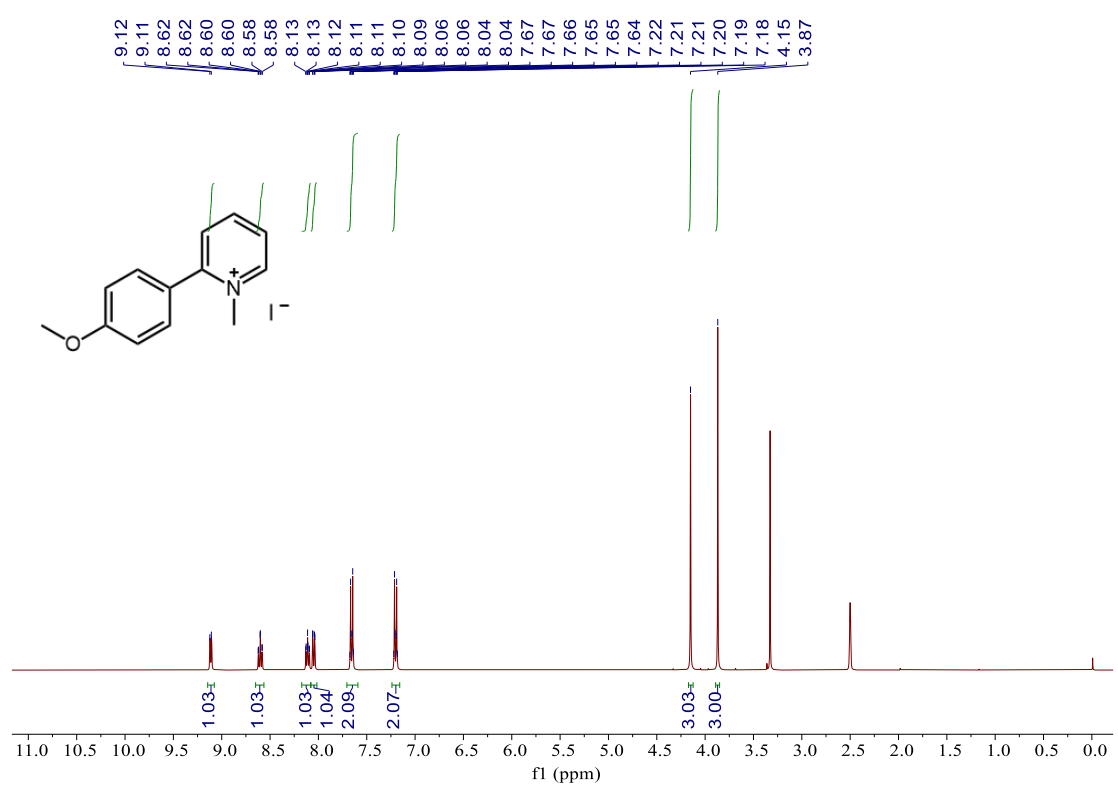

$^1\text{H}$  NMR (400 MHz,  $\text{DMSO-}d_6$ ) of compound **3a**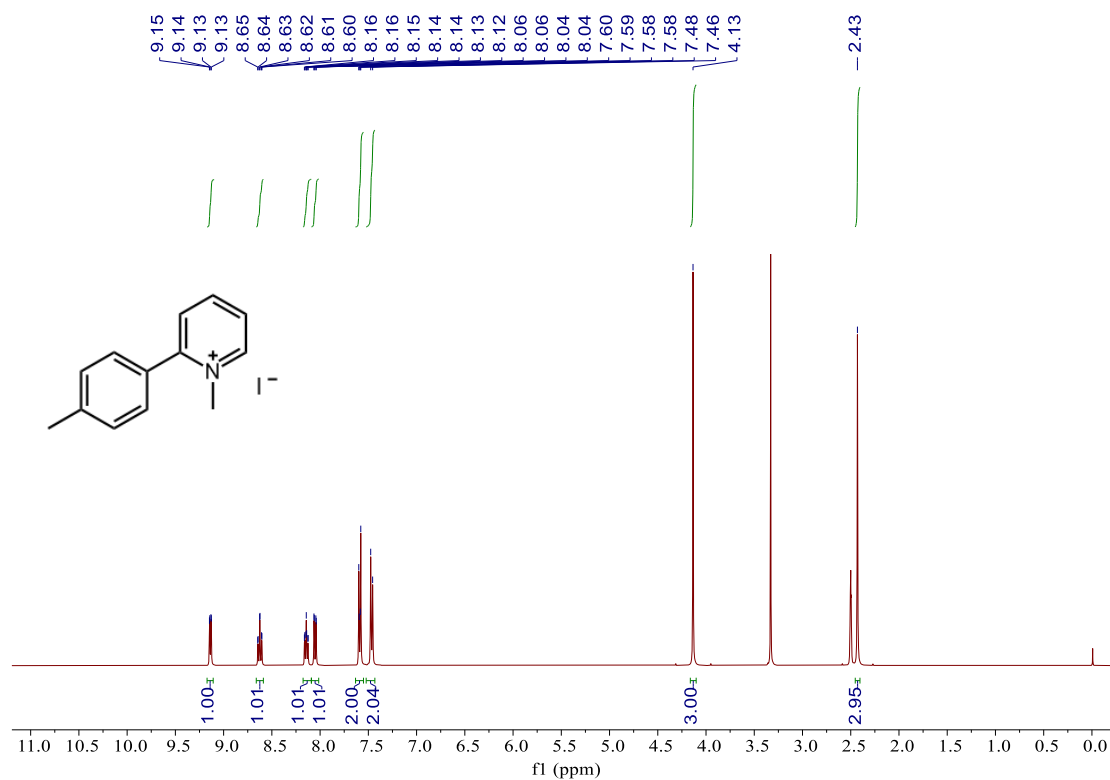 $^1\text{H}$  NMR (400 MHz,  $\text{DMSO-}d_6$ ) of compound **4a**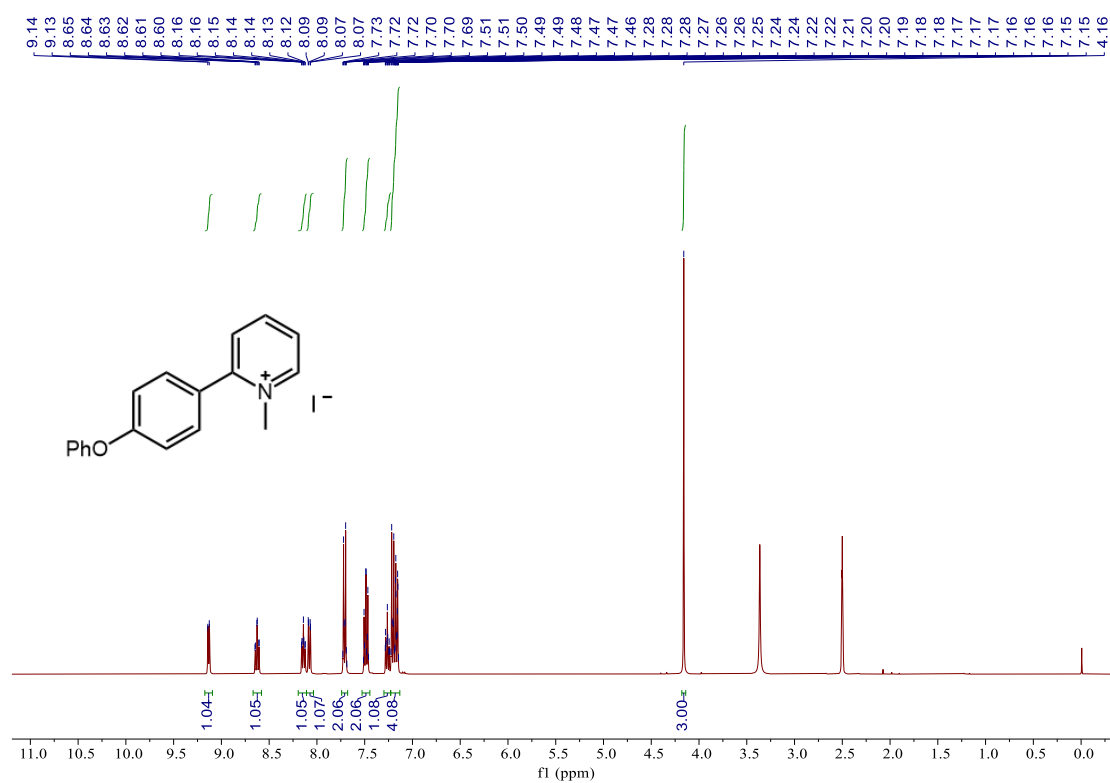

$^{13}\text{C}$  NMR (101 MHz,  $\text{DMSO-}d_6$ ) of compound **4a**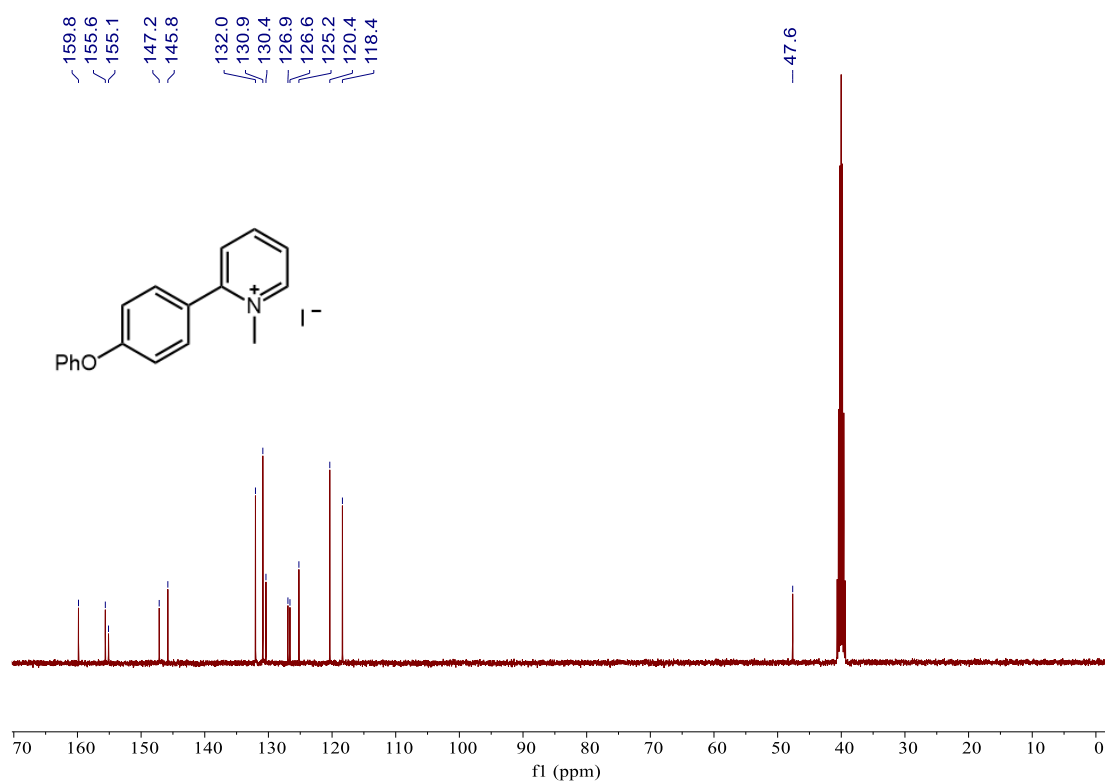 $^1\text{H}$  NMR (400 MHz,  $\text{DMSO-}d_6$ ) of compound **5a**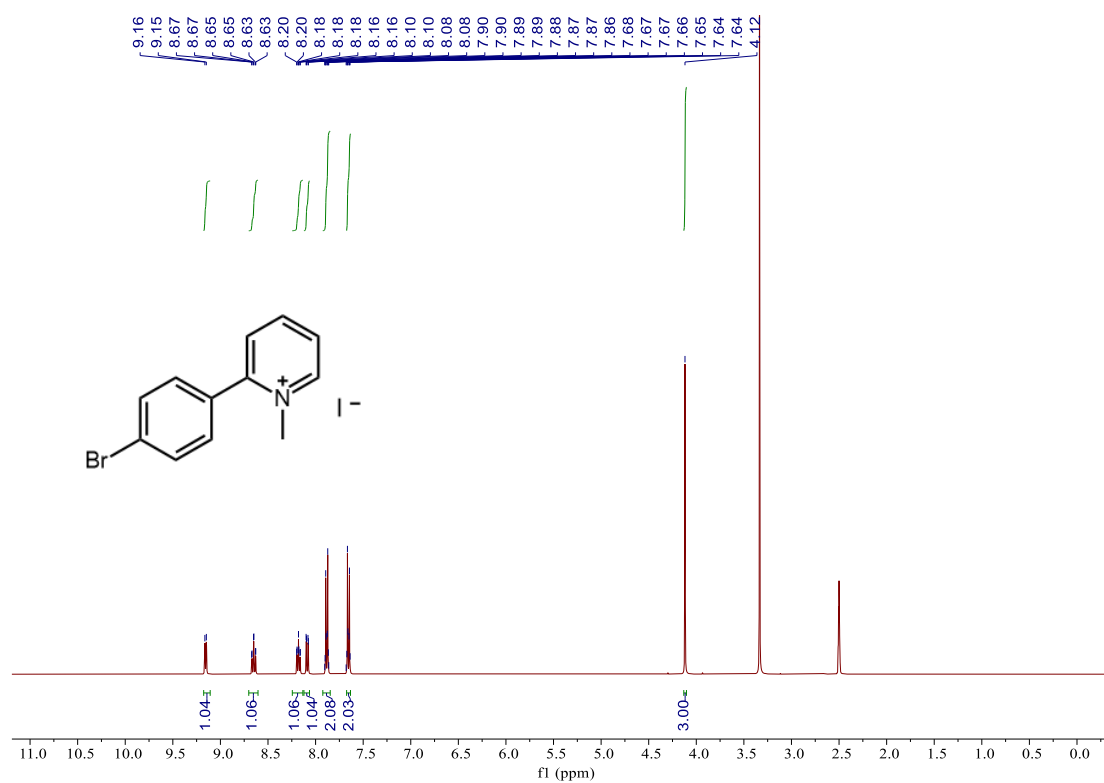

$^1\text{H}$  NMR (400 MHz,  $\text{DMSO-}d_6$ ) of compound **6a**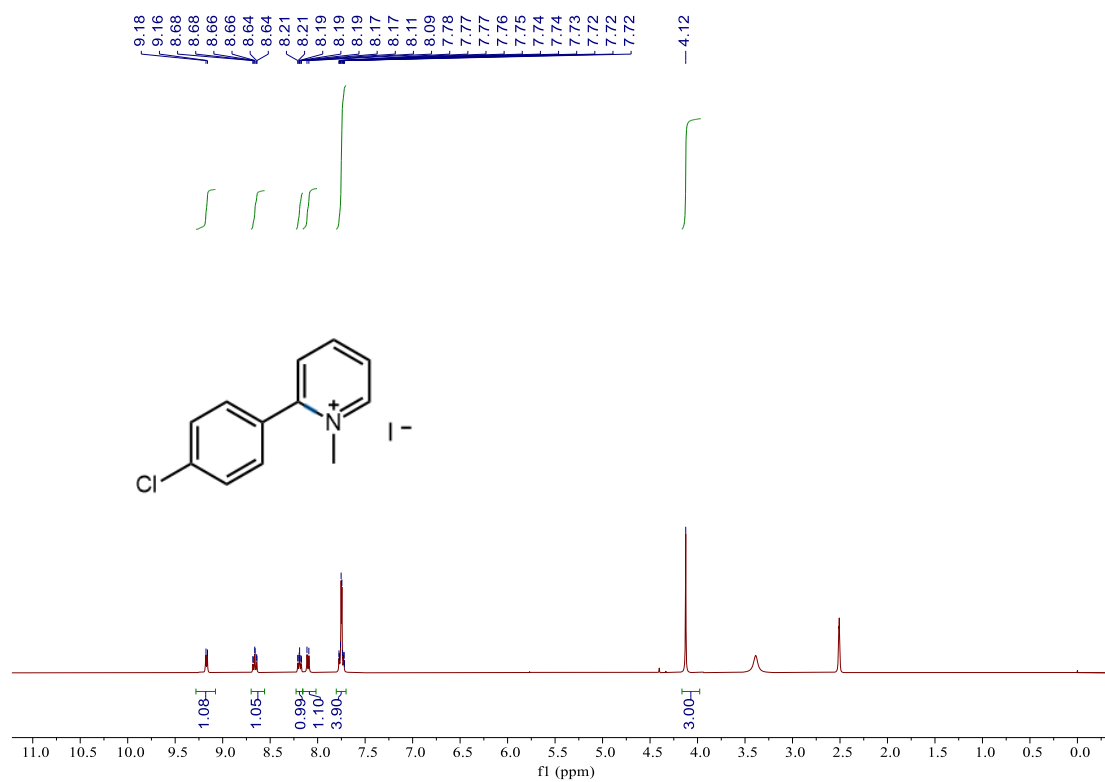 $^1\text{H}$  NMR (400 MHz,  $\text{DMSO-}d_6$ ) of compound **7a**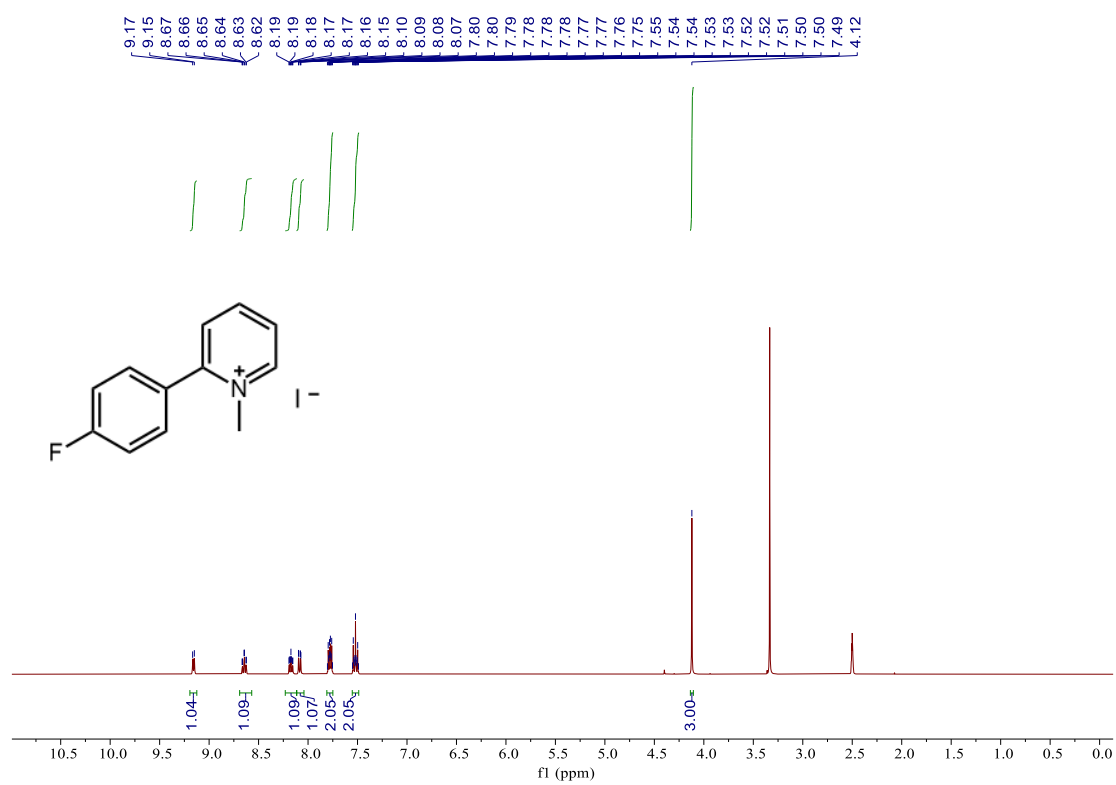

$^1\text{H}$  NMR (400 MHz,  $\text{DMSO-}d_6$ ) of compound **8a**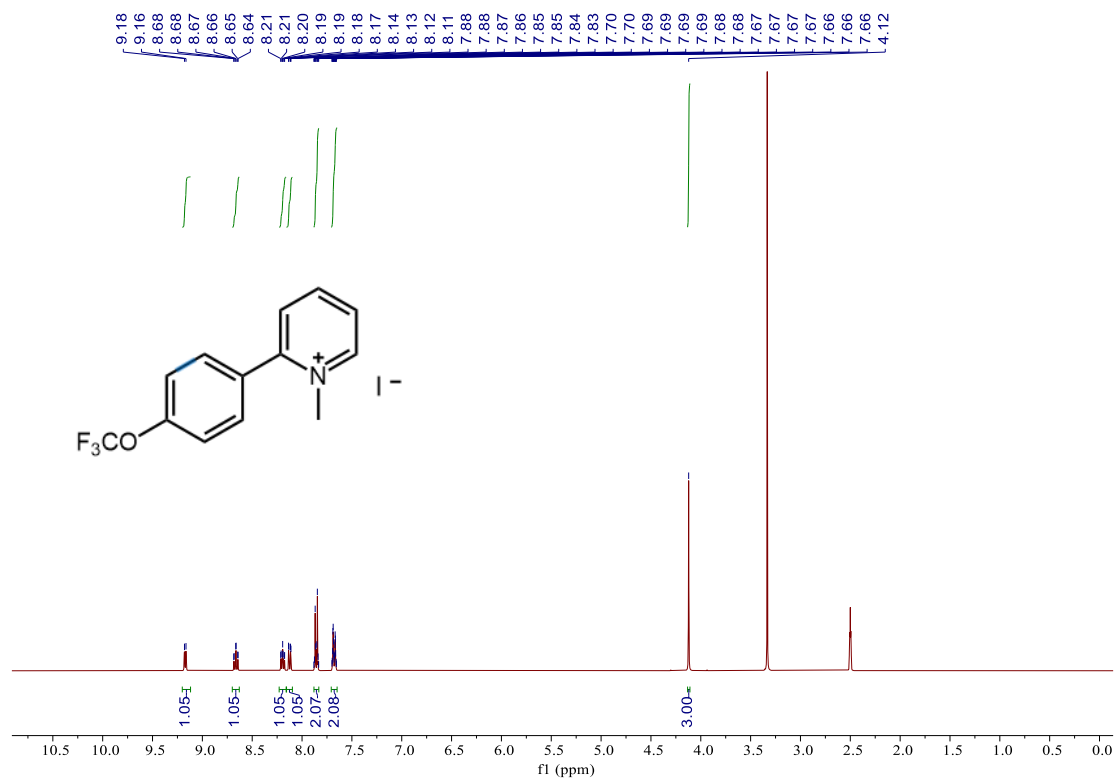 $^{19}\text{F}$  NMR (400 MHz,  $\text{DMSO-}d_6$ ) of compound **8a**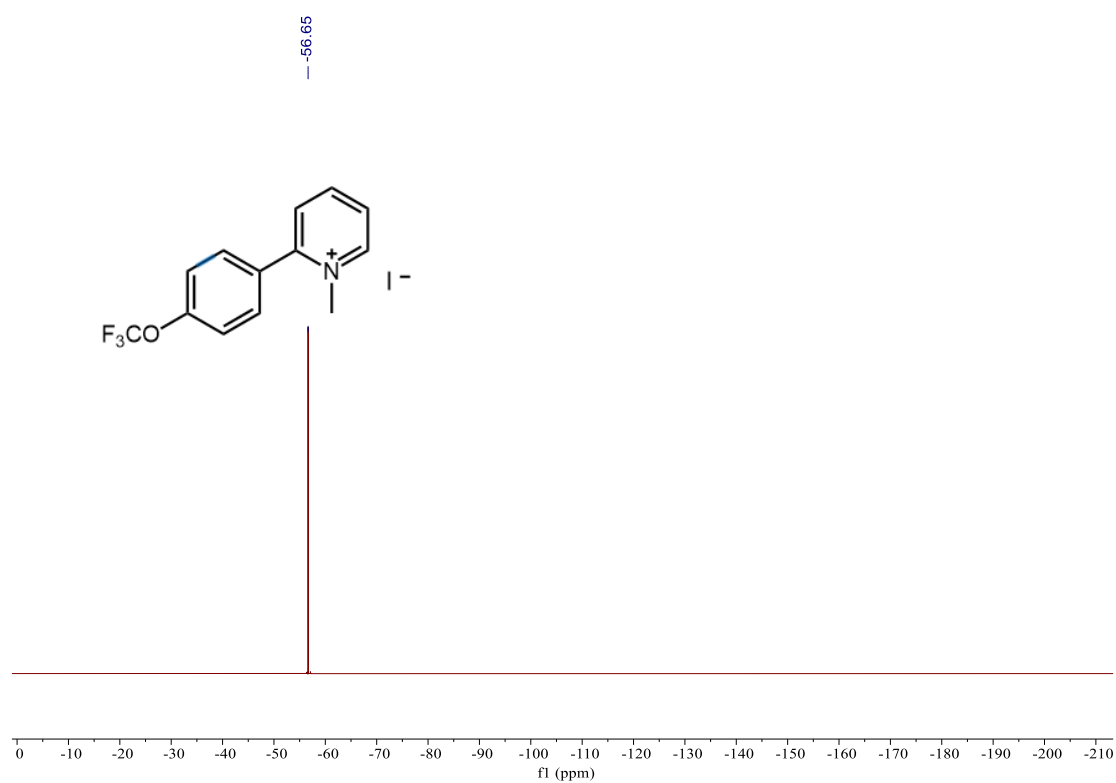

$^{13}\text{C}$  NMR (101 MHz,  $\text{DMSO-}d_6$ ) of compound **8a**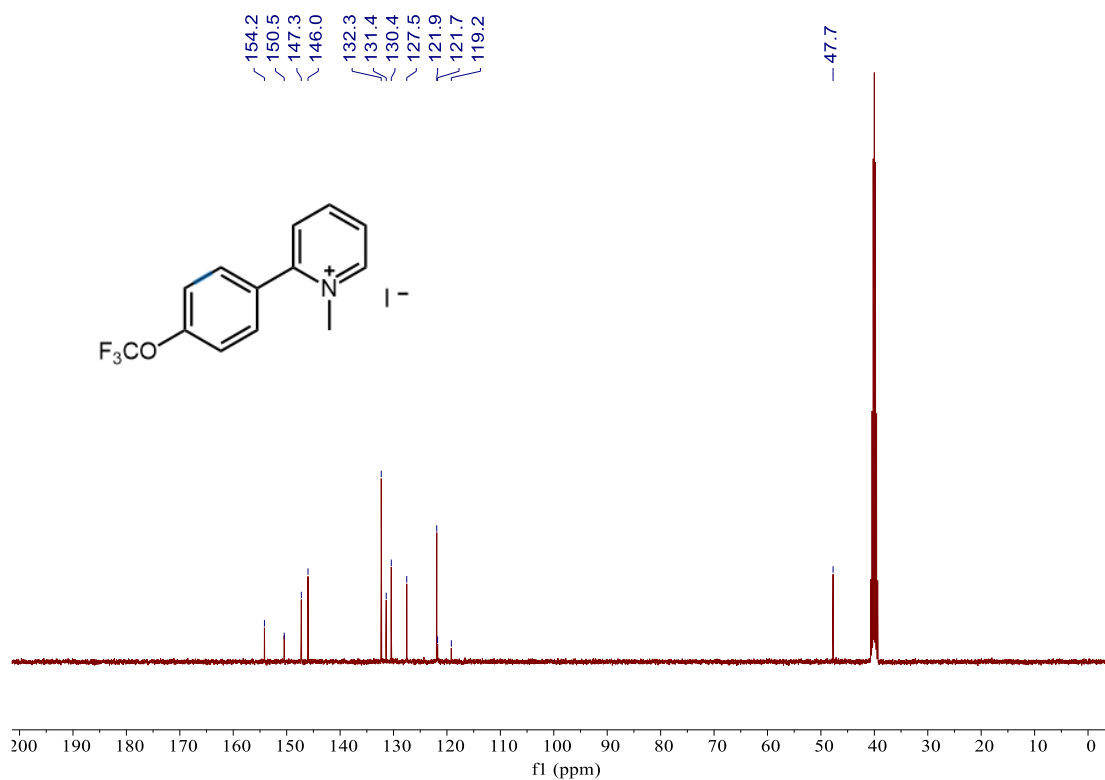 $^1\text{H}$  NMR (400 MHz,  $\text{DMSO-}d_6$ ) of compound **9a**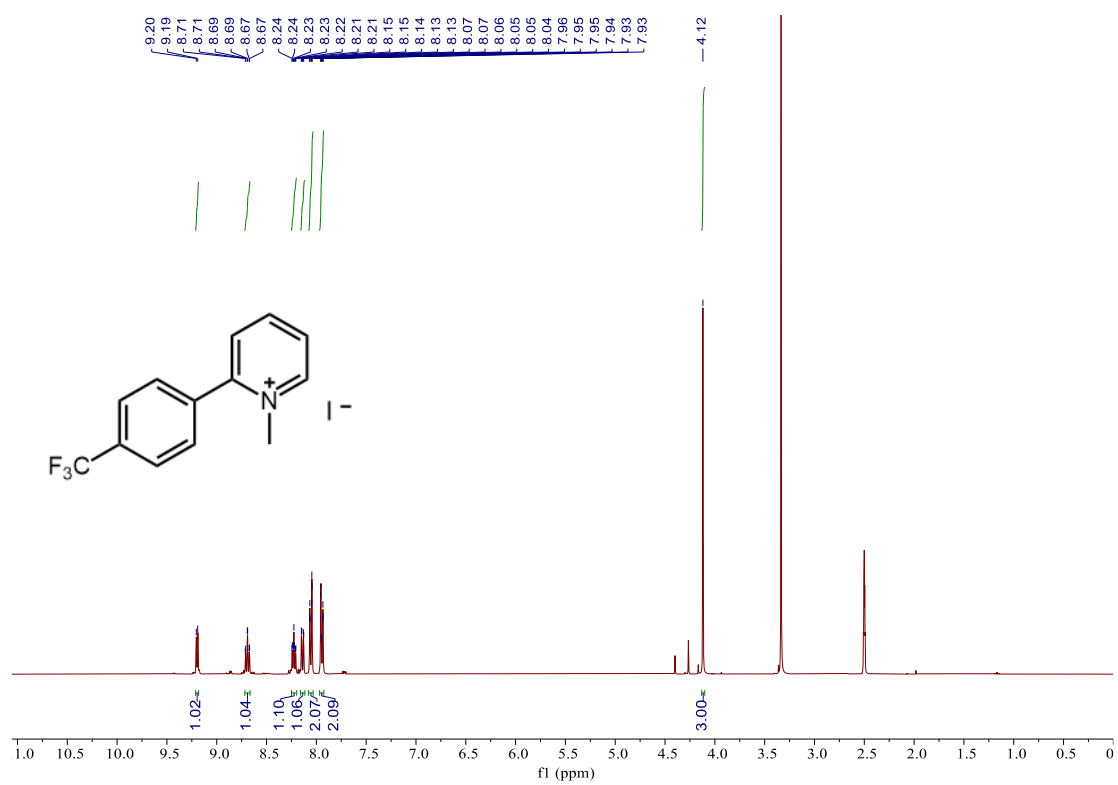

$^1\text{H}$  NMR (400 MHz,  $\text{DMSO-}d_6$ ) of compound **10a**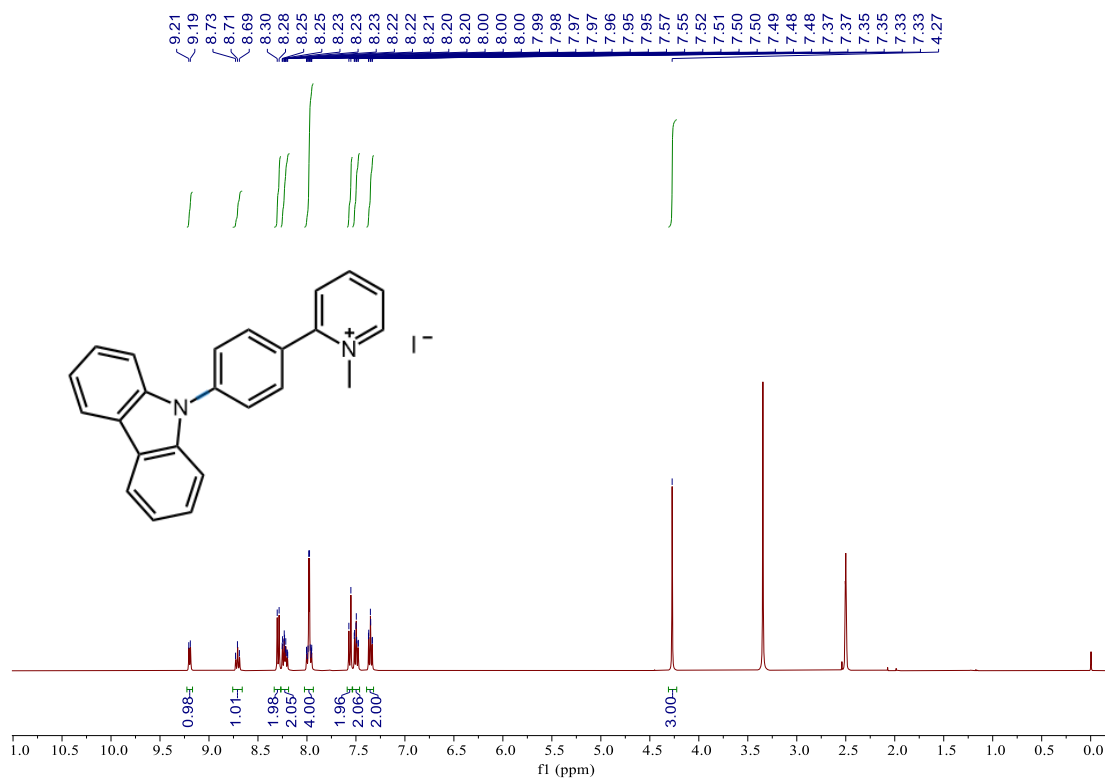 $^{13}\text{C}$  NMR (101 MHz,  $\text{DMSO-}d_6$ ) of compound **10a**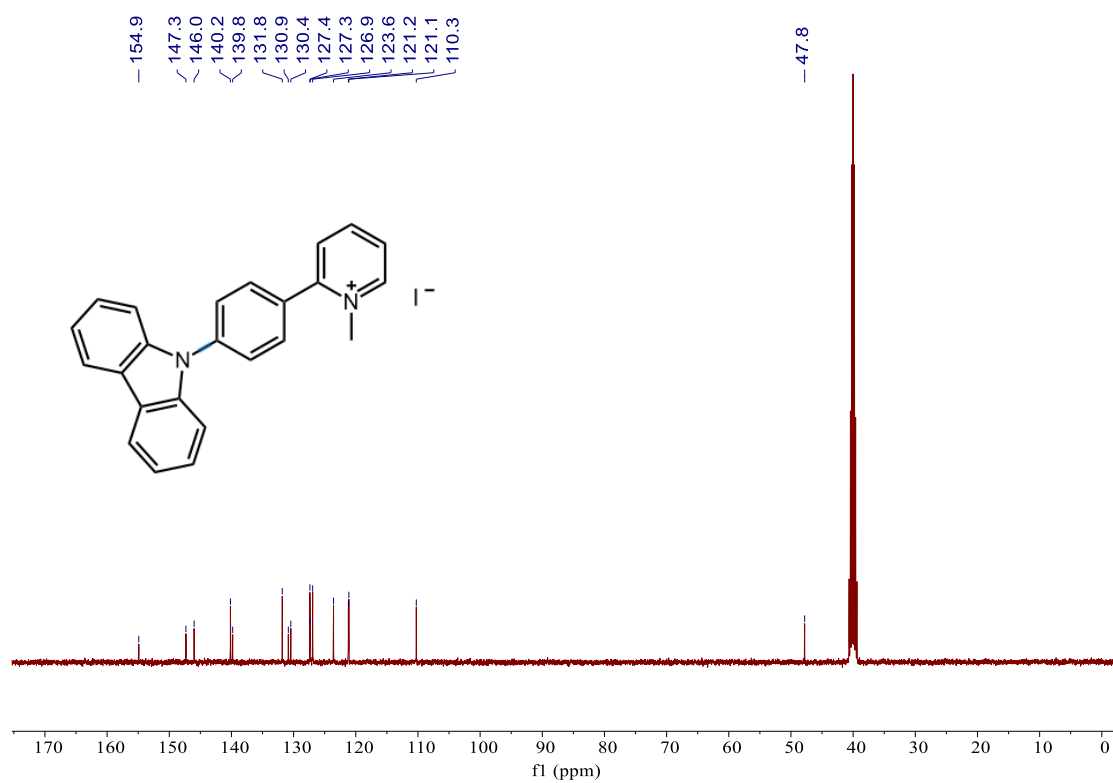



$^{19}\text{F}$  NMR (400 MHz,  $\text{DMSO-}d_6$ ) of compound **12a**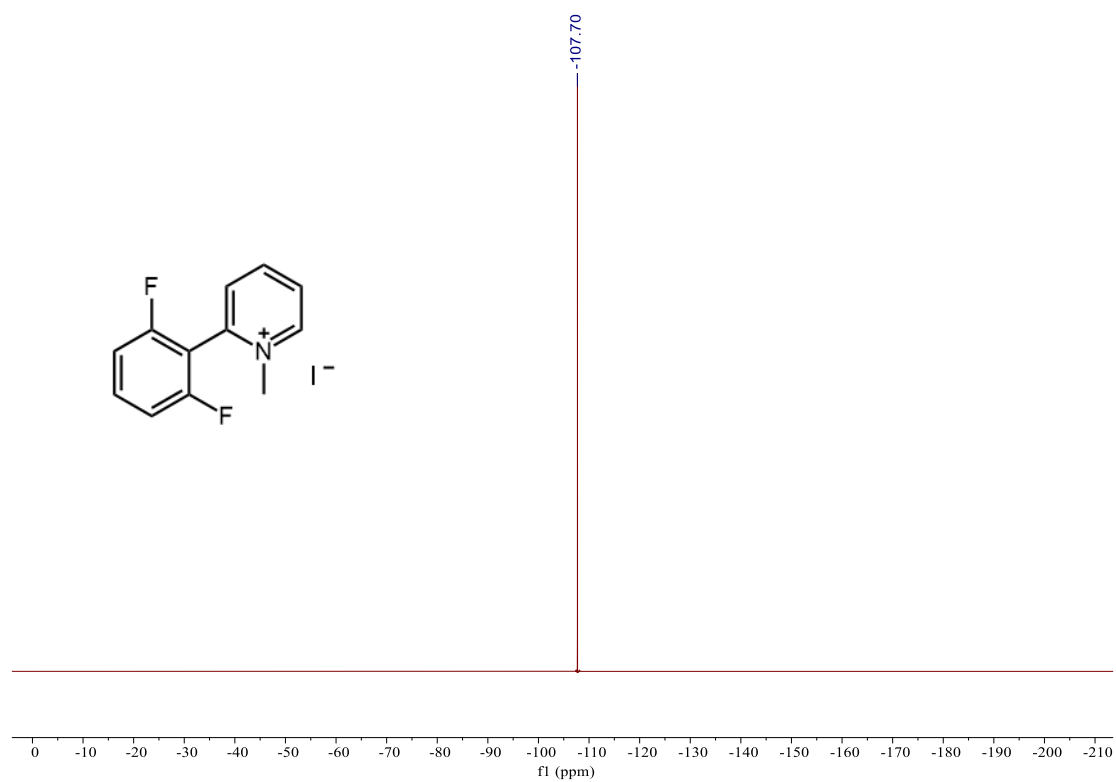 $^{13}\text{C}$  NMR (101 MHz,  $\text{DMSO-}d_6$ ) of compound **12a**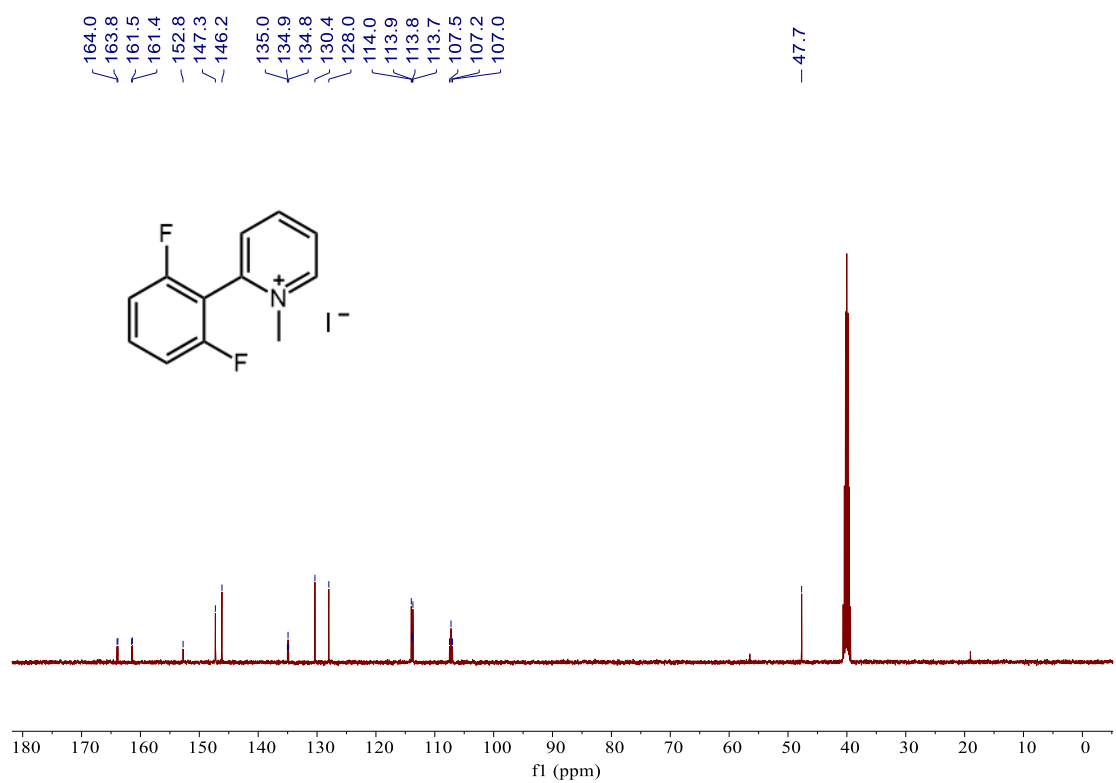

$^1\text{H}$  NMR (400 MHz,  $\text{DMSO-}d_6$ ) of compound **13a**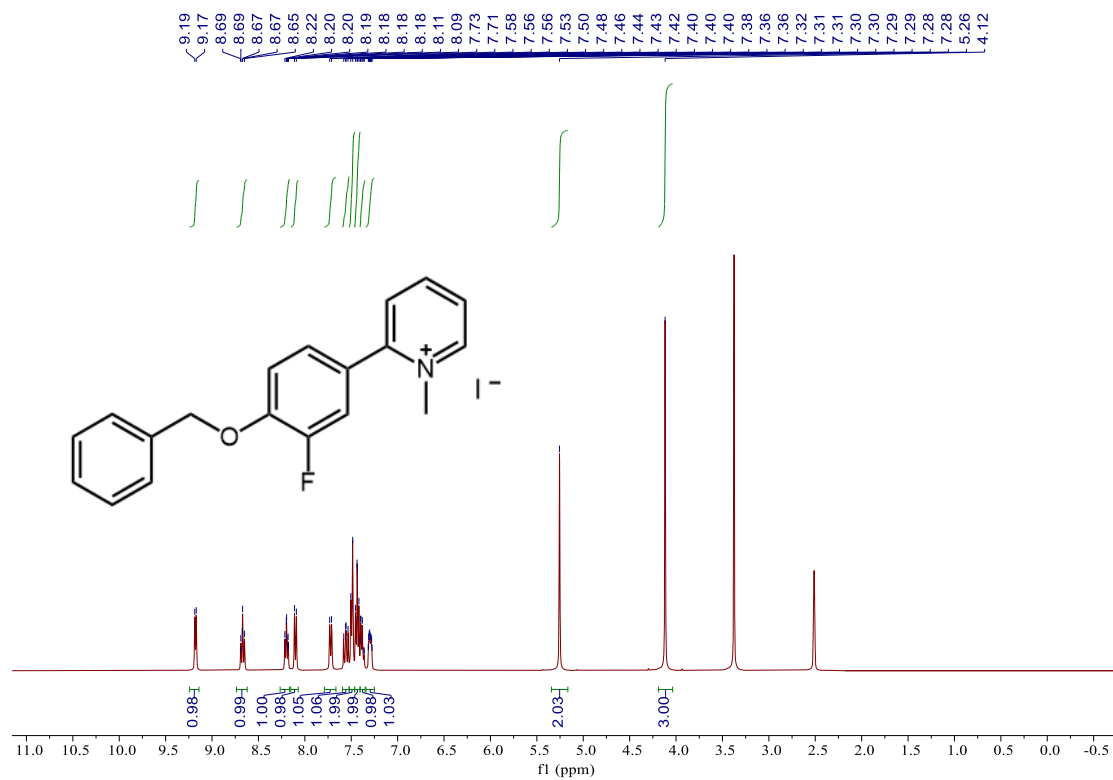 $^{19}\text{F}$  NMR (400 MHz,  $\text{DMSO-}d_6$ ) of compound **13a**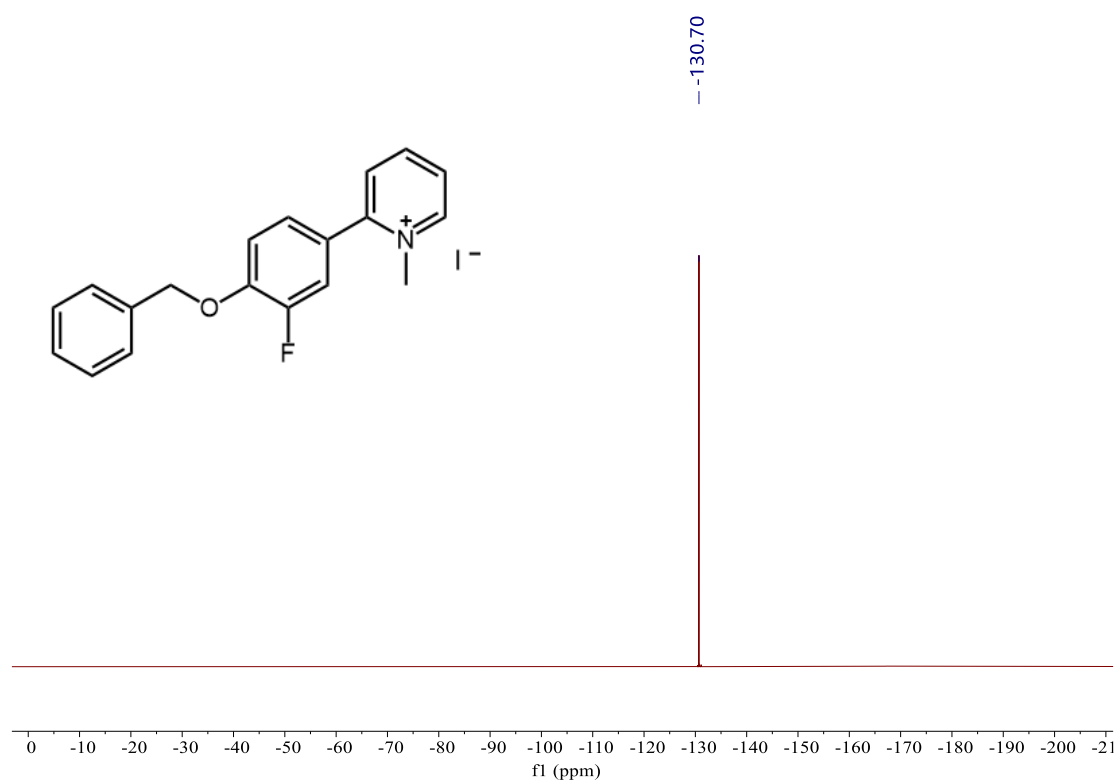

$^{13}\text{C}$  NMR (101 MHz,  $\text{DMSO-}d_6$ ) of compound **13a**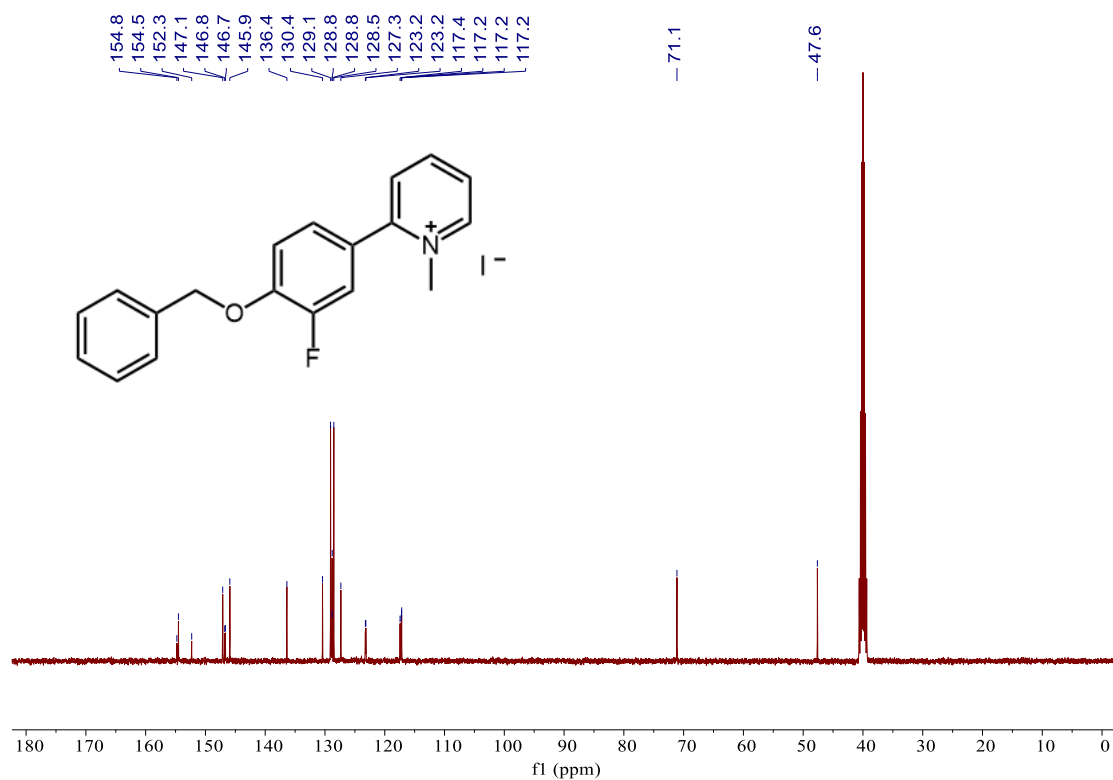 $^1\text{H}$  NMR (400 MHz,  $\text{DMSO-}d_6$ ) of compound **14a**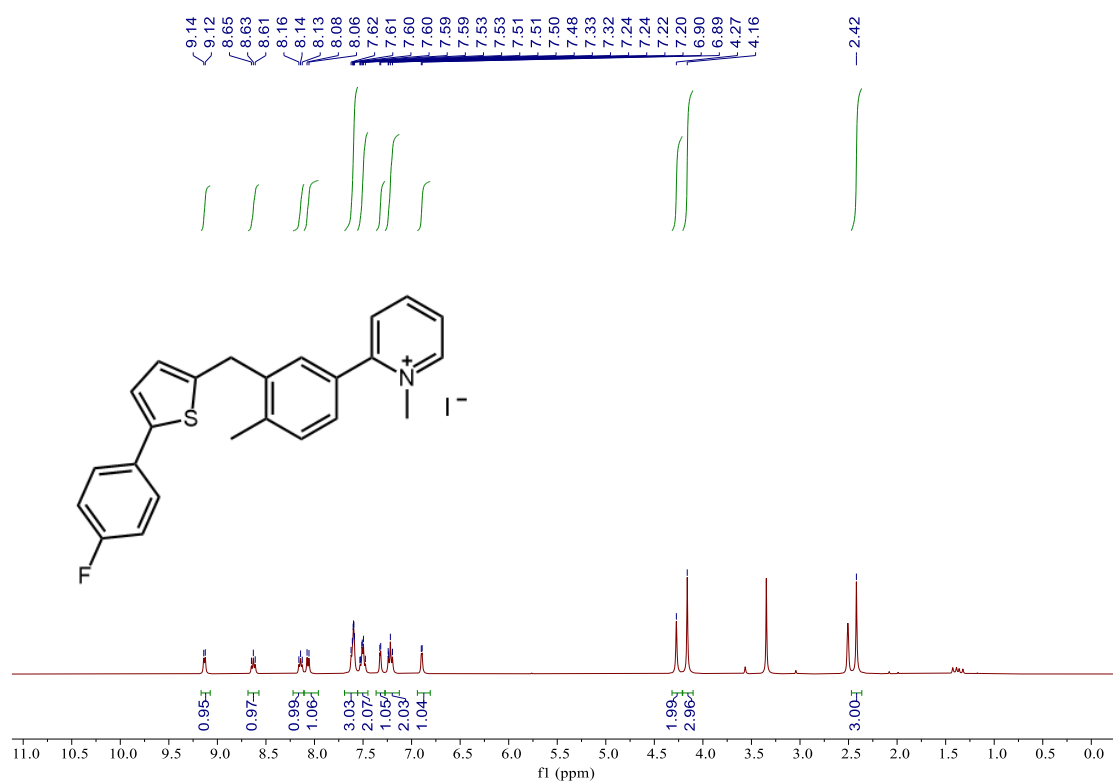

$^{19}\text{F}$  NMR (400 MHz,  $\text{DMSO-}d_6$ ) of compound **14a**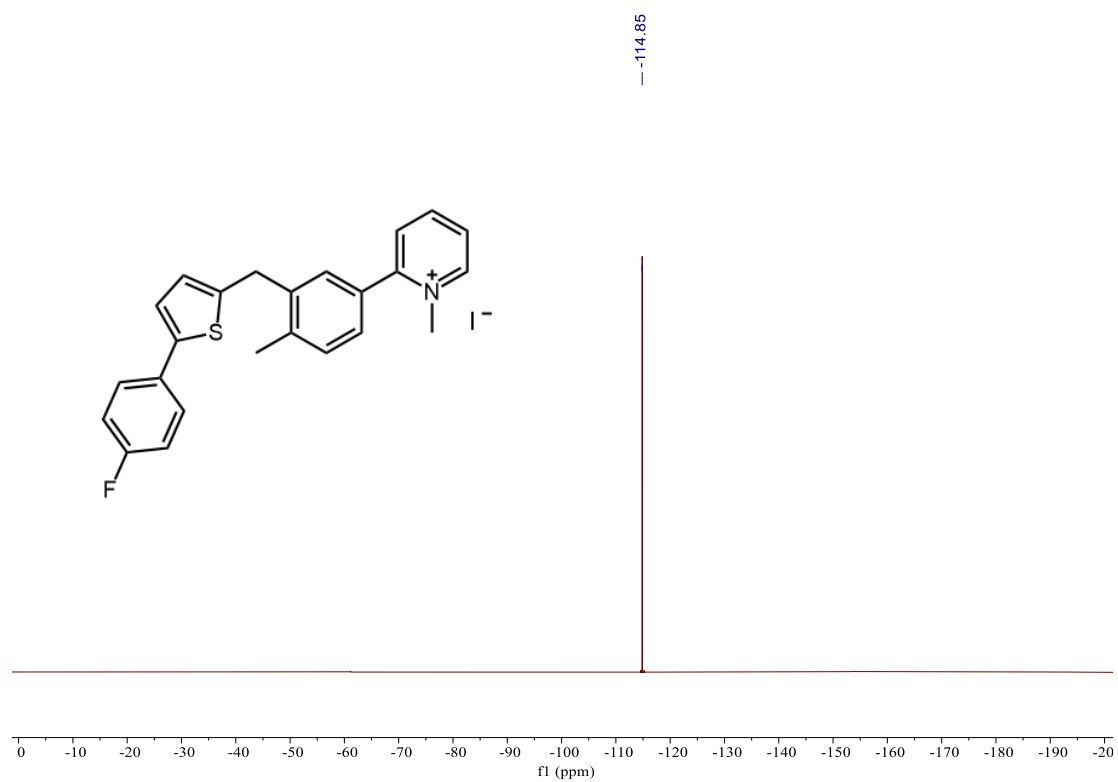 $^{13}\text{C}$  NMR (101 MHz,  $\text{DMSO-}d_6$ ) of compound **14a**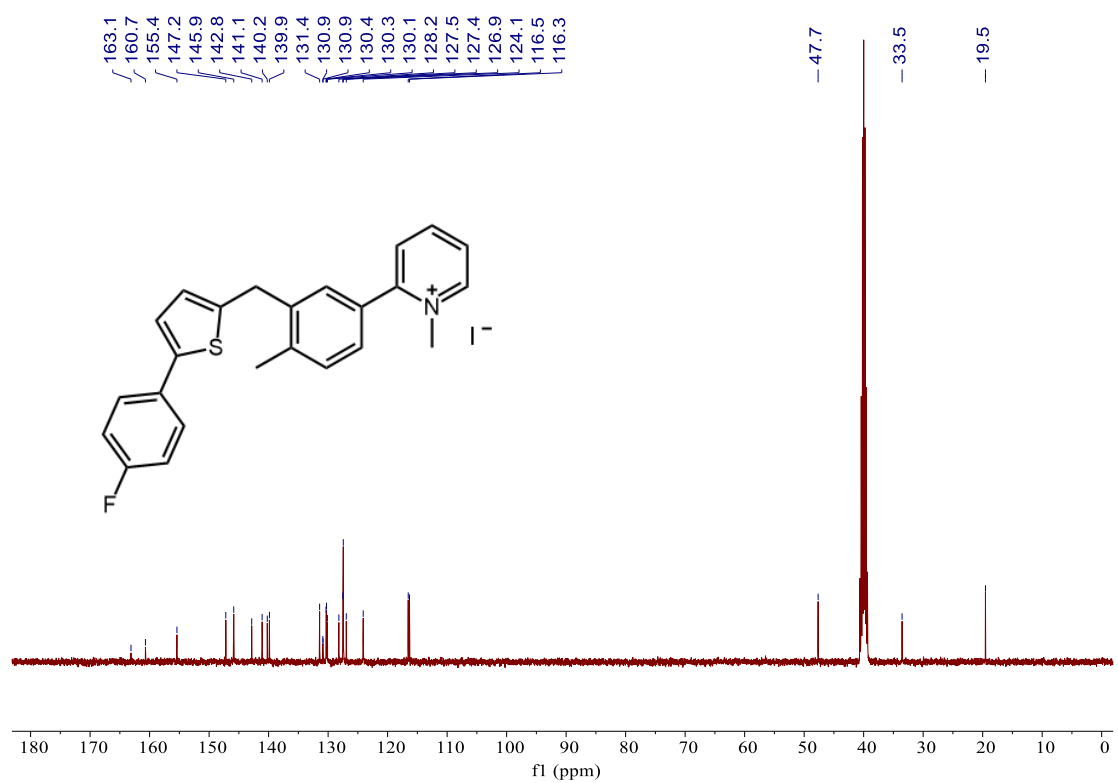

$^1\text{H}$  NMR (400 MHz,  $\text{DMSO-}d_6$ ) of compound **15a**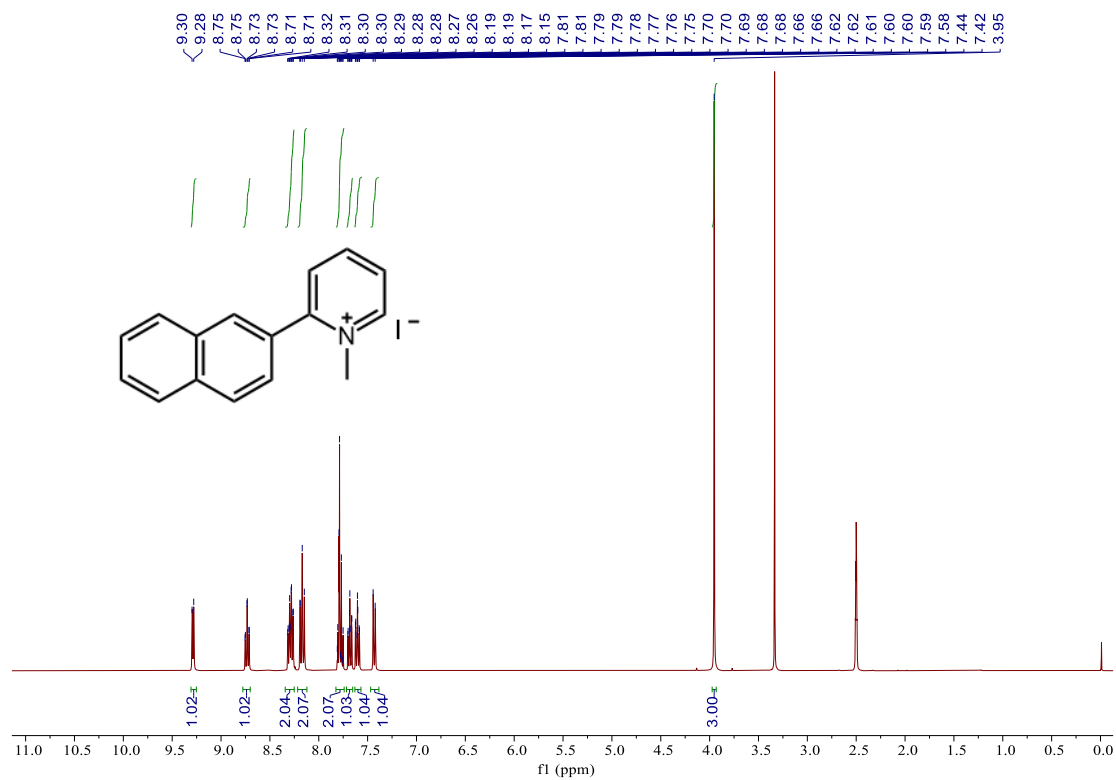 $^1\text{H}$  NMR (400 MHz,  $\text{DMSO-}d_6$ ) of compound **16a**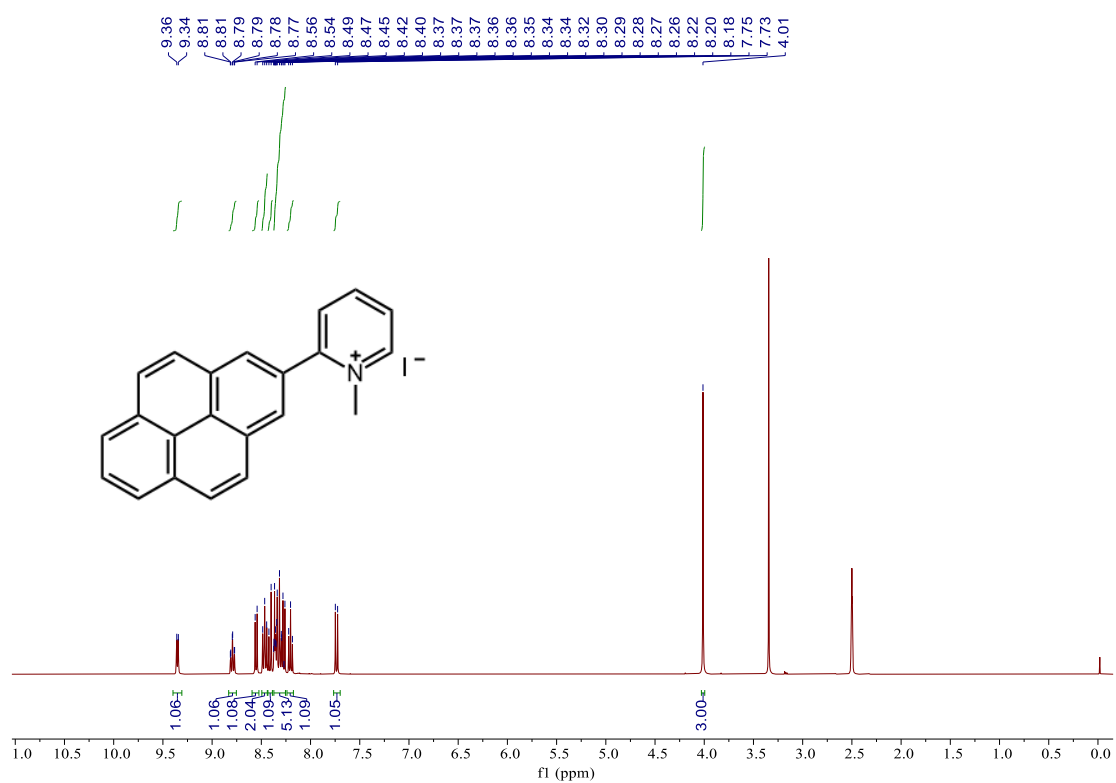

$^1\text{H}$  NMR (400 MHz,  $\text{DMSO-}d_6$ ) of compound **17a**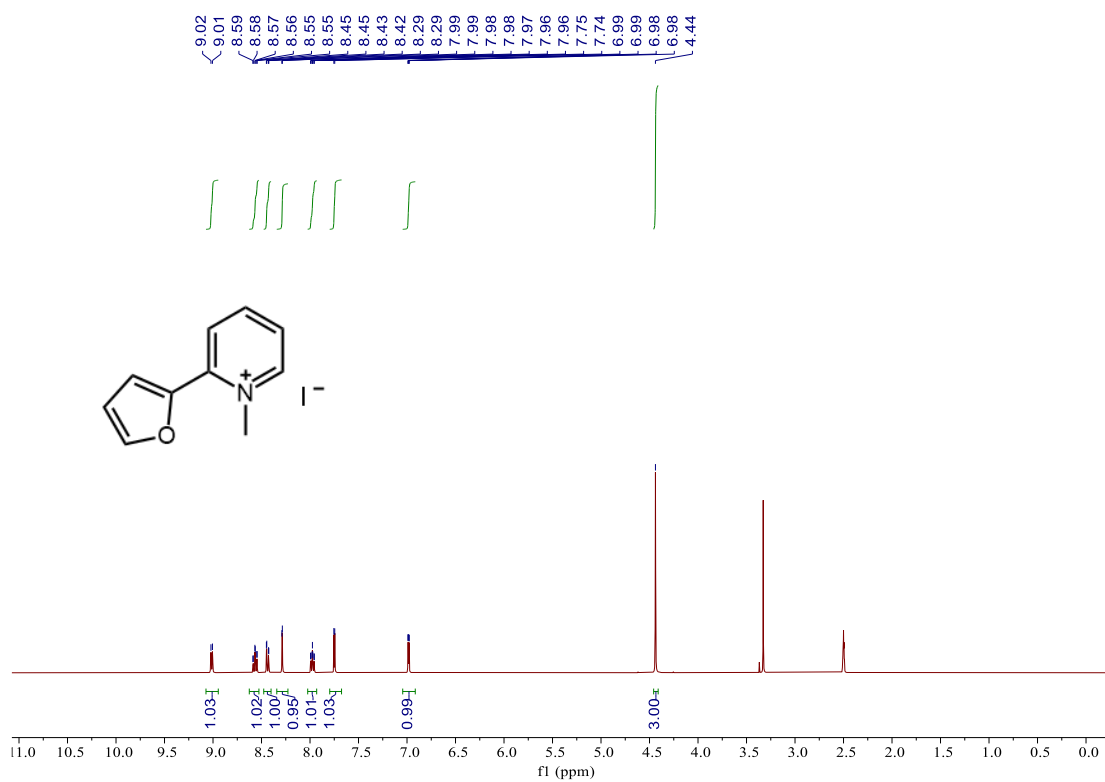 $^1\text{H}$  NMR (400 MHz,  $\text{DMSO-}d_6$ ) of compound **18a**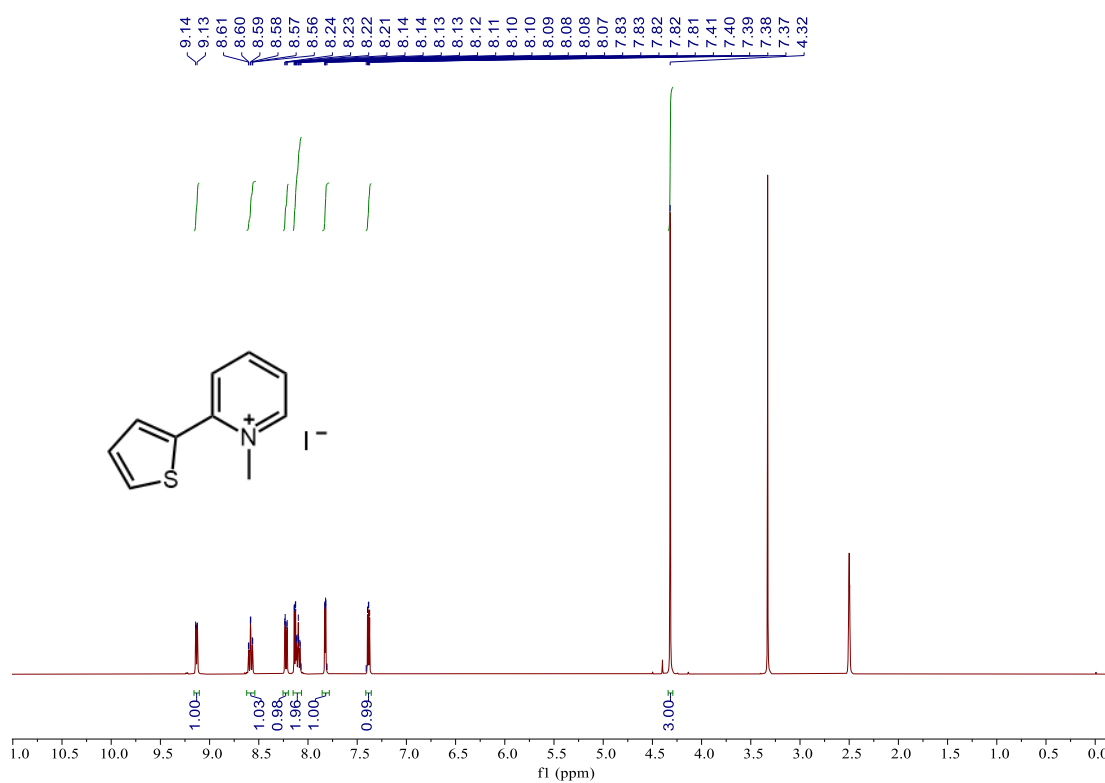

$^1\text{H}$  NMR (400 MHz,  $\text{DMSO-}d_6$ ) of compound **19a**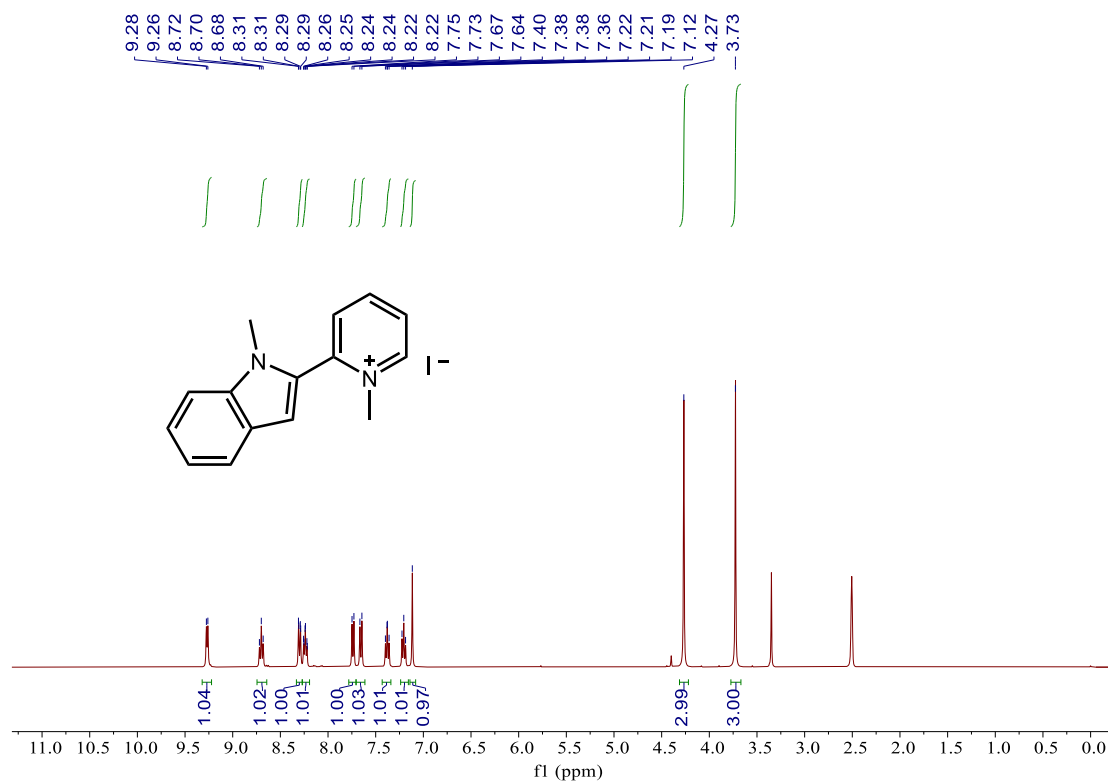 $^{13}\text{C}$  NMR (101 MHz,  $\text{DMSO-}d_6$ ) of compound **19a**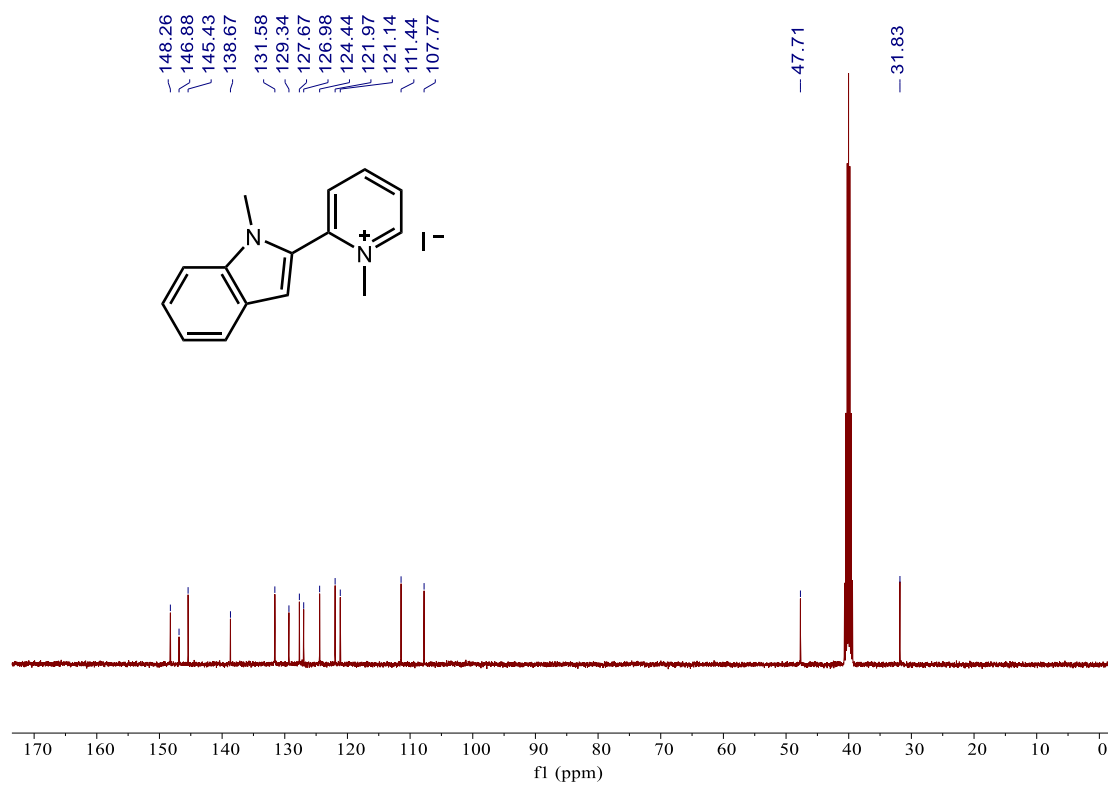

$^1\text{H}$  NMR (400 MHz,  $\text{DMSO-}d_6$ ) of compound **20a**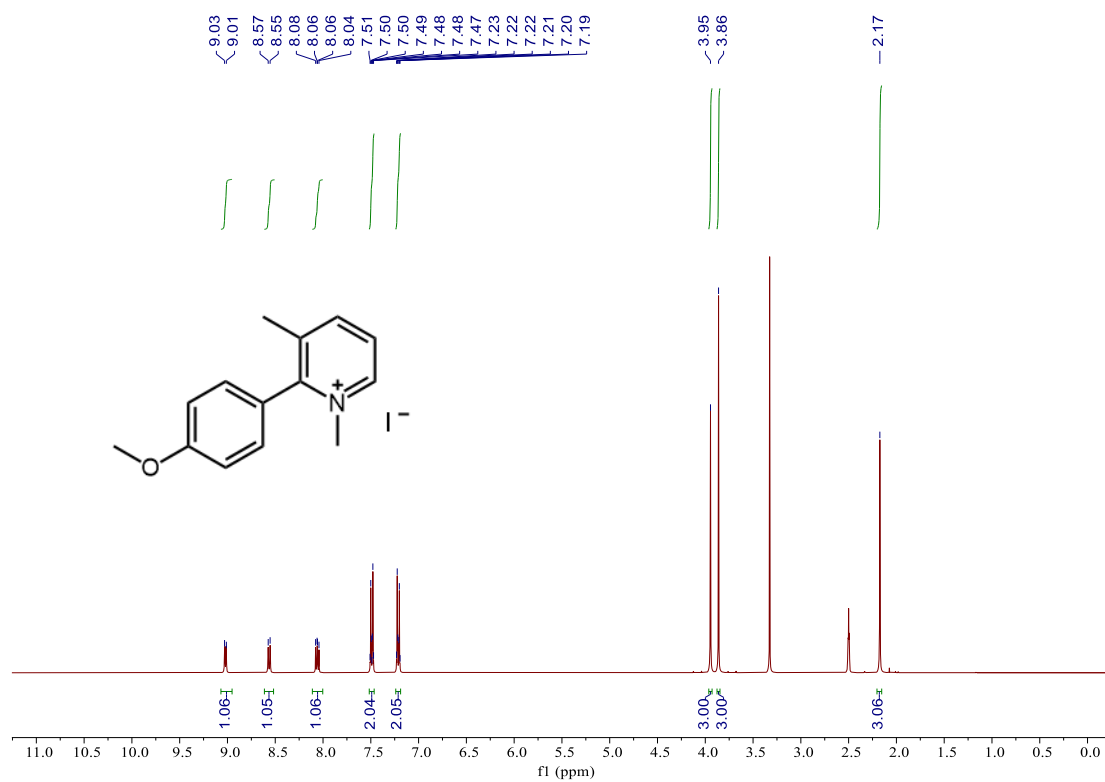 $^1\text{H}$  NMR (400 MHz,  $\text{DMSO-}d_6$ ) of compound **21a**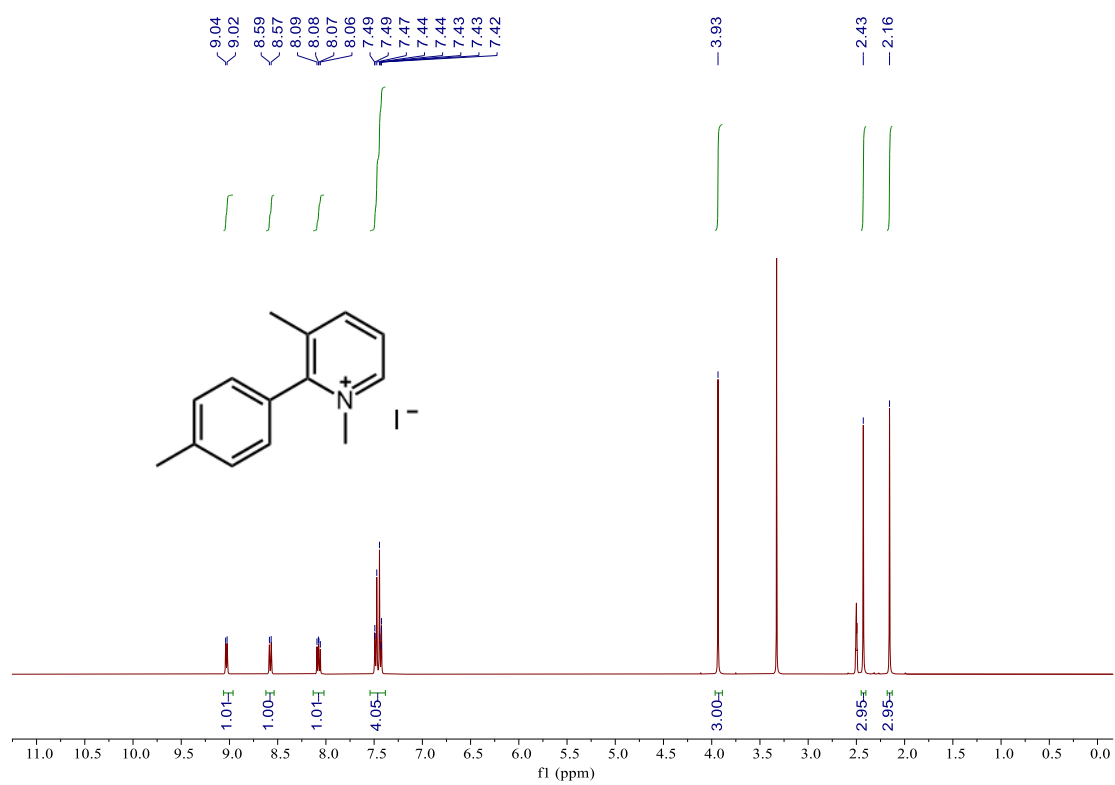

$^1\text{H}$  NMR (400 MHz,  $\text{DMSO-}d_6$ ) of compound **22a**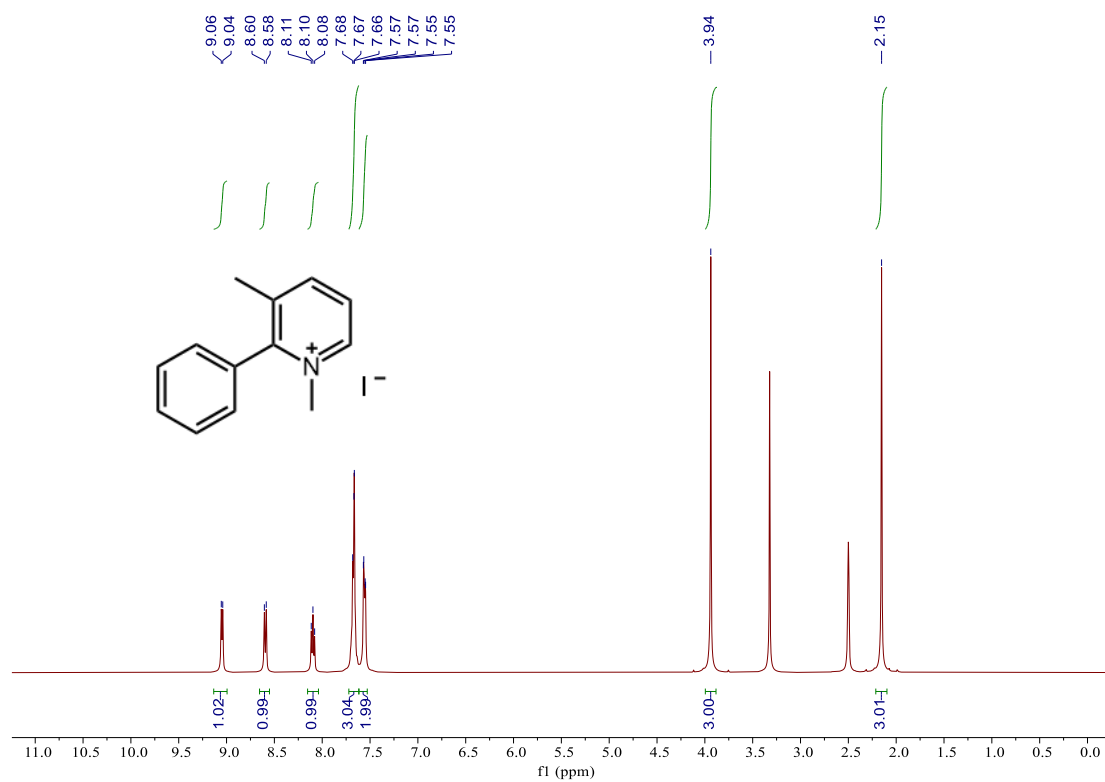 $^1\text{H}$  NMR (400 MHz,  $\text{DMSO-}d_6$ ) of compound **23a**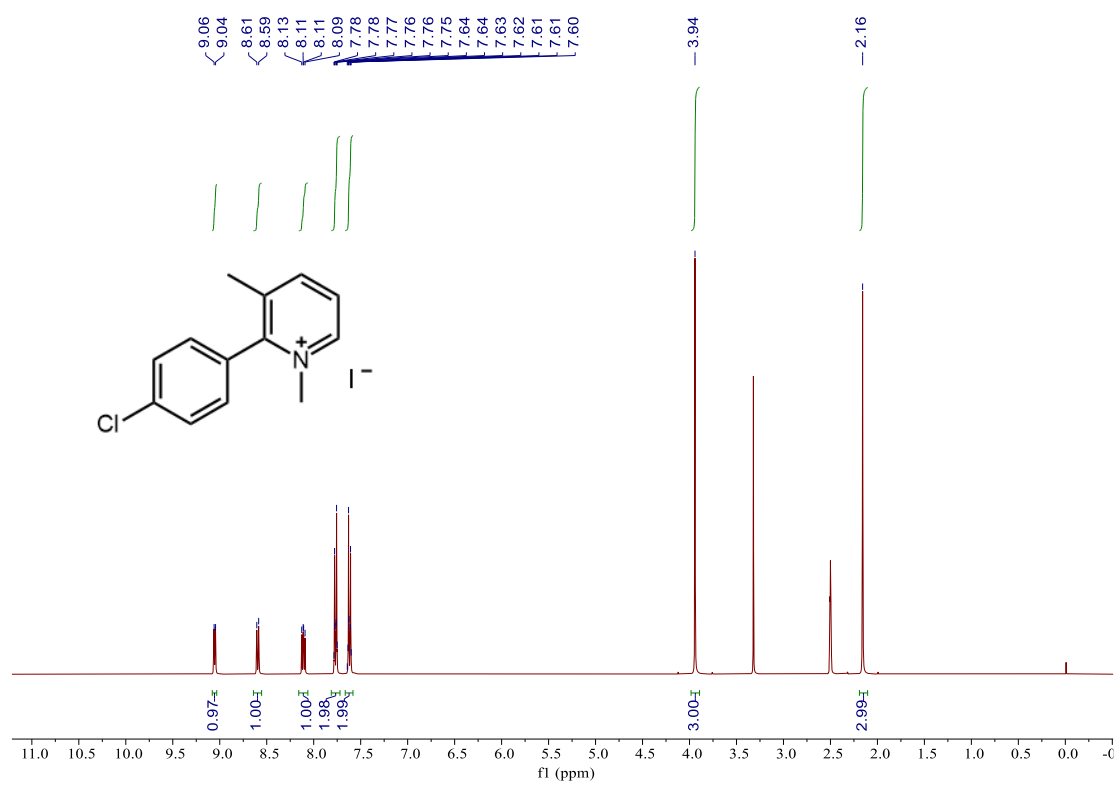

$^1\text{H}$  NMR (400 MHz,  $\text{DMSO-}d_6$ ) of compound **24a**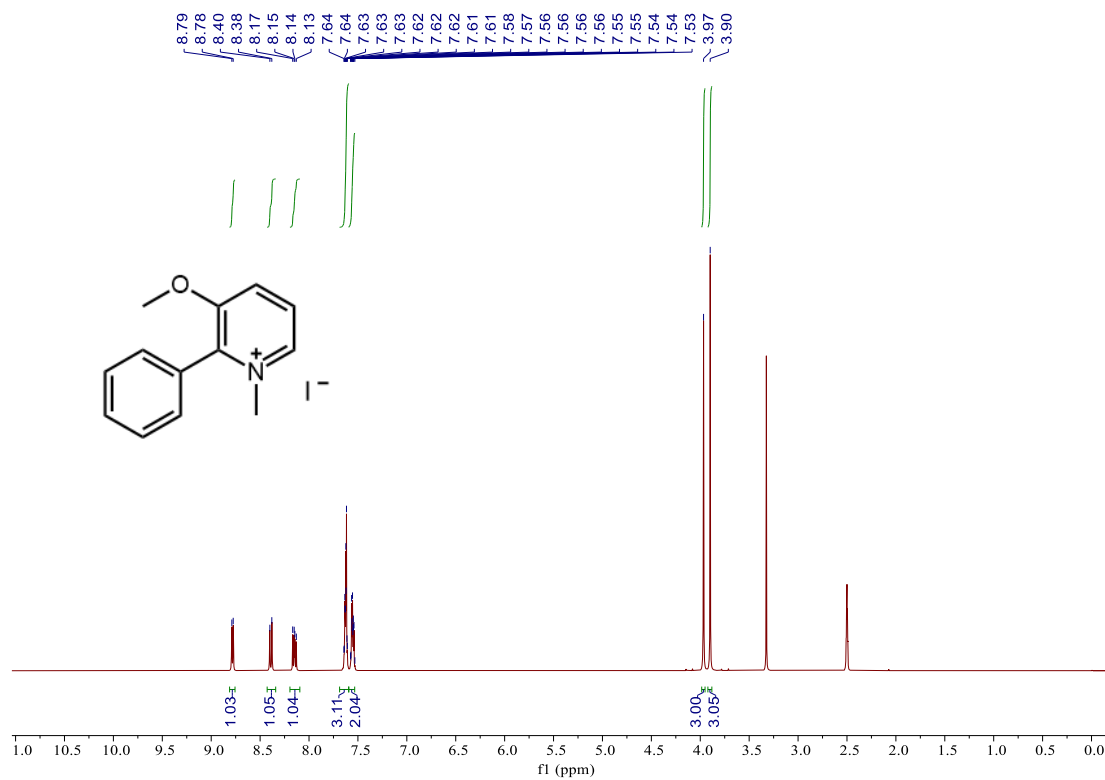 $^1\text{H}$  NMR (400 MHz,  $\text{DMSO-}d_6$ ) of compound **25a**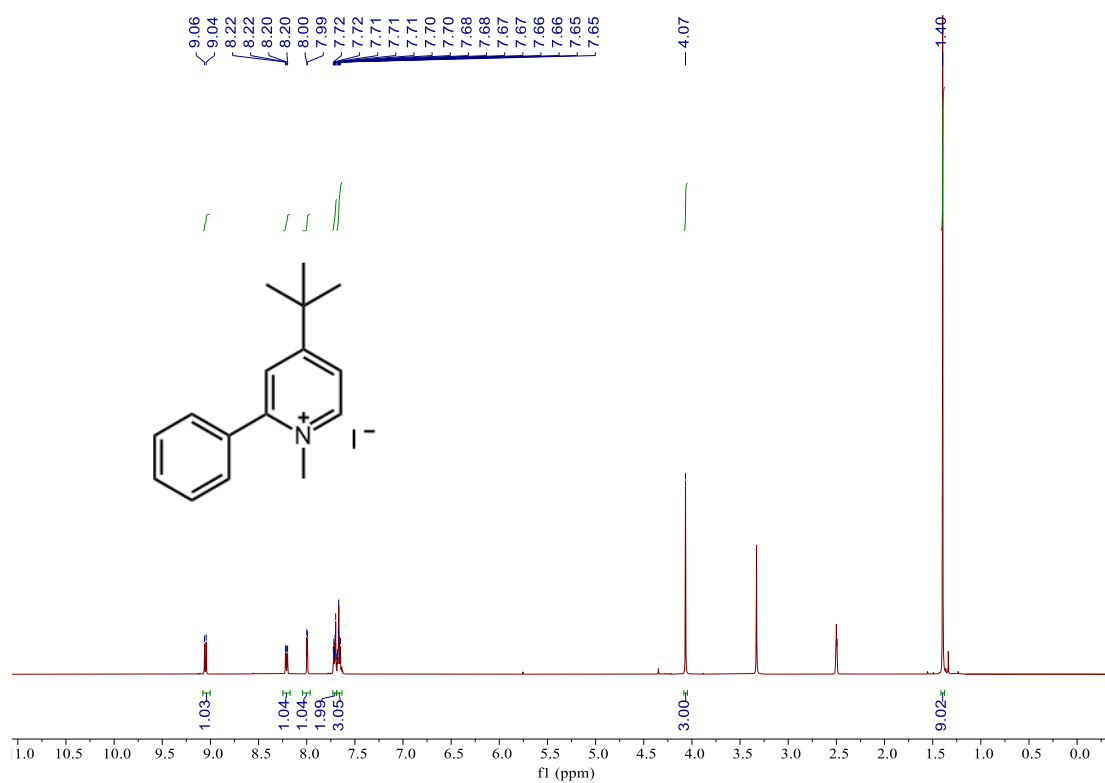

$^1\text{H}$  NMR (400 MHz,  $\text{DMSO-}d_6$ ) of compound **26a**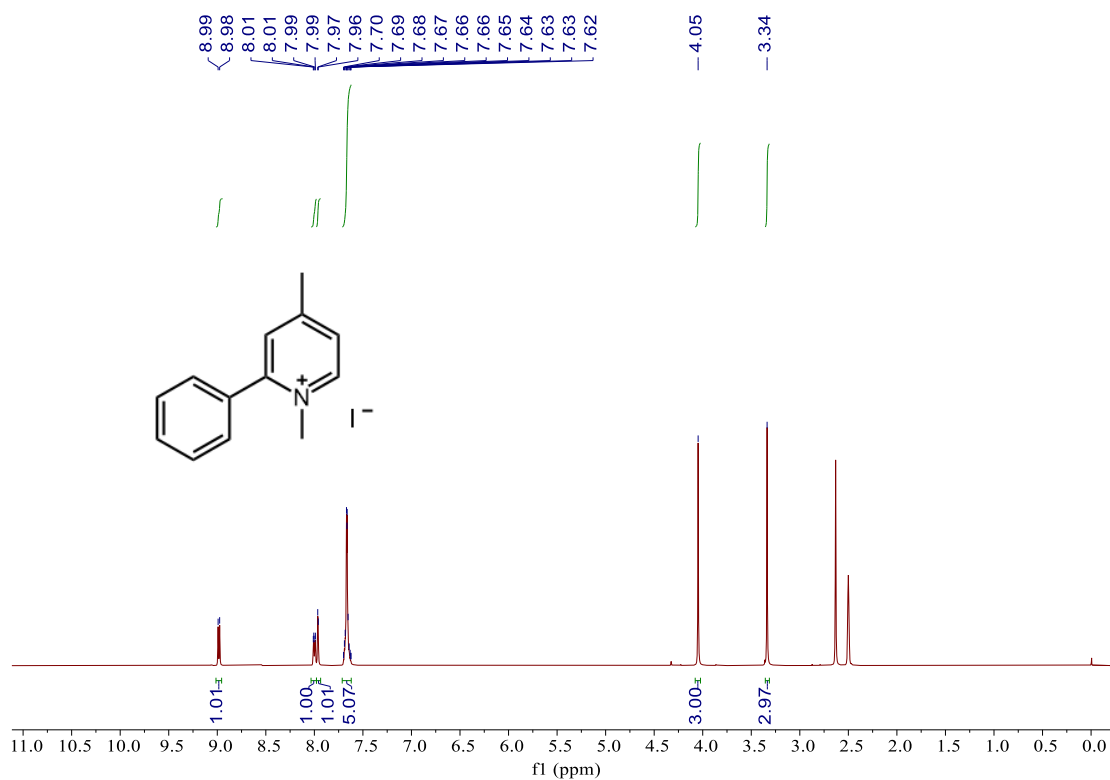 $^1\text{H}$  NMR (400 MHz,  $\text{DMSO-}d_6$ ) of compound **27a**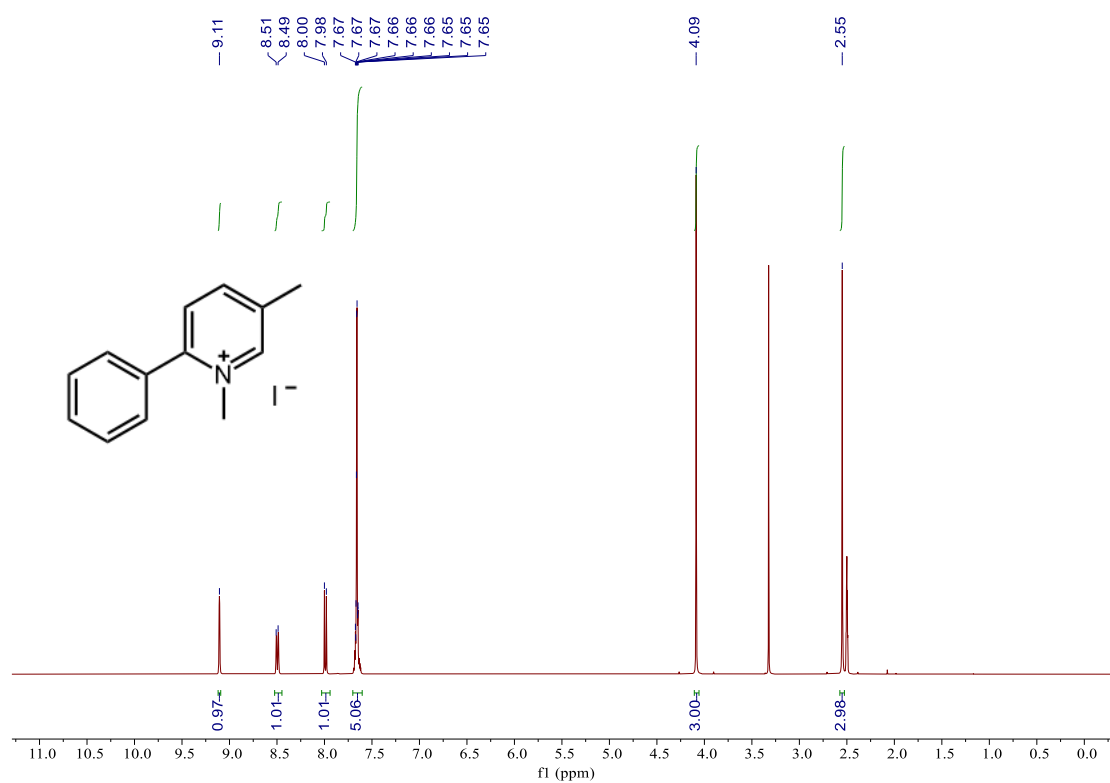

$^1\text{H}$  NMR (400 MHz,  $\text{DMSO-}d_6$ ) of compound **28a**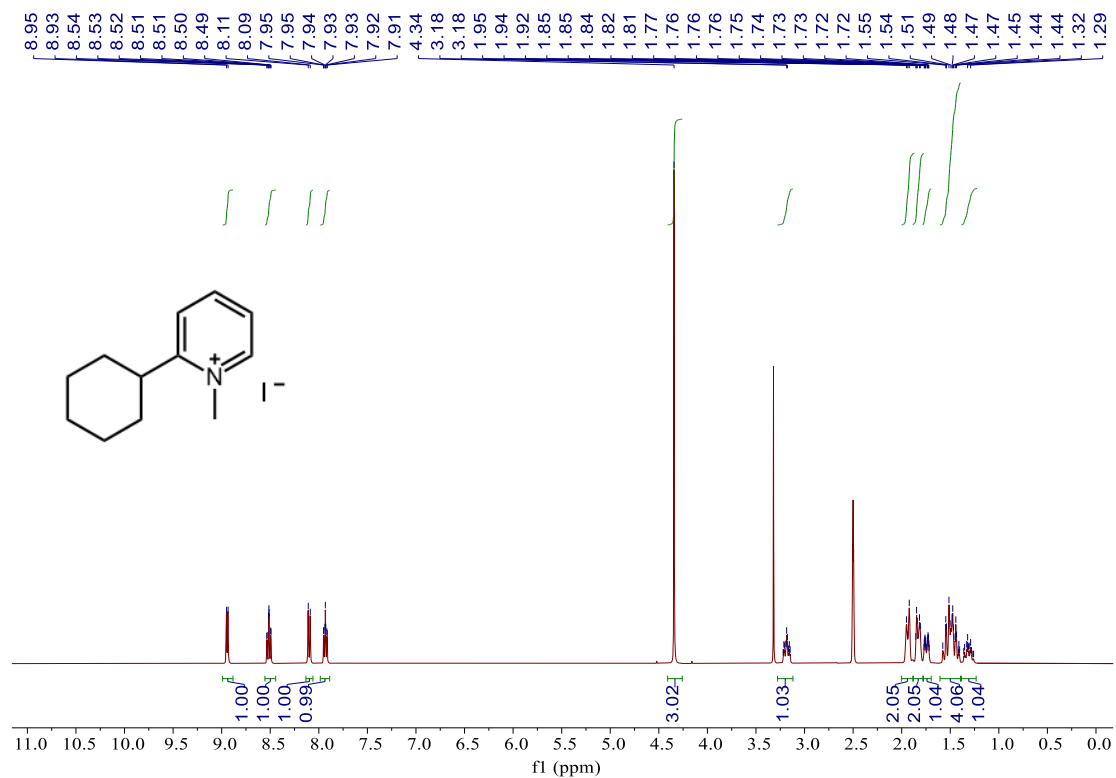 $^1\text{H}$  NMR (400 MHz,  $\text{DMSO-}d_6$ ) of compound **29a**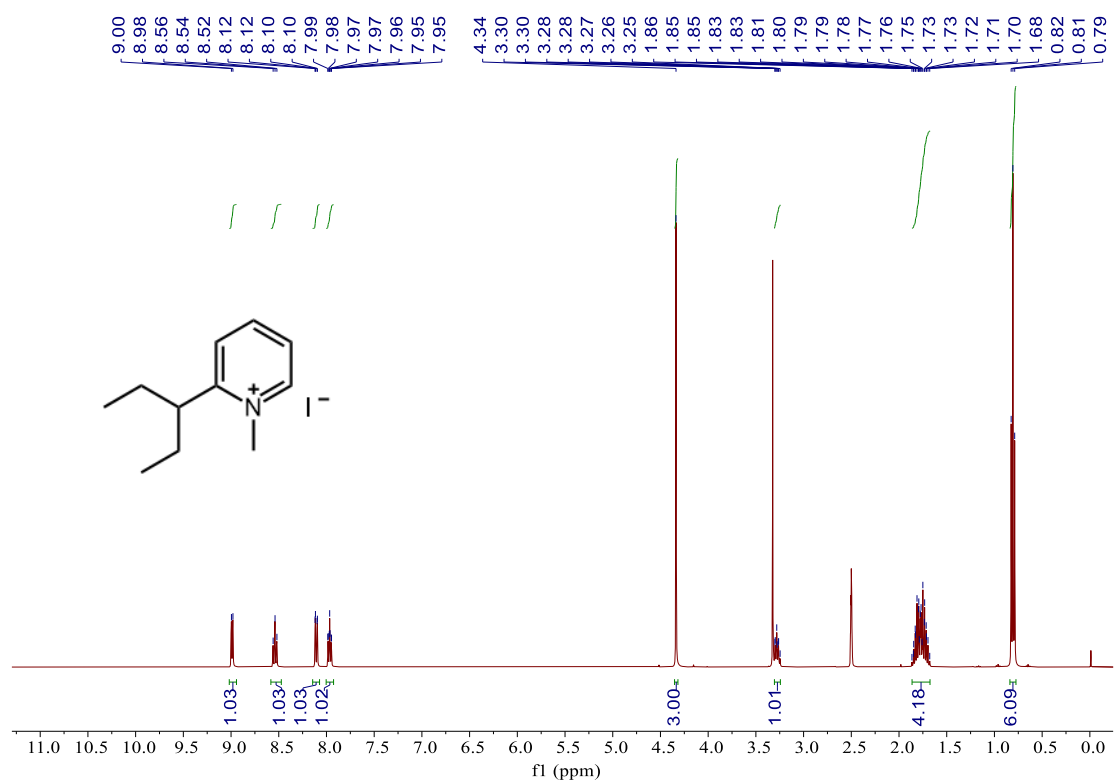

$^1\text{H}$  NMR (400 MHz,  $\text{DMSO-}d_6$ ) of compound **30a**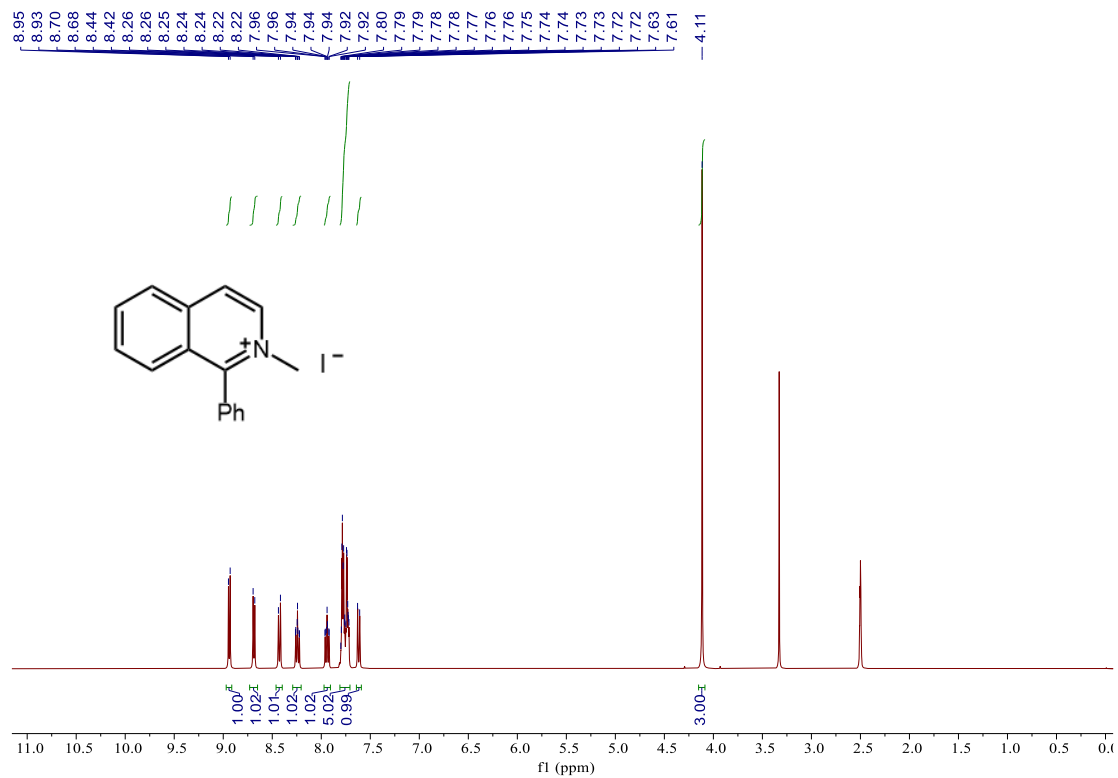 $^1\text{H}$  NMR (400 MHz,  $\text{DMSO-}d_6$ ) of compound **31a**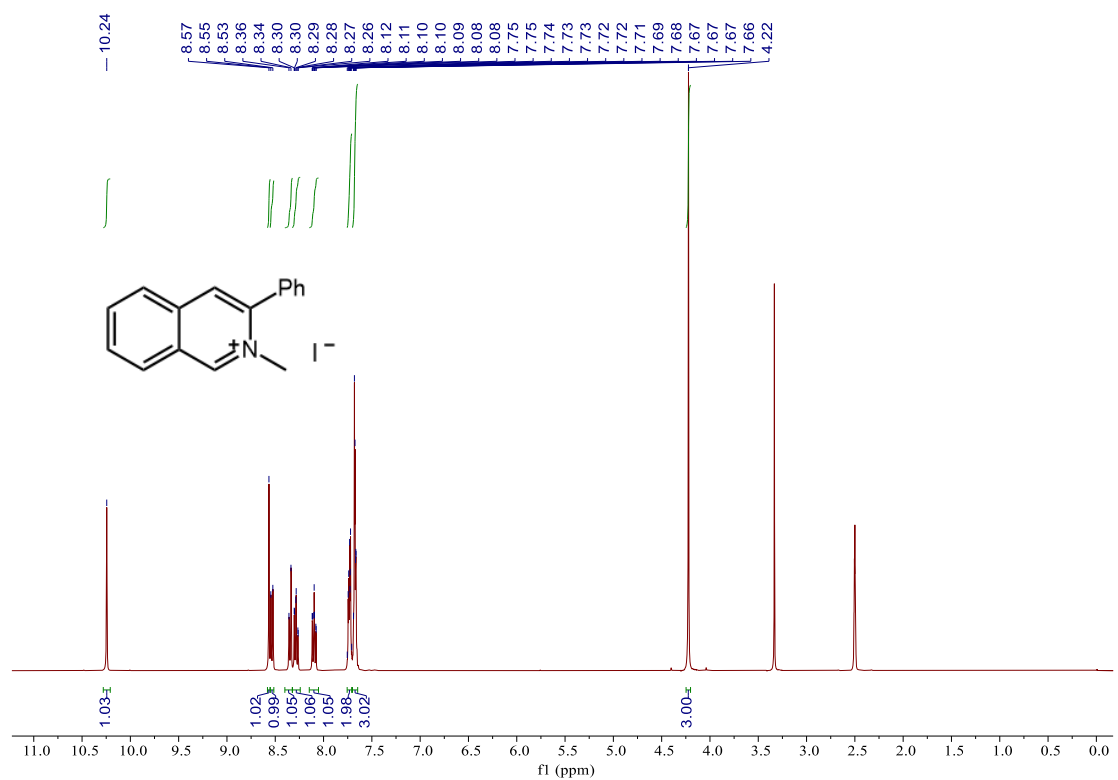

$^{13}\text{C}$  NMR (101 MHz,  $\text{DMSO-}d_6$ ) of compound **31a**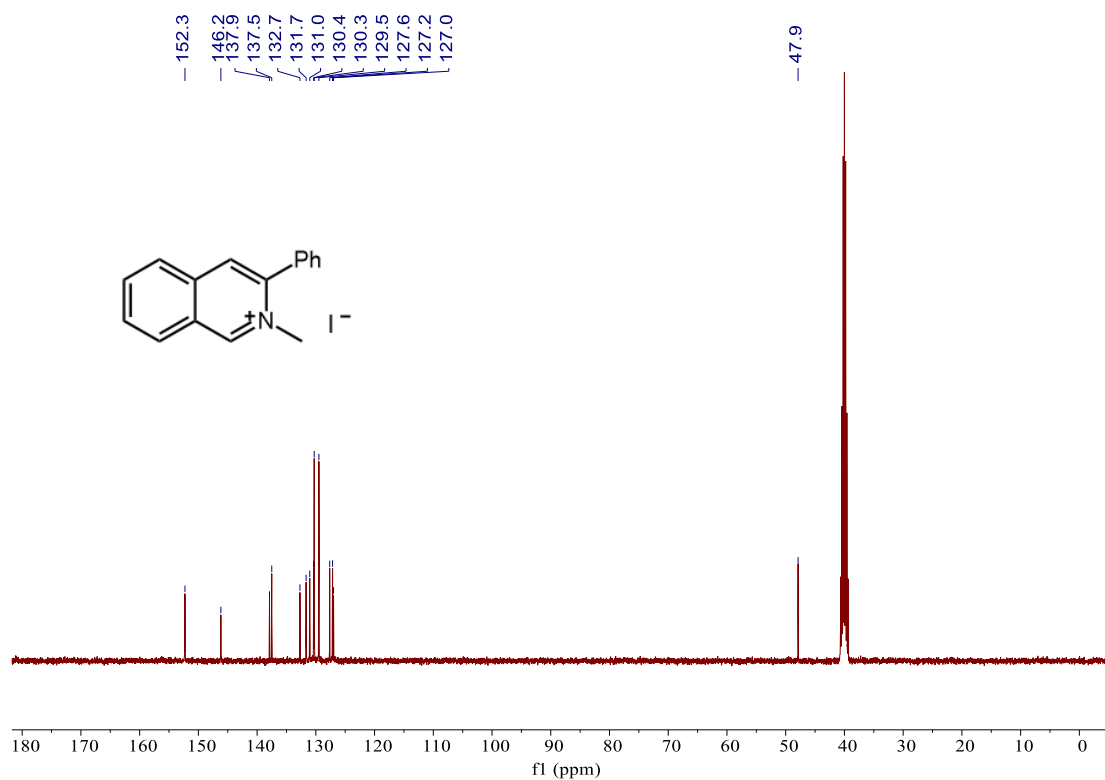 $^1\text{H}$  NMR (400 MHz,  $\text{DMSO-}d_6$ ) of compound **32a**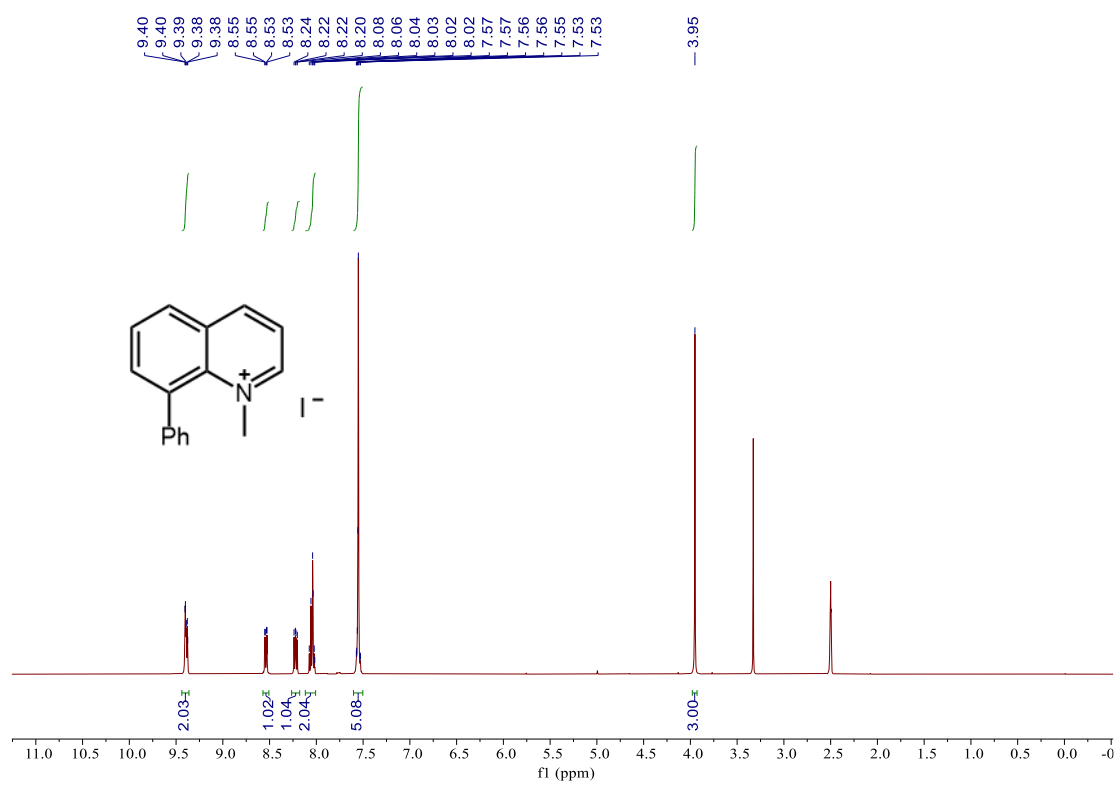

$^{13}\text{C}$  NMR (101 MHz,  $\text{DMSO-}d_6$ ) of compound **32a**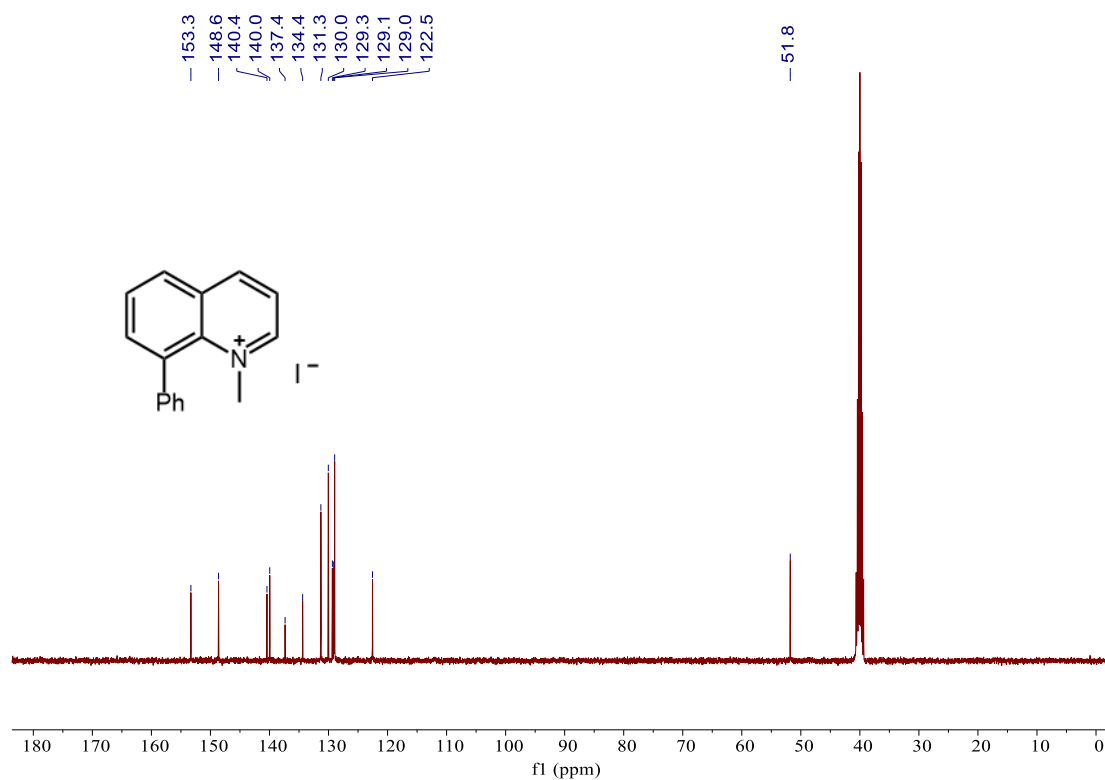 $^1\text{H}$  NMR (400 MHz,  $\text{DMSO-}d_6$ ) of compound **33a**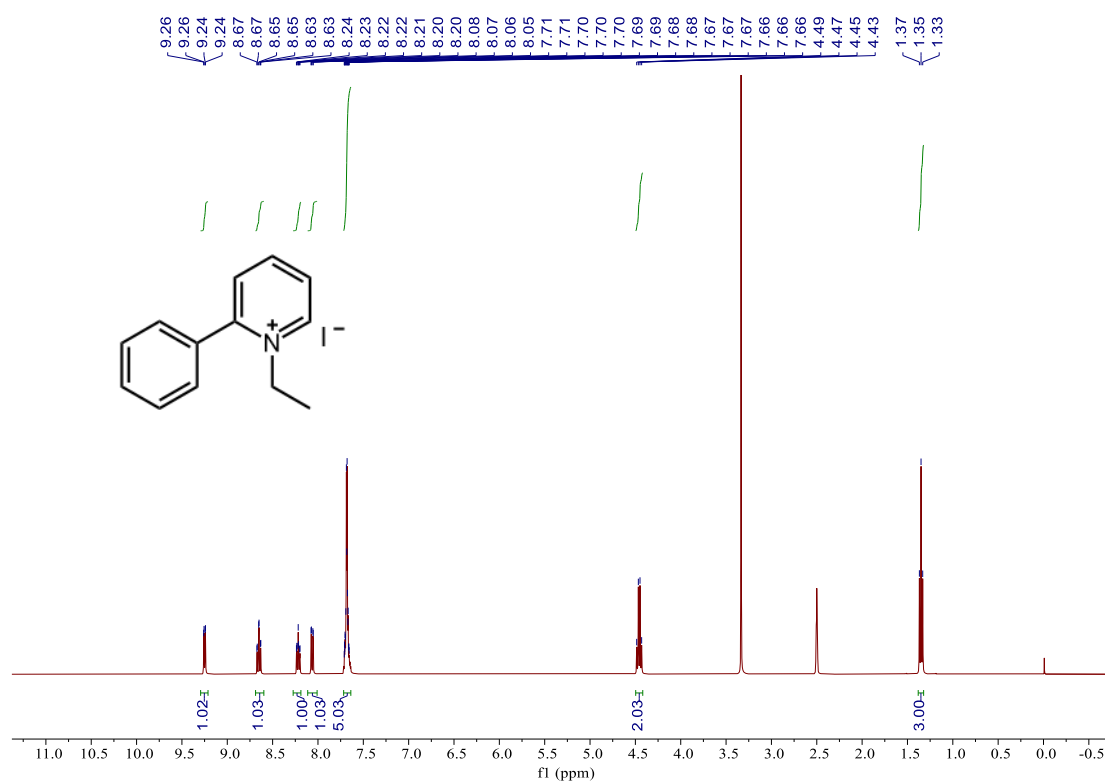

$^1\text{H}$  NMR (400 MHz,  $\text{DMSO-}d_6$ ) of compound **34a**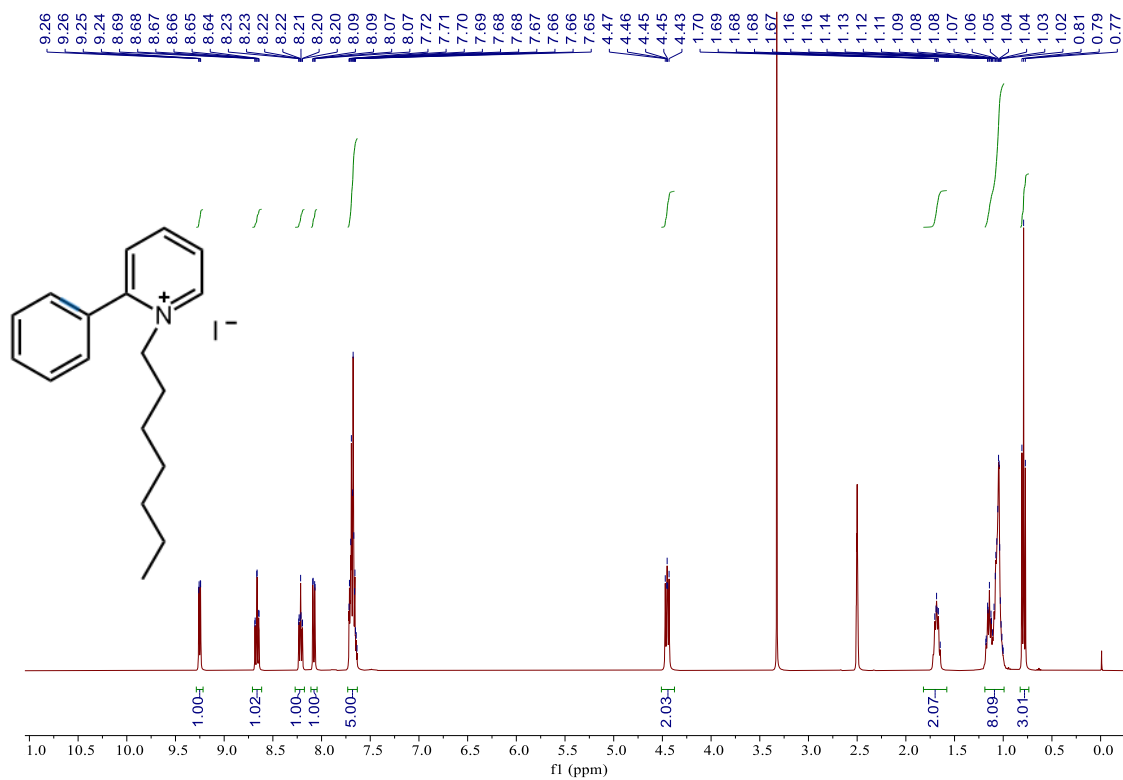 $^{13}\text{C}$  NMR (101 MHz,  $\text{DMSO-}d_6$ ) of compound **34a**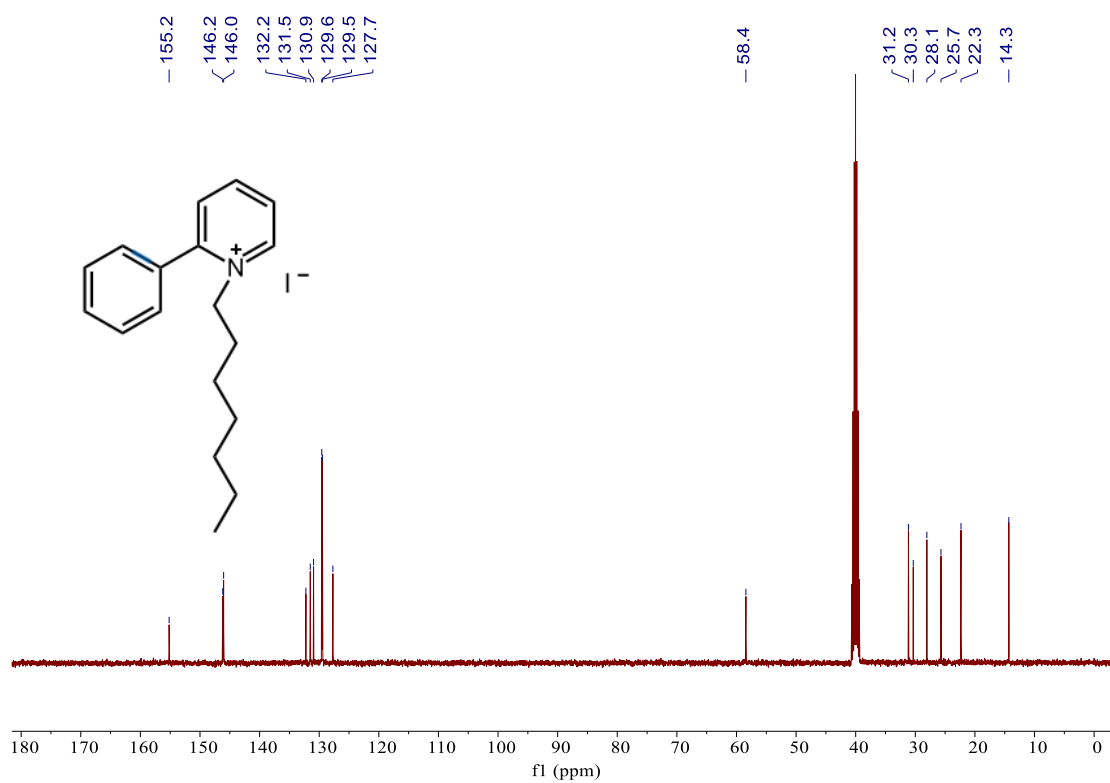

$^1\text{H}$  NMR (400 MHz,  $\text{DMSO-}d_6$ ) of compound **35a**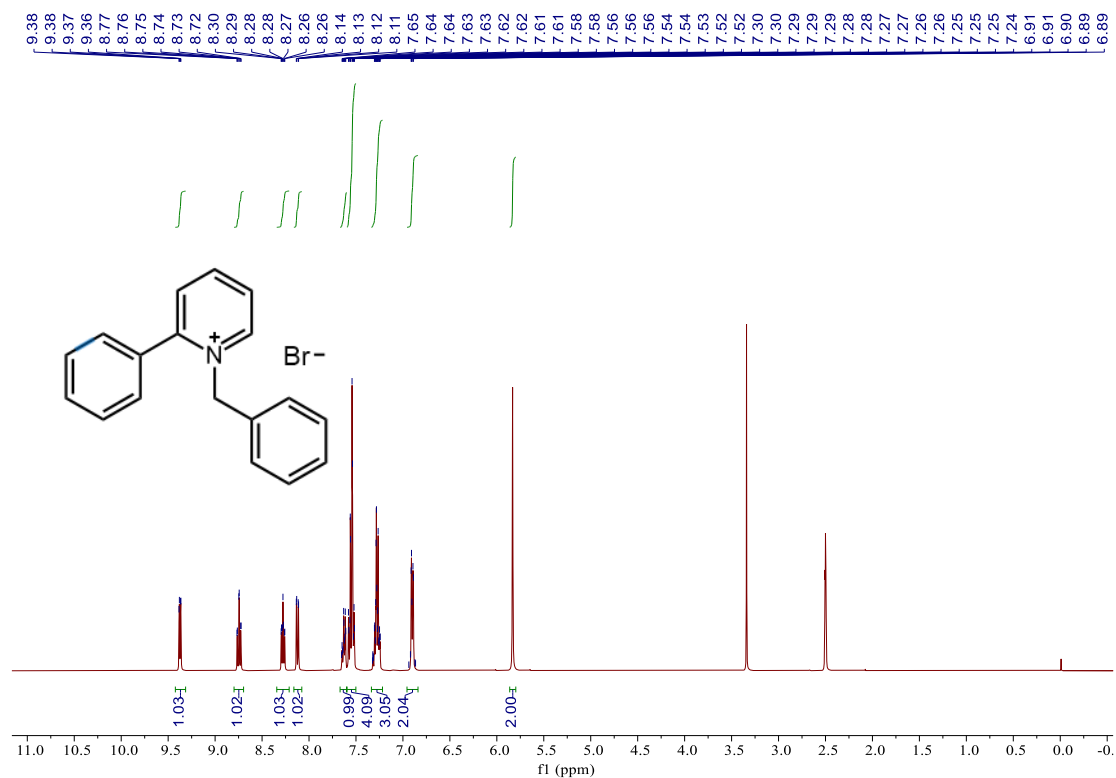 $^1\text{H}$  NMR (400 MHz,  $\text{DMSO-}d_6$ ) of compound **36a**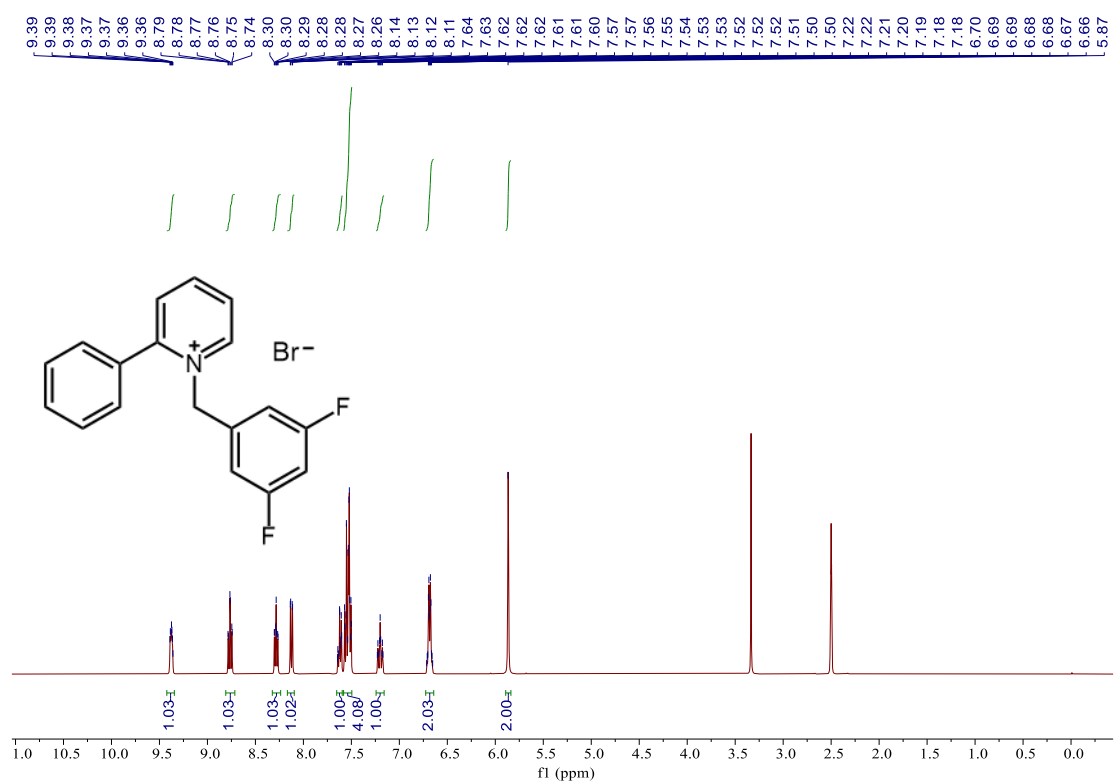

$^{19}\text{F}$  NMR (400 MHz,  $\text{DMSO-}d_6$ ) of compound **36a**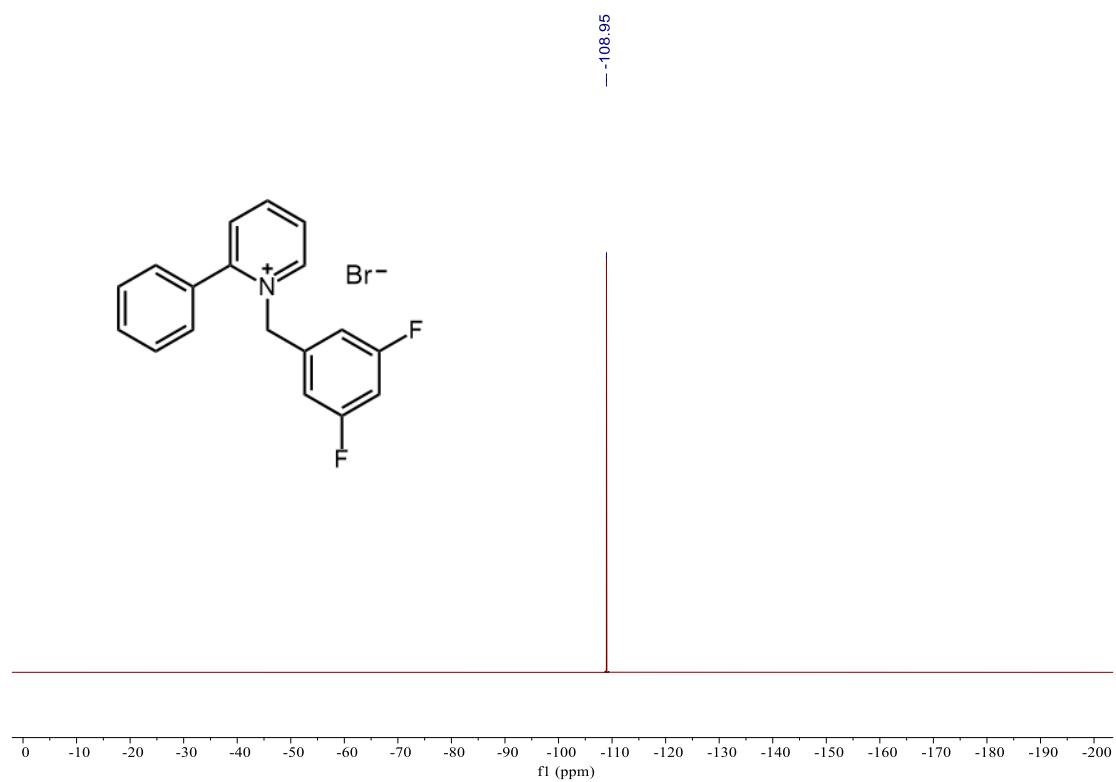 $^{13}\text{C}$  NMR (101 MHz,  $\text{DMSO-}d_6$ ) of compound **36a**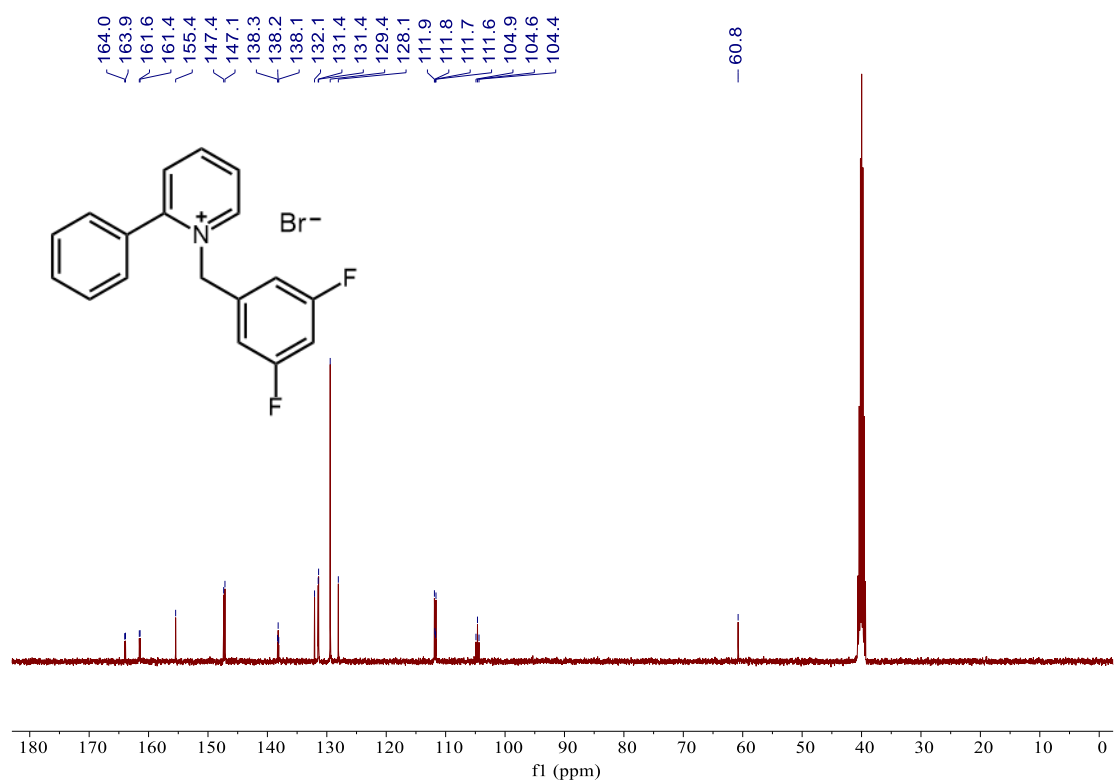

$^1\text{H}$  NMR (400 MHz,  $\text{DMSO-}d_6$ ) of compound **37a**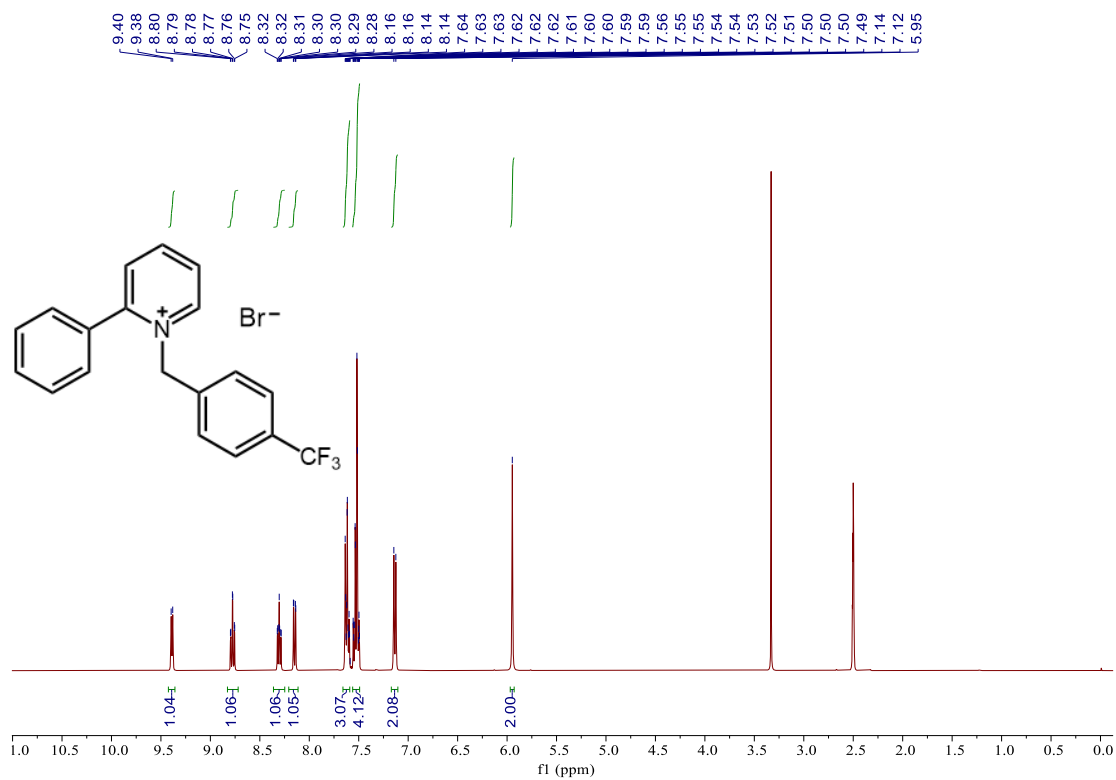 $^{19}\text{F}$  NMR (400 MHz,  $\text{DMSO-}d_6$ ) of compound **37a**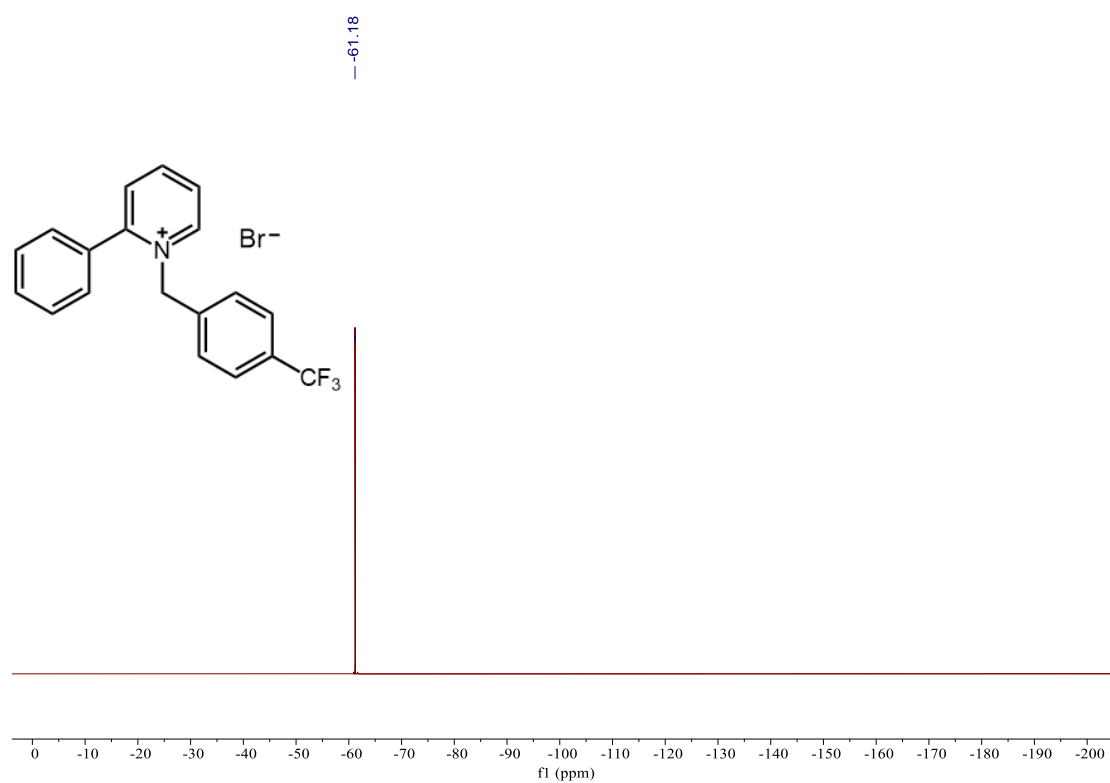

$^{13}\text{C}$  NMR (101 MHz,  $\text{DMSO-}d_6$ ) of compound **37a**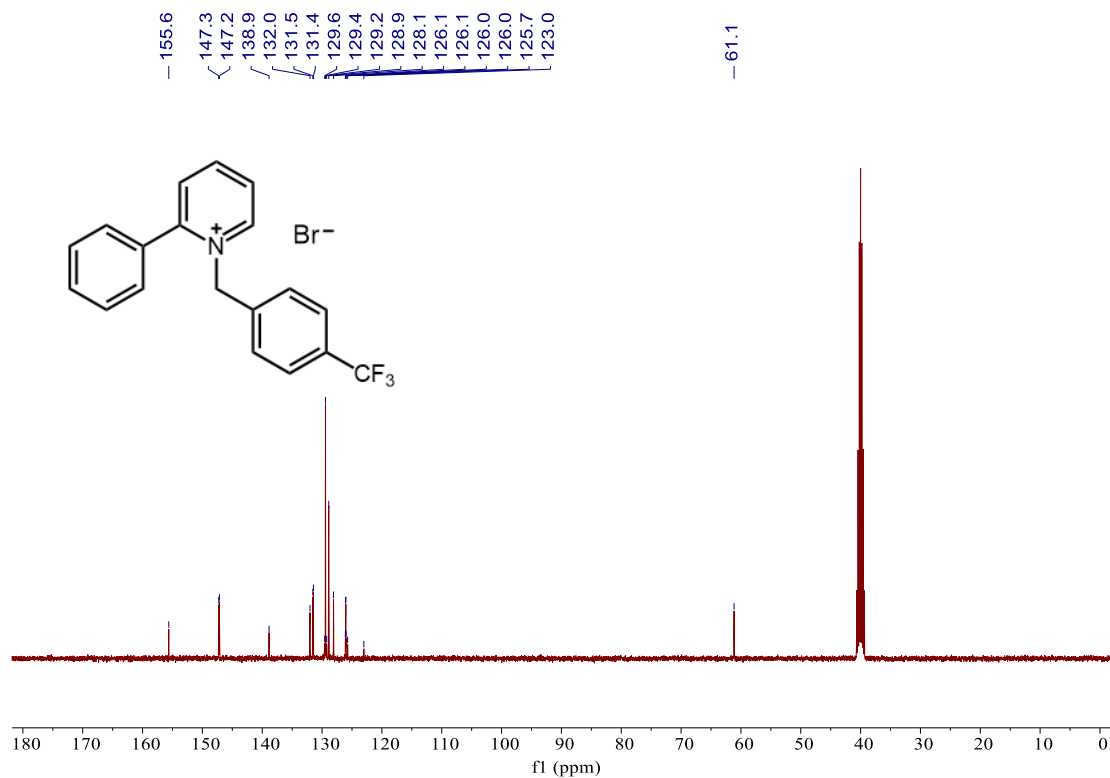 $^1\text{H}$  NMR (400 MHz,  $\text{DMSO-}d_6$ ) of compound **38a**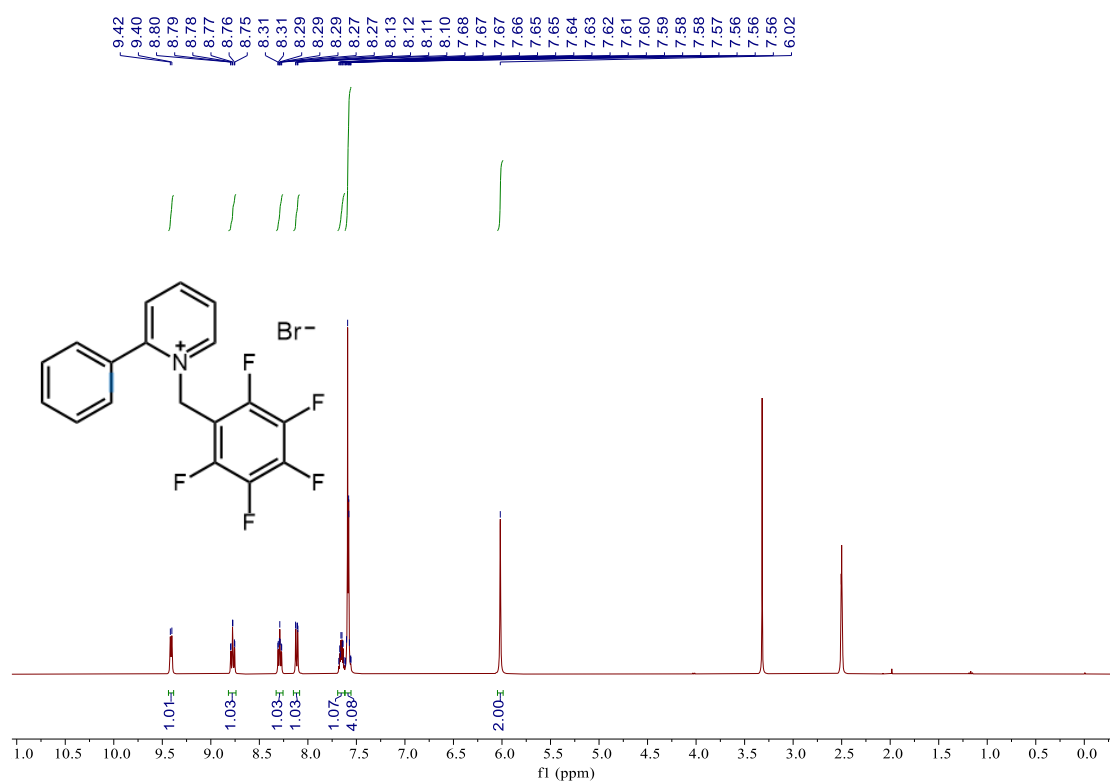

$^{19}\text{F}$  NMR (400 MHz,  $\text{DMSO-}d_6$ ) of compound **38a**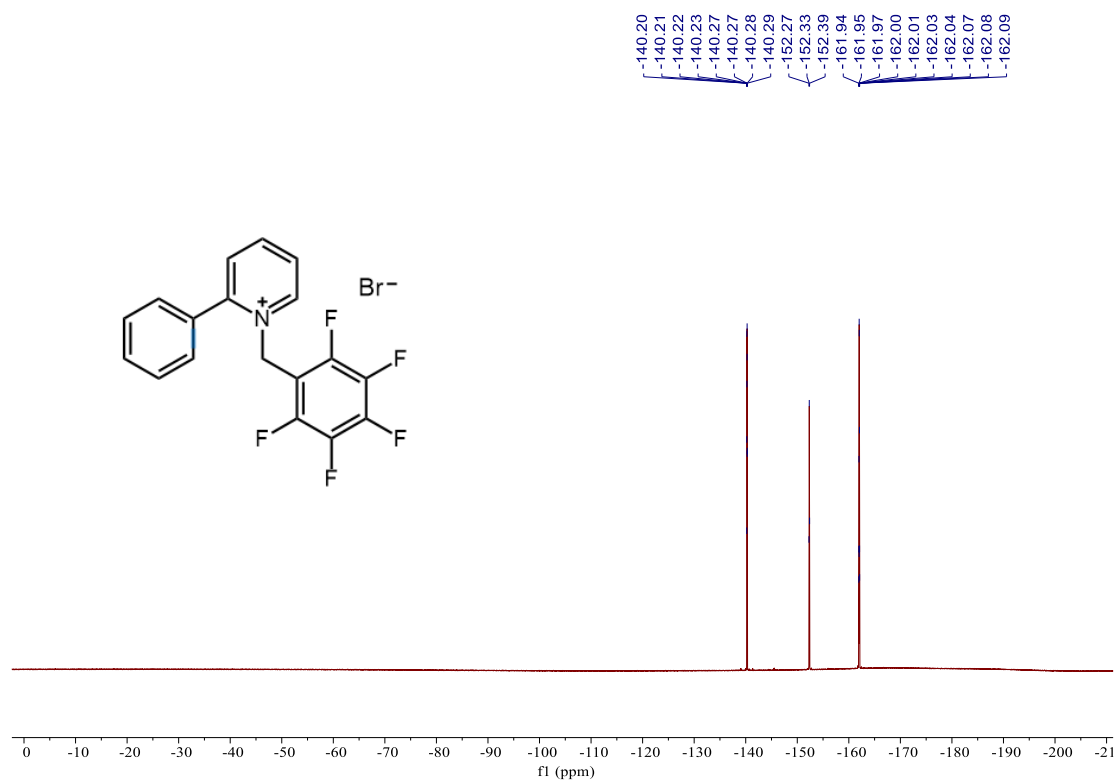 $^{13}\text{C}$  NMR (101 MHz,  $\text{DMSO-}d_6$ ) of compound **38a**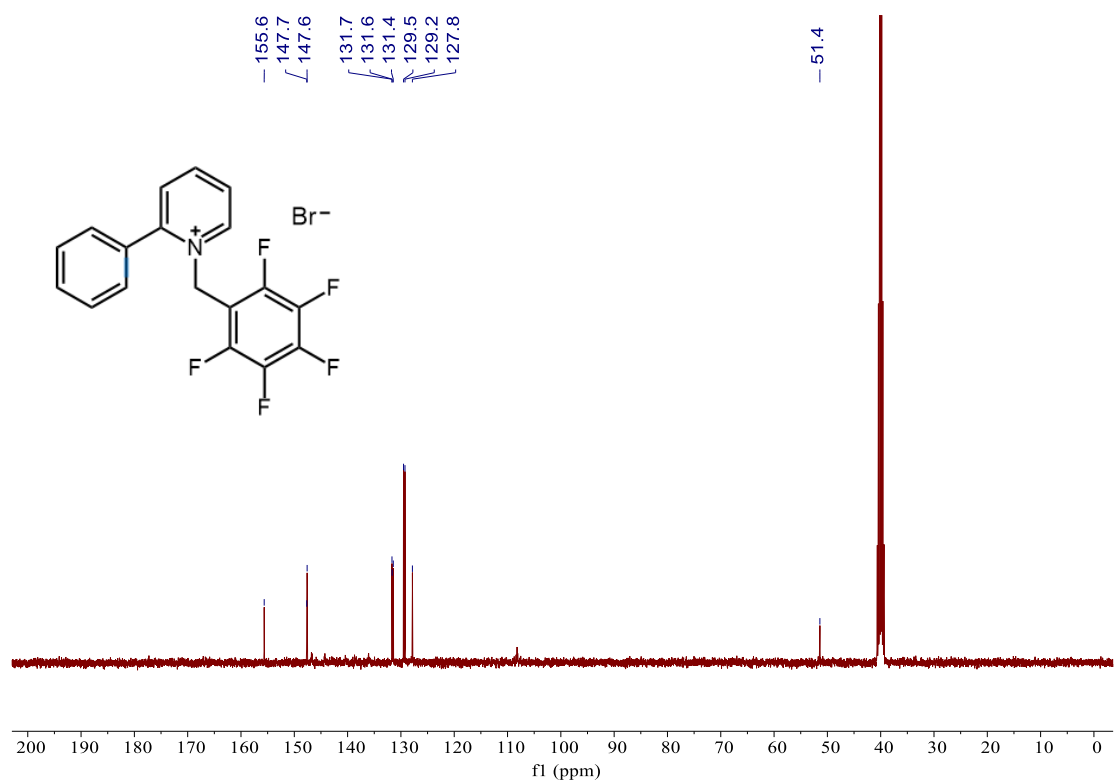

$^1\text{H}$  NMR (400 MHz,  $\text{DMSO-}d_6$ ) of compound **39a**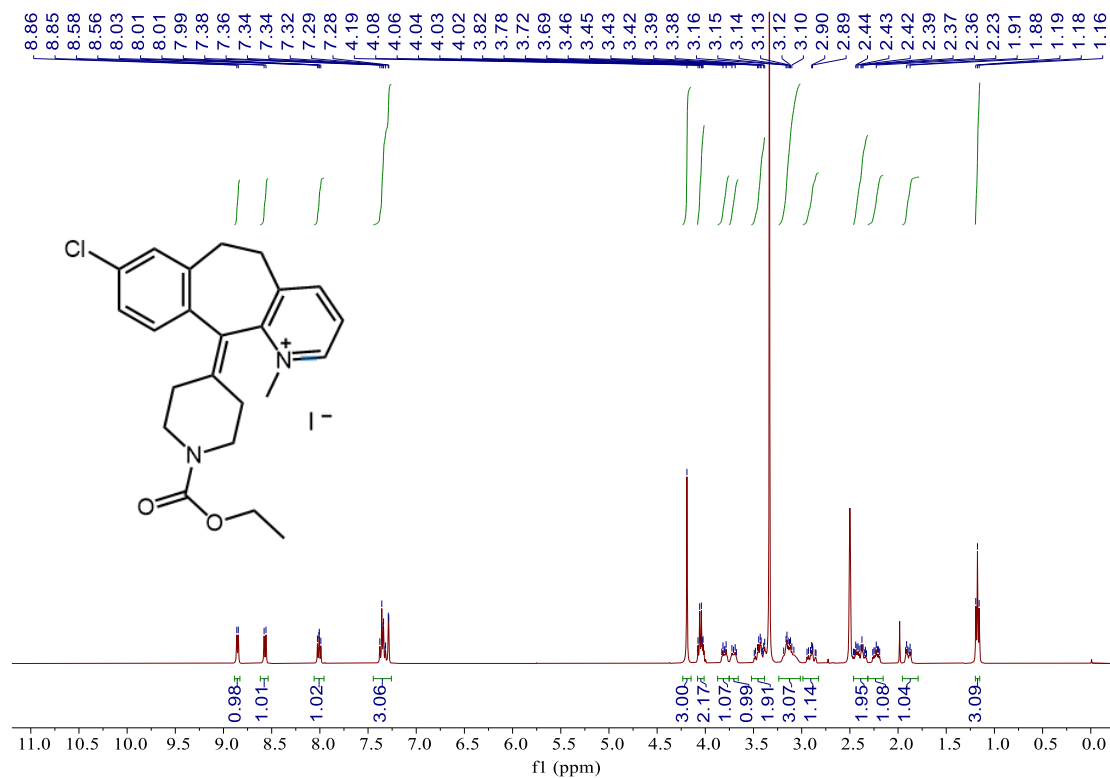 $^{13}\text{C}$  NMR (101 MHz,  $\text{DMSO-}d_6$ ) of compound **39a**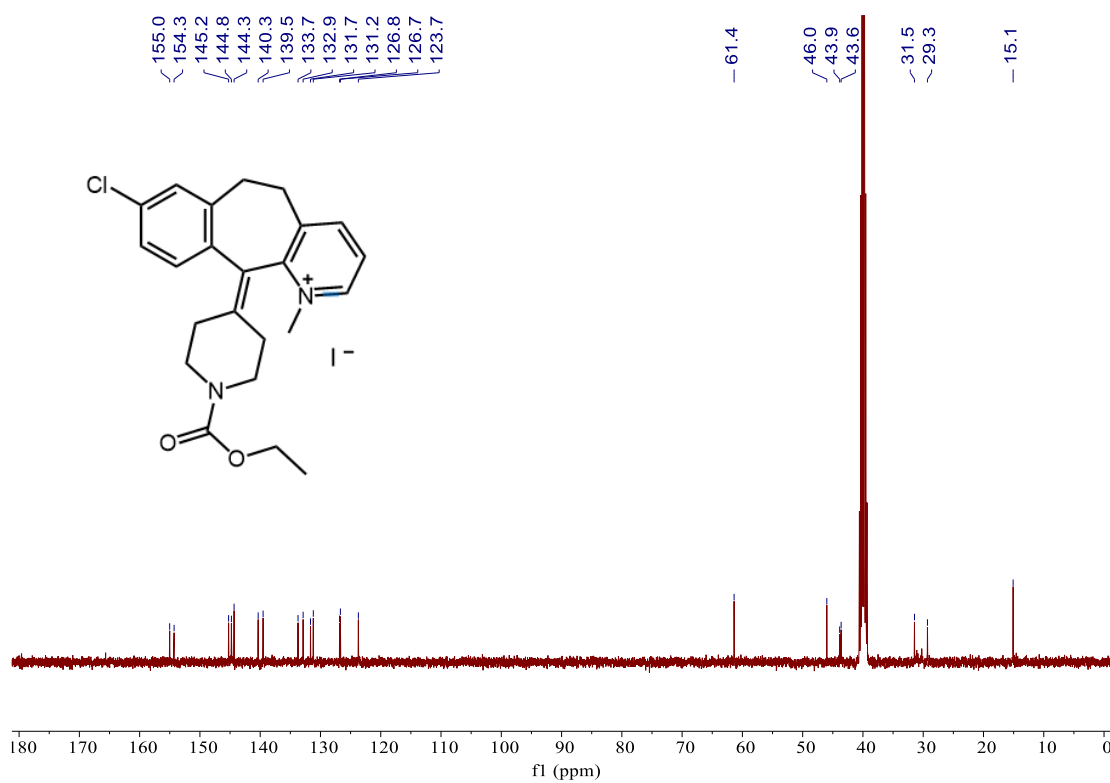

$^1\text{H}$  NMR (400 MHz,  $\text{DMSO-}d_6$ ) of compound **40a**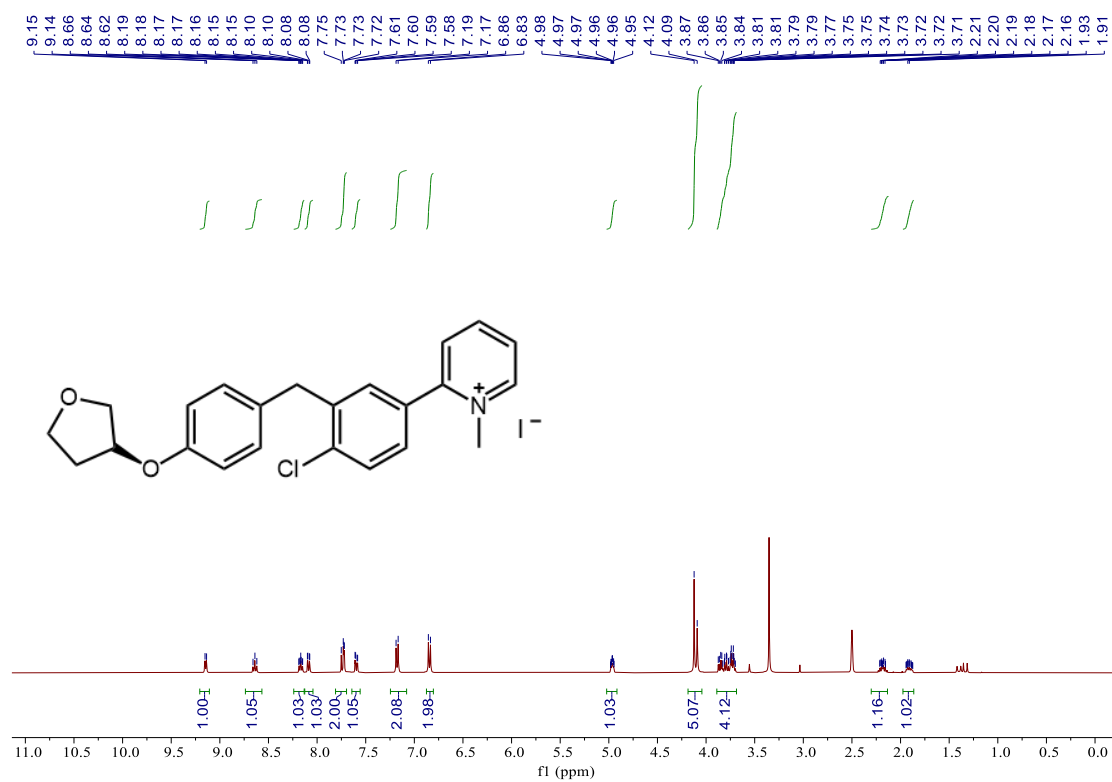 $^{13}\text{C}$  NMR (101 MHz,  $\text{DMSO-}d_6$ ) of compound **40a**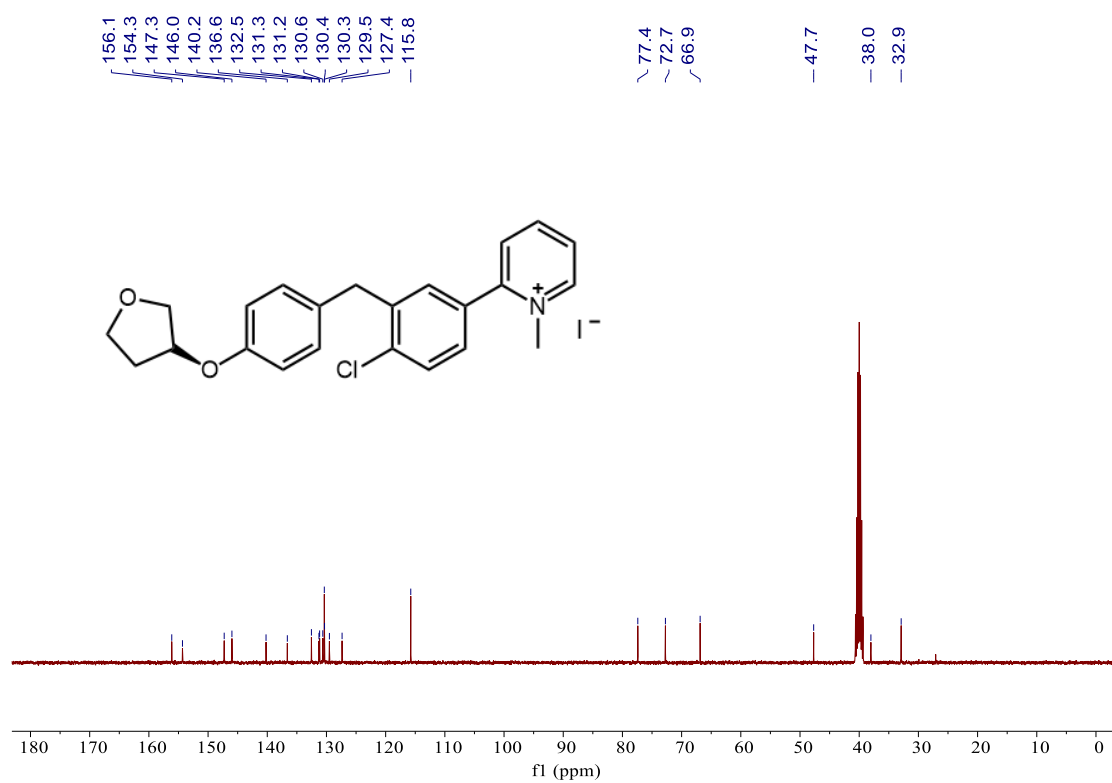



$^1\text{H}$  NMR (400 MHz,  $\text{DMSO-}d_6$ ) of compound **42a**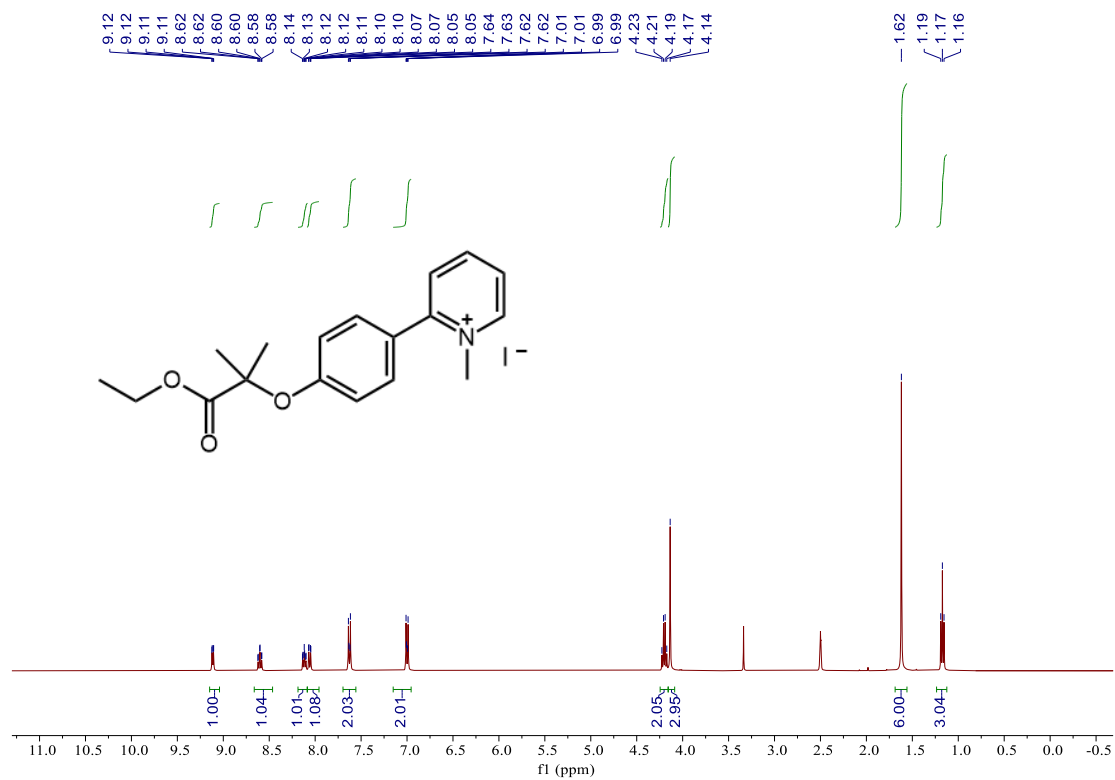 $^{13}\text{C}$  NMR (101 MHz,  $\text{DMSO-}d_6$ ) of compound **42a**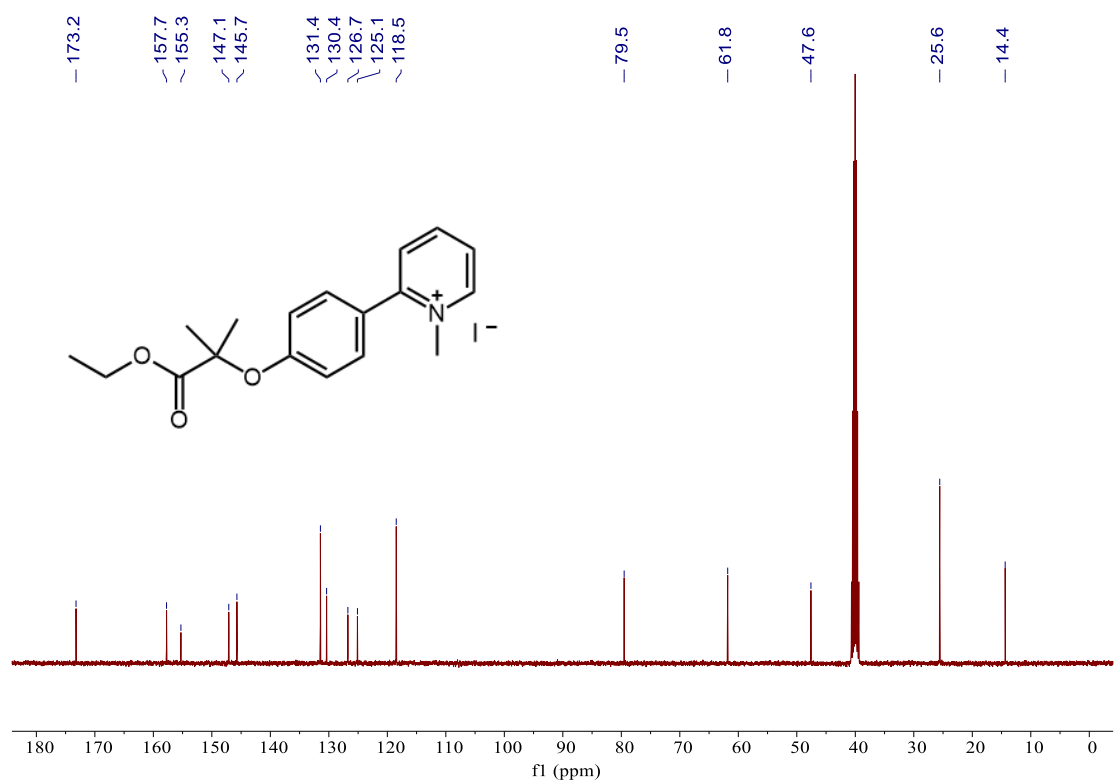

$^1\text{H}$  NMR (400 MHz,  $\text{DMSO-}d_6$ ) of compound **43a**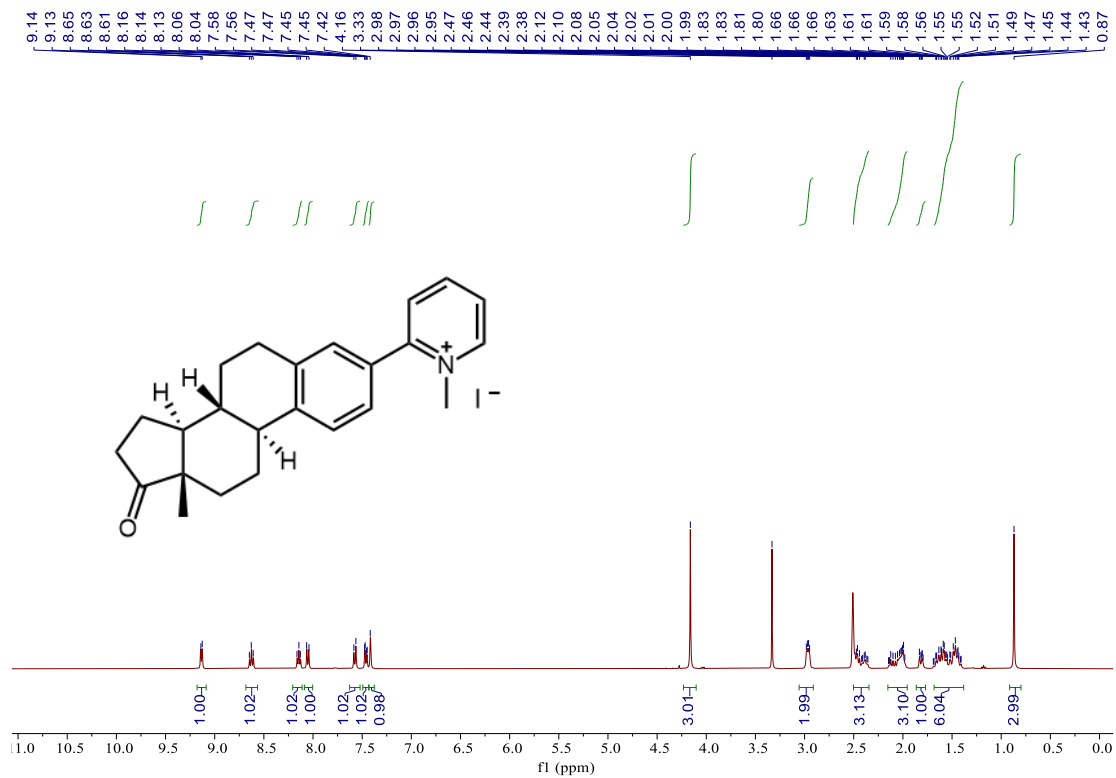 $^{13}\text{C}$  NMR (101 MHz,  $\text{DMSO-}d_6$ ) of compound **43a**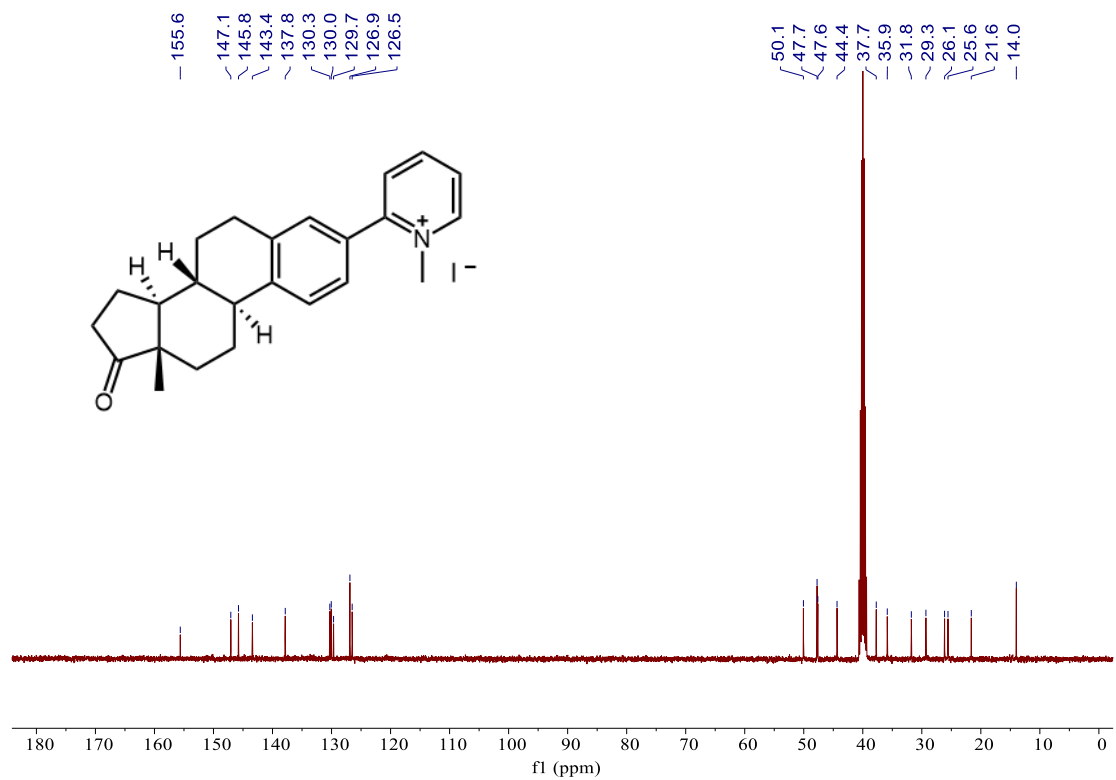

$^1\text{H}$  NMR (400 MHz,  $\text{DMSO-}d_6$ ) of compound **1aa**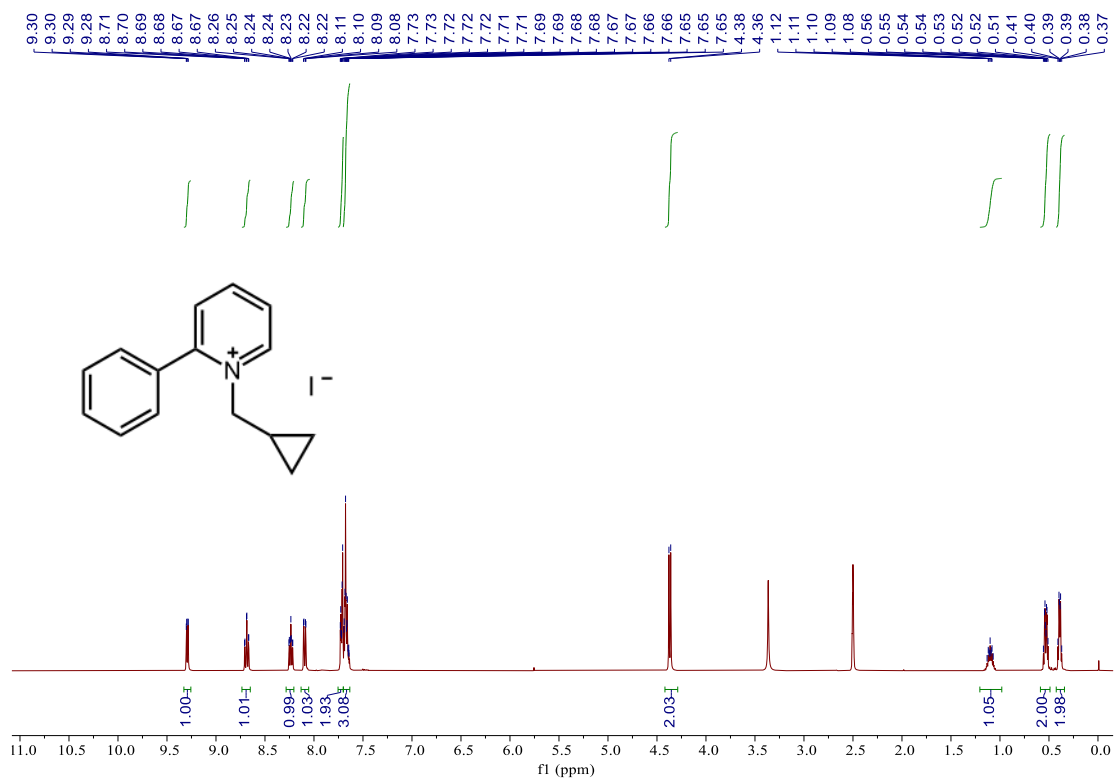 $^{13}\text{C}$  NMR (101 MHz,  $\text{DMSO-}d_6$ ) of compound **1aa**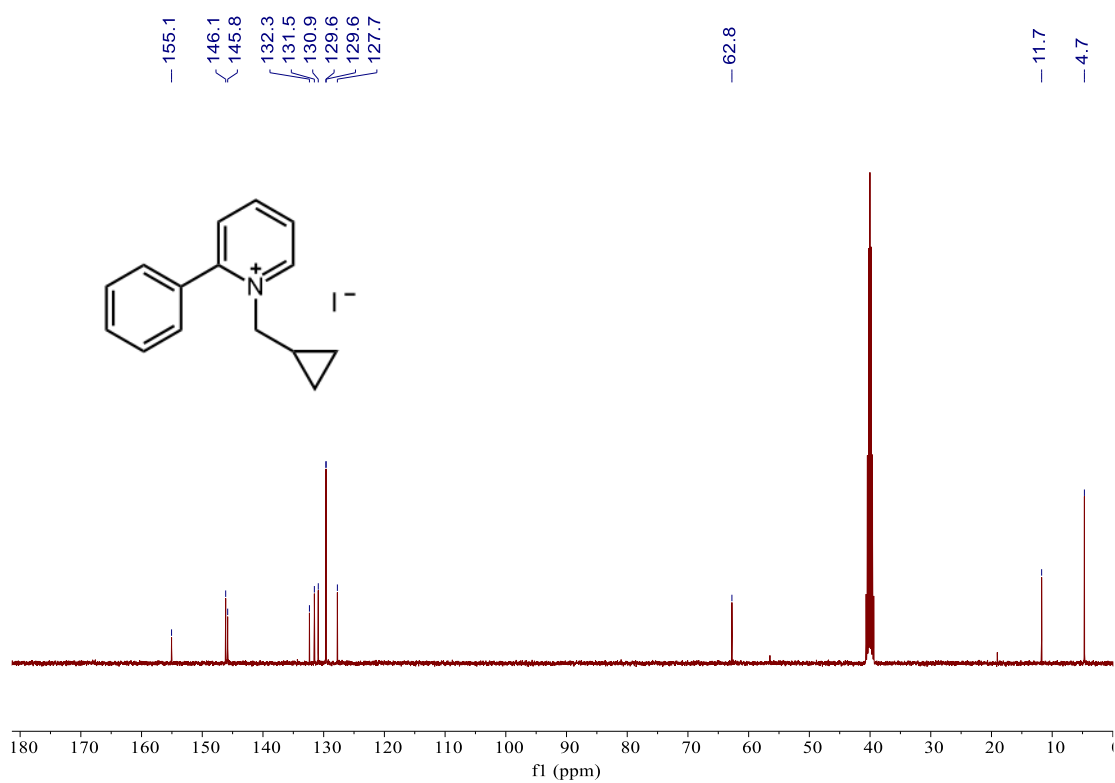

$^1\text{H}$  NMR (400 MHz,  $\text{DMSO-}d_6$ ) of compound **1ab**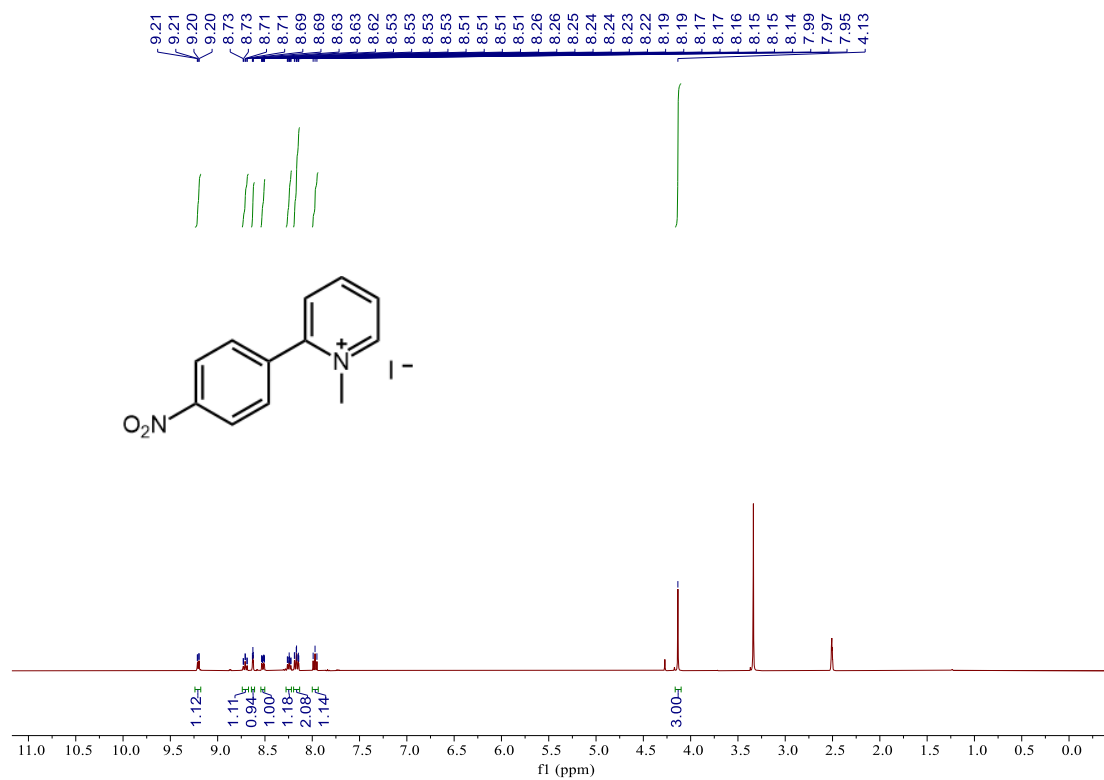 $^1\text{H}$  NMR (400 MHz,  $\text{DMSO-}d_6$ ) of compound **1ac**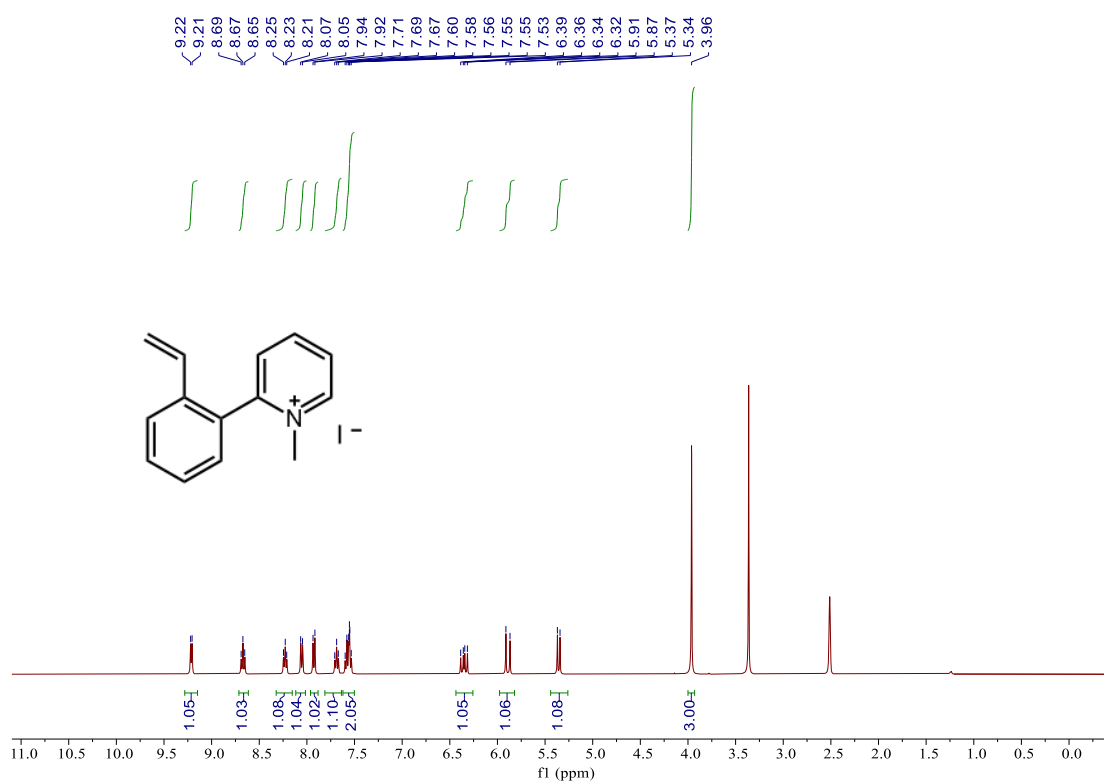

$^{13}\text{C}$  NMR (101 MHz,  $\text{DMSO-}d_6$ ) of compound **1ac**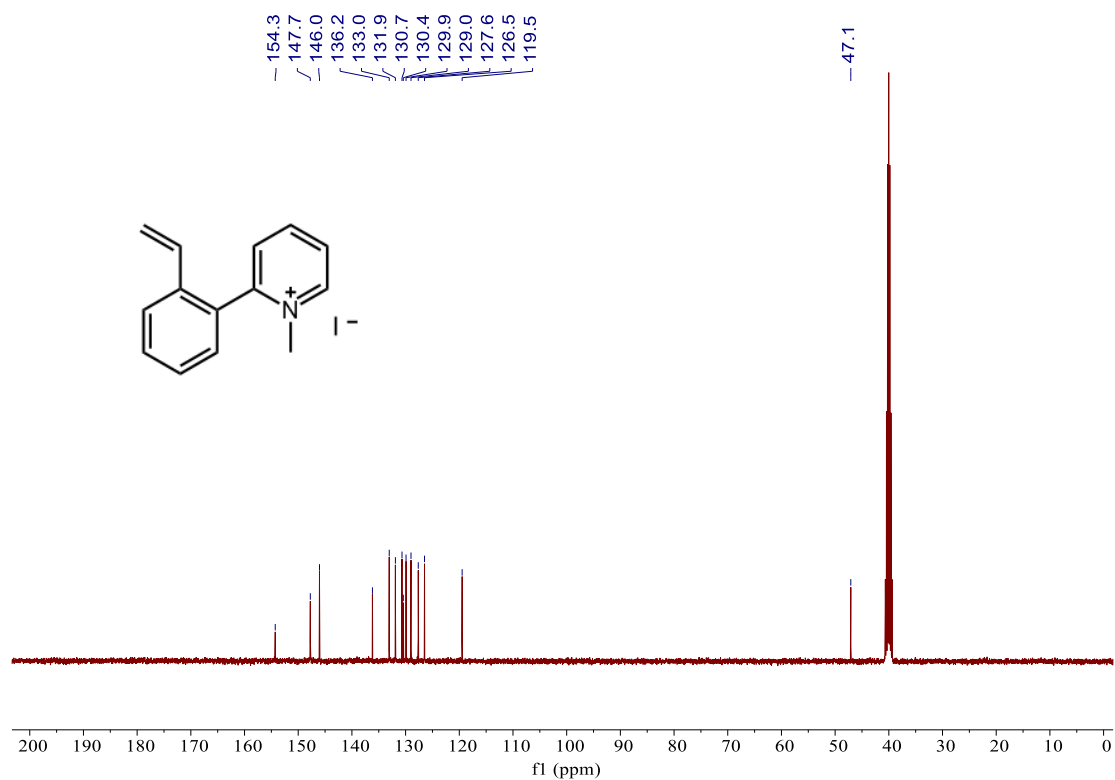 $^1\text{H}$  NMR (400 MHz,  $\text{DMSO-}d_6$ ) of compound **1ad**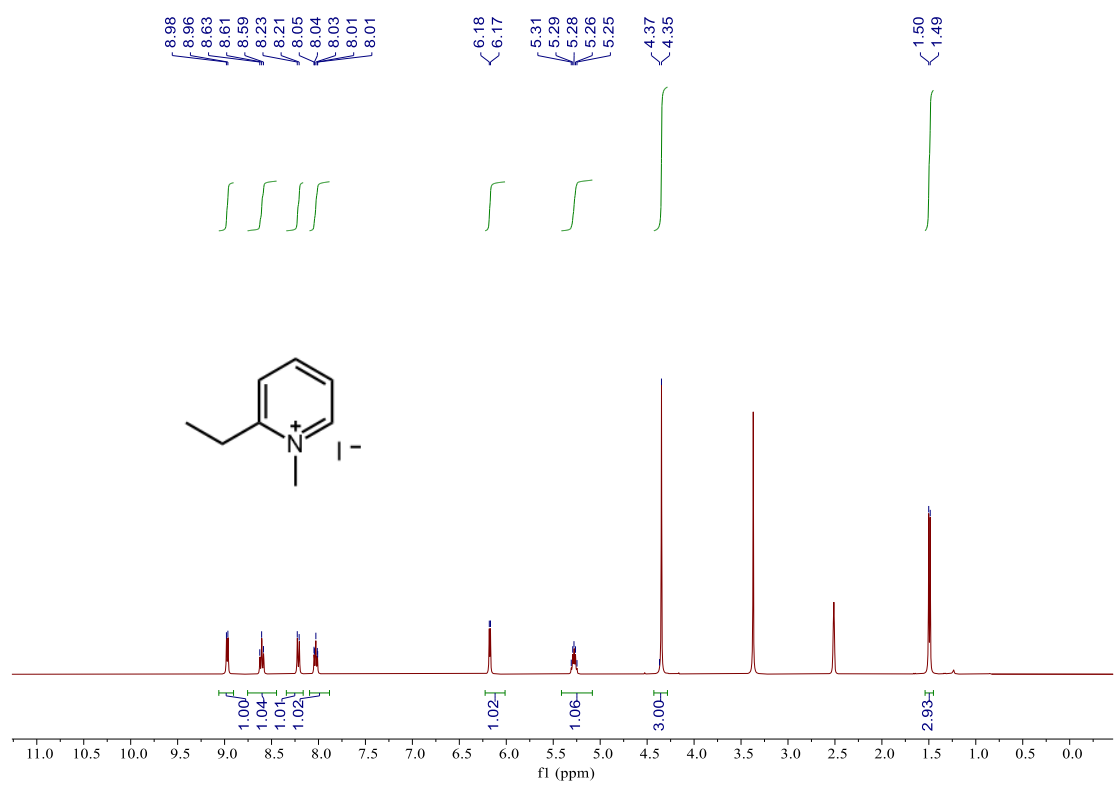

$^{13}\text{C}$  NMR (101 MHz,  $\text{DMSO-}d_6$ ) of compound **1ad**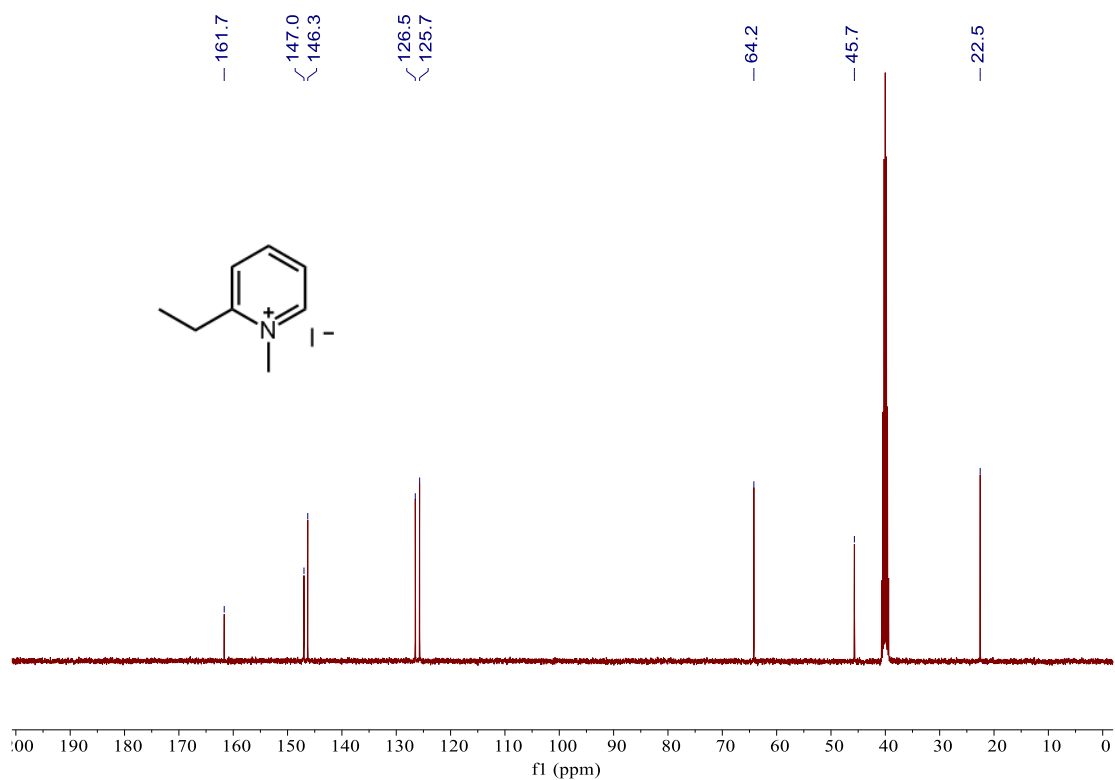 $^1\text{H}$  NMR (400 MHz,  $\text{DMSO-}d_6$ ) of compound **1ae**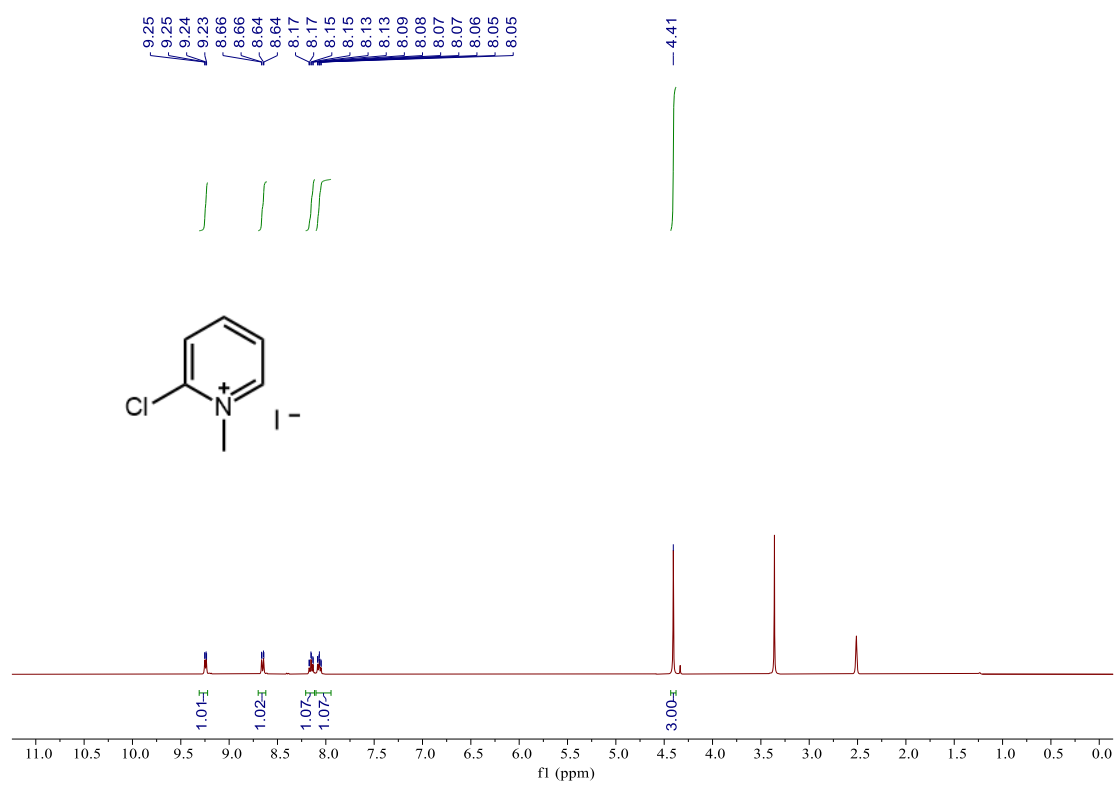

$^{13}\text{C}$  NMR (101 MHz,  $\text{DMSO-}d_6$ ) of compound **1ae**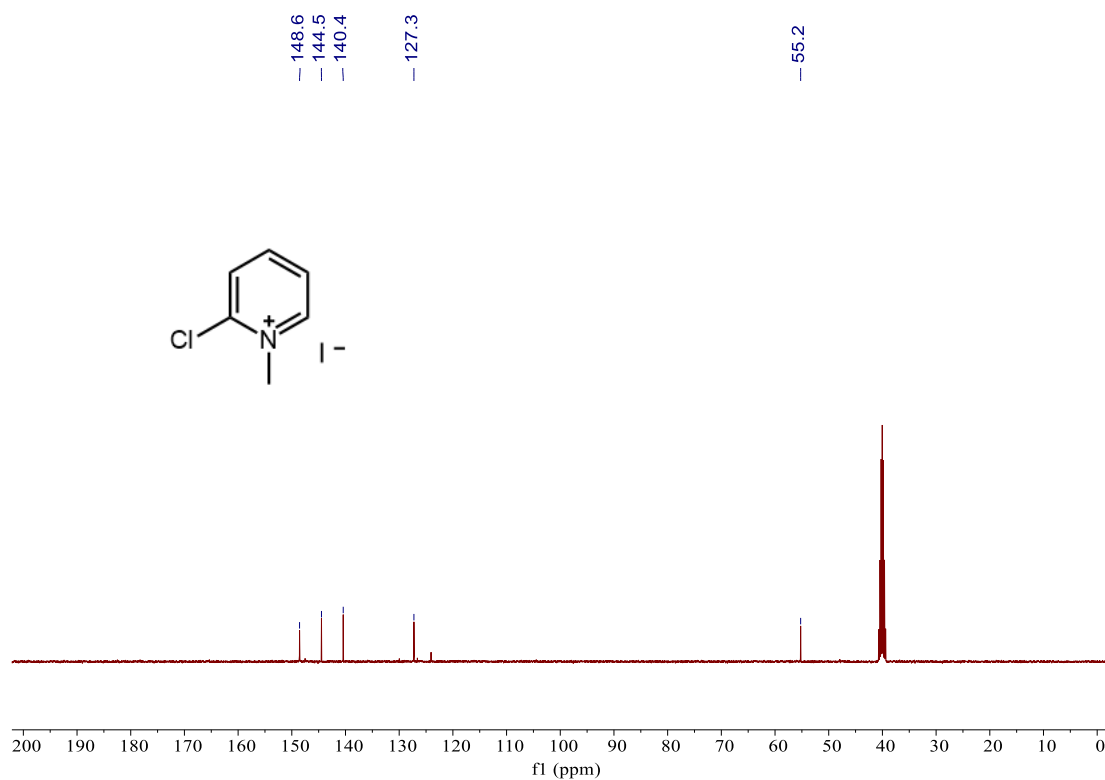 $^1\text{H}$  NMR (400 MHz,  $\text{DMSO-}d_6$ ) of compound **1af**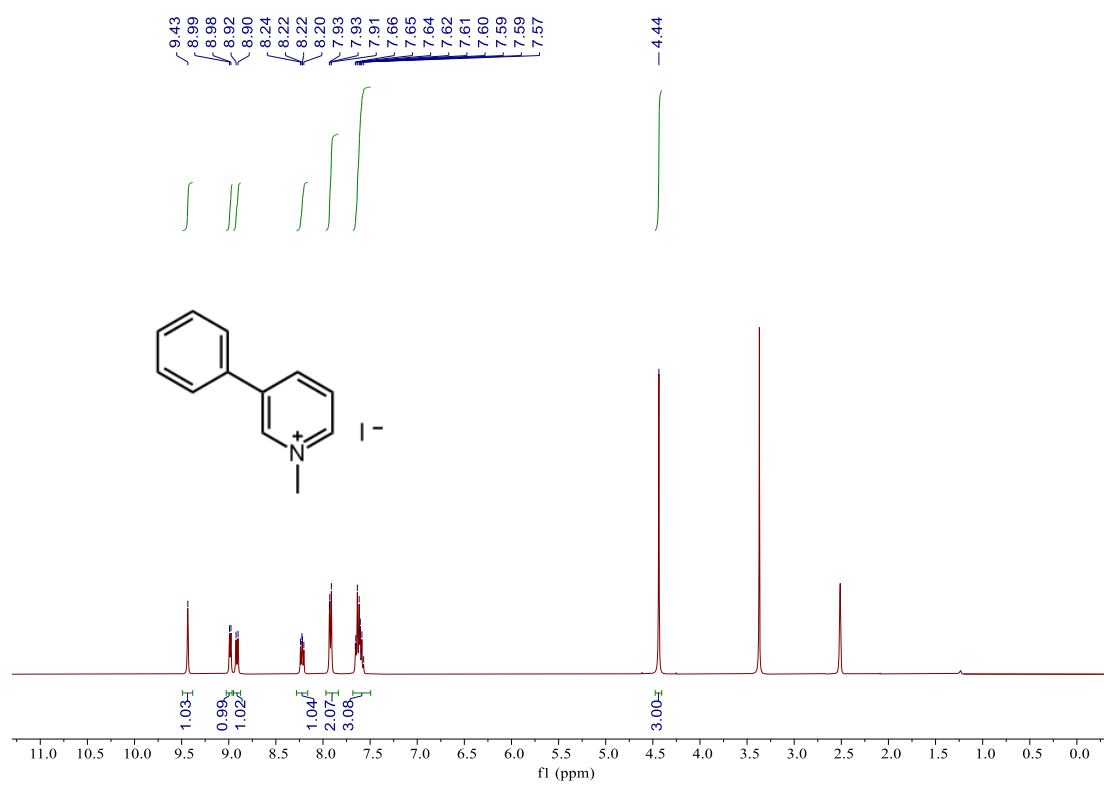

$^1\text{H}$  NMR (400 MHz,  $\text{DMSO-}d_6$ ) of compound **1ag**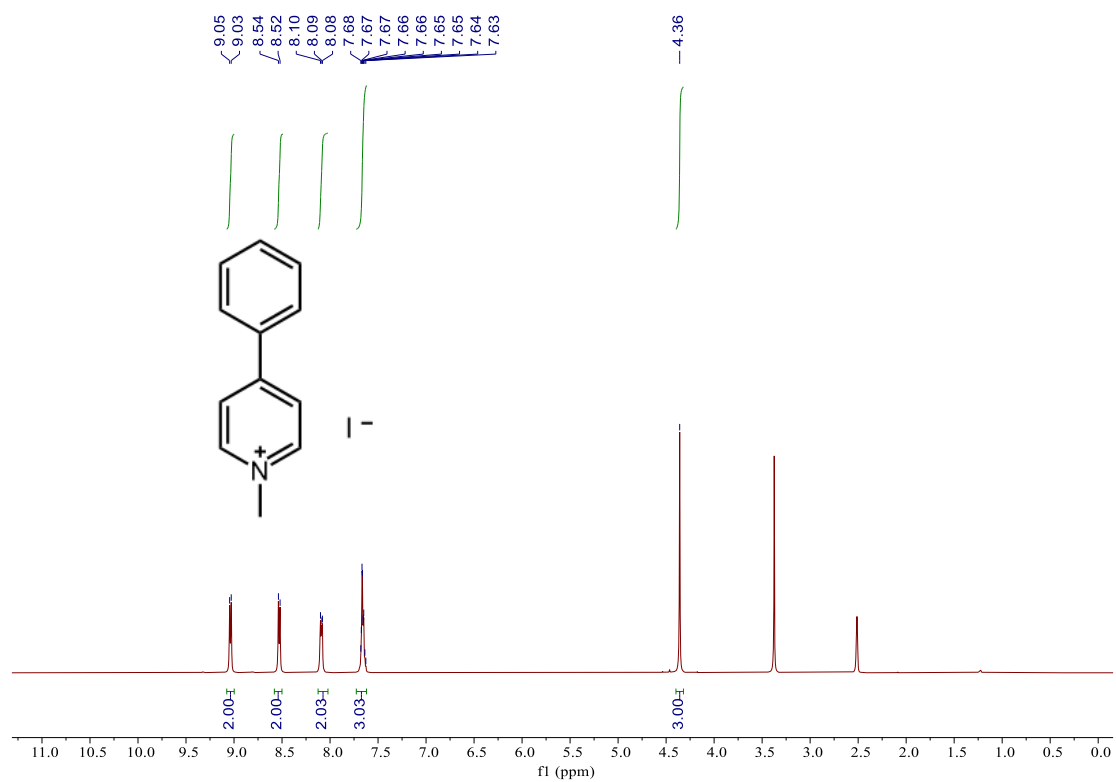 $^1\text{H}$  NMR (400 MHz,  $\text{DMSO-}d_6$ ) of compound **1ah**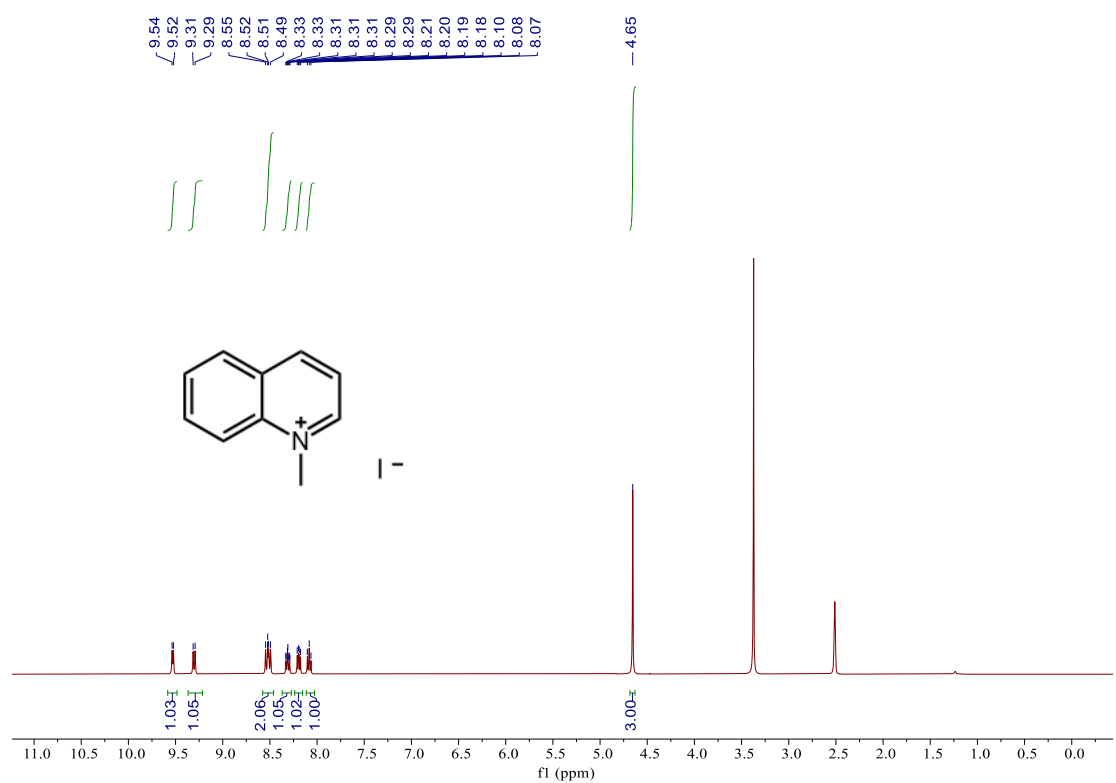

$^1\text{H}$  NMR (400 MHz,  $\text{DMSO-}d_6$ ) of compound **1ai**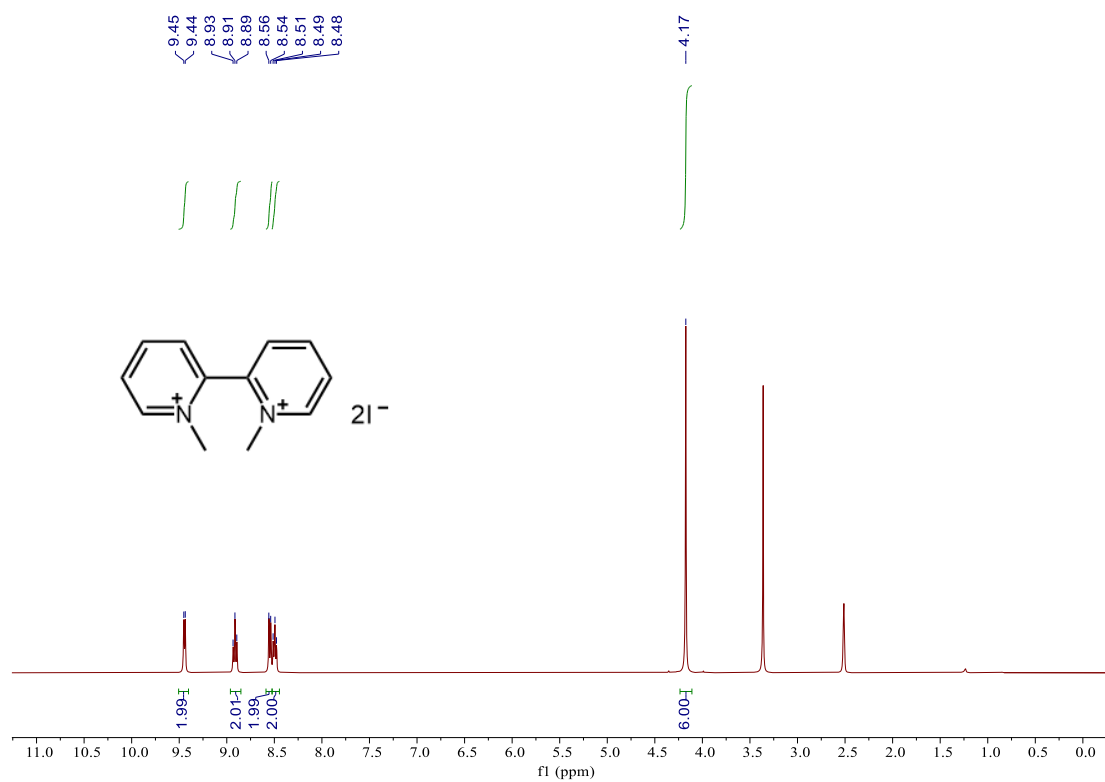 $^{13}\text{C}$  NMR (101 MHz,  $\text{DMSO-}d_6$ ) of compound **1ai**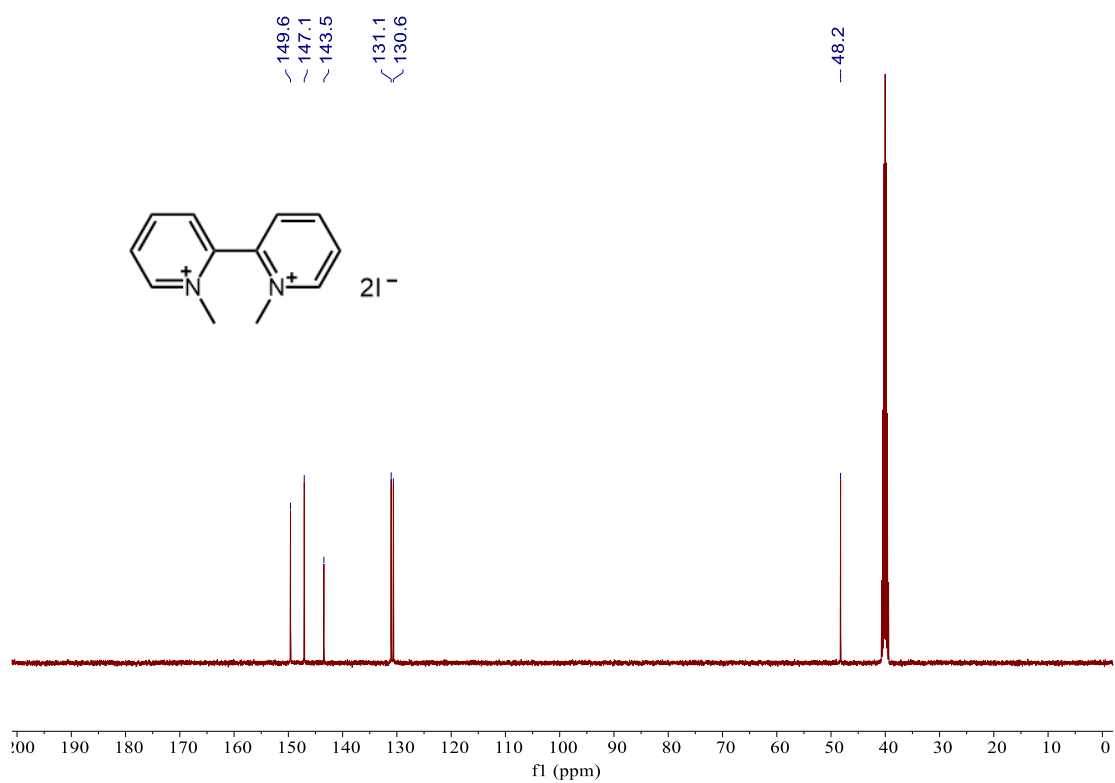

$^1\text{H}$  NMR (400 MHz,  $\text{DMSO-}d_6$ ) of compound **1aj**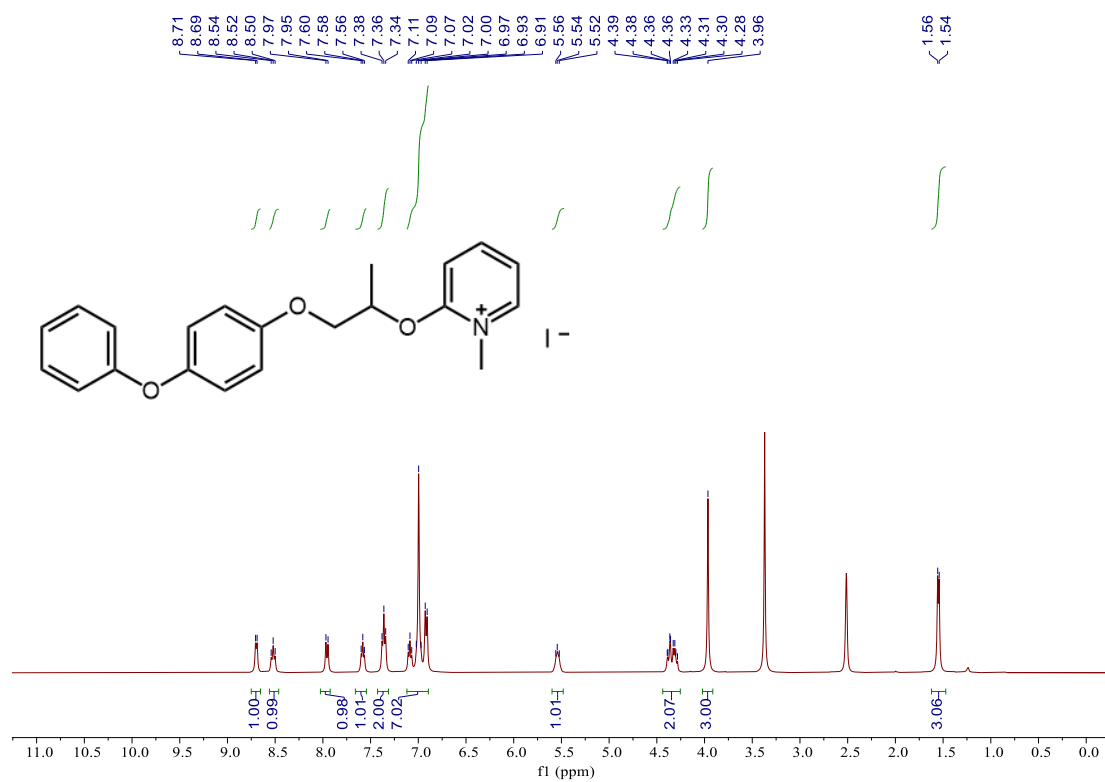 $^{13}\text{C}$  NMR (101 MHz,  $\text{DMSO-}d_6$ ) of compound **1aj**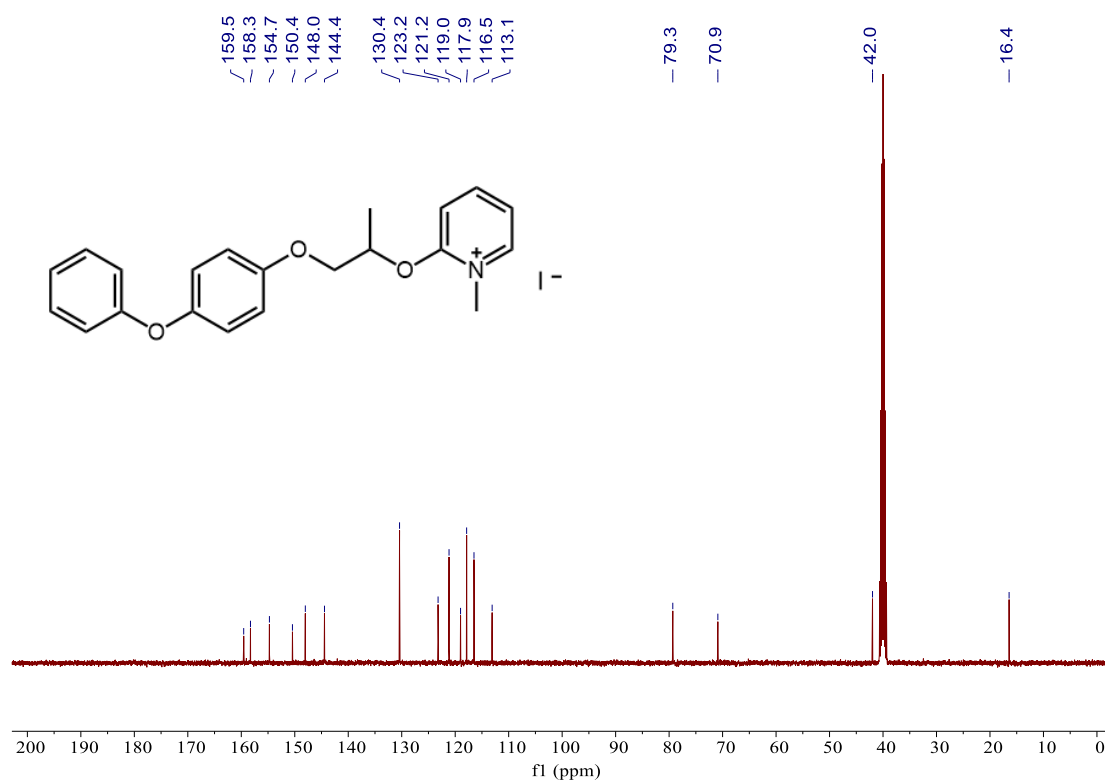

$^1\text{H}$  NMR (400 MHz,  $\text{DMSO-}d_6$ ) of compound **1ak**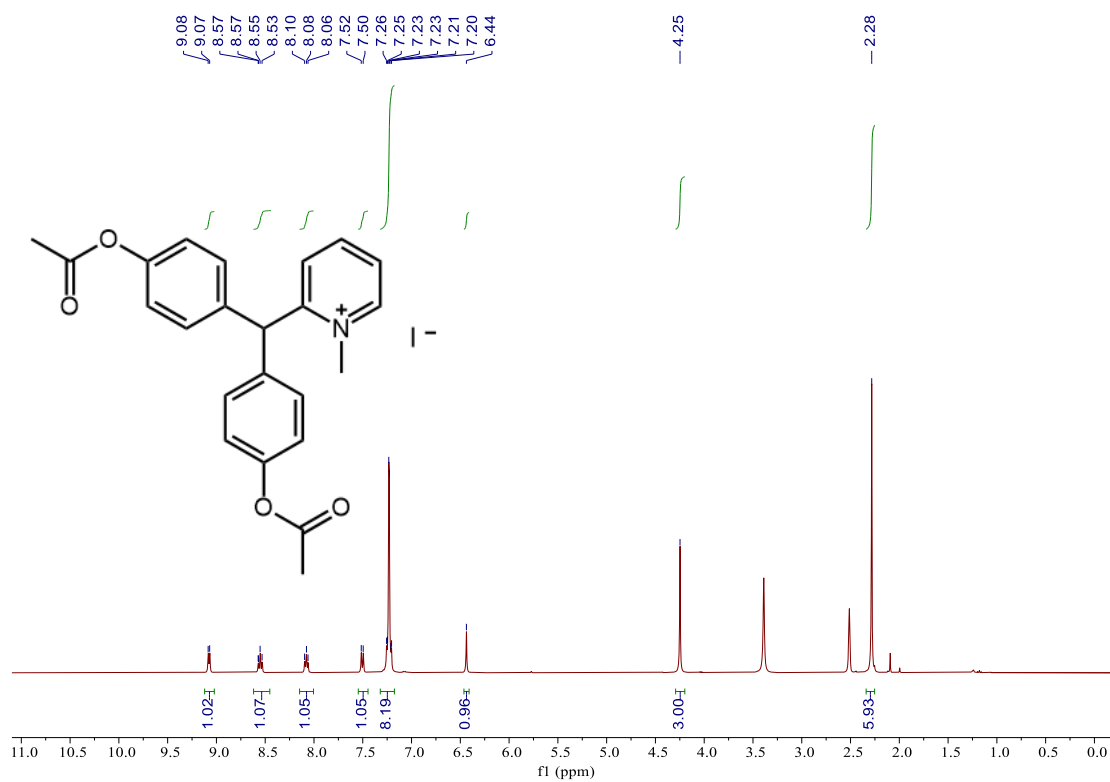 $^{13}\text{C}$  NMR (101 MHz,  $\text{DMSO-}d_6$ ) of compound **1aj**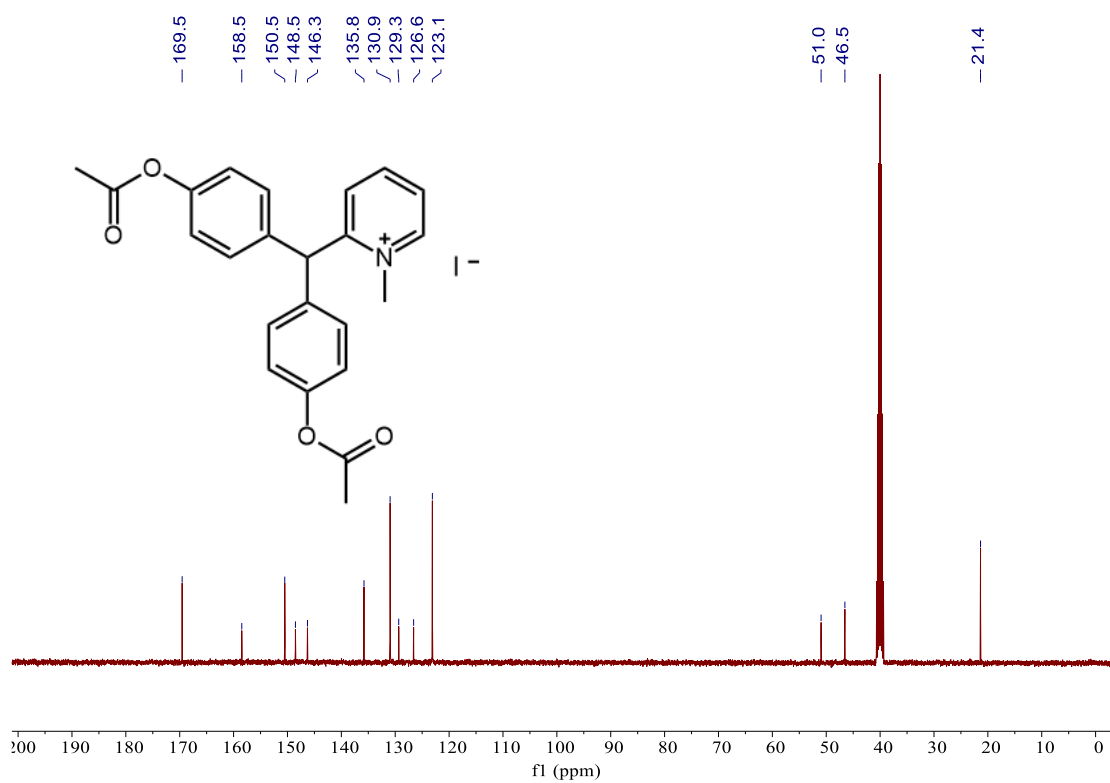

$^1\text{H}$  NMR (400 MHz,  $\text{DMSO-}d_6$ ) of compound **1aj**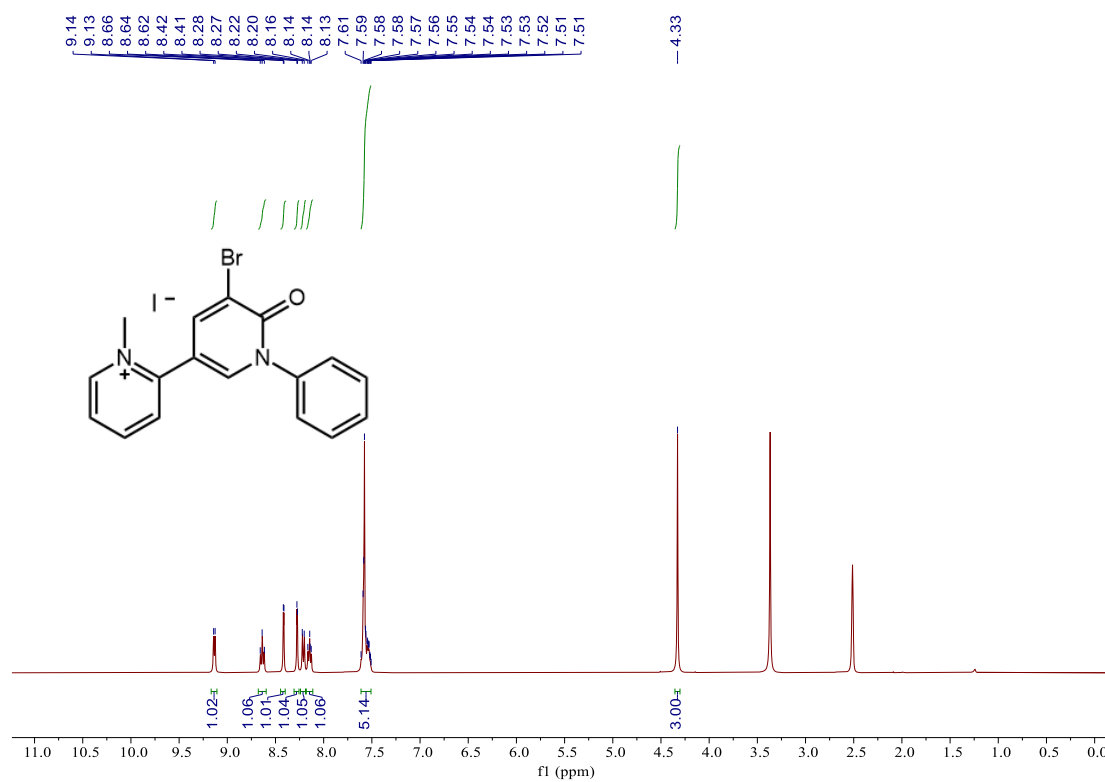 $^{13}\text{C}$  NMR (101 MHz,  $\text{DMSO-}d_6$ ) of compound **1aj**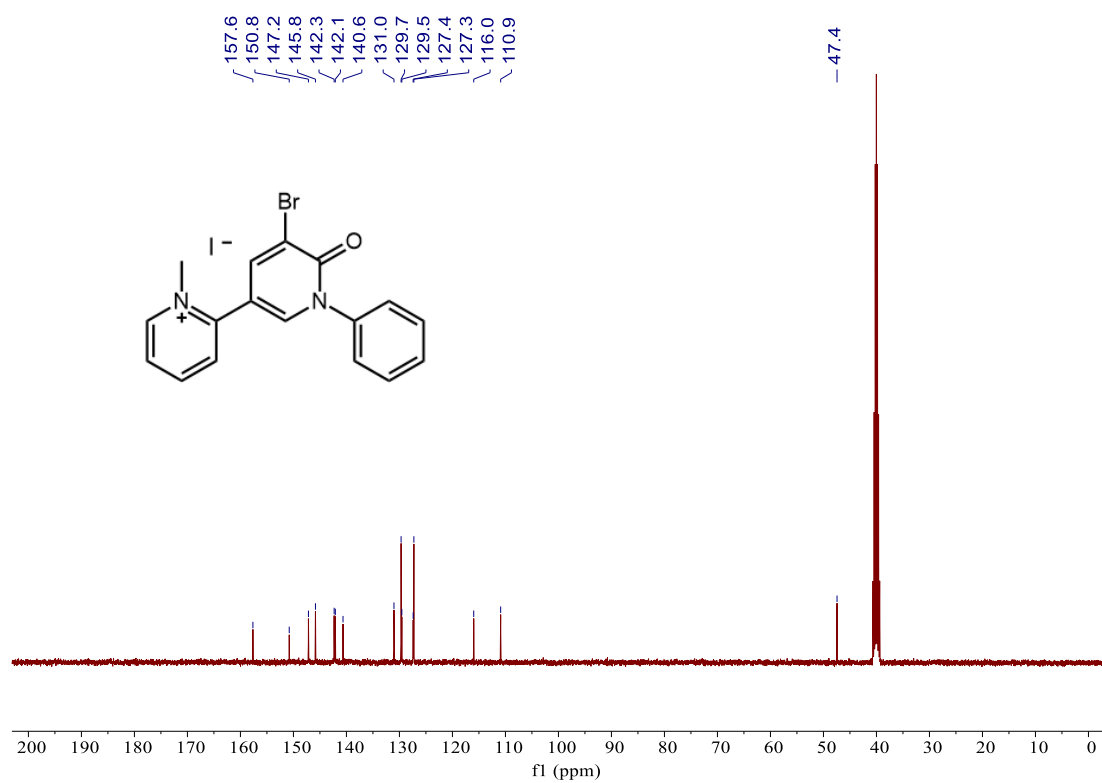

$^1\text{H}$  NMR (400 MHz,  $\text{DMSO-}d_6$ ) of compound **1am**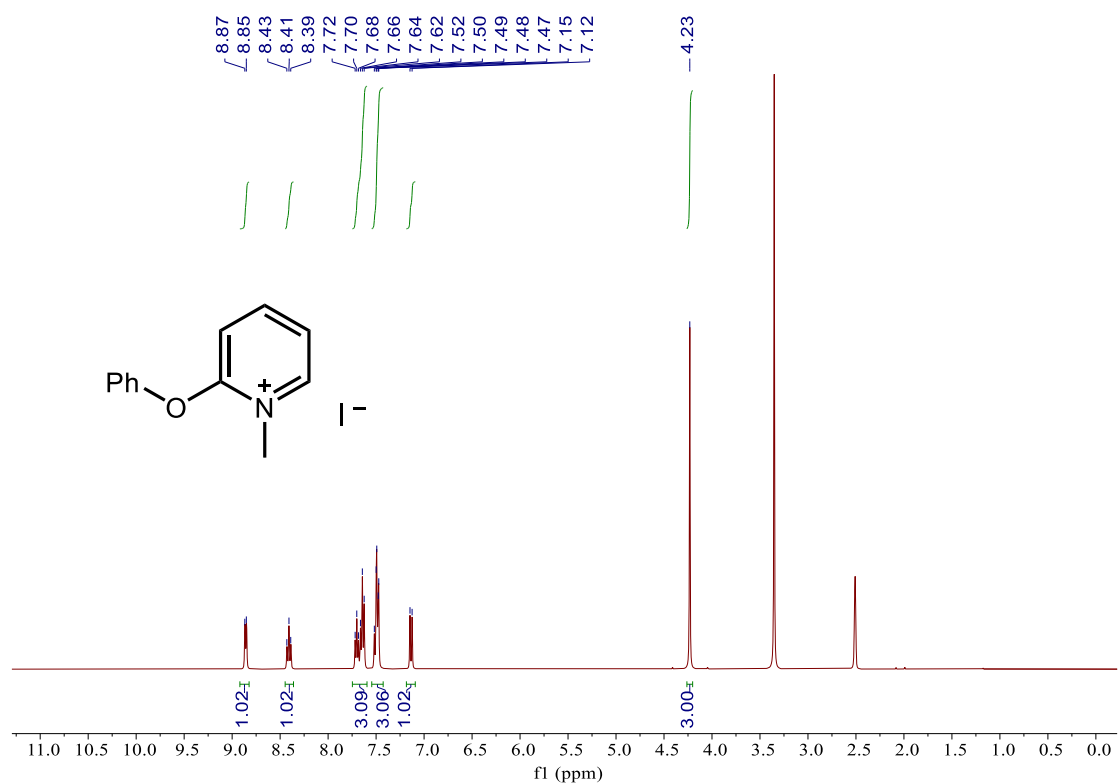 $^1\text{H}$  NMR (400 MHz,  $\text{DMSO-}d_6$ ) of compound **1ao**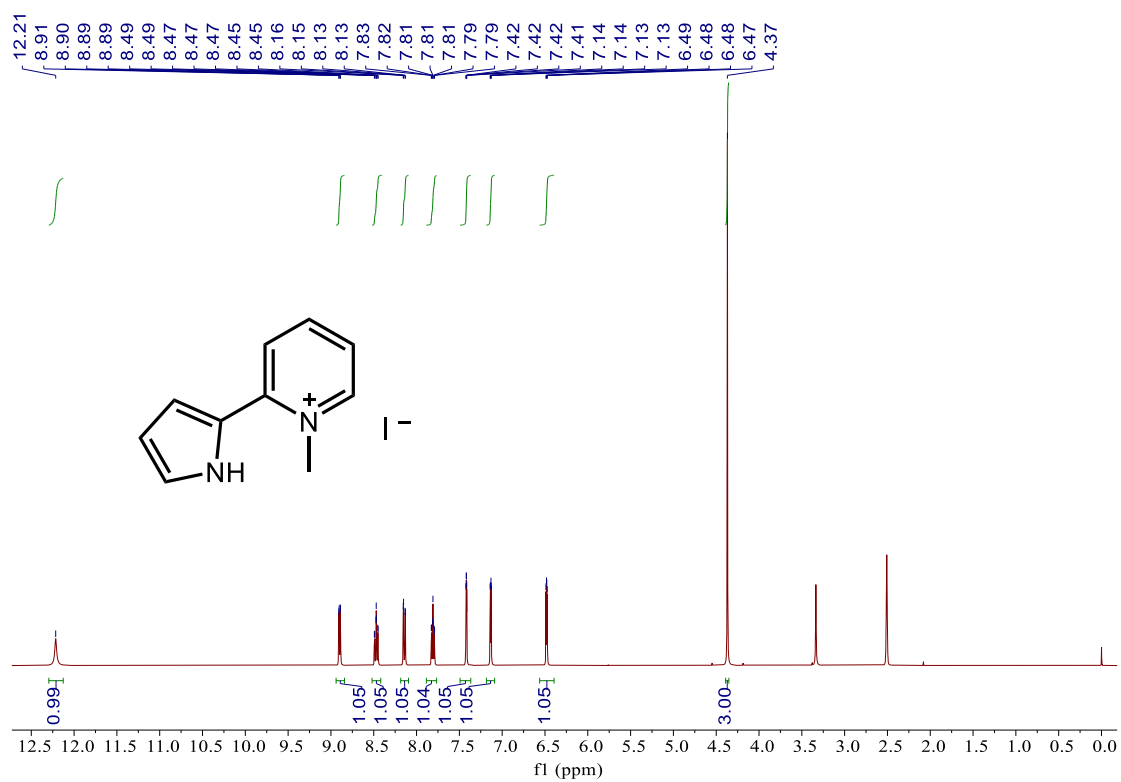

$^1\text{H}$  NMR (400 MHz,  $\text{DMSO-}d_6$ ) of compound **1ap**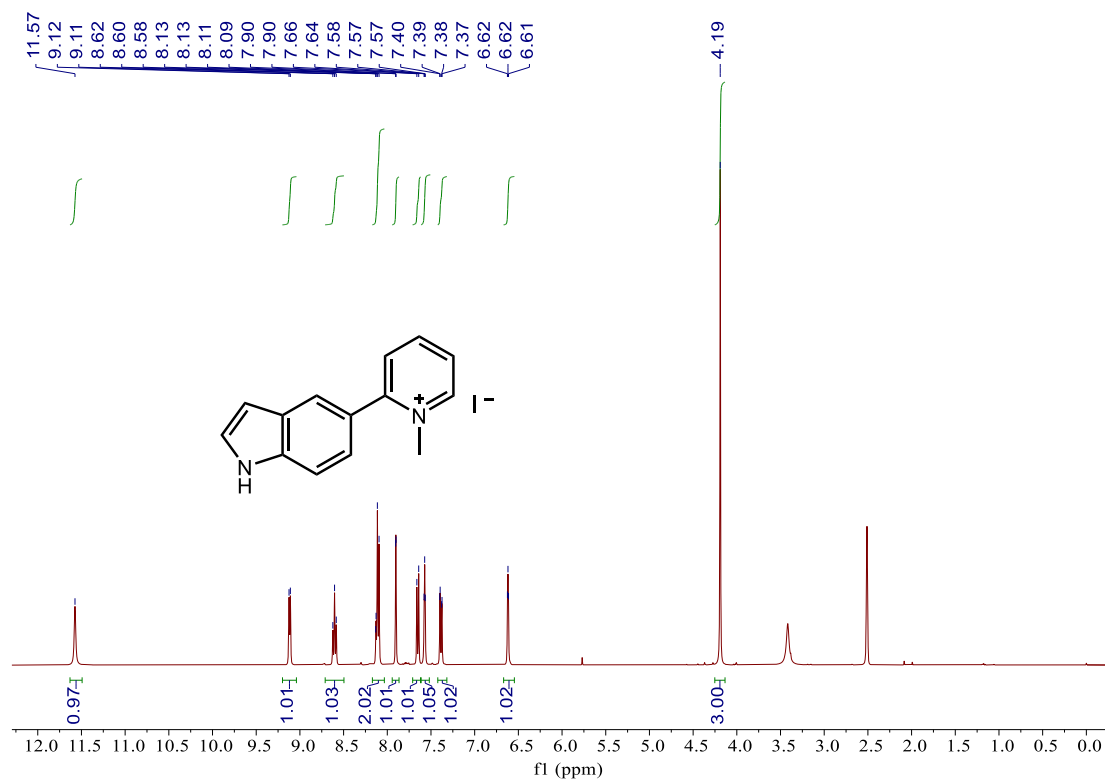 $^{13}\text{C}$  NMR (101 MHz,  $\text{DMSO-}d_6$ ) of compound **1ap**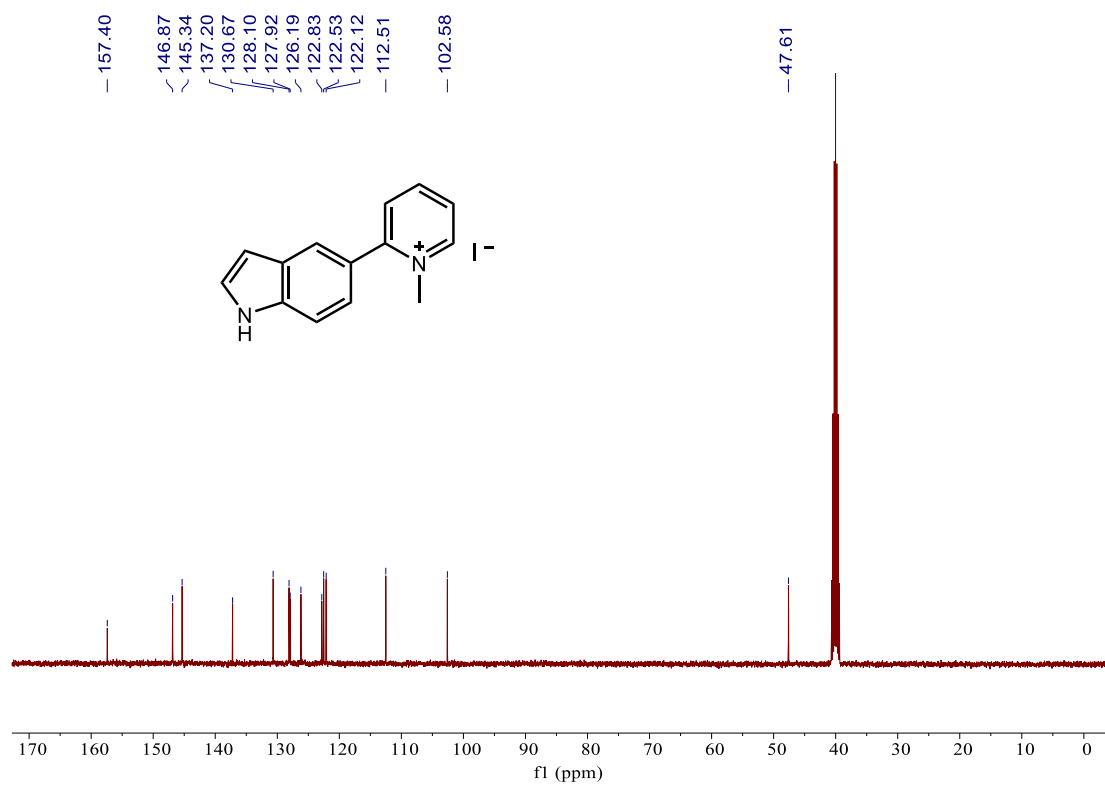

$^1\text{H}$  NMR (400 MHz,  $\text{DMSO-}d_6$ ) of compound **1aq**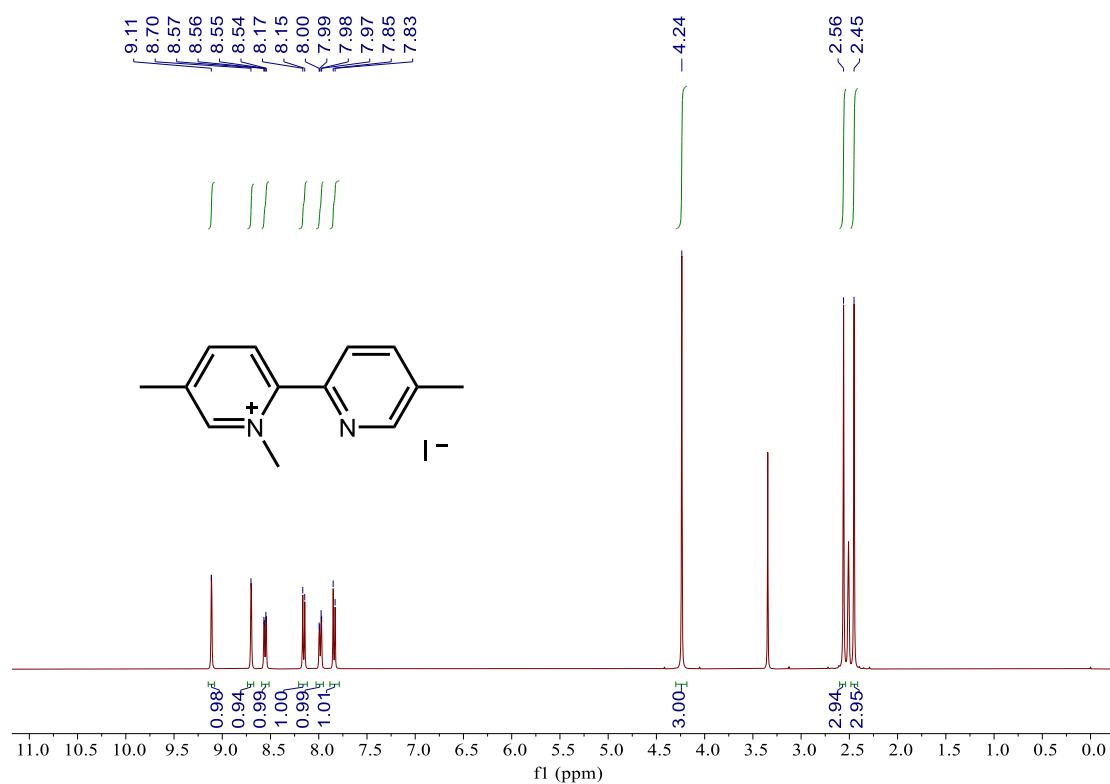 $^{13}\text{C}$  NMR (101 MHz,  $\text{DMSO-}d_6$ ) of compound **1aq**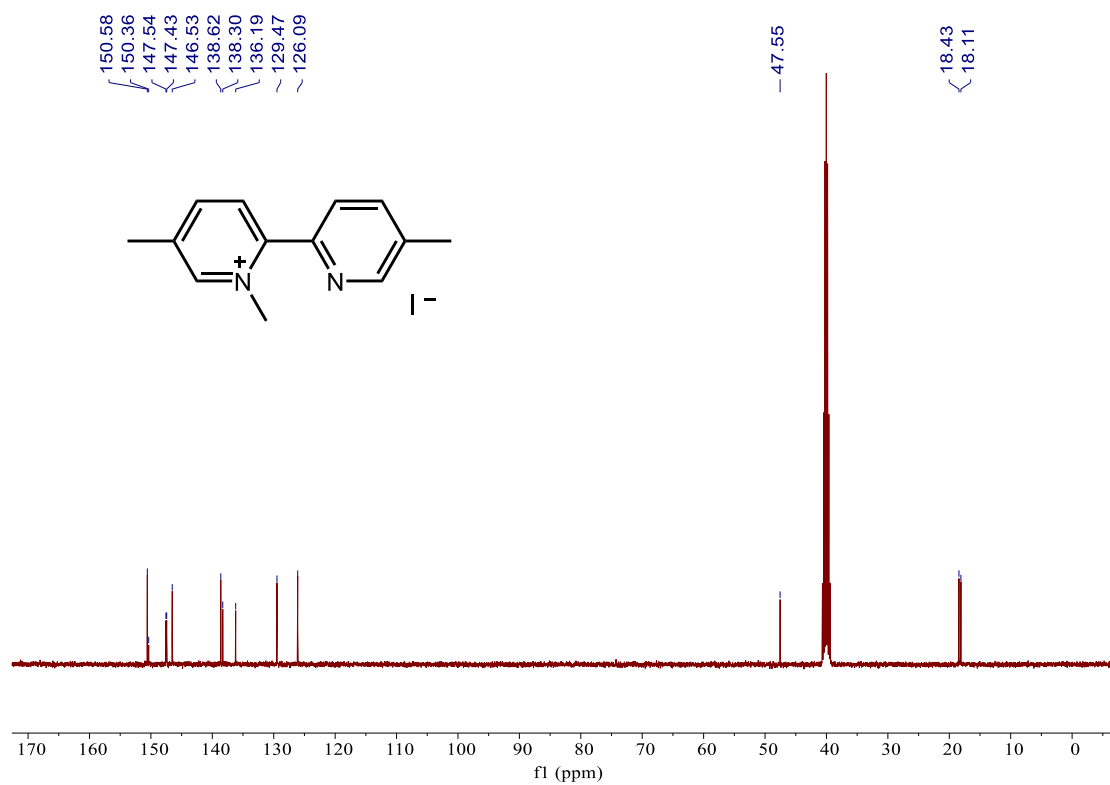

$^1\text{H}$  NMR (400 MHz,  $\text{DMSO-}d_6$ ) of compound **1ar**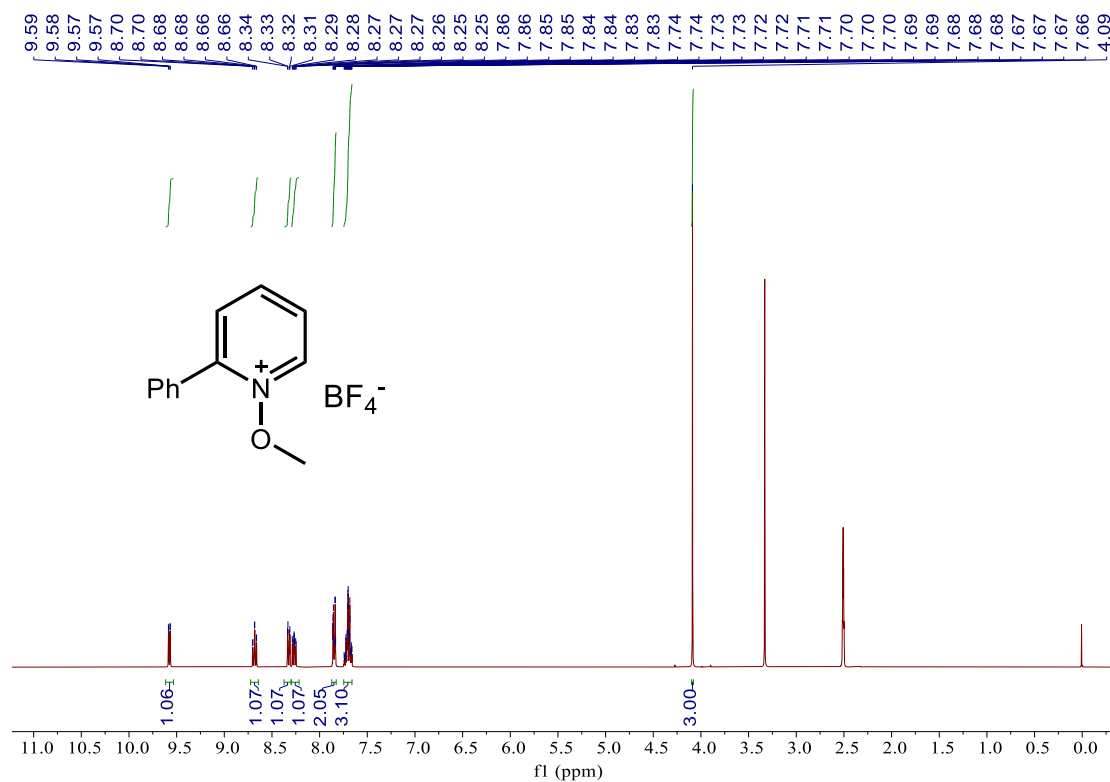 $^1\text{H}$  NMR (400 MHz,  $\text{DMSO-}d_6$ ) of compound **1a-D4**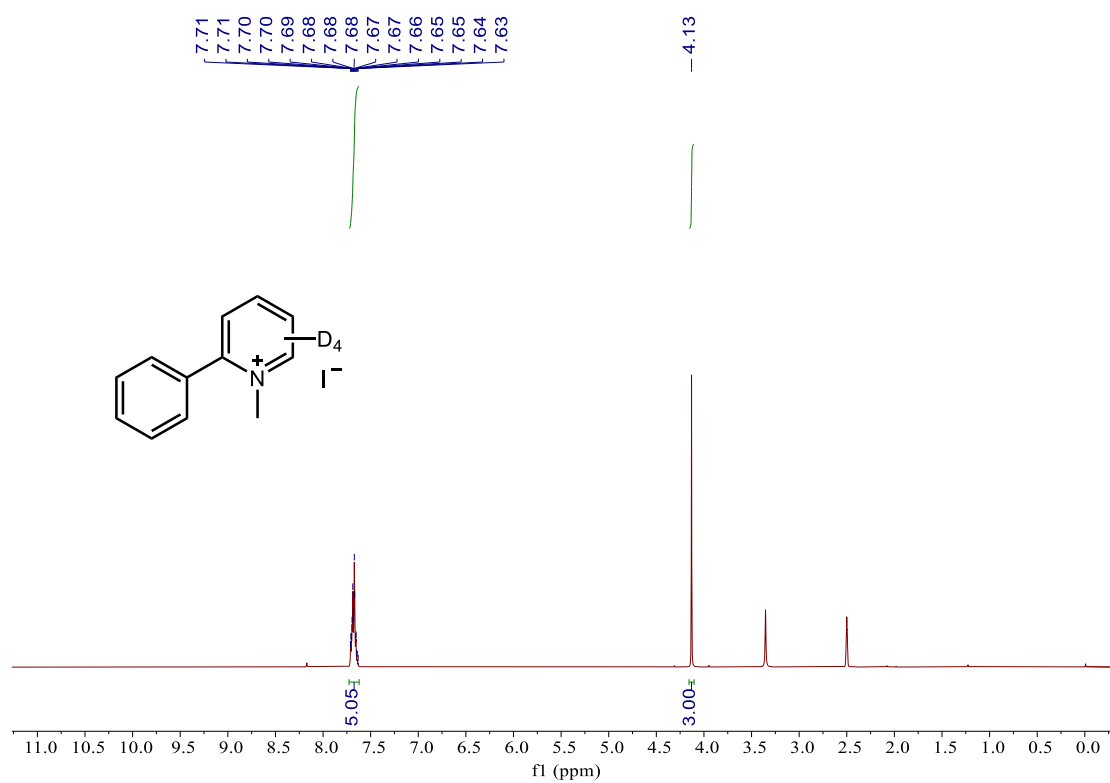

$^1\text{H}$  NMR (400 MHz, Chloroform-*d*) of compound **1**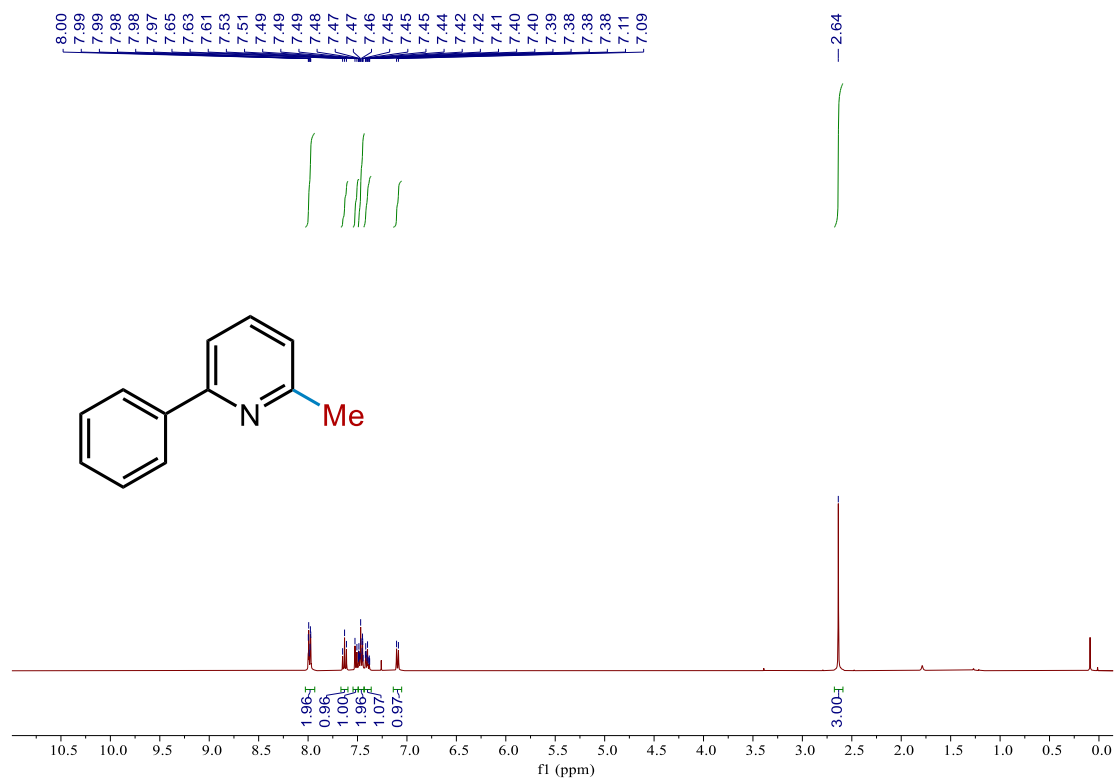 $^1\text{H}$  NMR (400 MHz, Chloroform-*d*) of compound **2**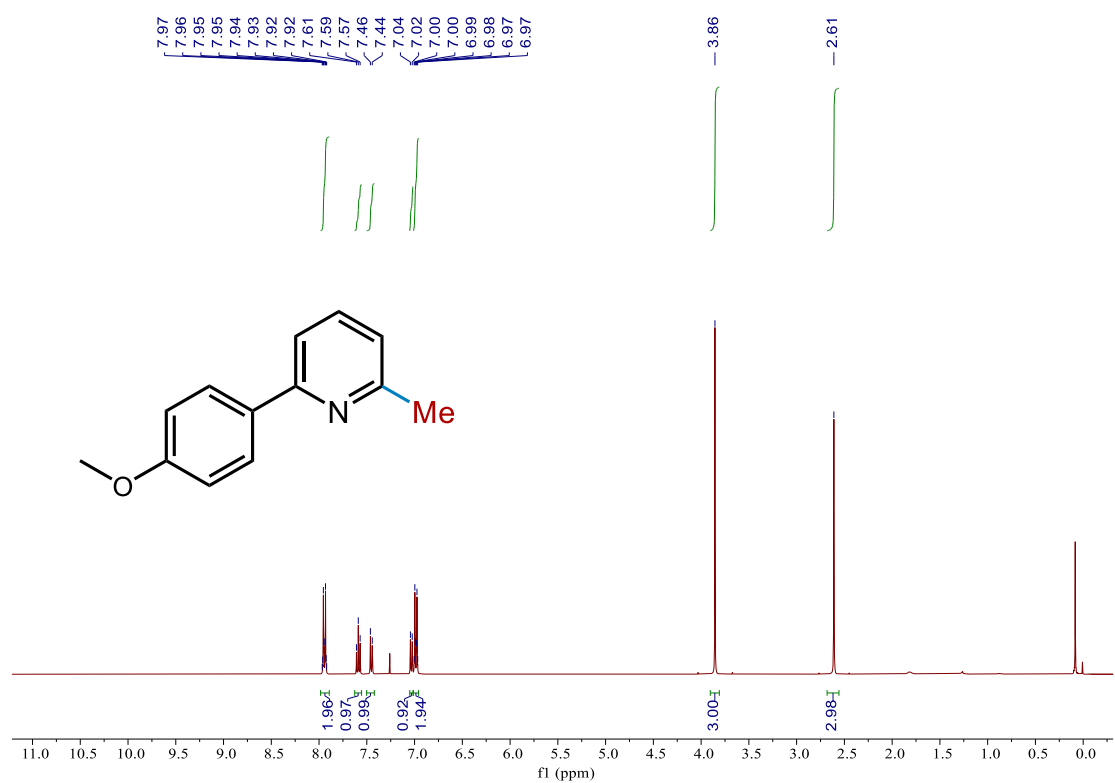

$^1\text{H}$  NMR (400 MHz, Chloroform-*d*) of compound 3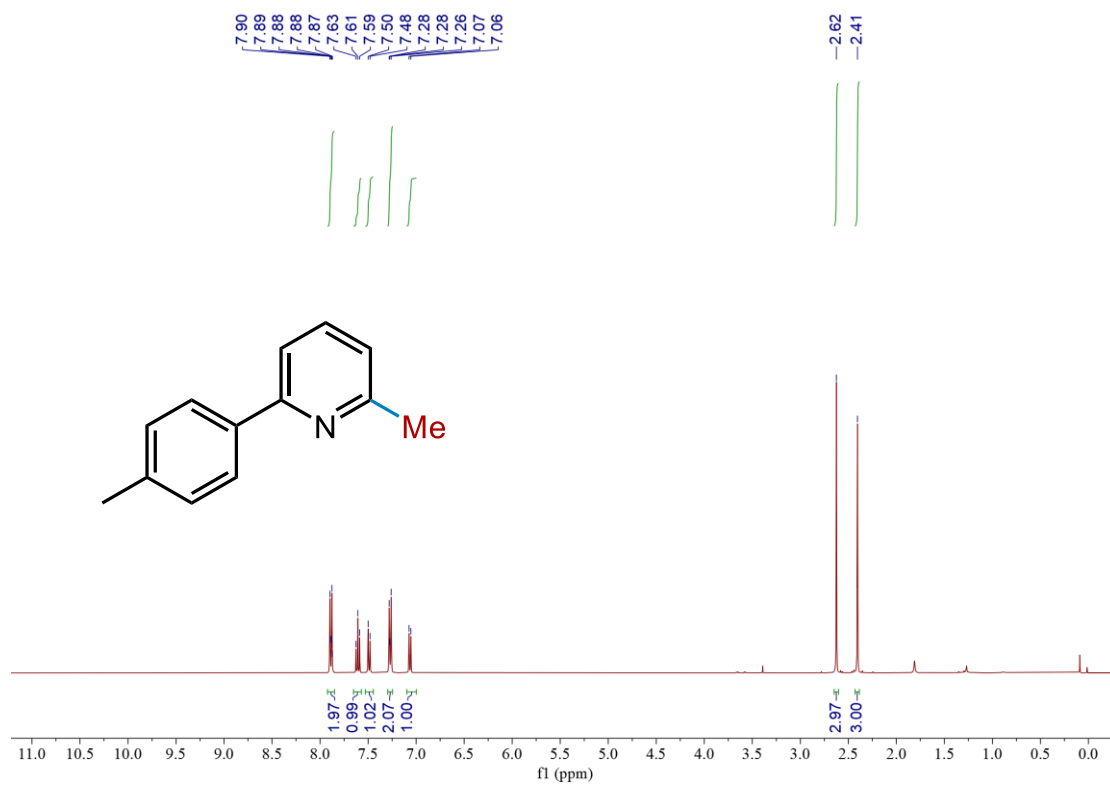 $^1\text{H}$  NMR (400 MHz, Chloroform-*d*) of compound 4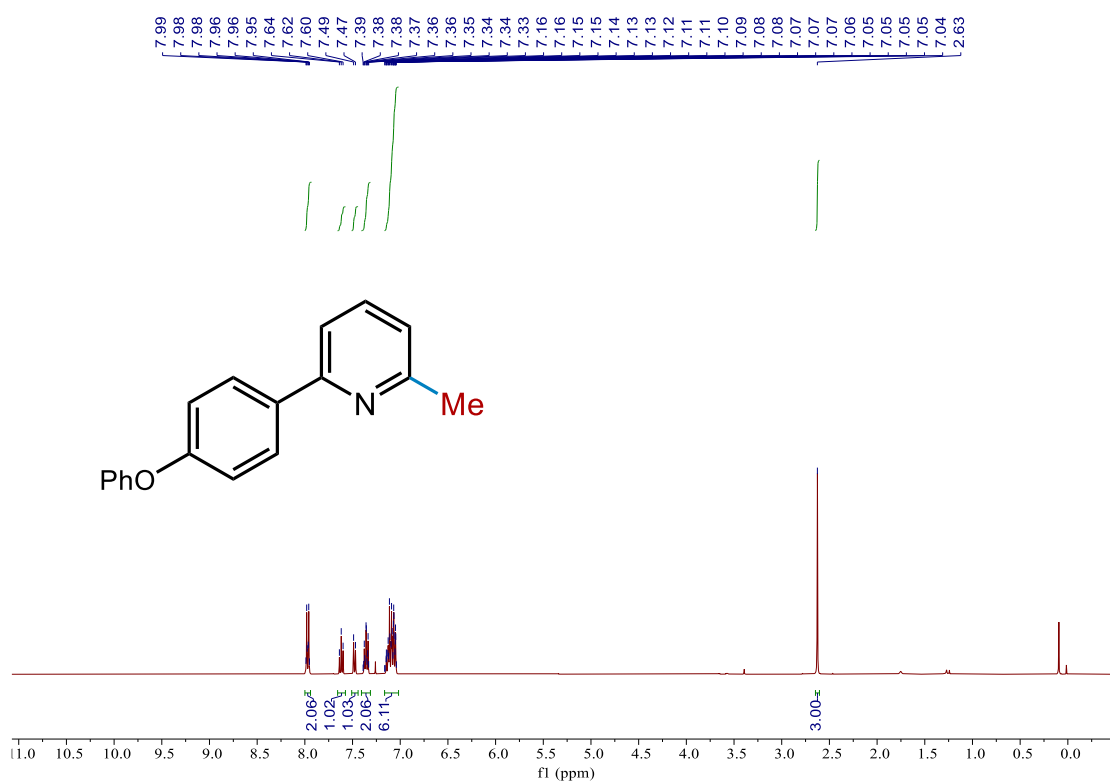

$^1\text{H}$  NMR (400 MHz, Chloroform-*d*) of compound **5**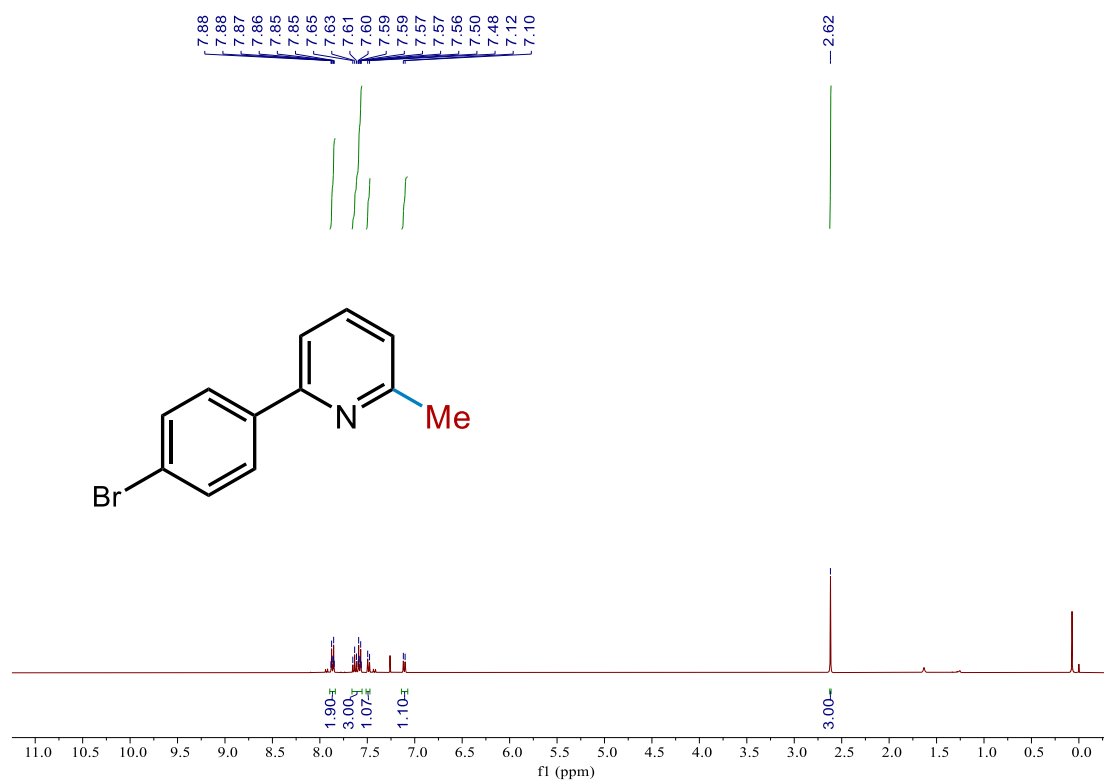 $^1\text{H}$  NMR (400 MHz, Chloroform-*d*) of compound **6**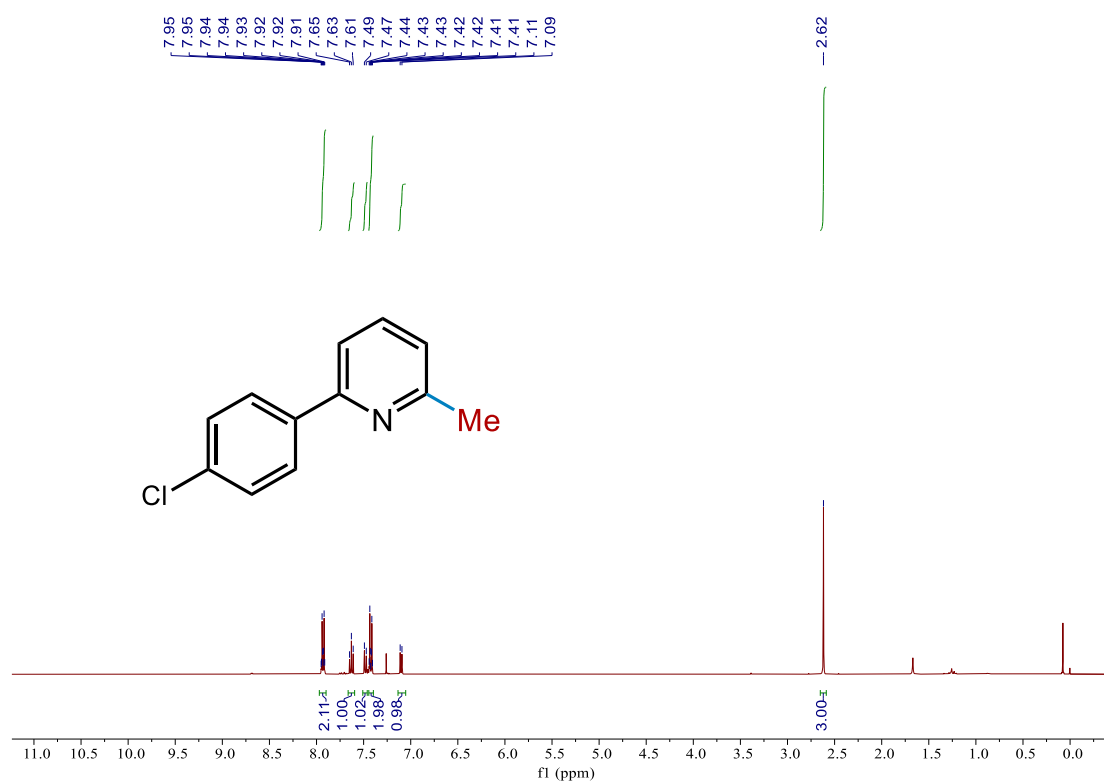

$^1\text{H}$  NMR (400 MHz, Chloroform-*d*) of compound **7**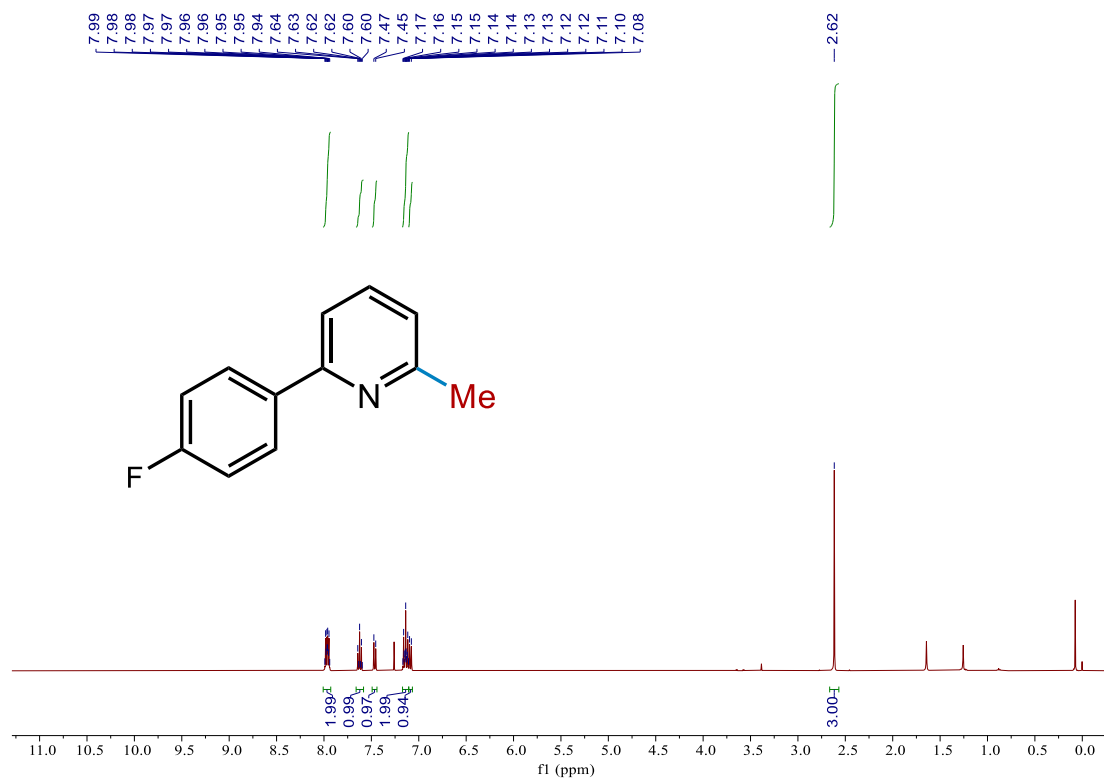 $^1\text{H}$  NMR (400 MHz, Chloroform-*d*) of compound **8**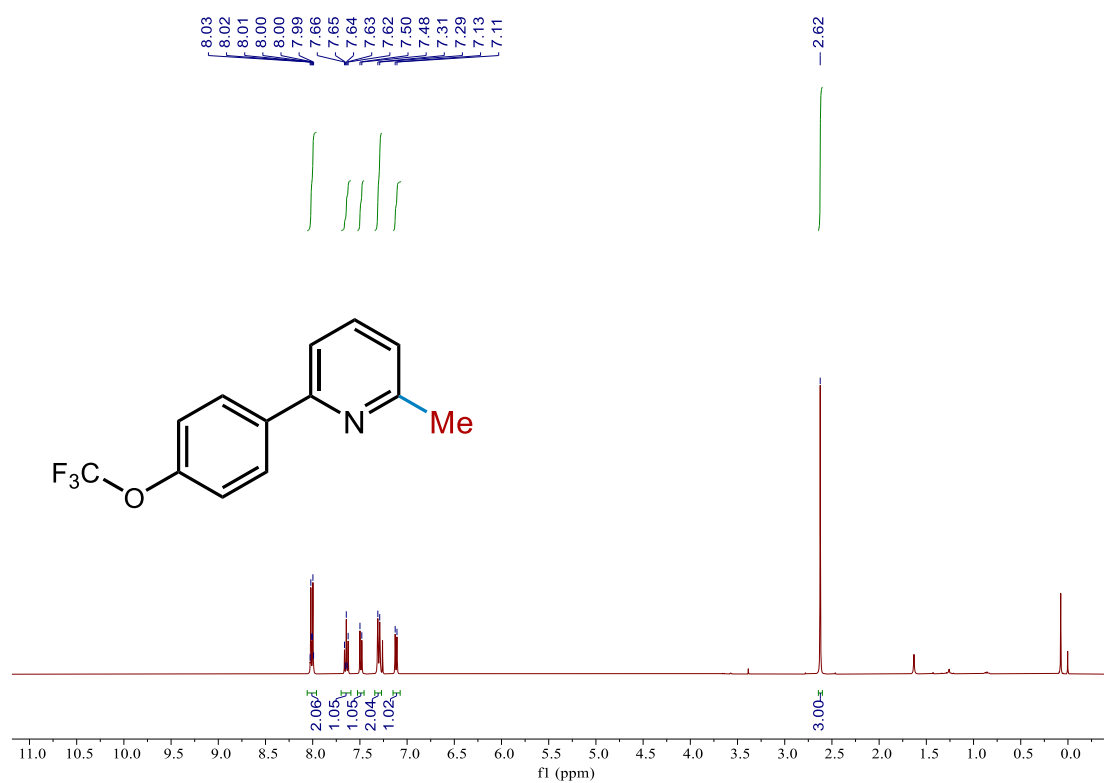

$^1\text{H}$  NMR (400 MHz, Chloroform-*d*) of compound **9**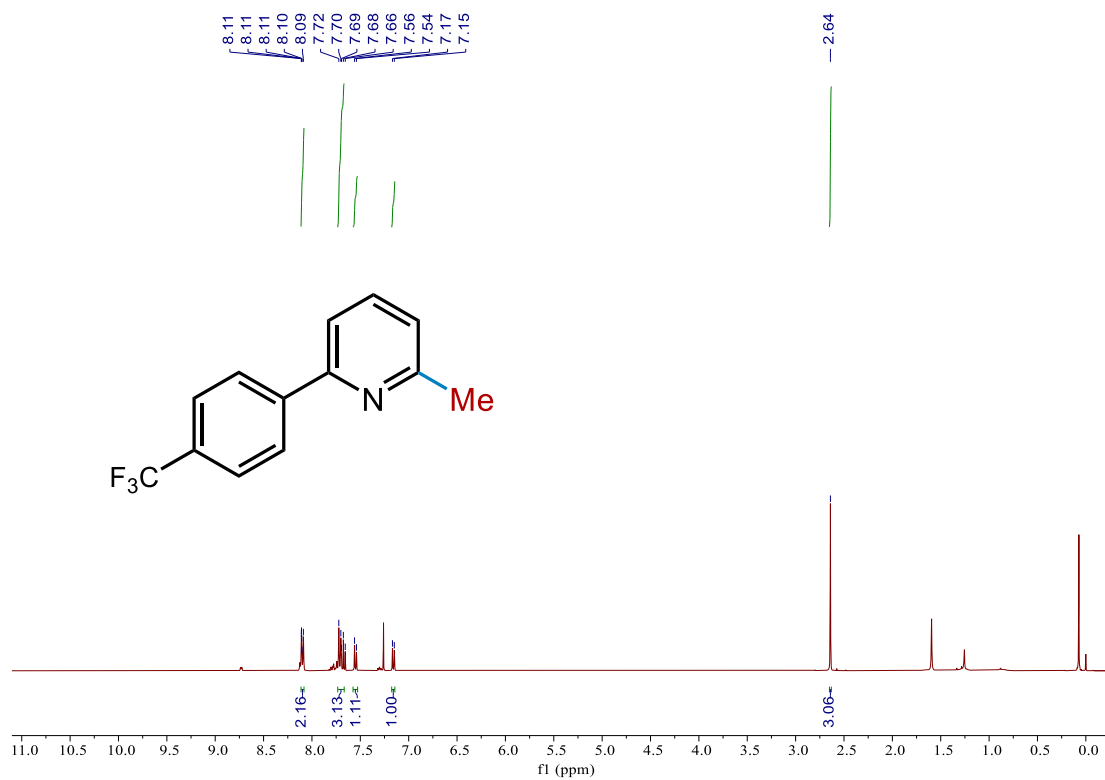 $^1\text{H}$  NMR (400 MHz, Chloroform-*d*) of compound **10**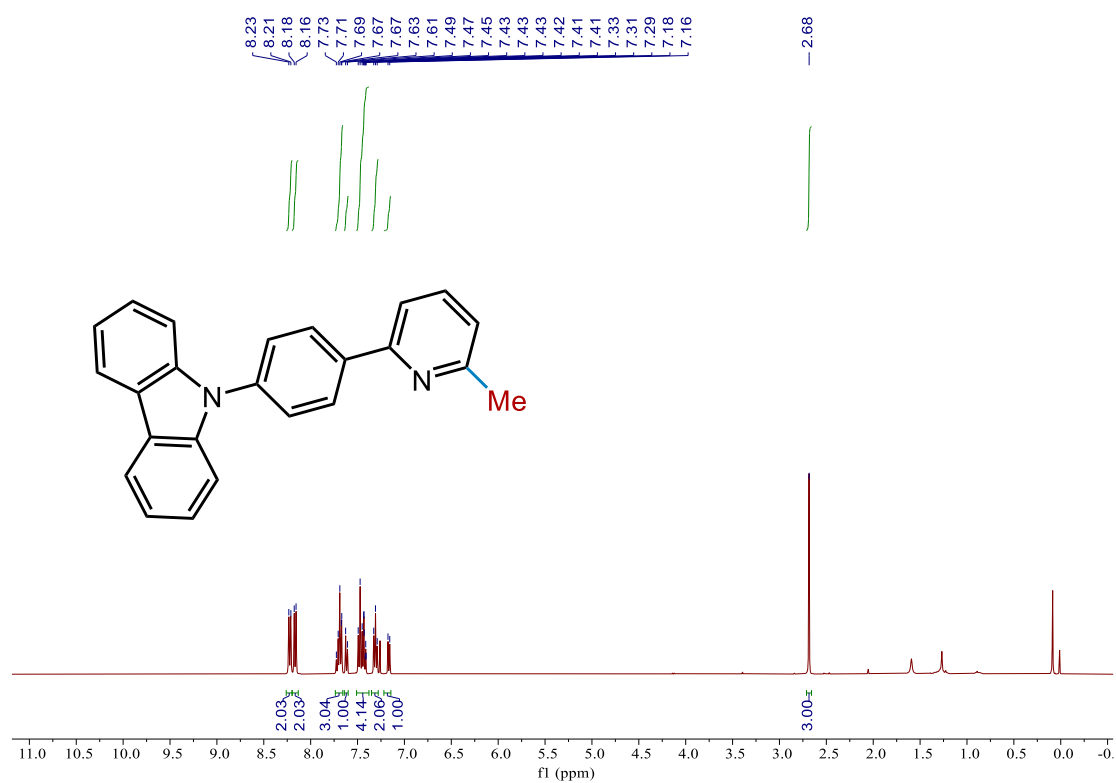

$^{13}\text{C}$  NMR (101 MHz, Chloroform-*d*) of compound **10**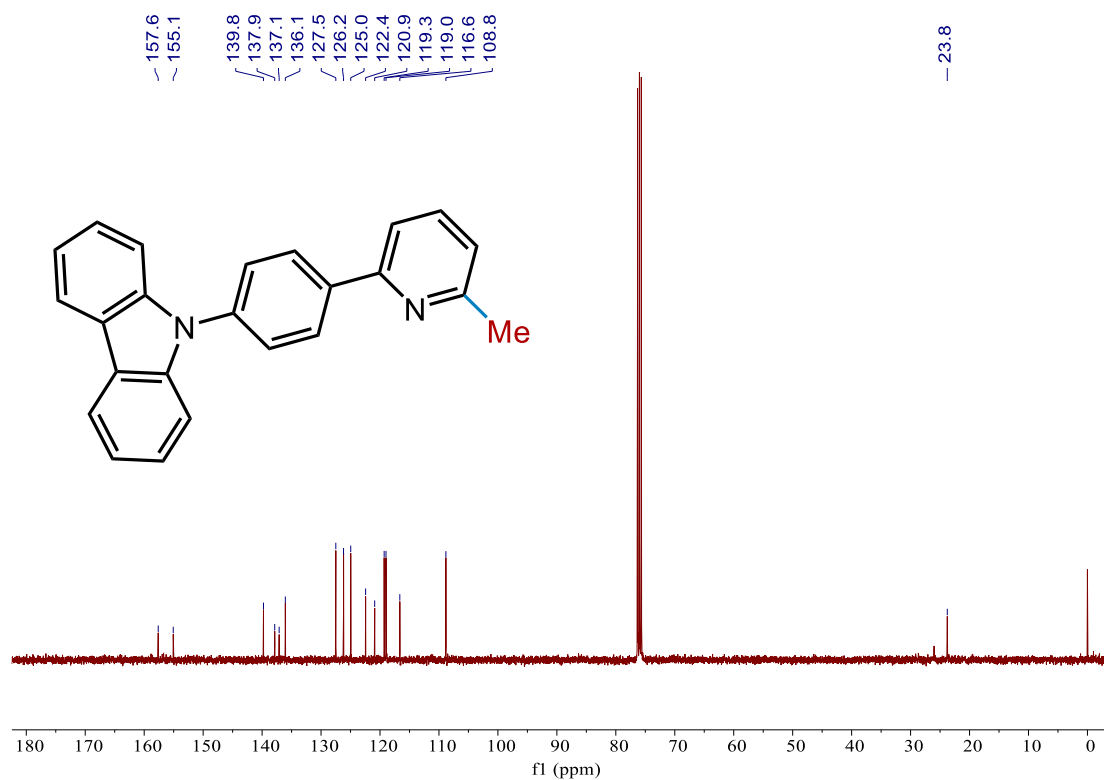 $^1\text{H}$  NMR (400 MHz, Chloroform-*d*) of compound **11**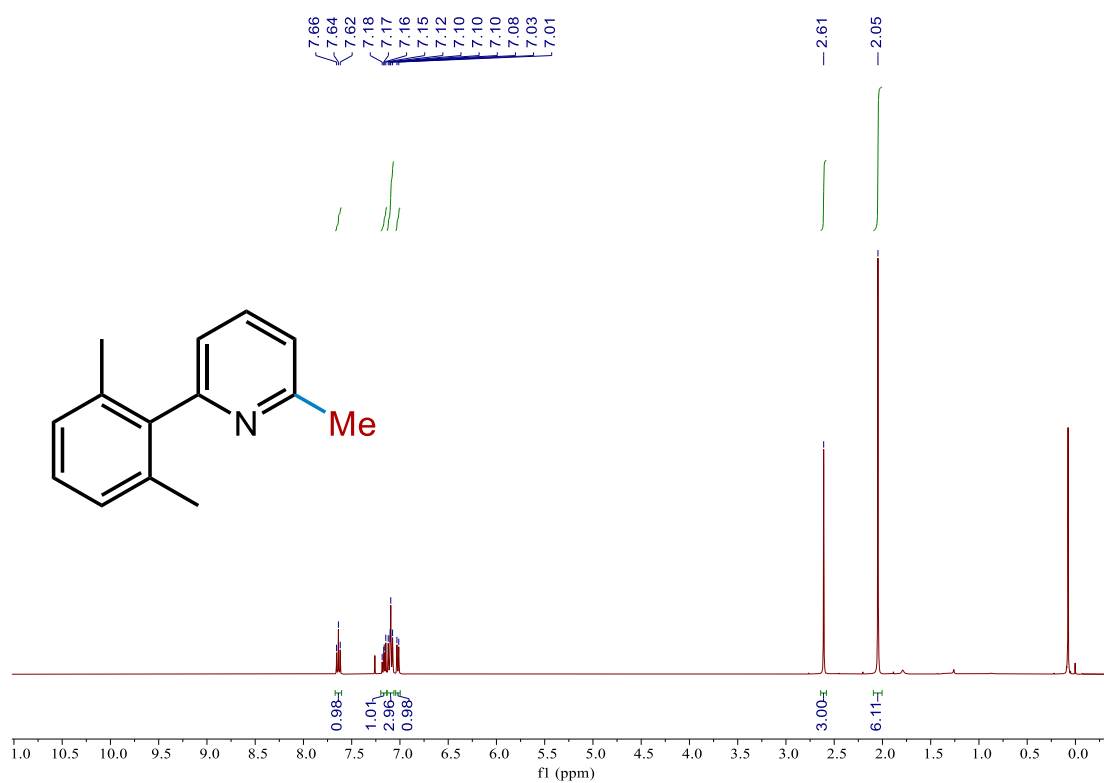

$^1\text{H}$  NMR (400 MHz, Chloroform-*d*) of compound **12**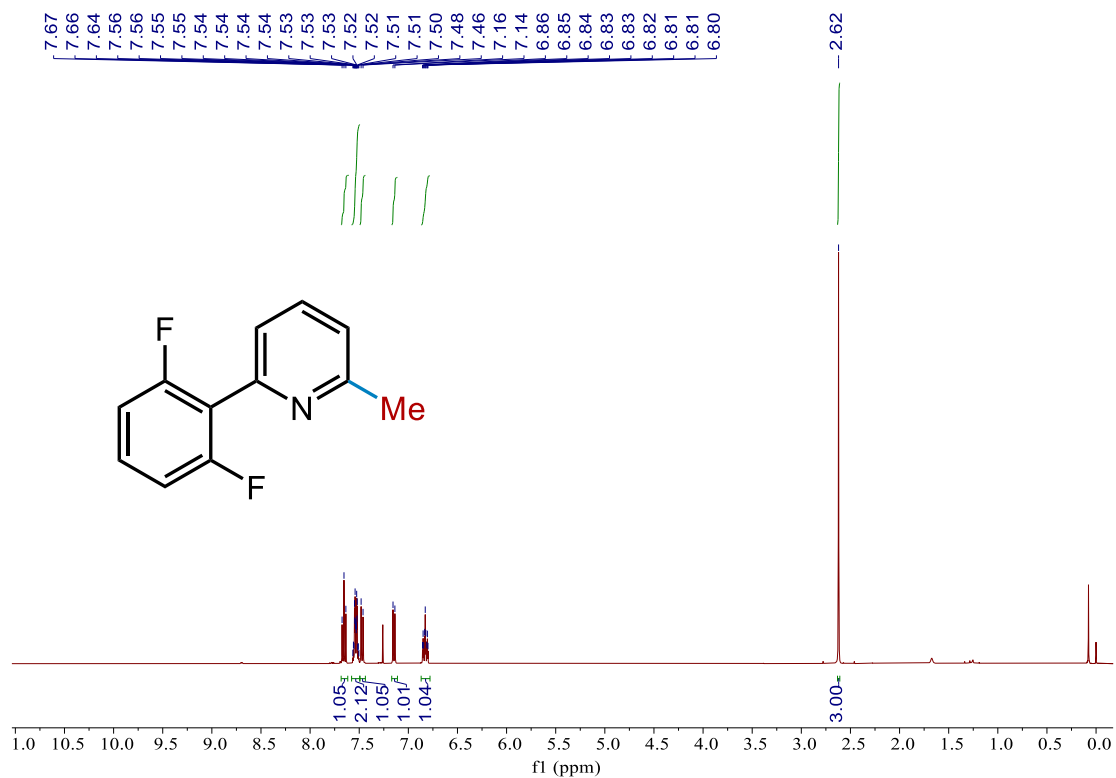 $^{19}\text{F}$  NMR (400 MHz, Chloroform-*d*) of compound **12**

CH-20250418-HSY-733.1.fid

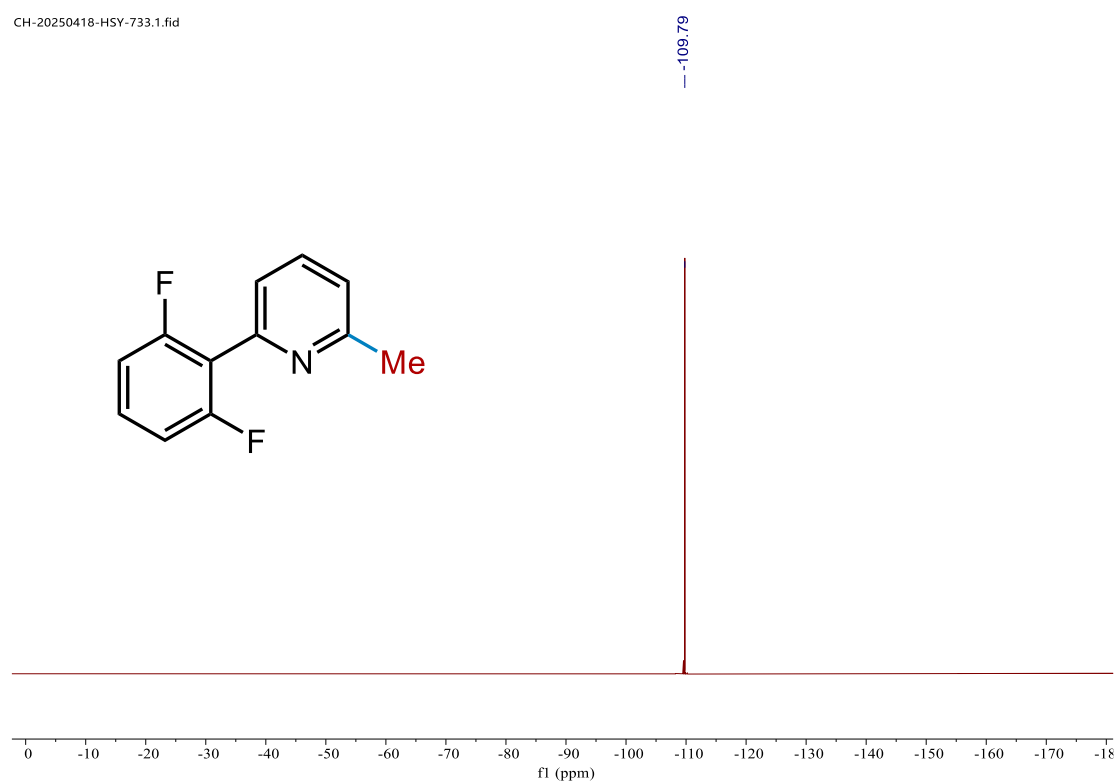

$^{13}\text{C}$  NMR (101 MHz, Chloroform-*d*) of compound **12**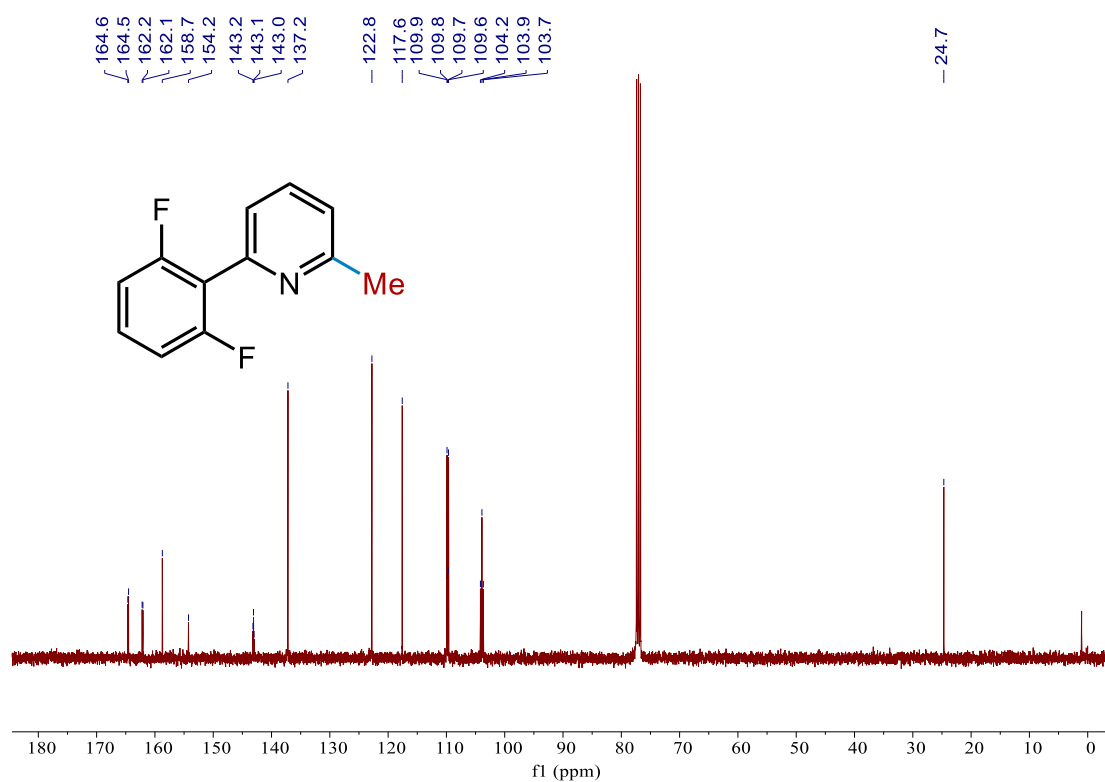 $^1\text{H}$  NMR (400 MHz, Chloroform-*d*) of compound **13**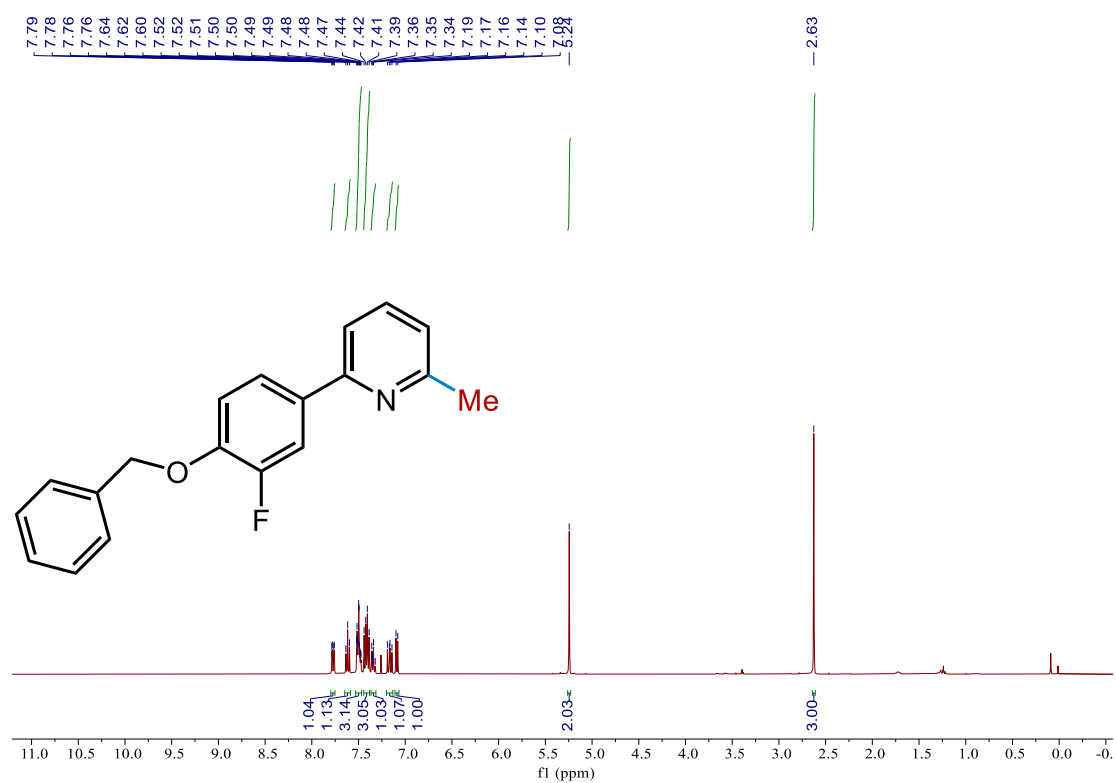

$^{19}\text{F}$  NMR (400 MHz, Chloroform-*d*) of compound **13**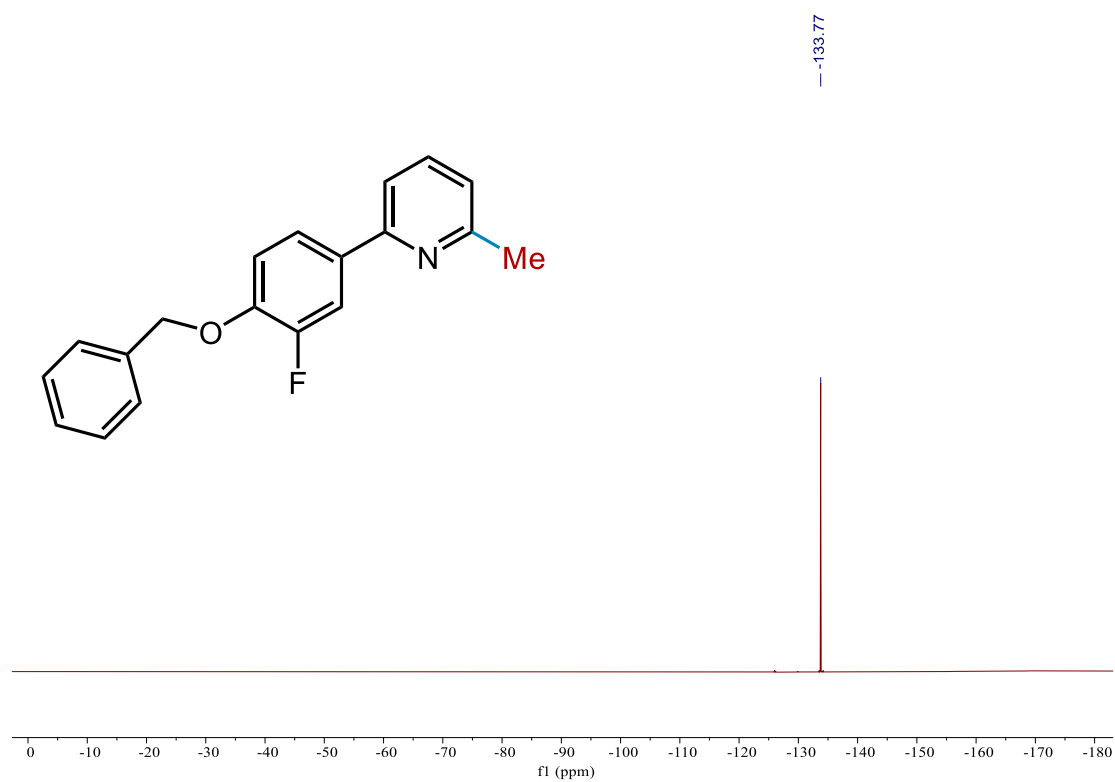 $^{13}\text{C}$  NMR (101 MHz, Chloroform-*d*) of compound **13**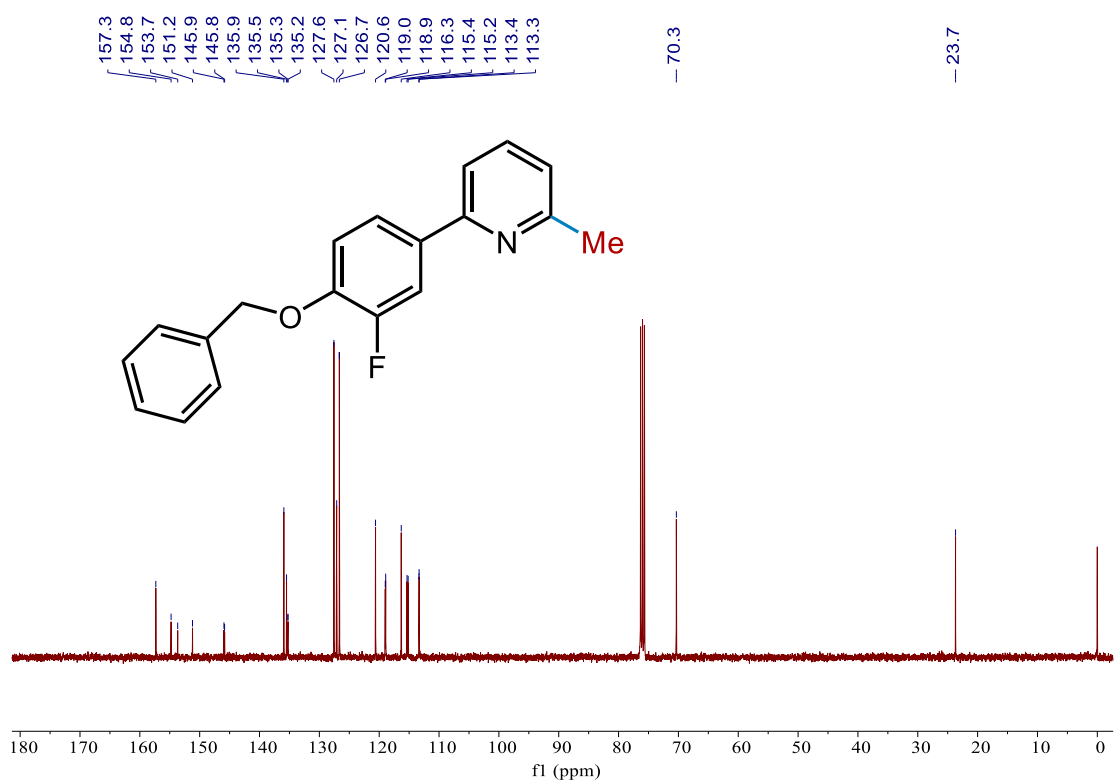

$^1\text{H}$  NMR (400 MHz,  $\text{DMSO-}d_6$ ) of compound **14**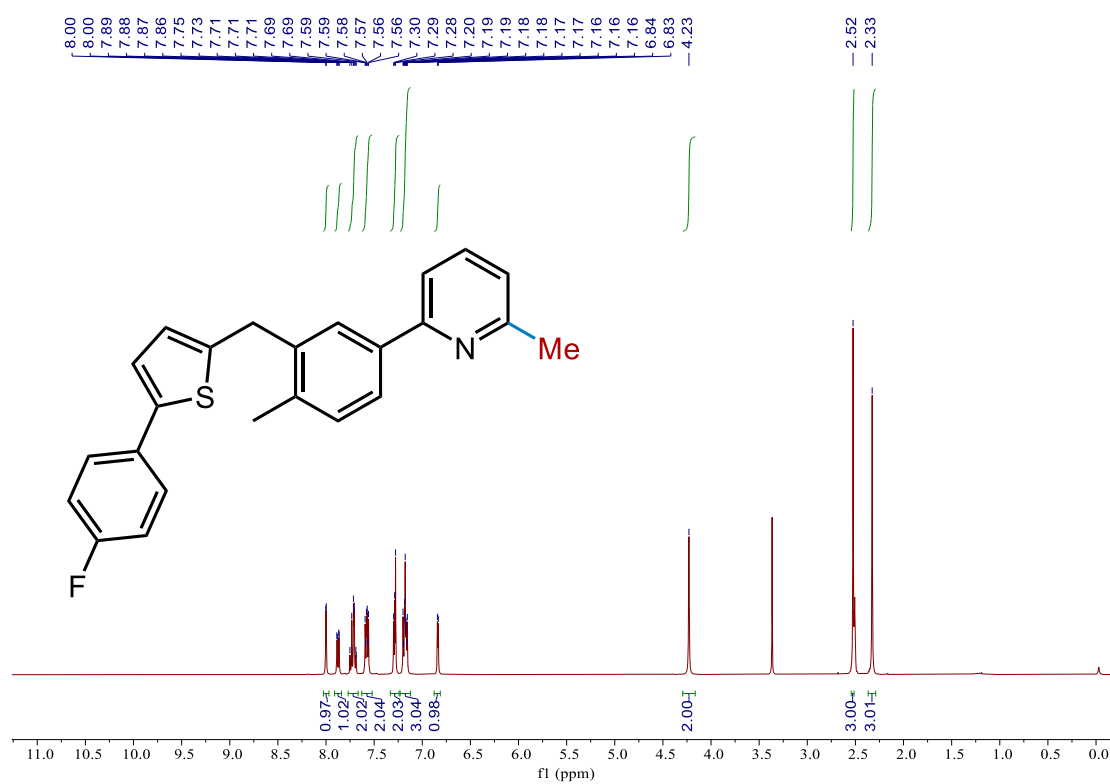 $^{19}\text{F}$  NMR (400 MHz,  $\text{DMSO-}d_6$ ) of compound **14**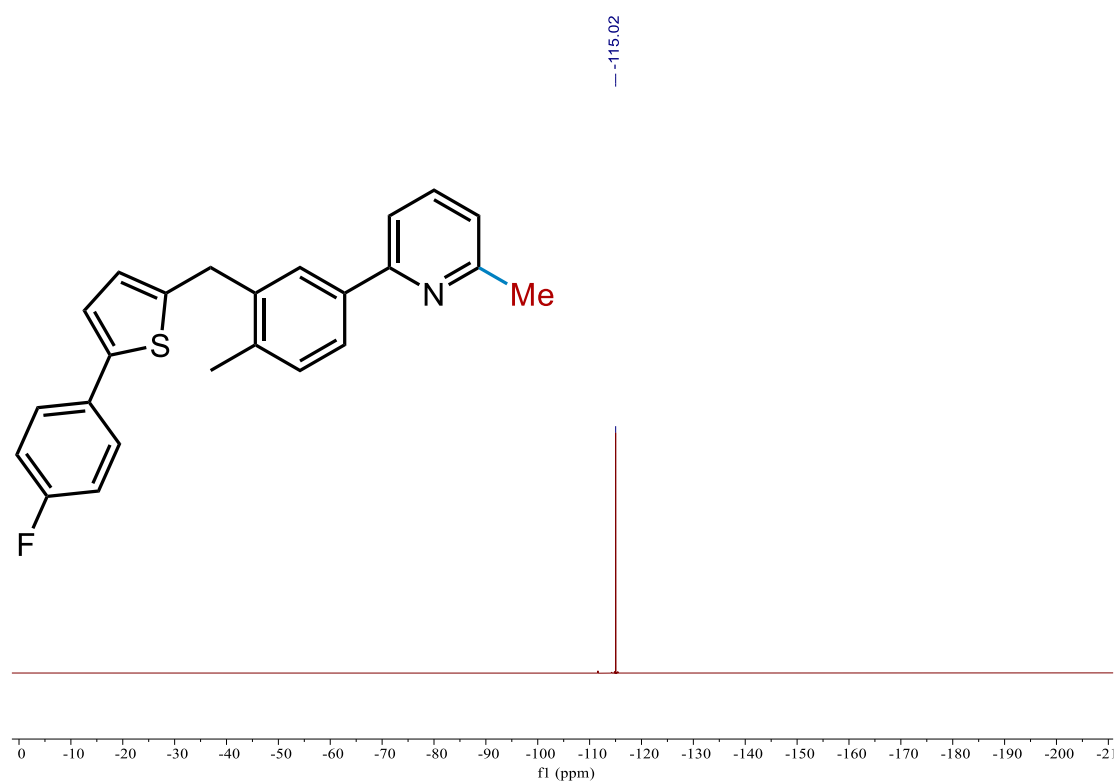

$^{13}\text{C}$  NMR (101 MHz,  $\text{DMSO-}d_6$ ) of compound **14**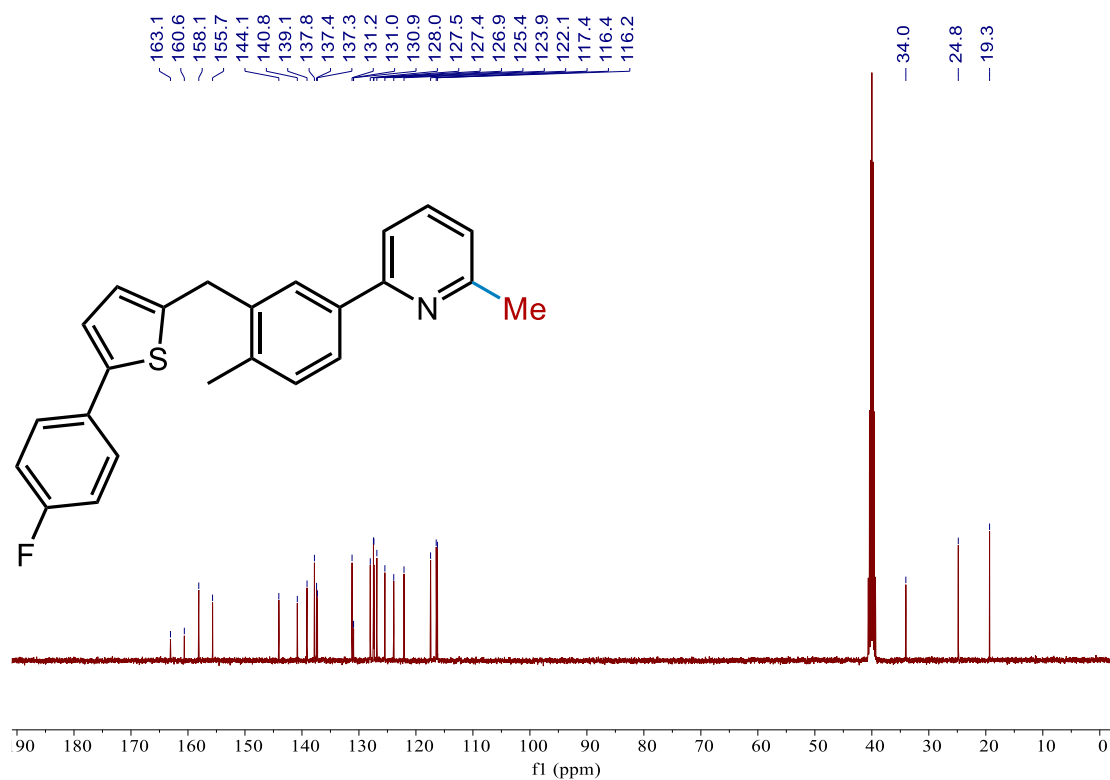 $^1\text{H}$  NMR (400 MHz,  $\text{Chloroform-}d$ ) of compound **15**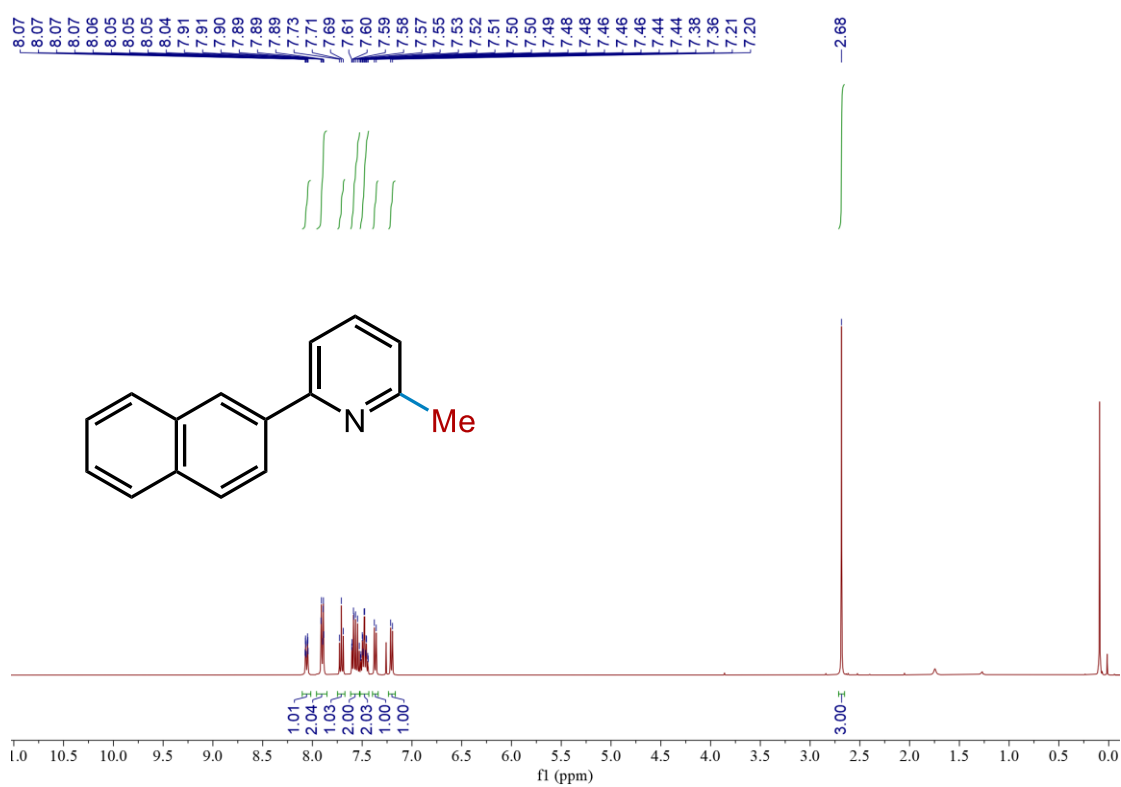

$^1\text{H}$  NMR (400 MHz, Chloroform-*d*) of compound **16**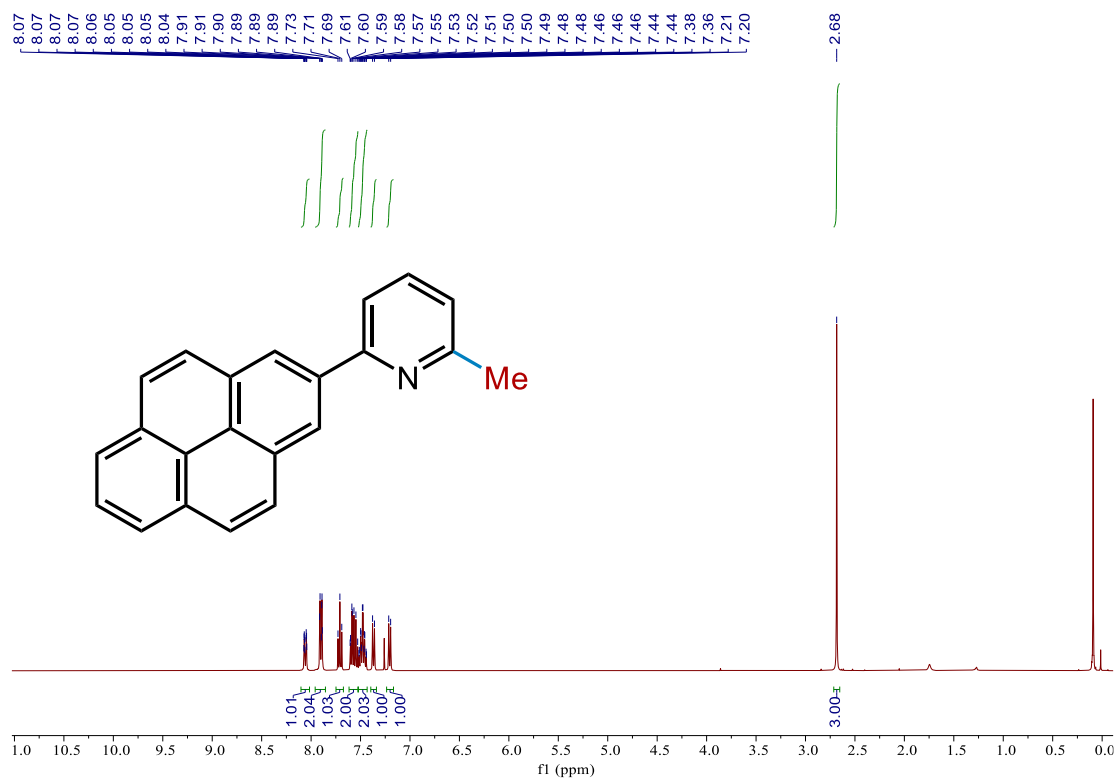 $^{13}\text{C}$  NMR (101 MHz, Chloroform-*d*) of compound **16**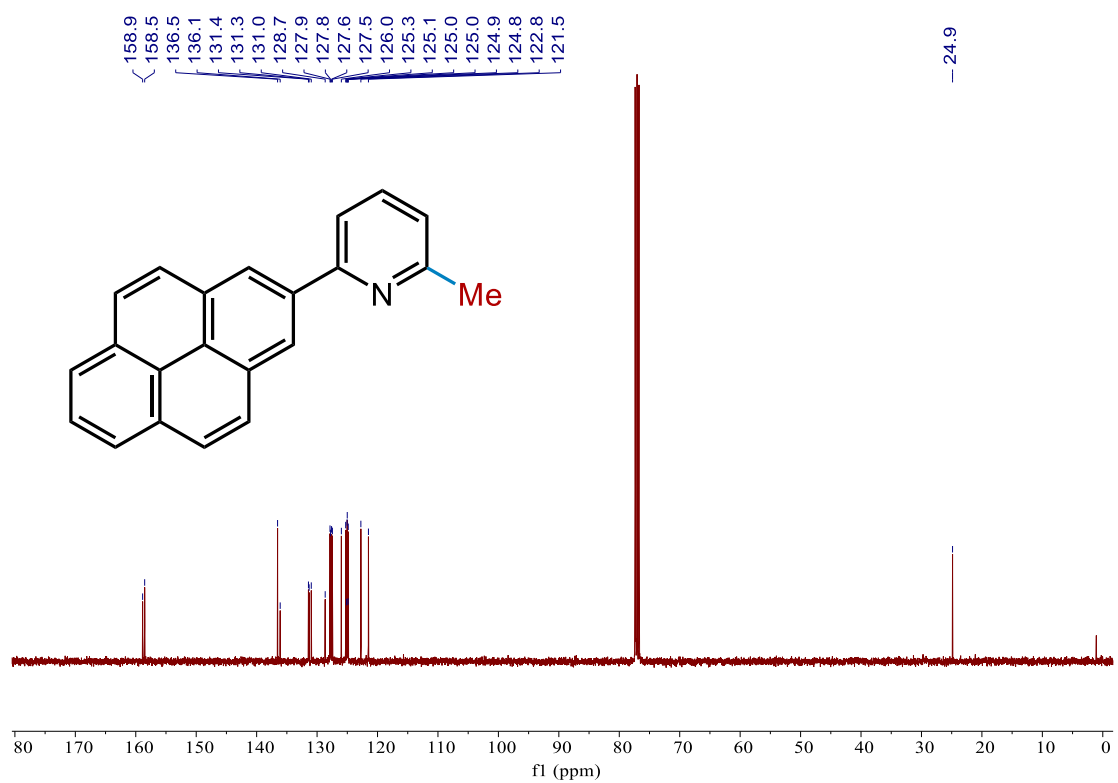

$^1\text{H}$  NMR (400 MHz, Chloroform-*d*) of compound **17**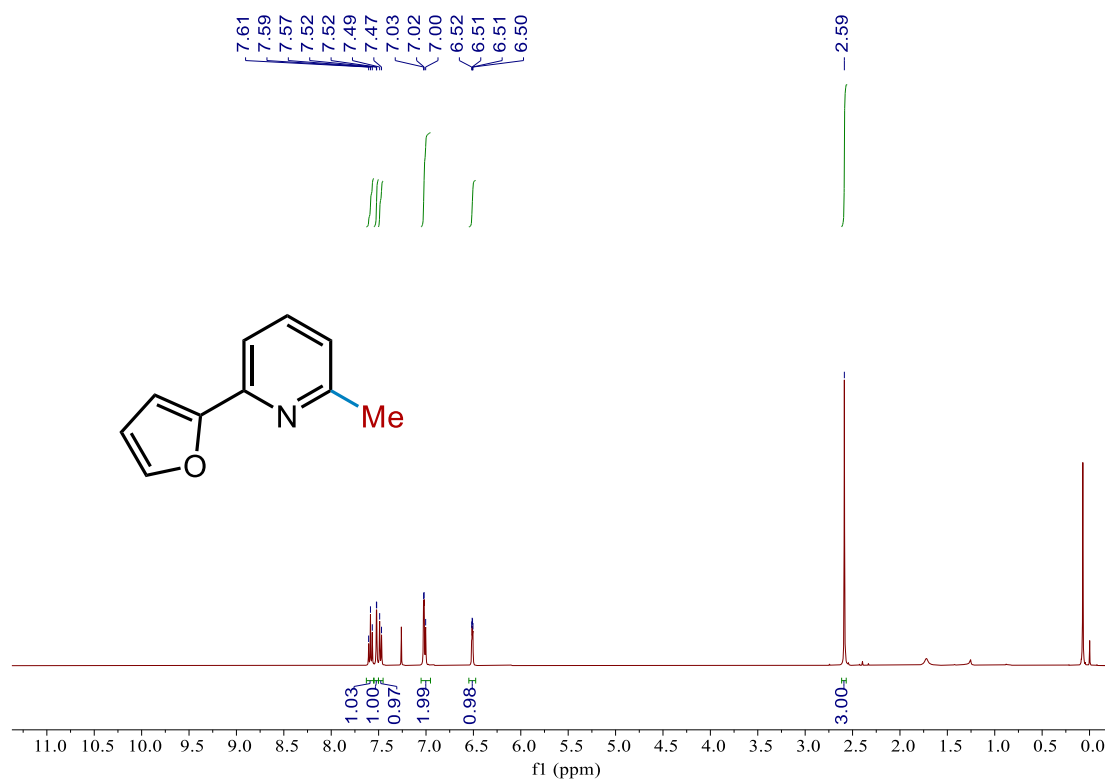 $^1\text{H}$  NMR (400 MHz, Chloroform-*d*) of compound **18**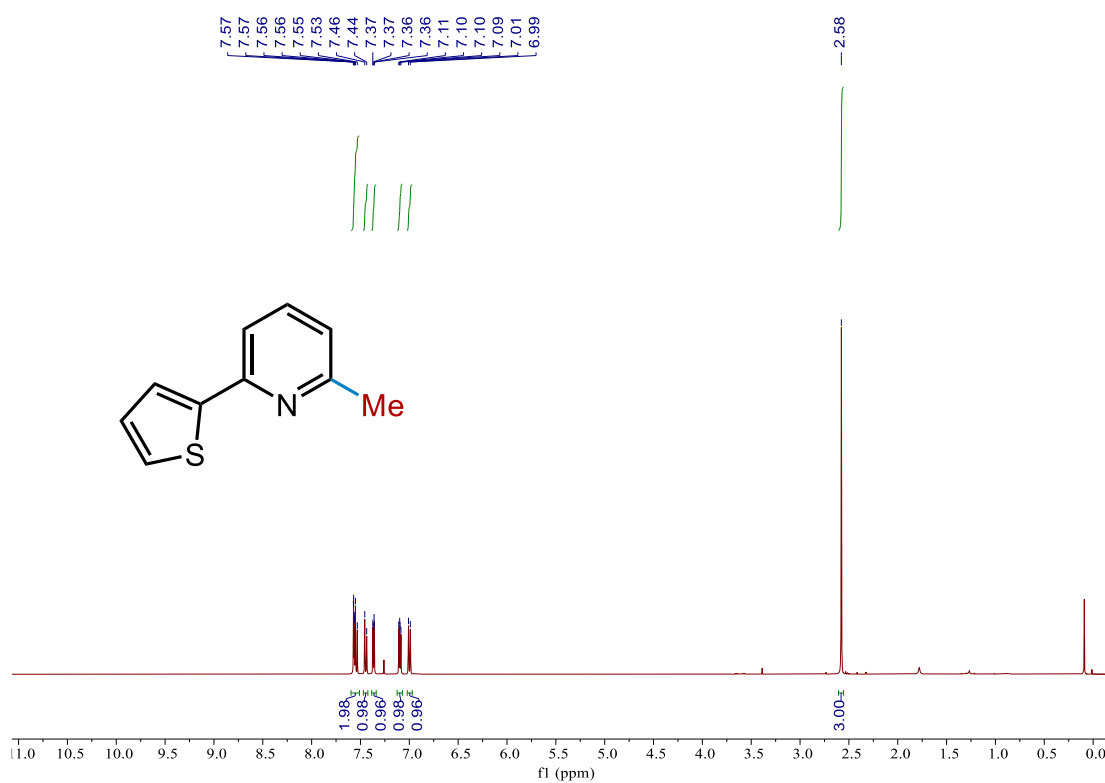

$^{13}\text{C}$  NMR (101 MHz, Chloroform-*d*) of compound **18**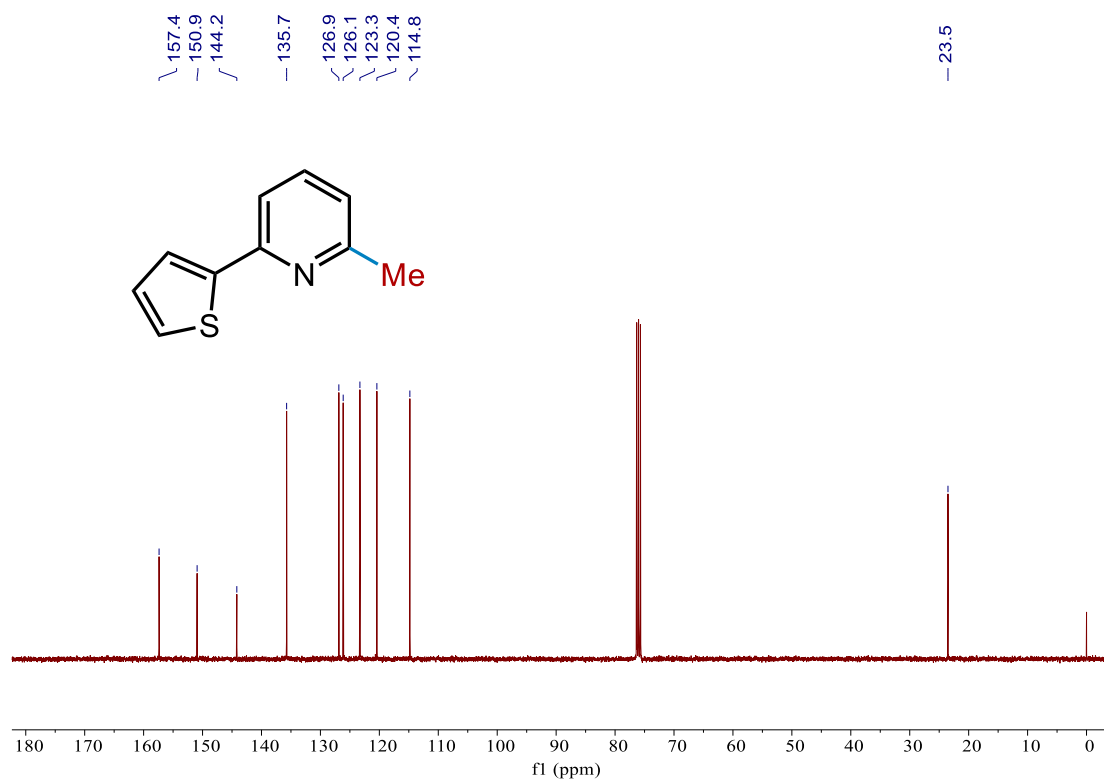 $^1\text{H}$  NMR (101 MHz, Chloroform-*d*) of compound **19**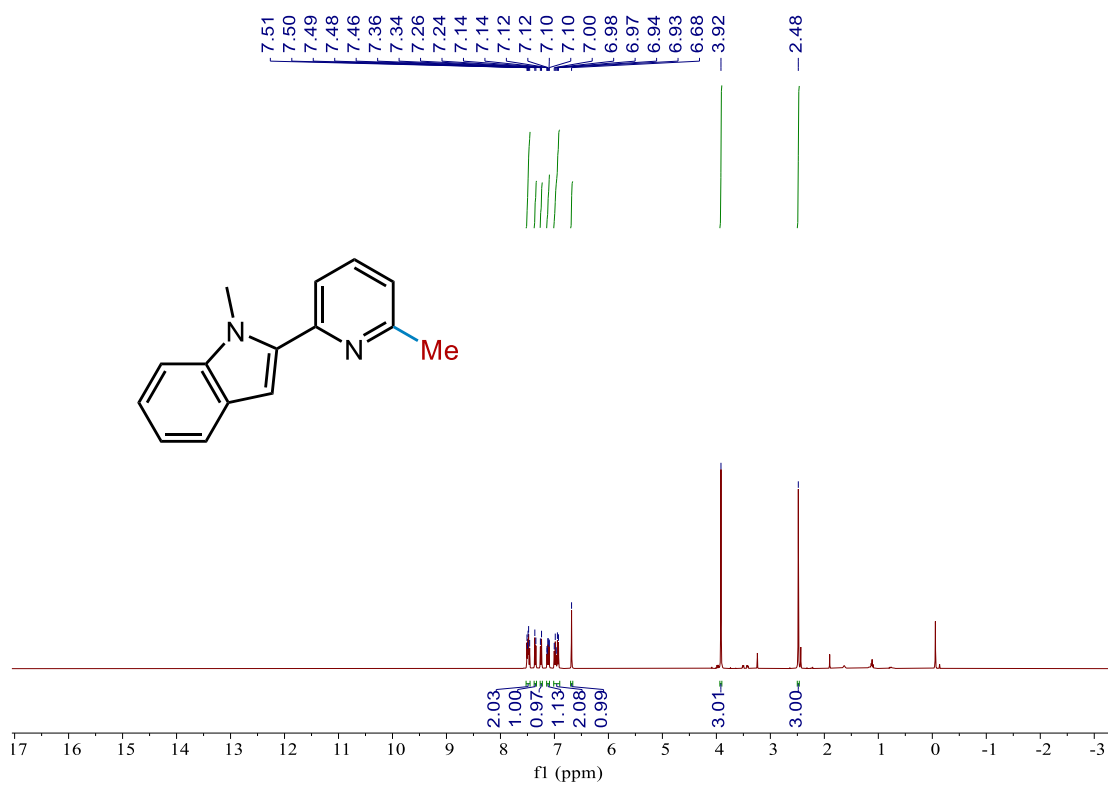

$^{13}\text{C}$  NMR (101 MHz, Chloroform-*d*) of compound **19**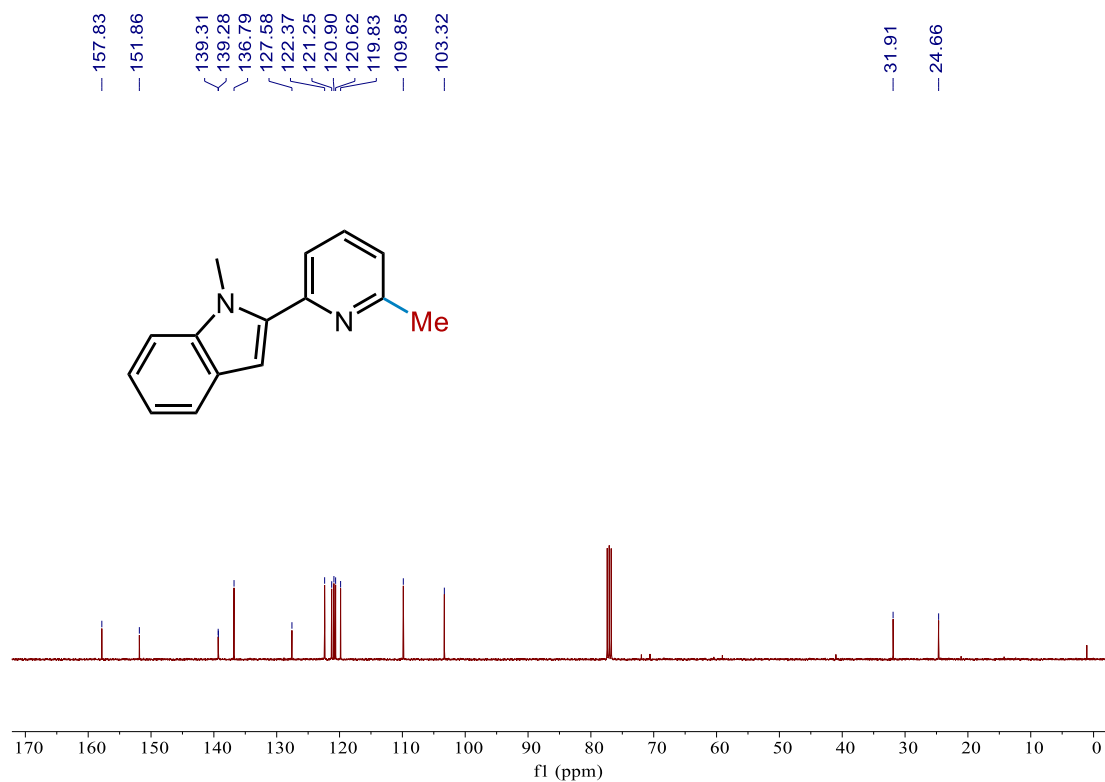 $^1\text{H}$  NMR (400 MHz, Chloroform-*d*) of compound **20**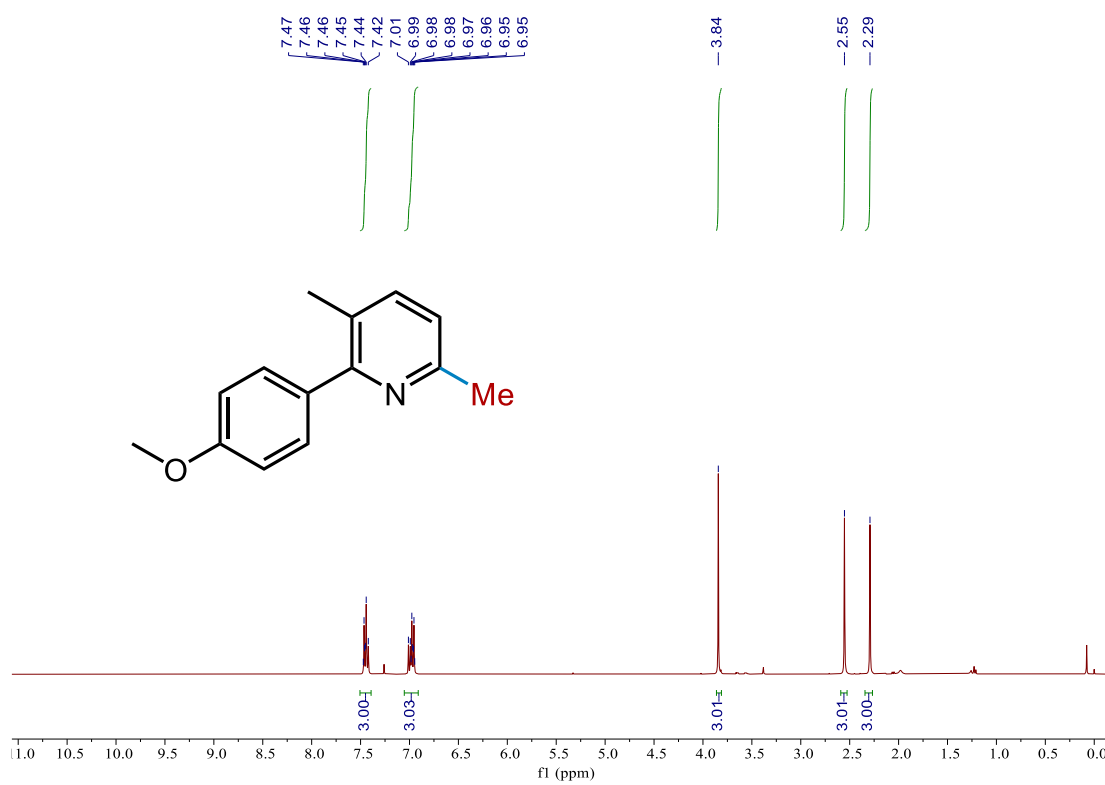

$^1\text{H}$  NMR (400 MHz, Chloroform-*d*) of compound **21**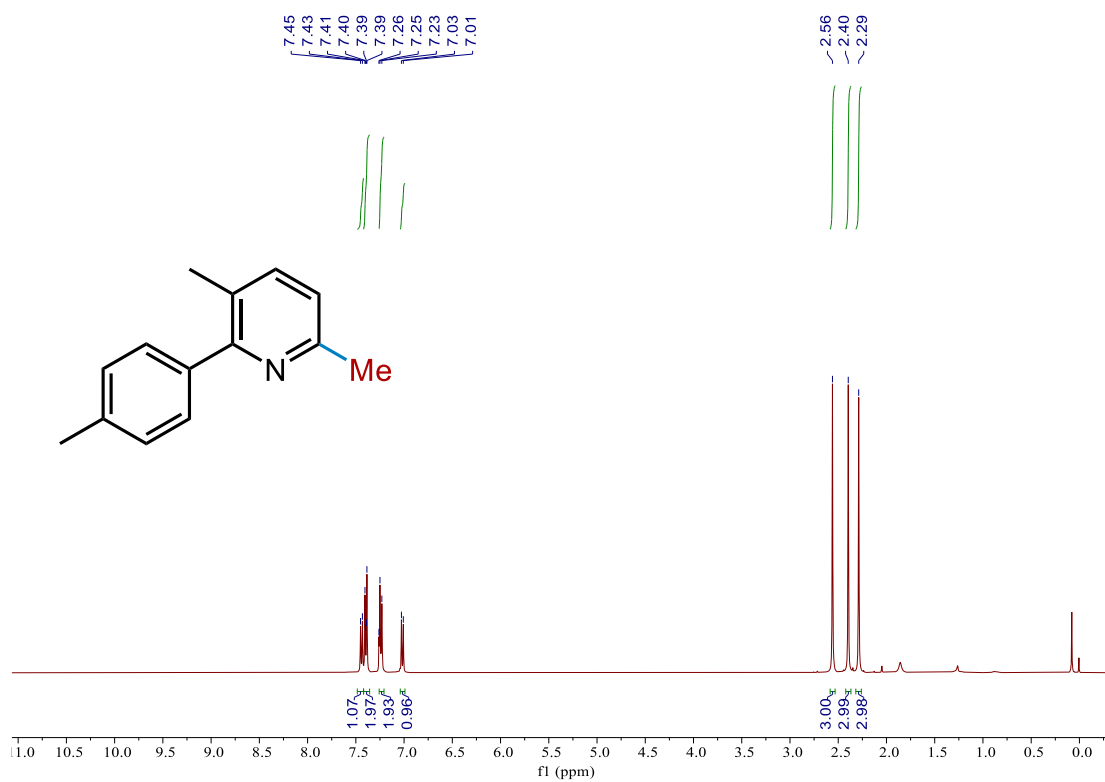 $^{13}\text{C}$  NMR (101 MHz, Chloroform-*d*) of compound **21**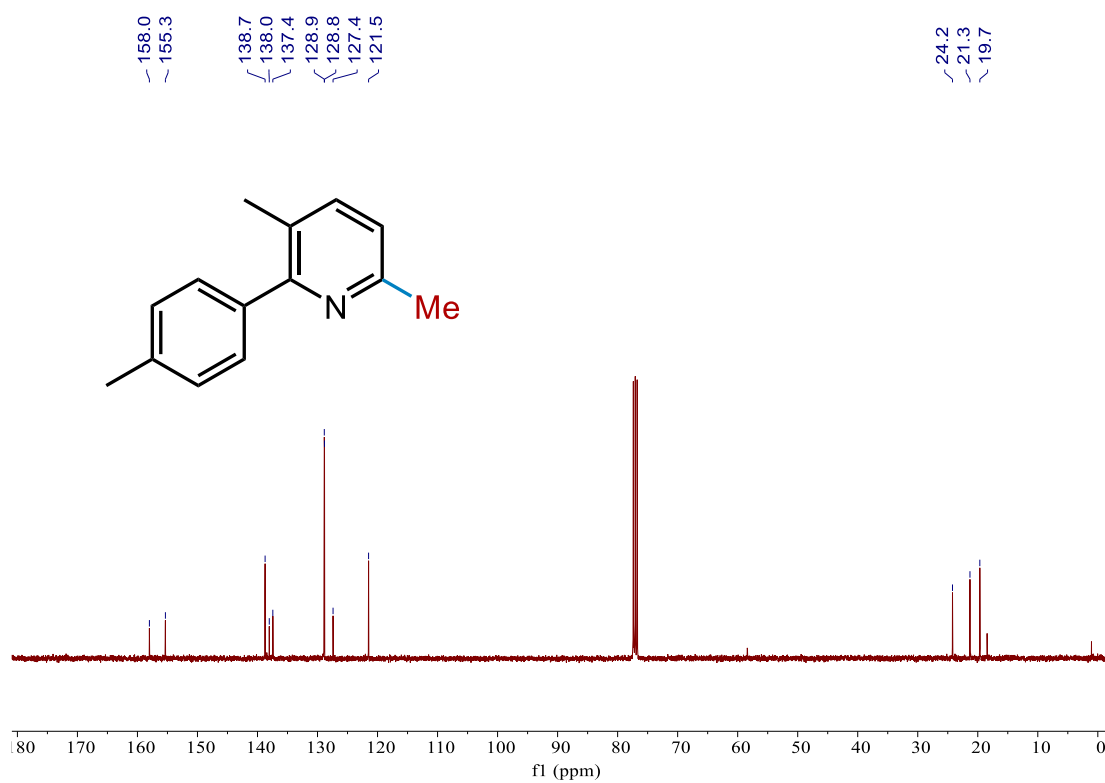

$^1\text{H}$  NMR (400 MHz, Chloroform-*d*) of compound **22**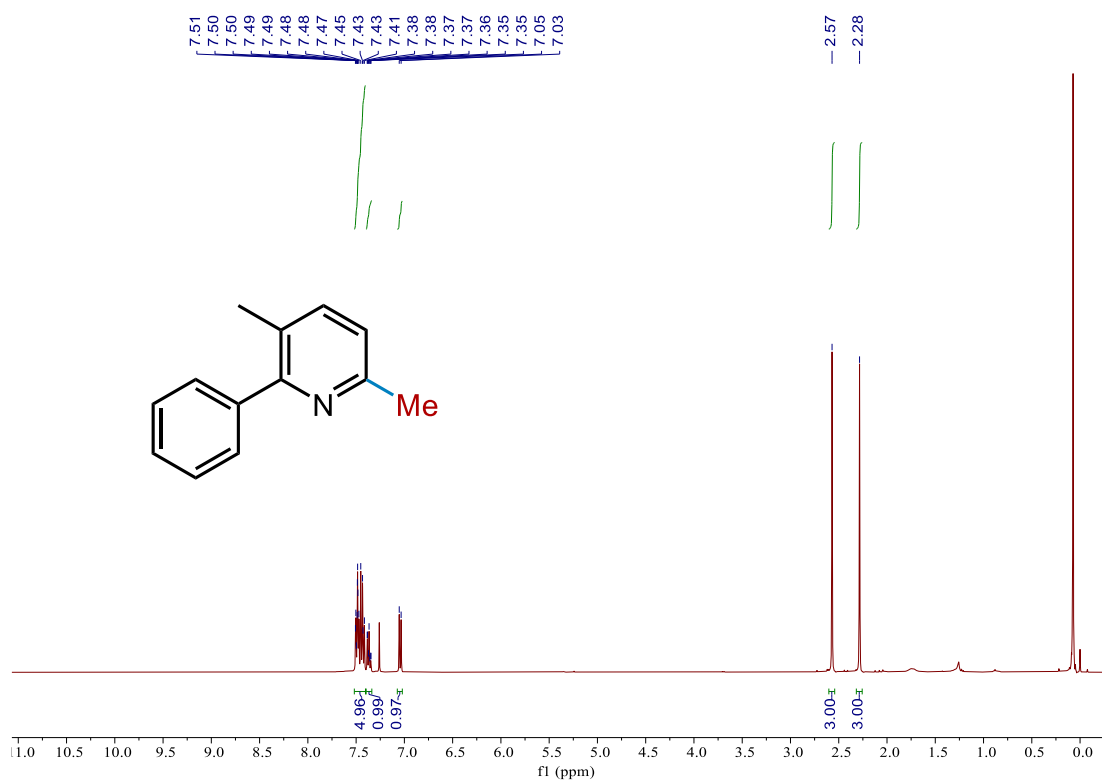 $^1\text{H}$  NMR (400 MHz, Chloroform-*d*) of compound **23**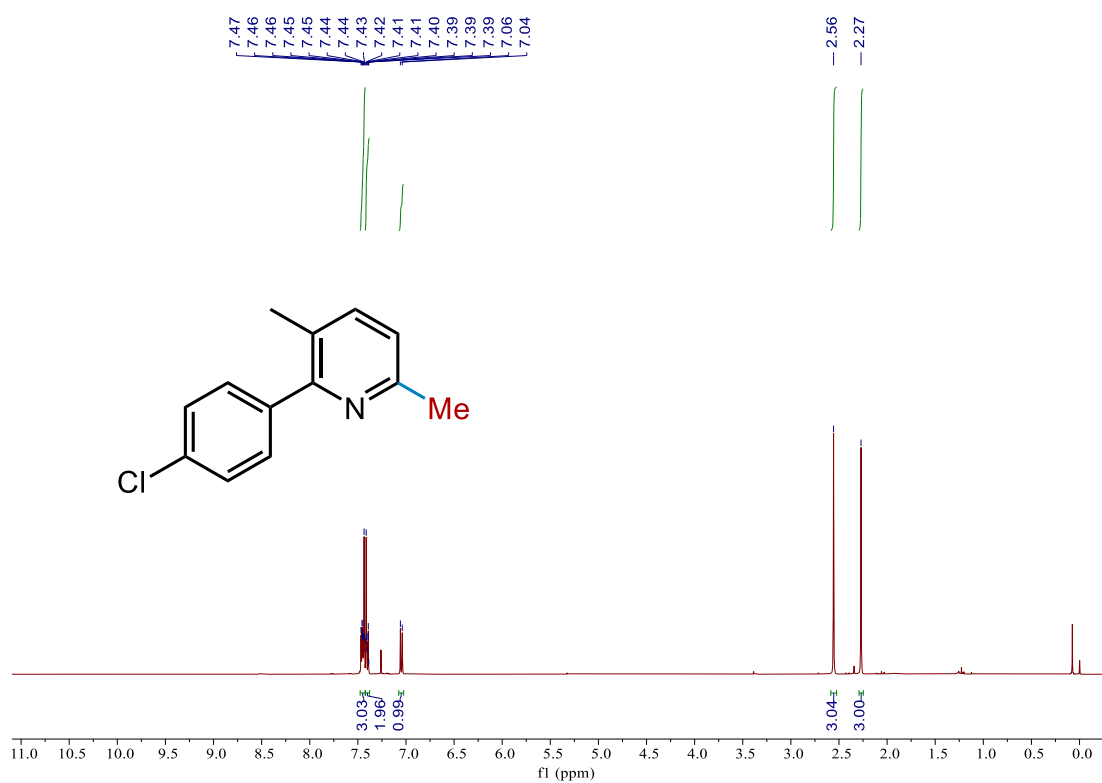

$^{13}\text{C}$  NMR (101 MHz, Chloroform-*d*) of compound **23**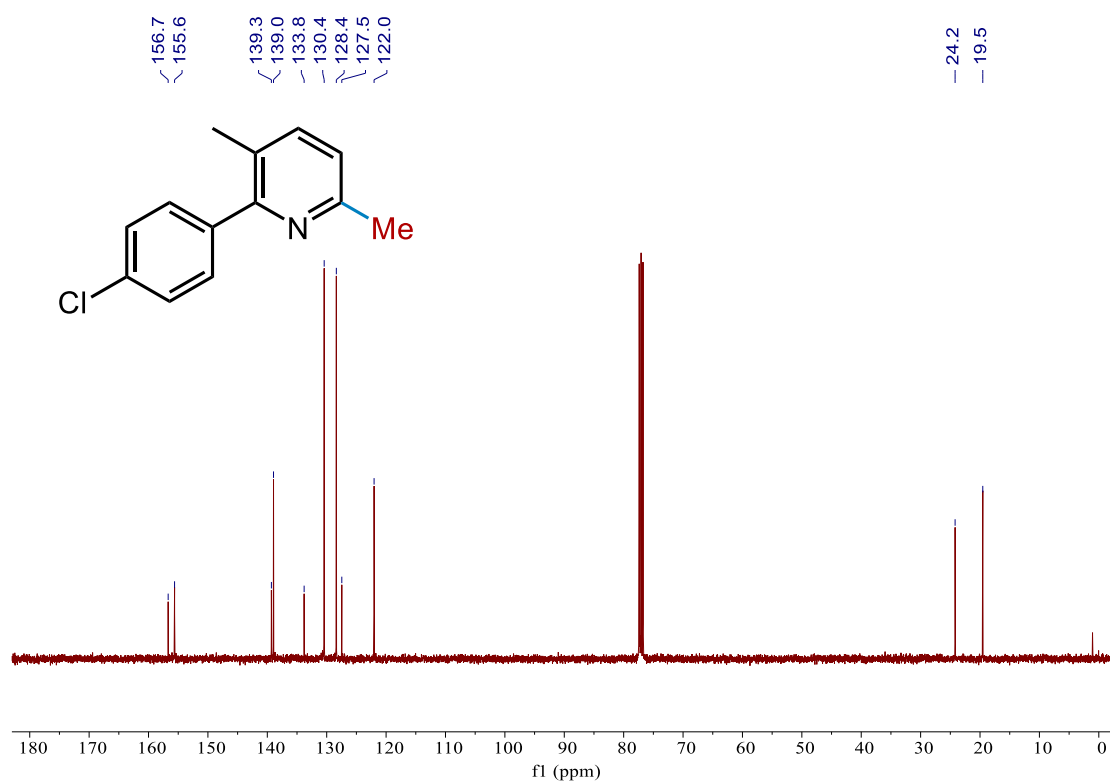 $^1\text{H}$  NMR (400 MHz, Chloroform-*d*) of compound **24**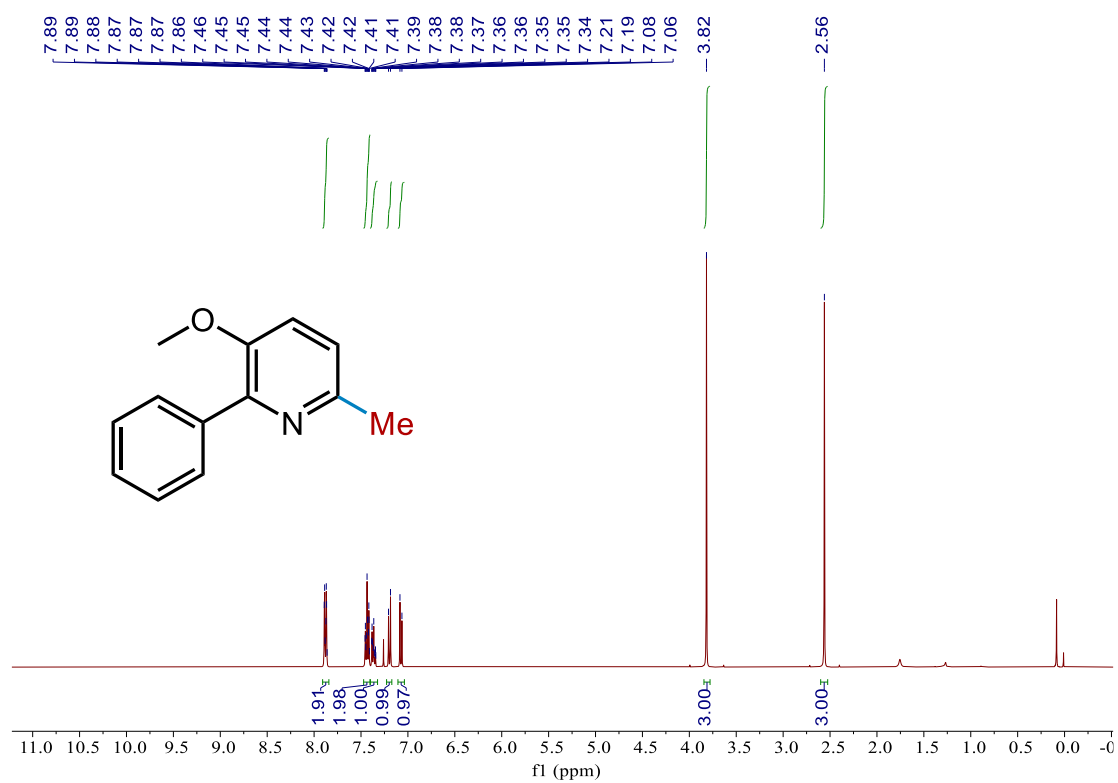

$^{13}\text{C}$  NMR (101 MHz, Chloroform-*d*) of compound **24**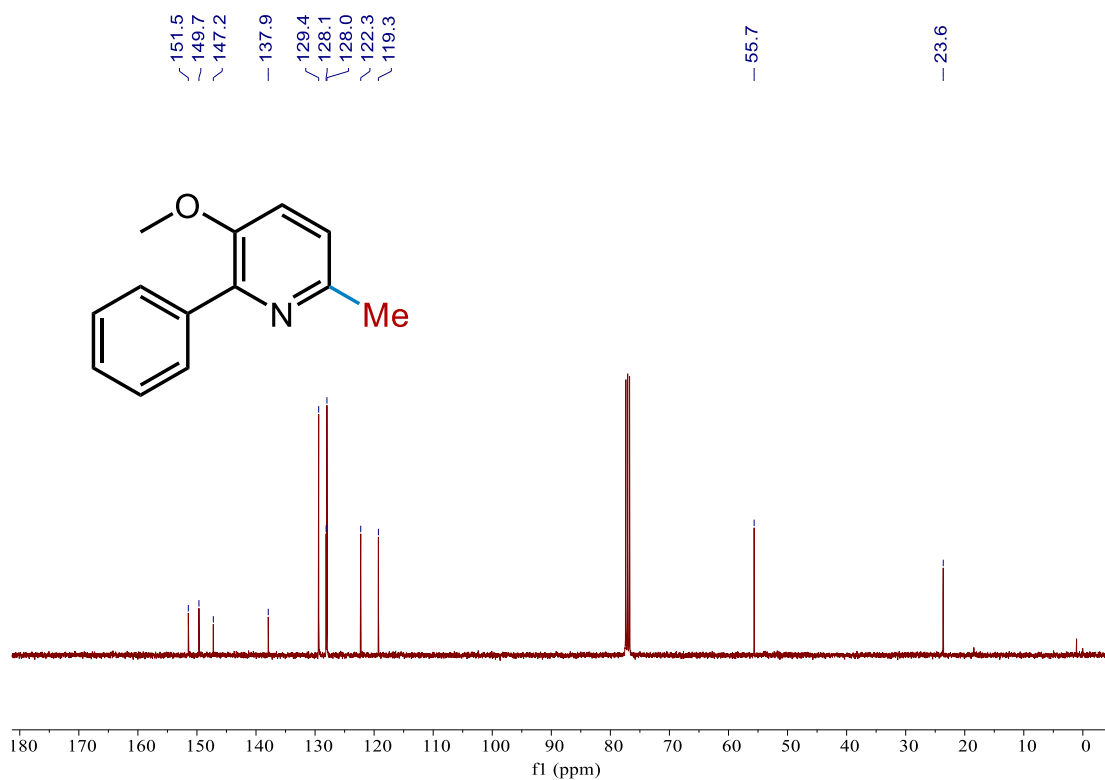 $^1\text{H}$  NMR (400 MHz, Chloroform-*d*) of compound **25**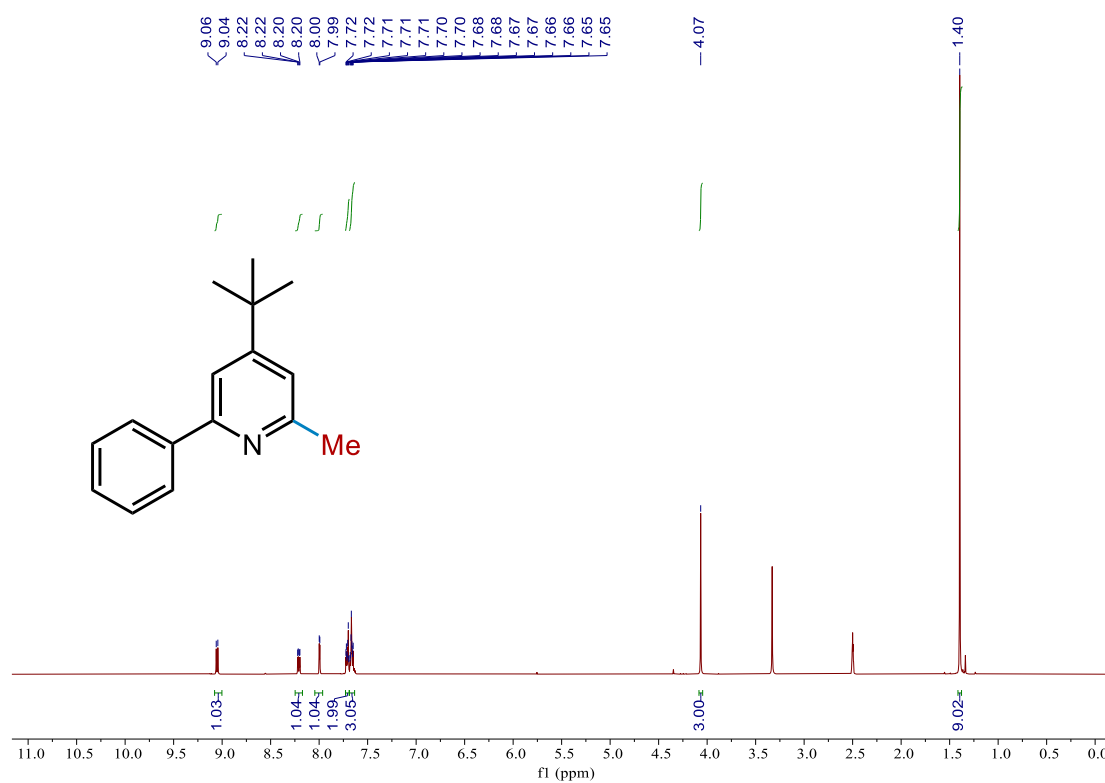

$^{13}\text{C}$  NMR (101 MHz, Chloroform-*d*) of compound **25**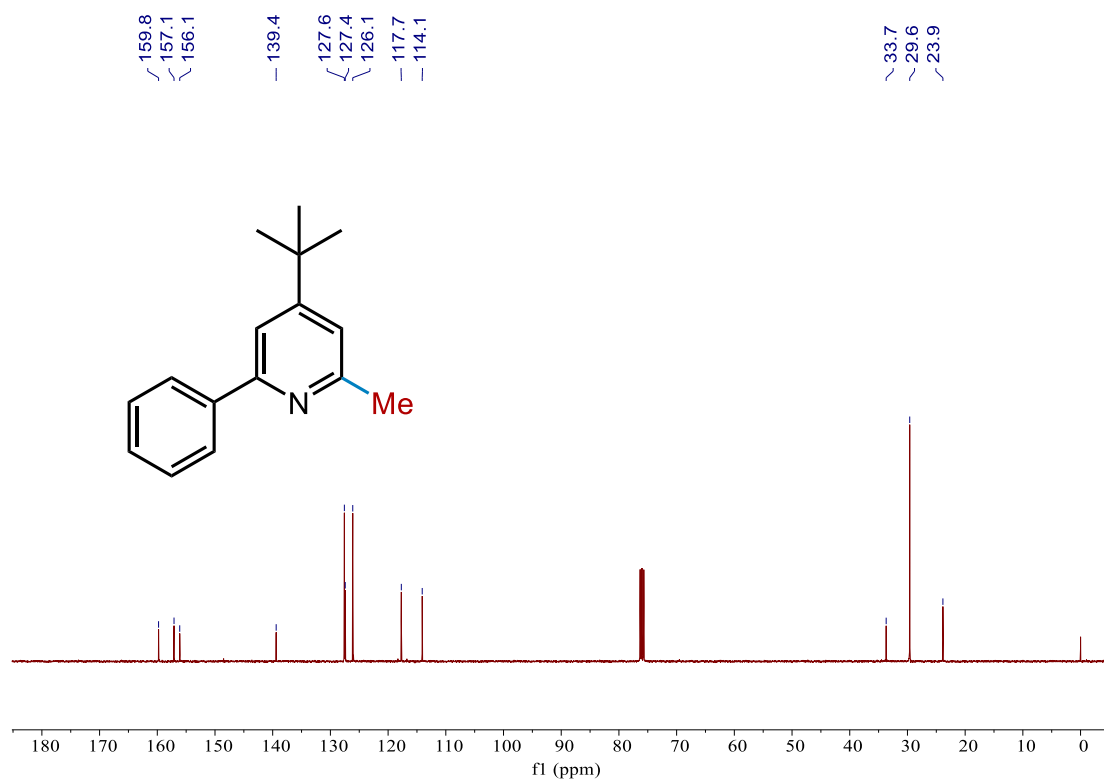 $^1\text{H}$  NMR (400 MHz, Chloroform-*d*) of compound **26**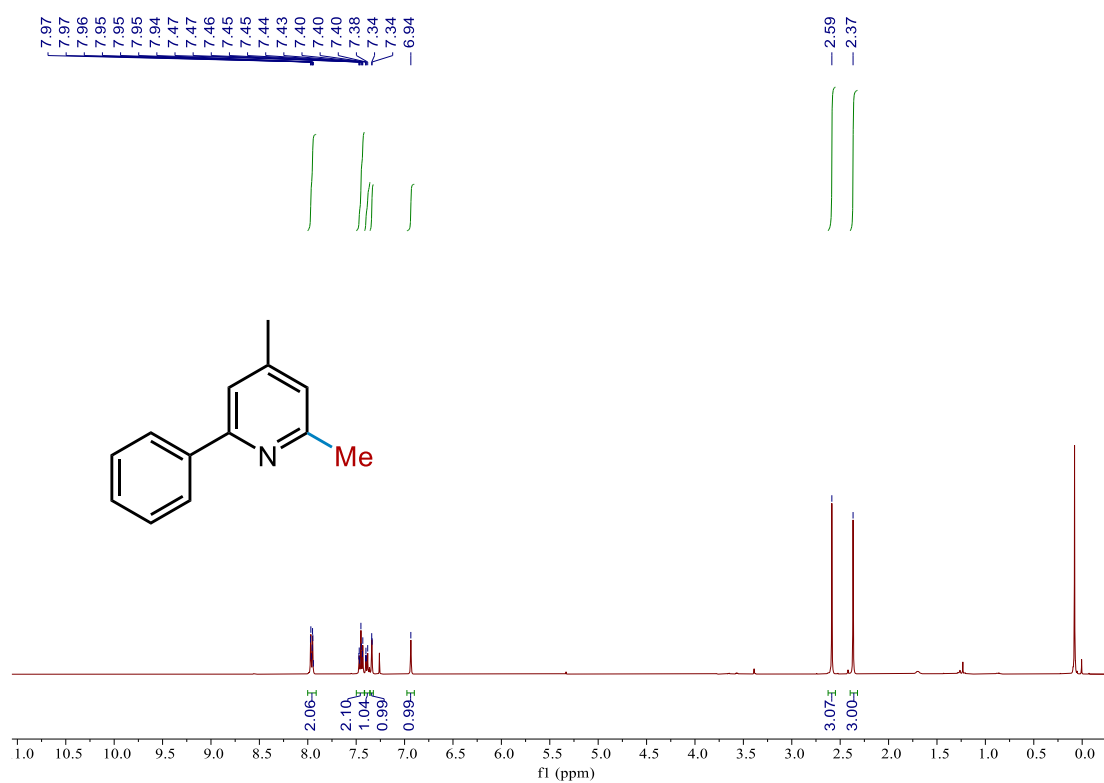

$^{13}\text{C}$  NMR (101 MHz, Chloroform-*d*) of compound **26**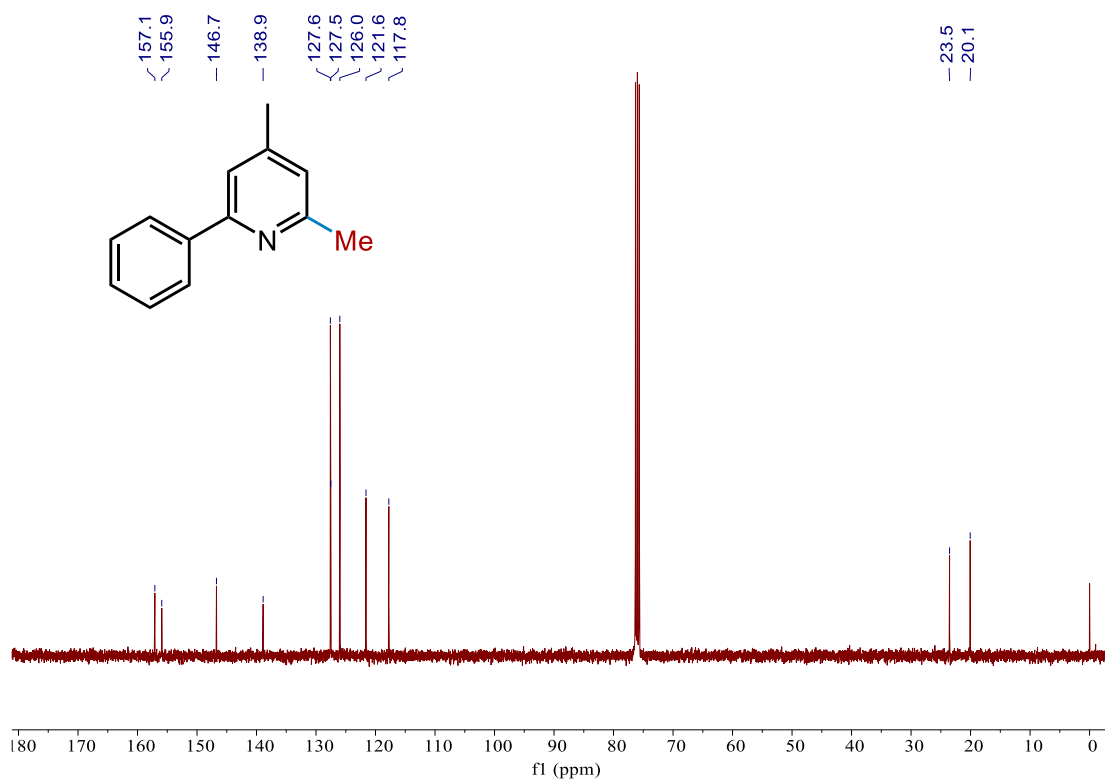 $^1\text{H}$  NMR (400 MHz, Chloroform-*d*) of compound **27**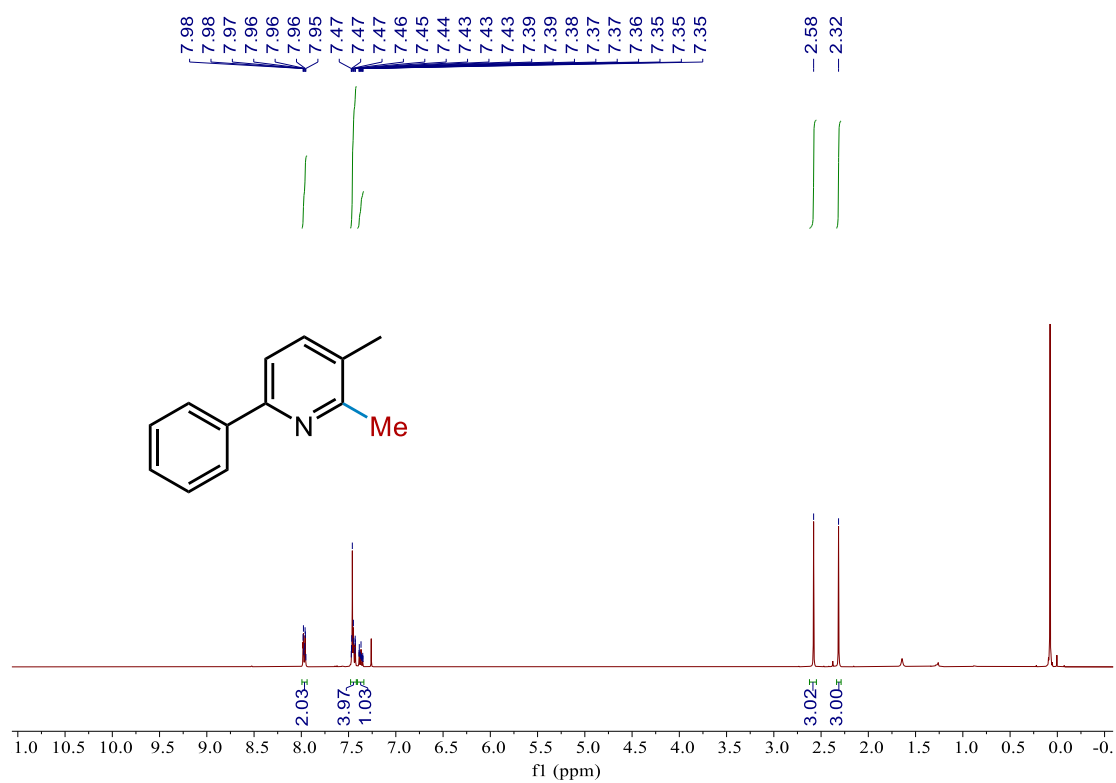

$^1\text{H}$  NMR (400 MHz, Chloroform-*d*) of compound **28**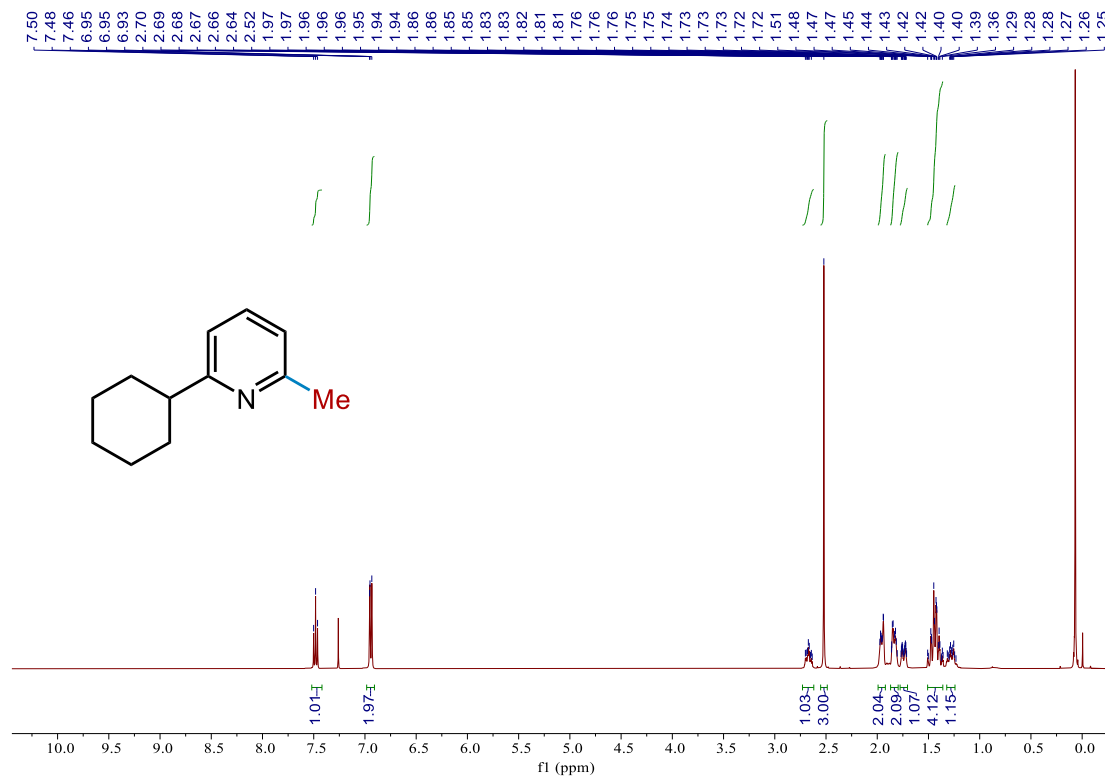 $^1\text{H}$  NMR (400 MHz, Chloroform-*d*) of compound **29**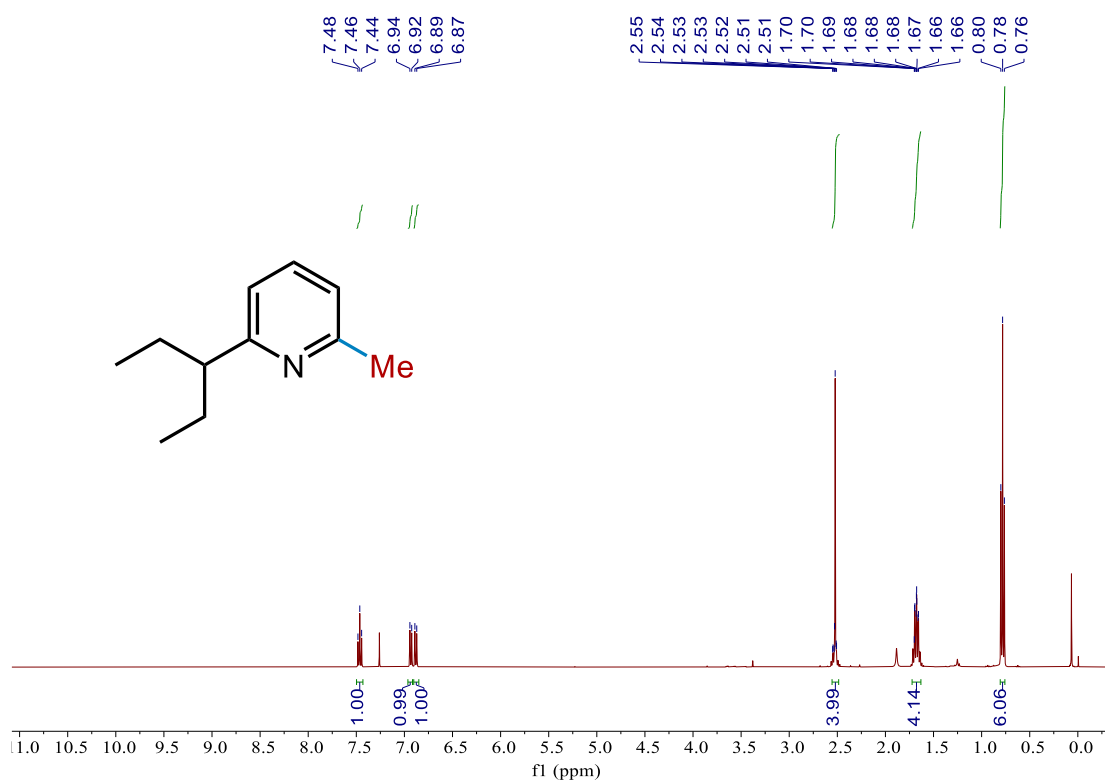

$^{13}\text{C}$  NMR (101 MHz, Chloroform-*d*) of compound **29**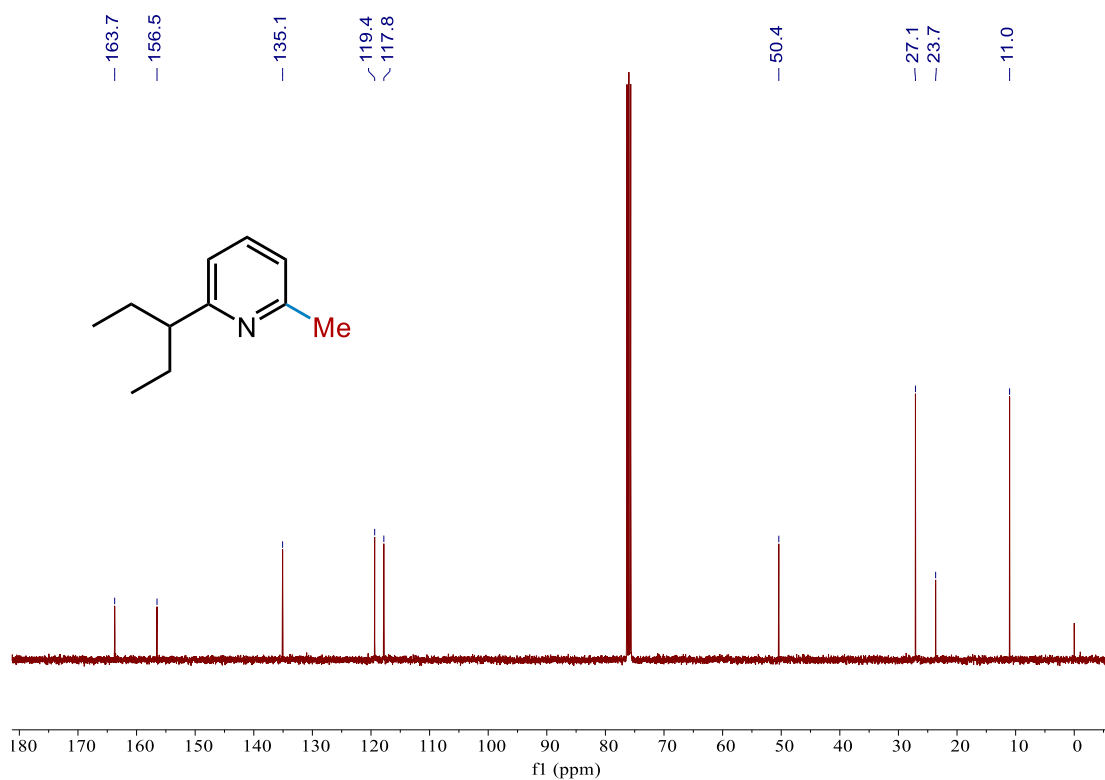 $^1\text{H}$  NMR (400 MHz, Chloroform-*d*) of compound **30**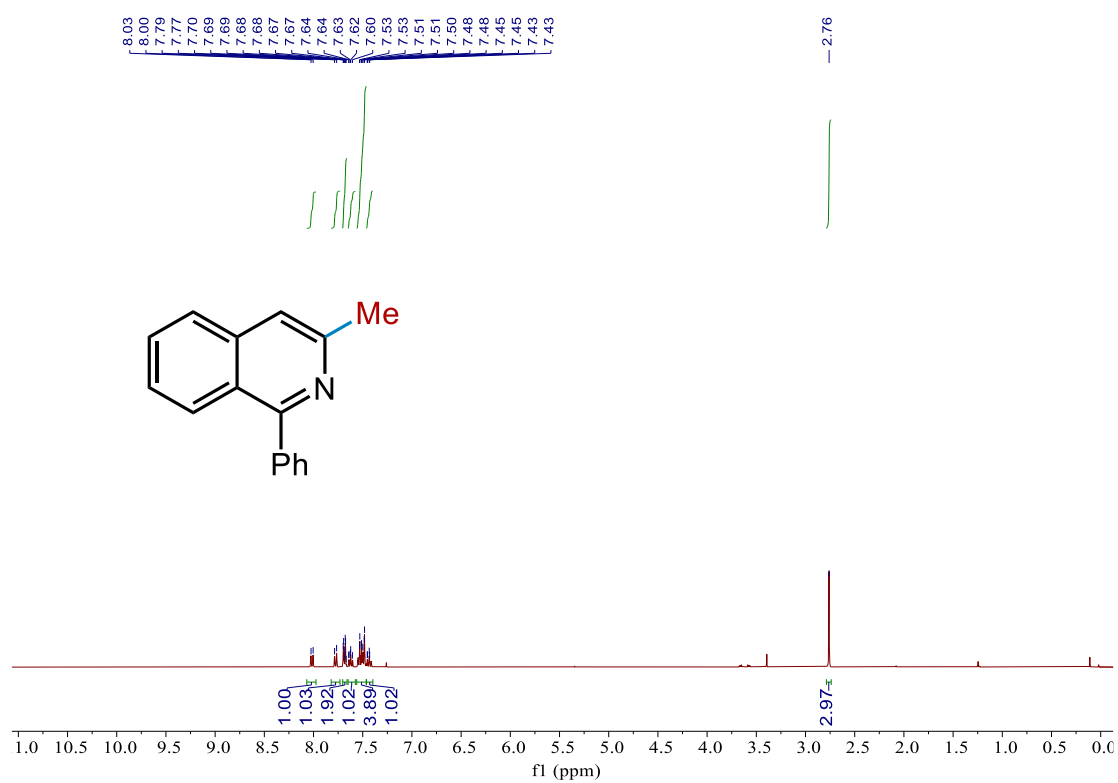

$^1\text{H}$  NMR (400 MHz, Chloroform-*d*) of compound **31**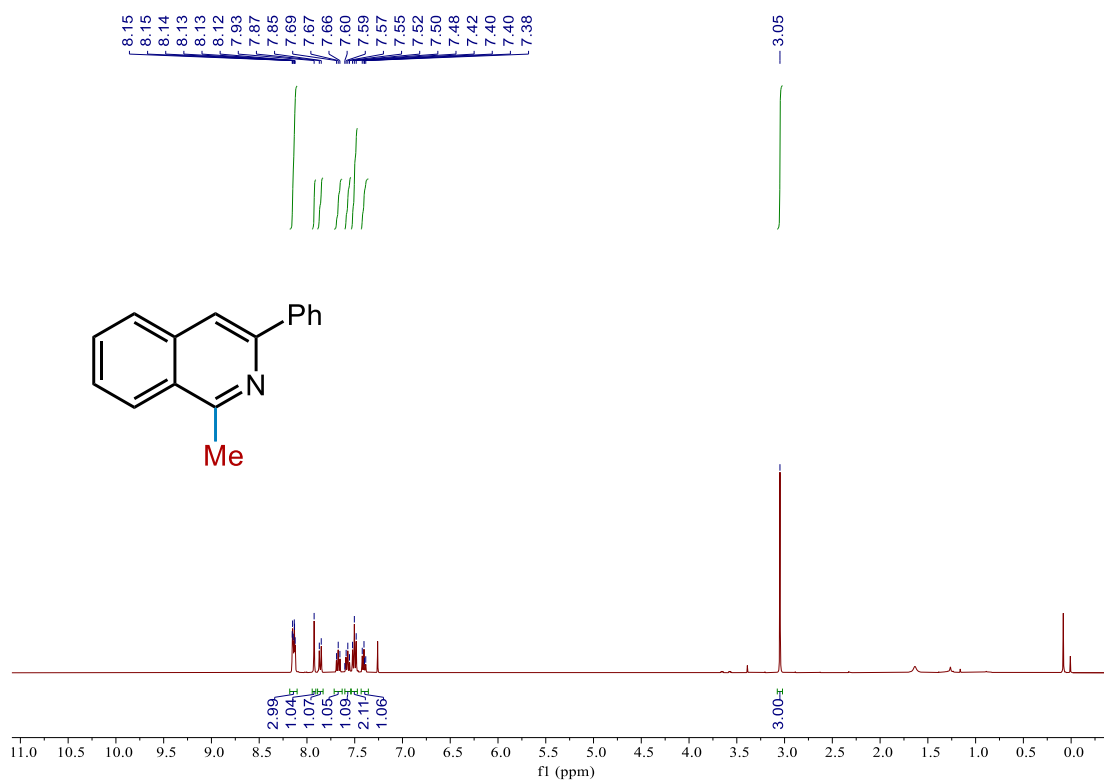 $^1\text{H}$  NMR (400 MHz, Chloroform-*d*) of compound **32**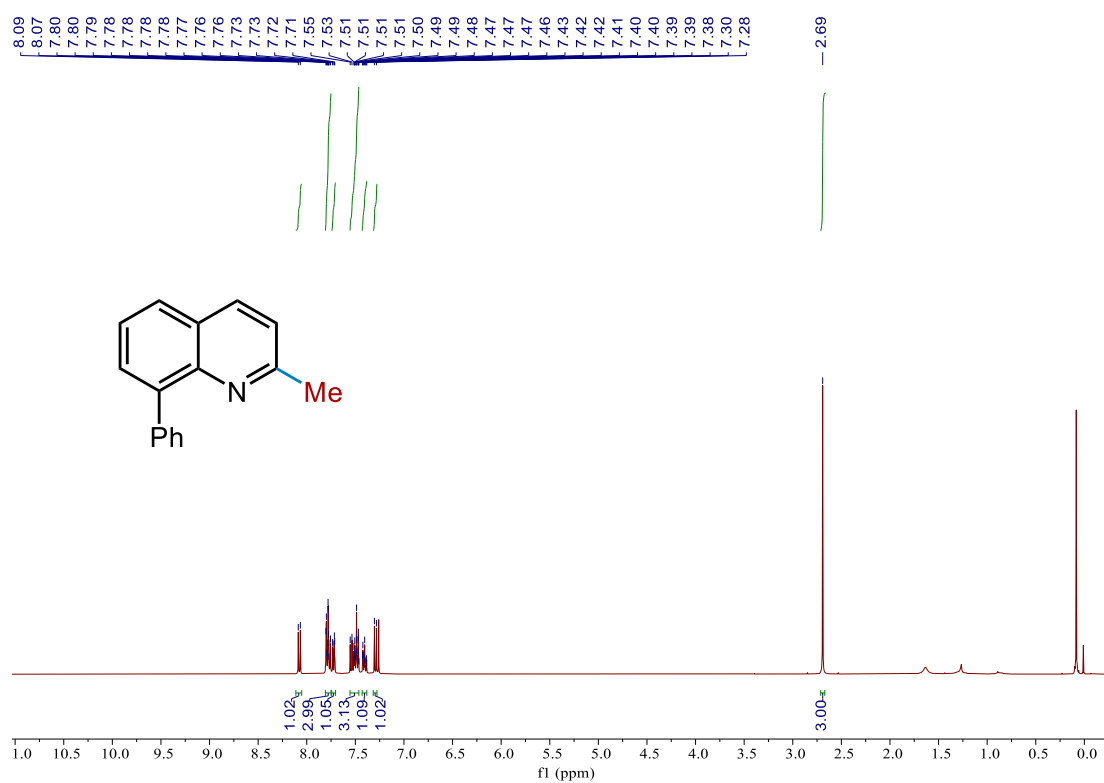

$^{13}\text{C}$  NMR (101 MHz, Chloroform-*d*) of compound **32**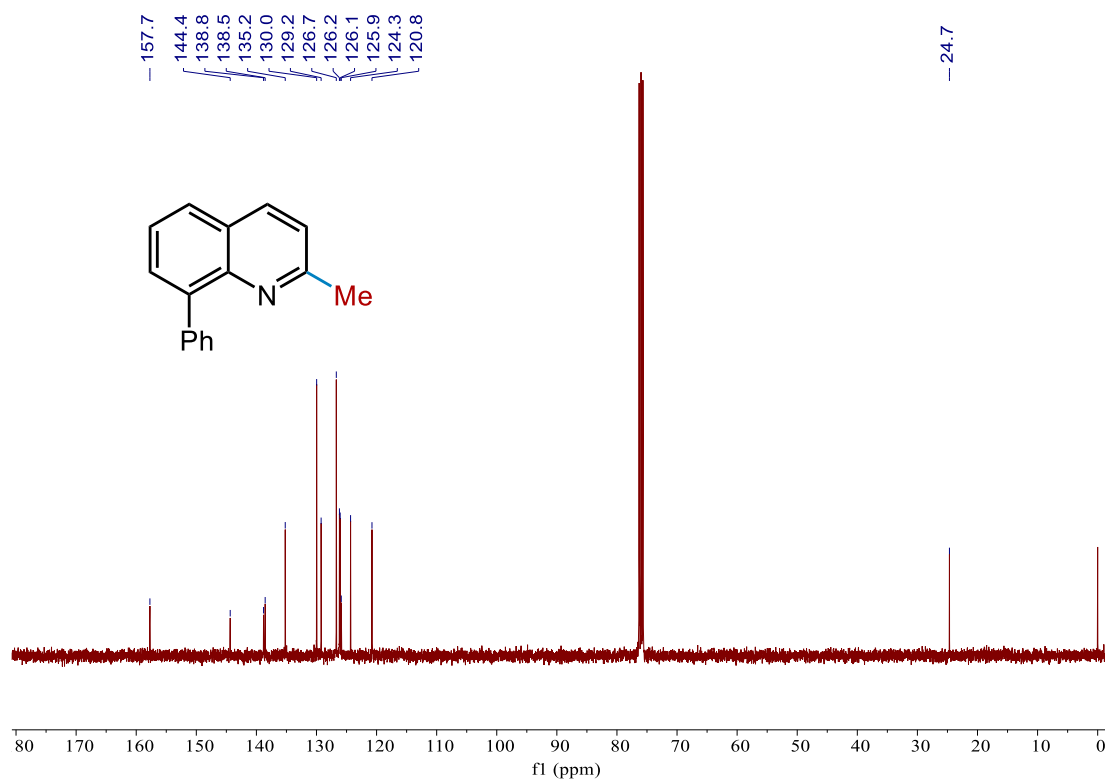 $^1\text{H}$  NMR (400 MHz, Chloroform-*d*) of compound **33**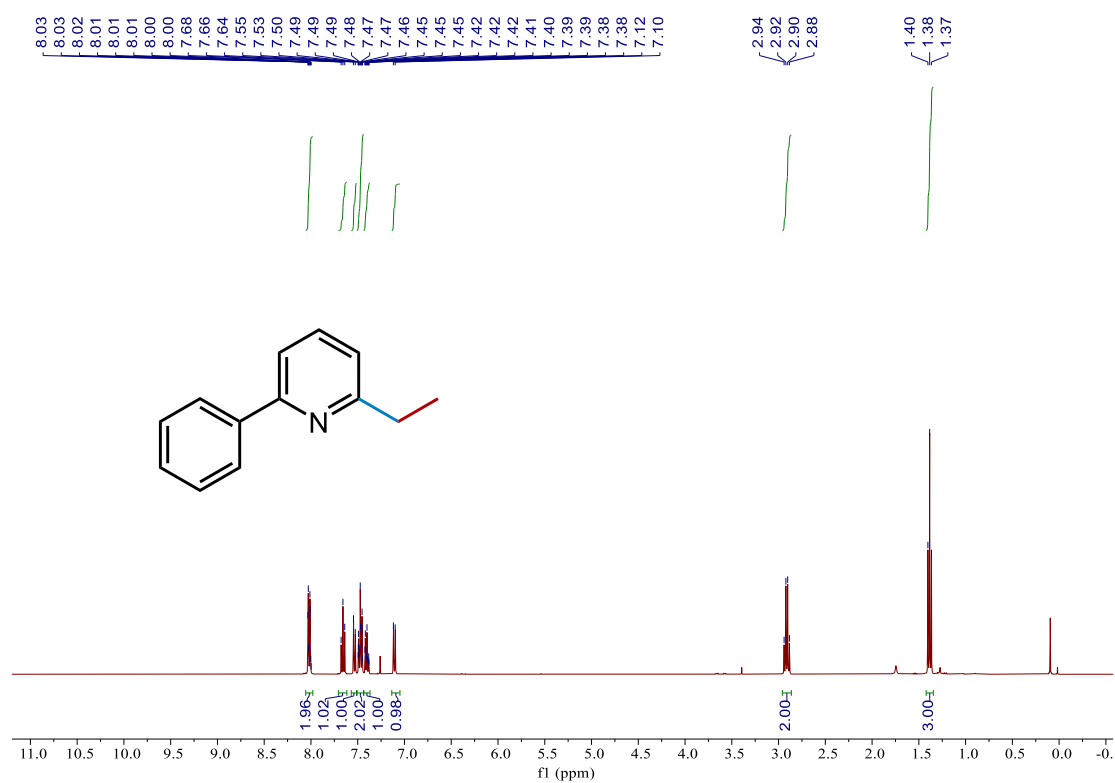

$^1\text{H}$  NMR (400 MHz, Chloroform-*d*) of compound **34**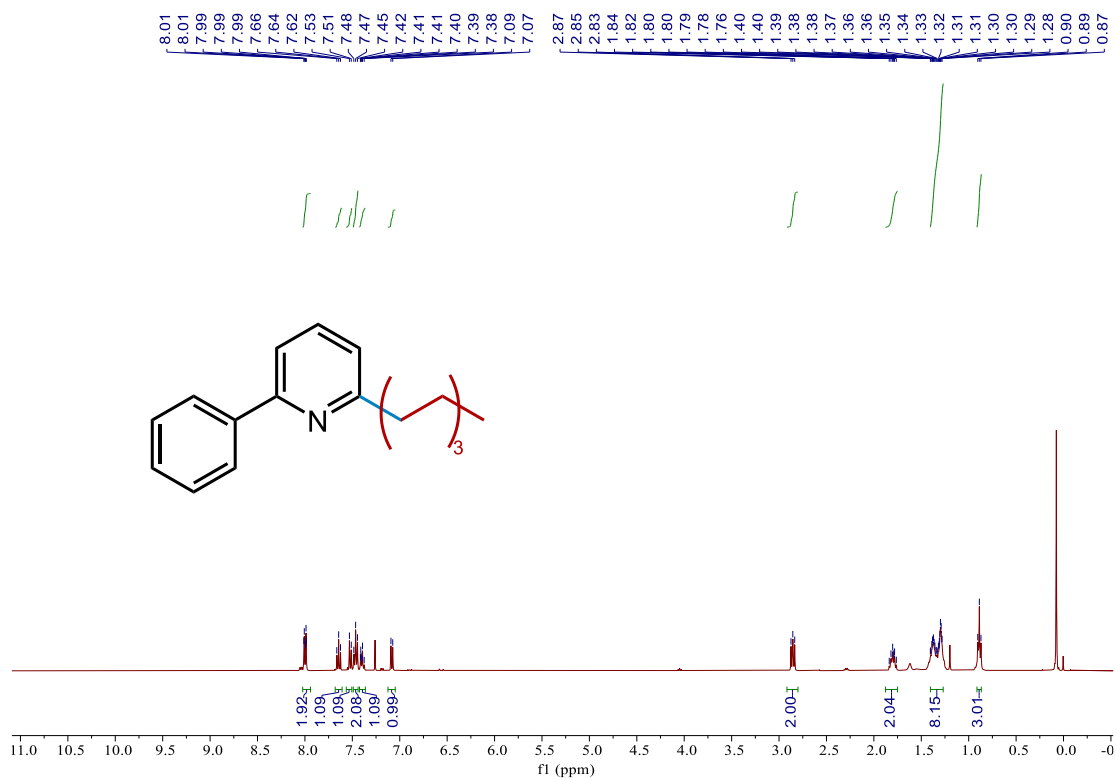 $^{13}\text{C}$  NMR (101 MHz, Chloroform-*d*) of compound **34**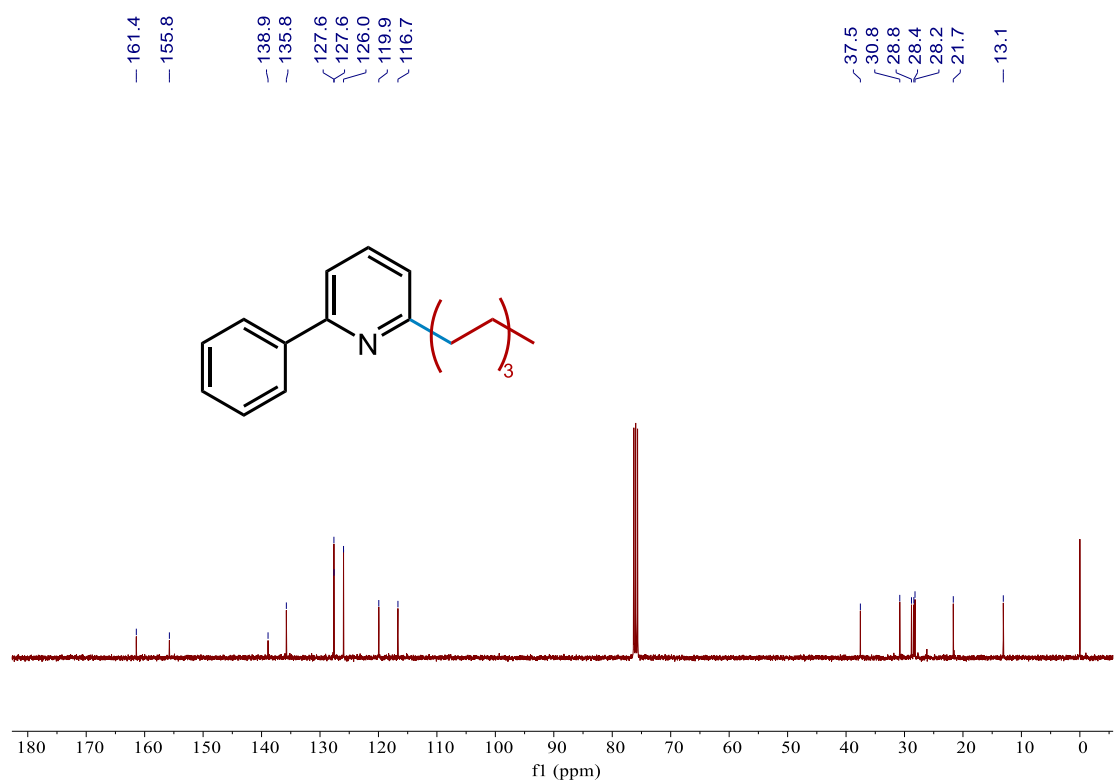

$^1\text{H}$  NMR (400 MHz, Chloroform-*d*) of compound **35**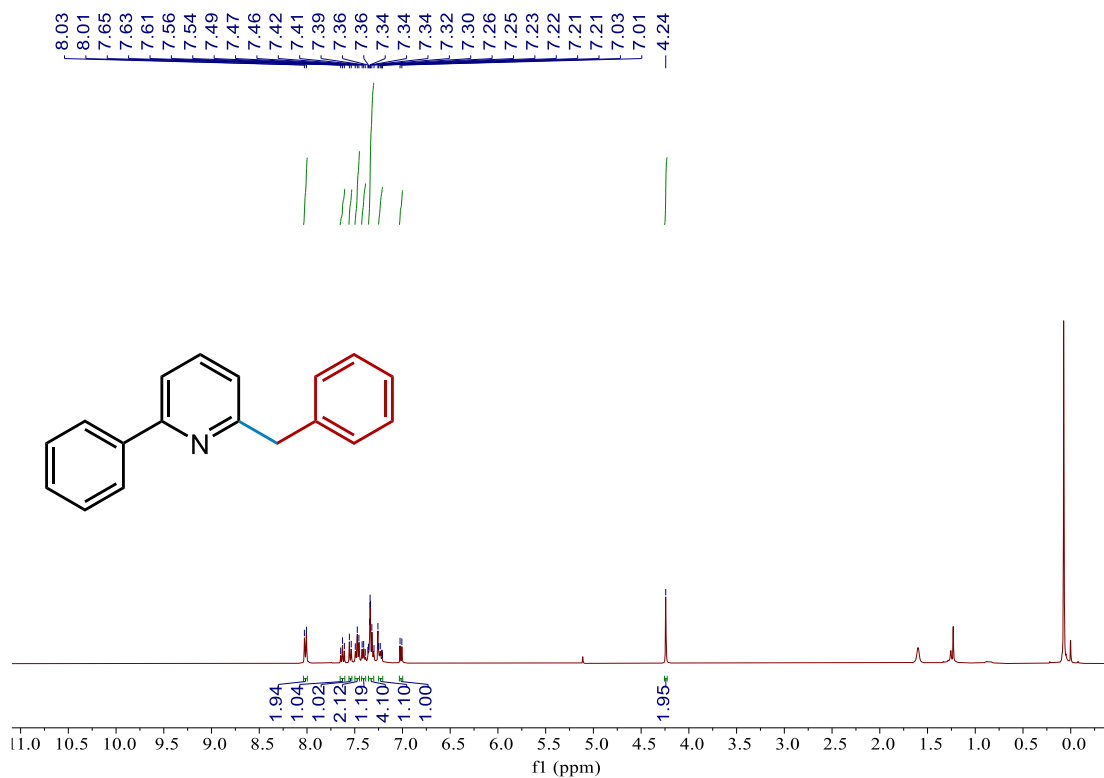 $^1\text{H}$  NMR (400 MHz, Chloroform-*d*) of compound **36**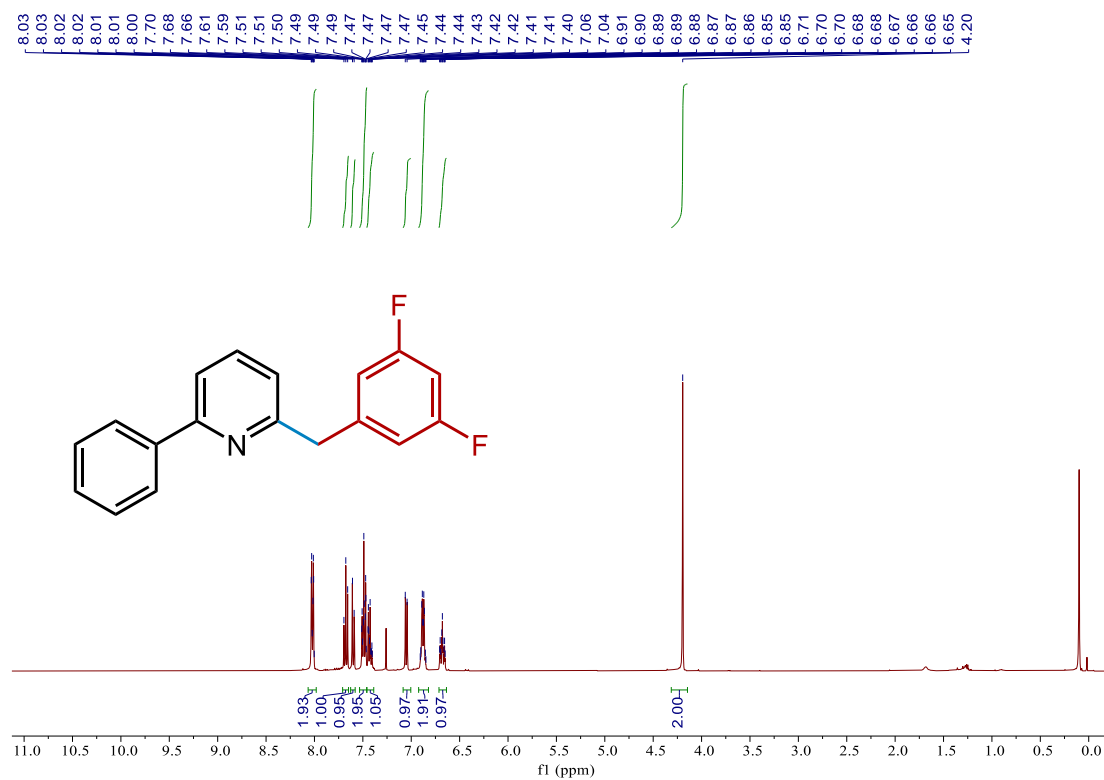

$^{19}\text{F}$  NMR (400 MHz, Chloroform-*d*) of compound **36**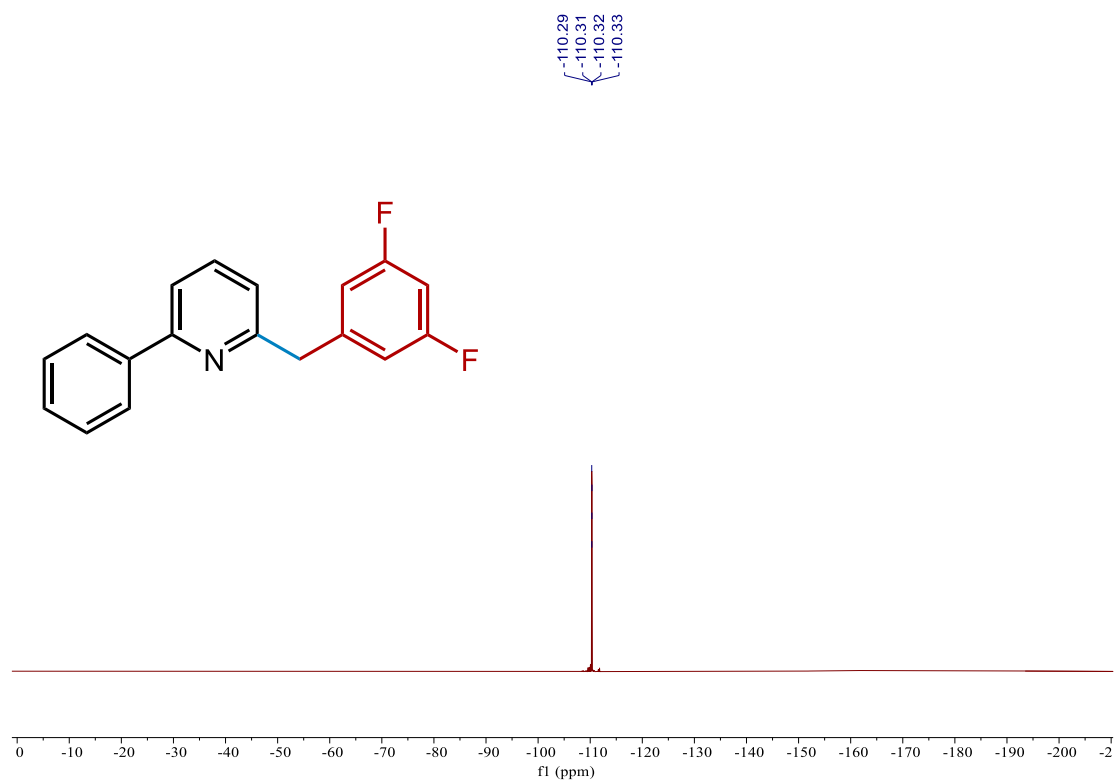 $^{13}\text{C}$  NMR (101 MHz, Chloroform-*d*) of compound **36**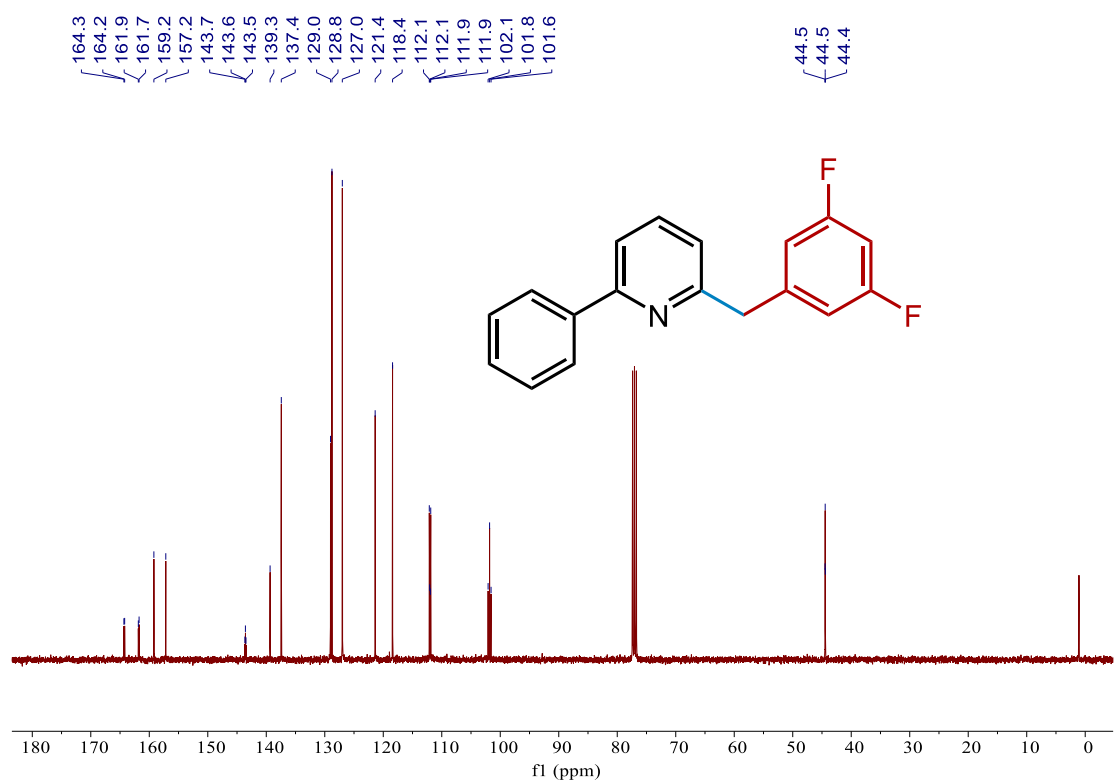

$^1\text{H}$  NMR (400 MHz, Chloroform-*d*) of compound **37**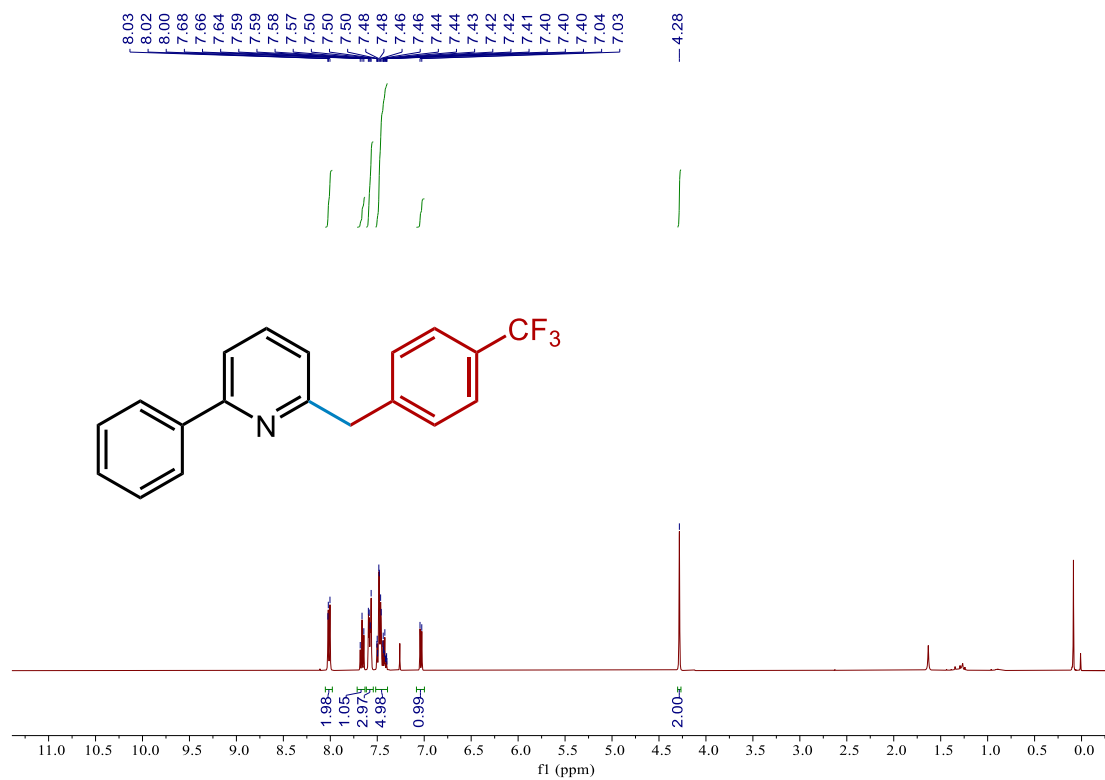 $^{19}\text{F}$  NMR (400 MHz, Chloroform-*d*) of compound **37**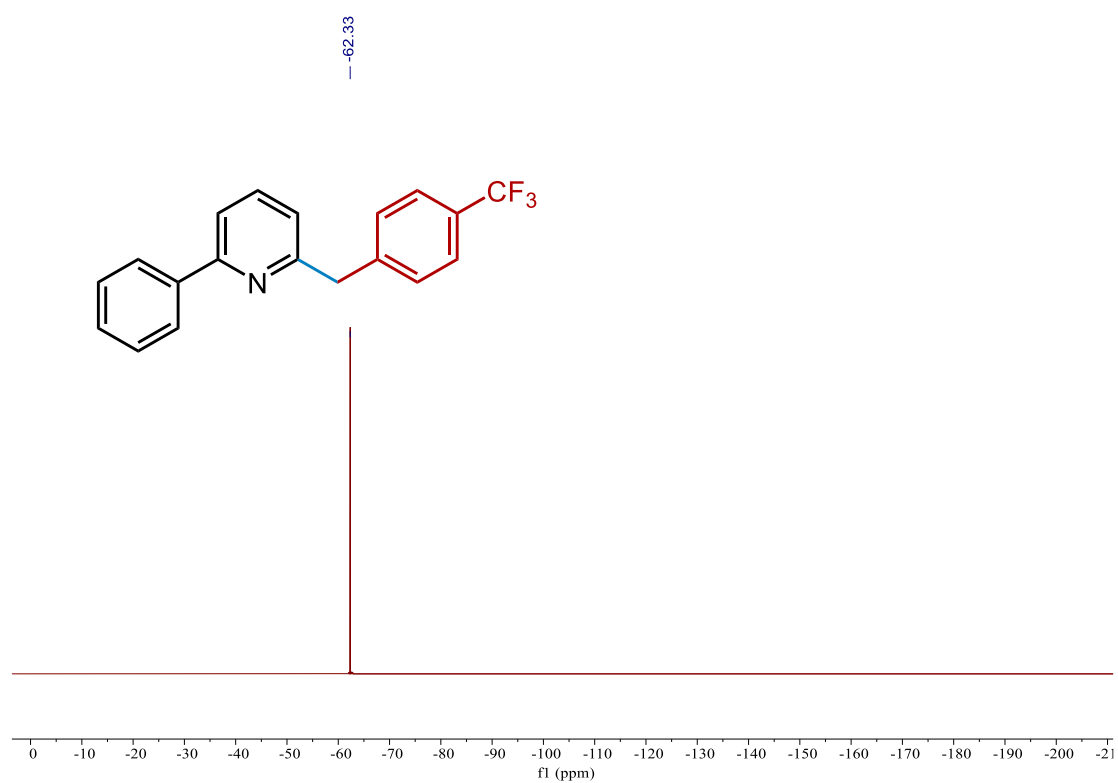

$^{13}\text{C}$  NMR (101 MHz, Chloroform-*d*) of compound **37**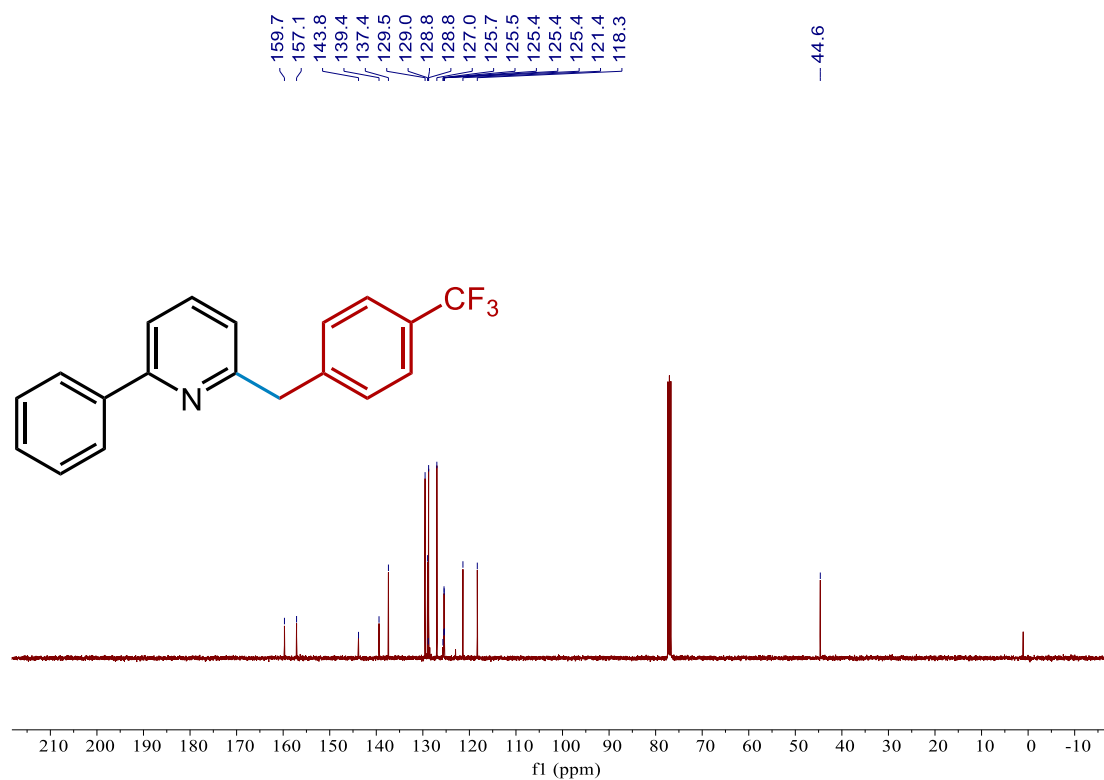 $^1\text{H}$  NMR (400 MHz, Chloroform-*d*) of compound **38**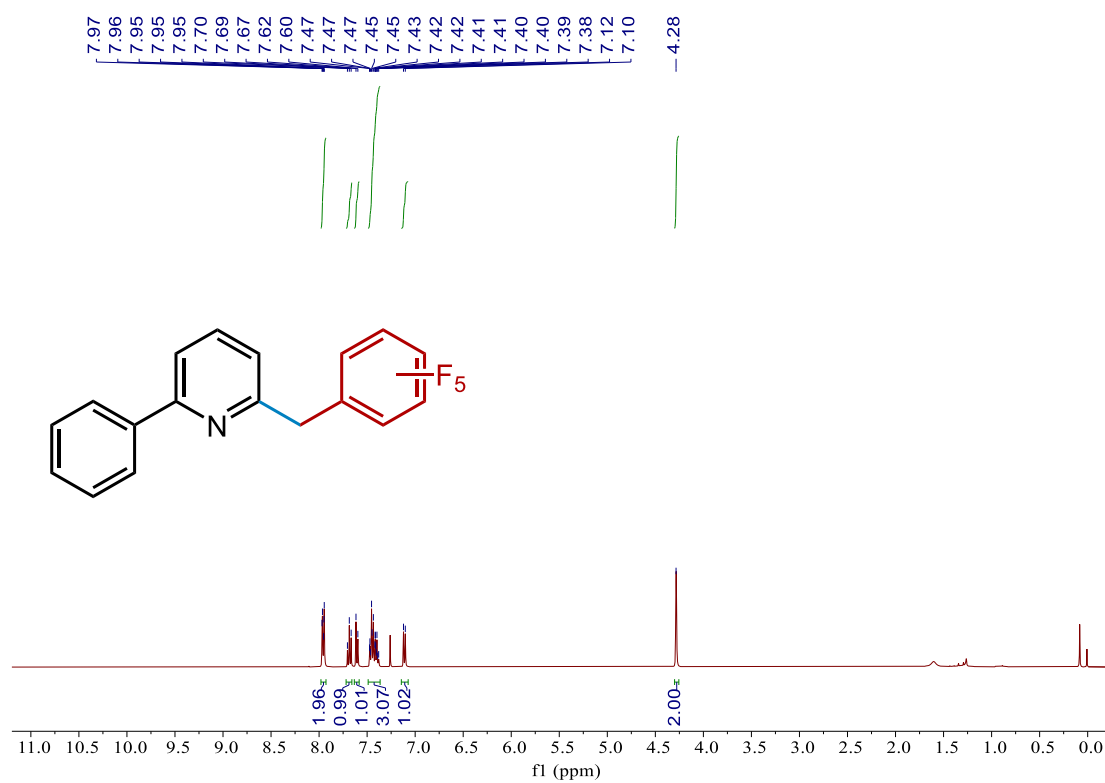

$^{19}\text{F}$  NMR (400 MHz, Chloroform-*d*) of compound **38**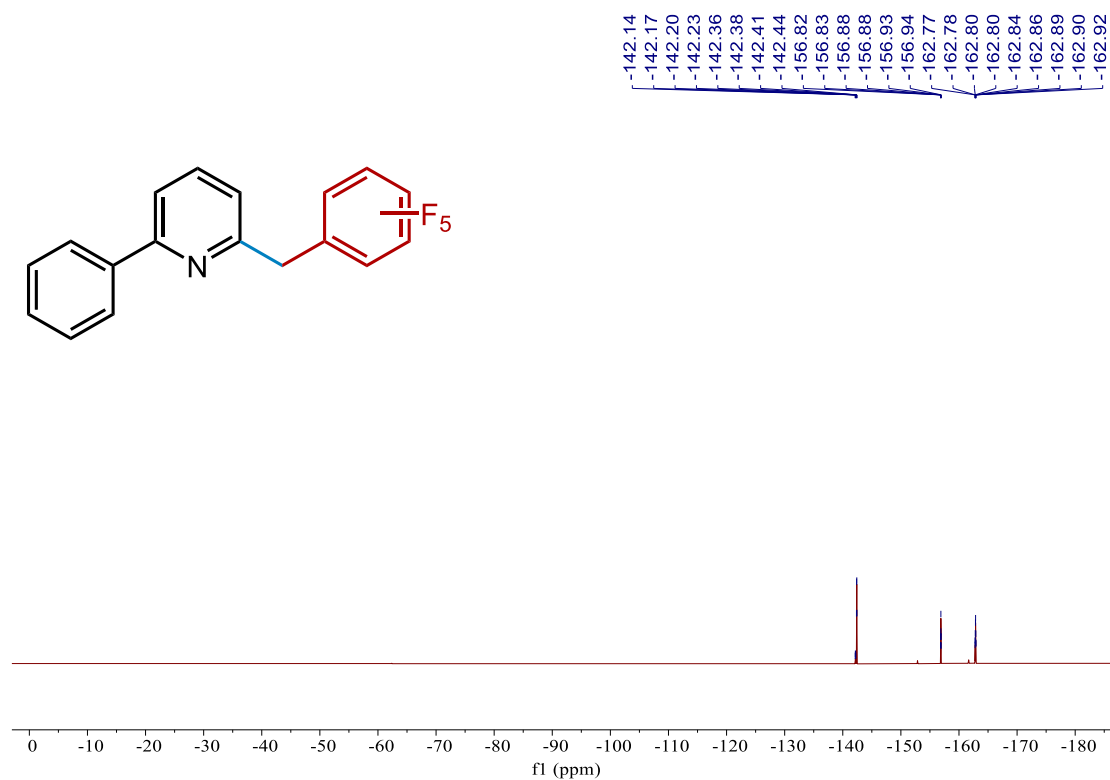 $^{13}\text{C}$  NMR (101 MHz, Chloroform-*d*) of compound **38**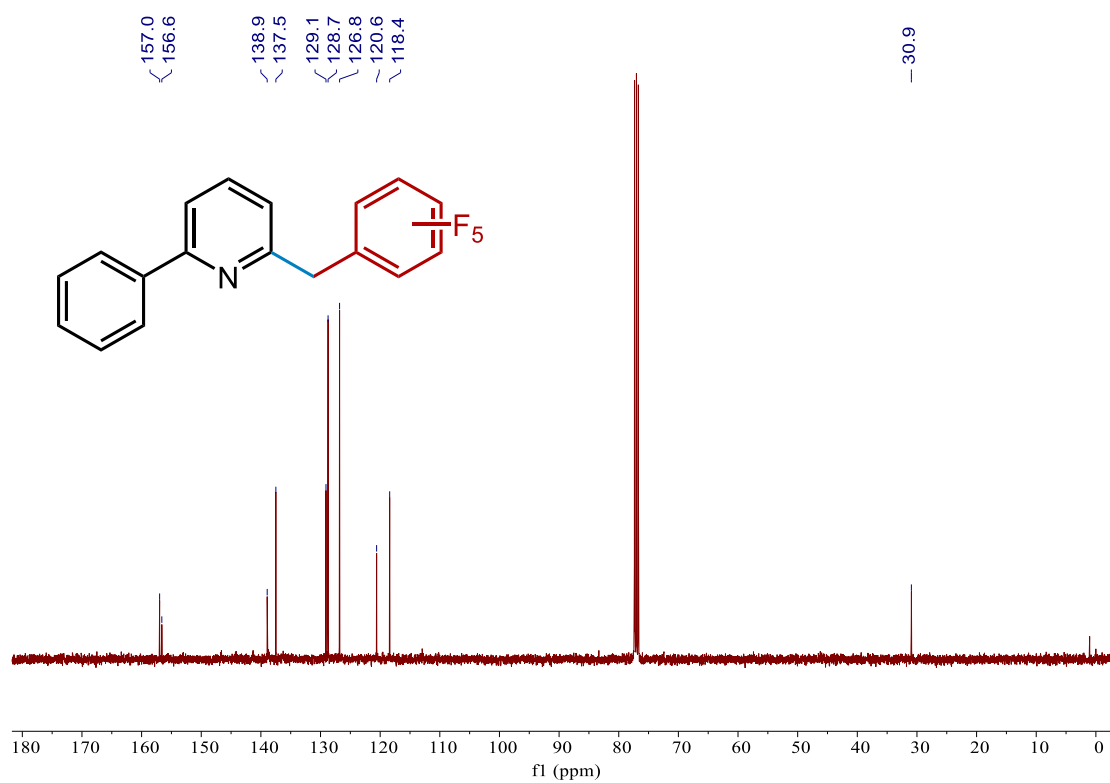

$^1\text{H}$  NMR (400 MHz, Chloroform-*d*) of compound **39**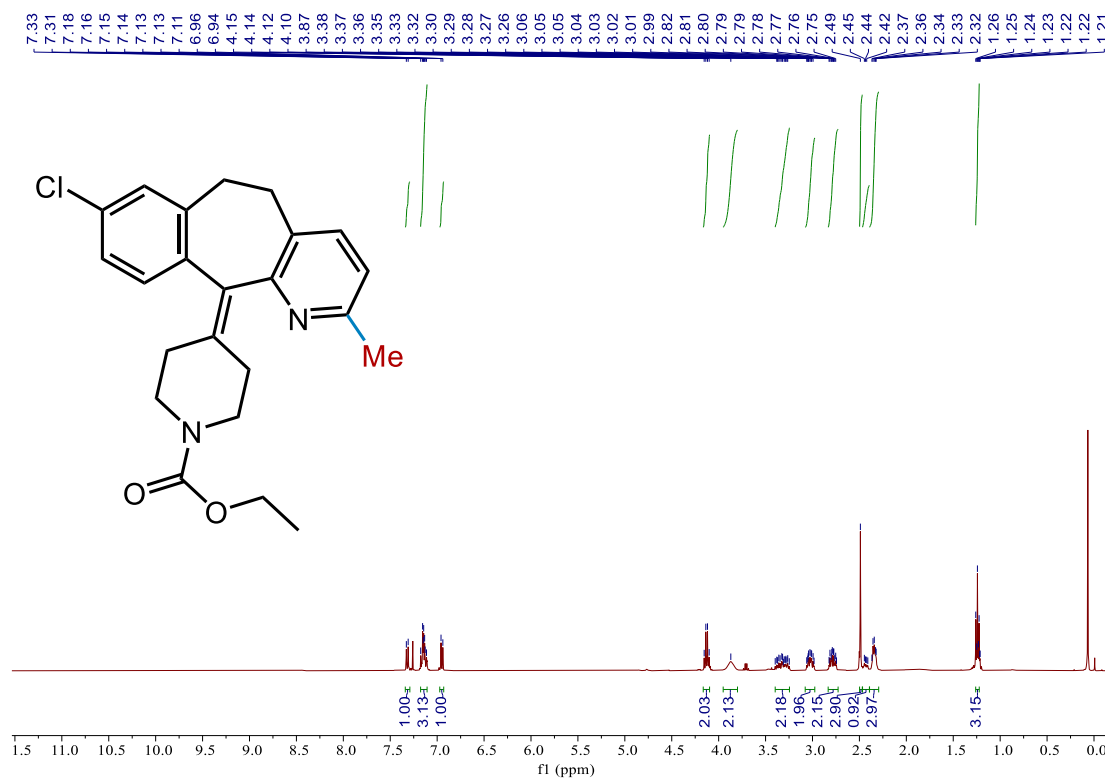 $^{13}\text{C}$  NMR (101 MHz, Chloroform-*d*) of compound **39**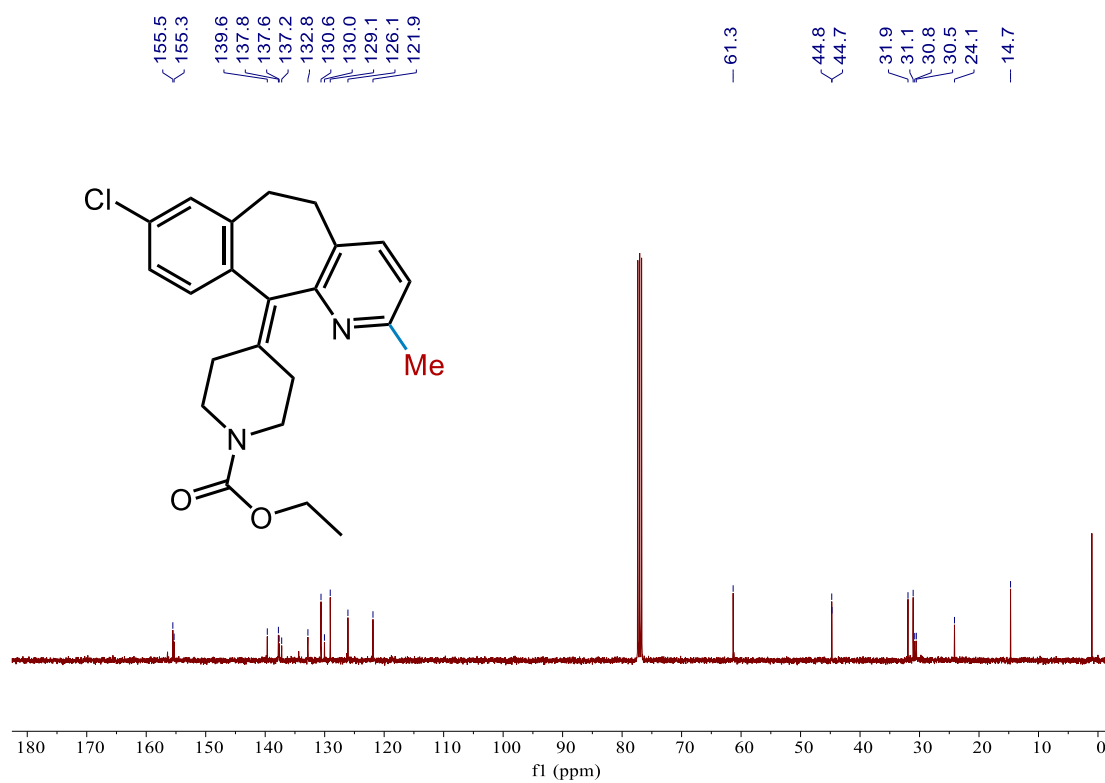

$^1\text{H}$  NMR (400 MHz, Chloroform-*d*) of compound **40**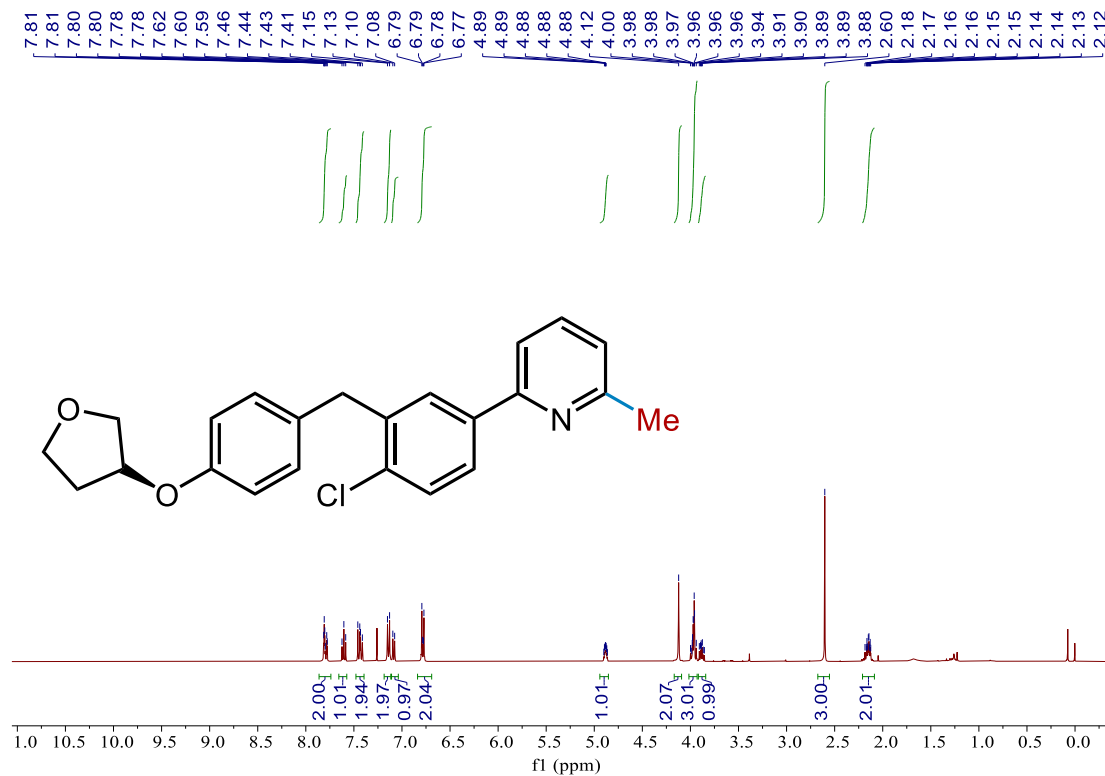 $^{13}\text{C}$  NMR (101 MHz, Chloroform-*d*) of compound **40**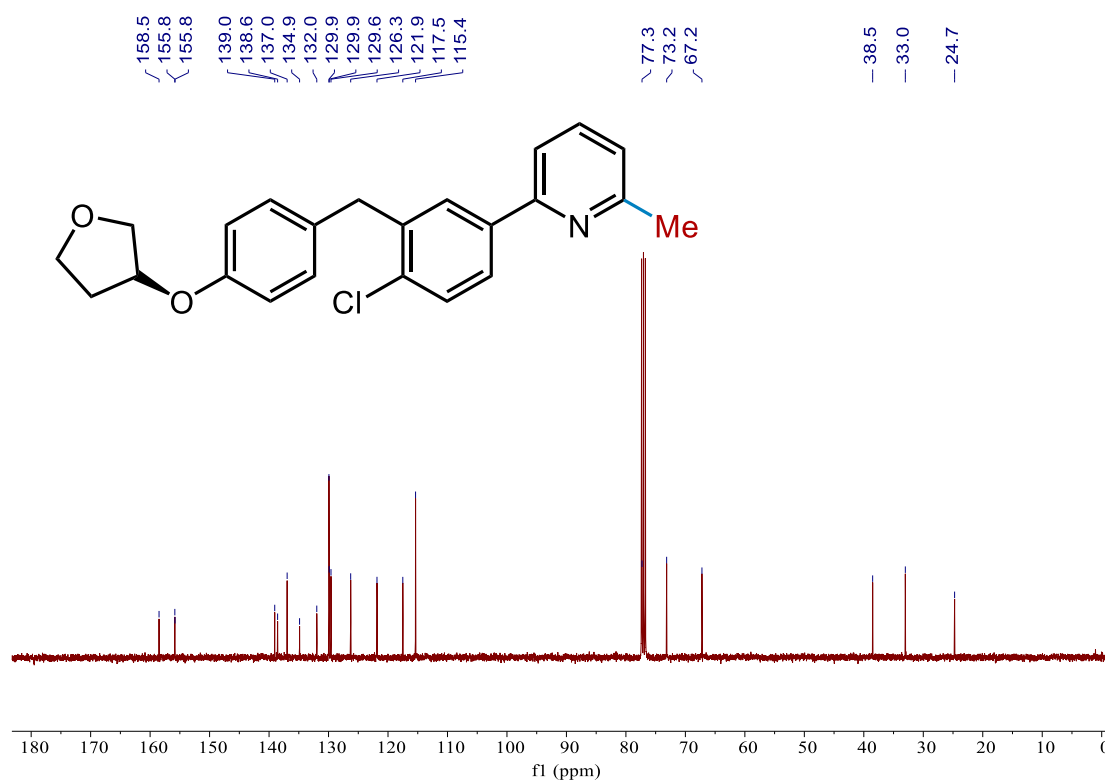

$^1\text{H}$  NMR (400 MHz, Chloroform-*d*) of compound **41**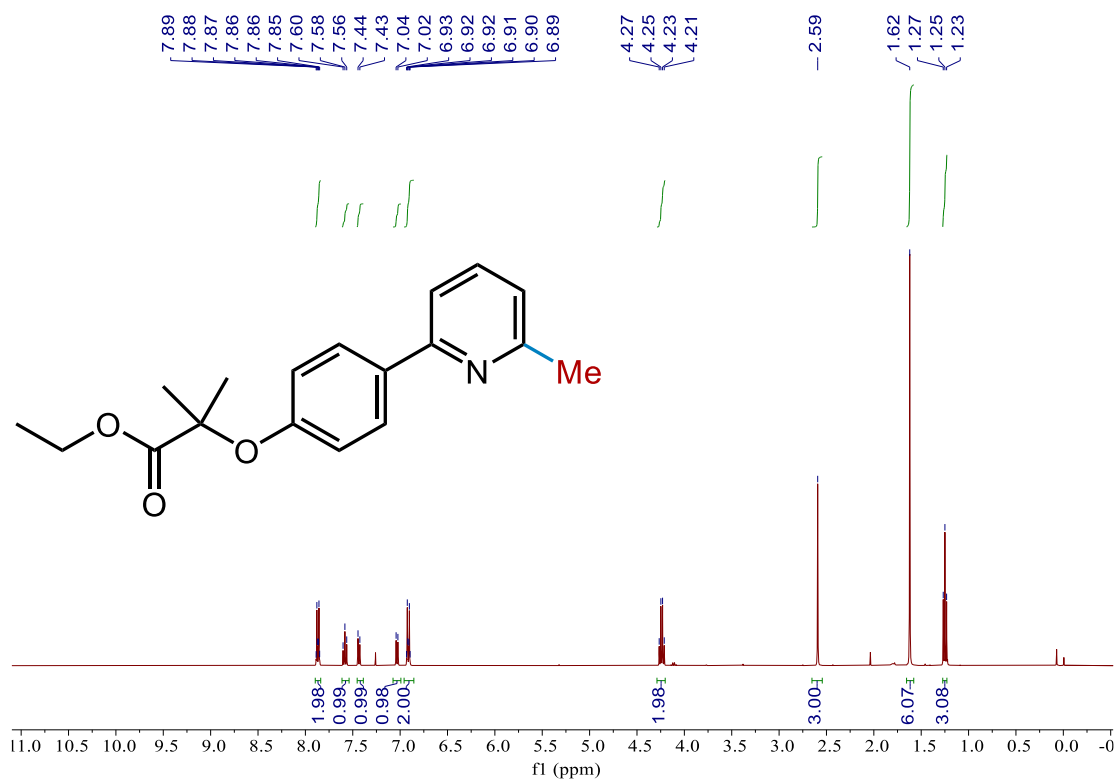 $^{13}\text{C}$  NMR (101 MHz, Chloroform-*d*) of compound **41**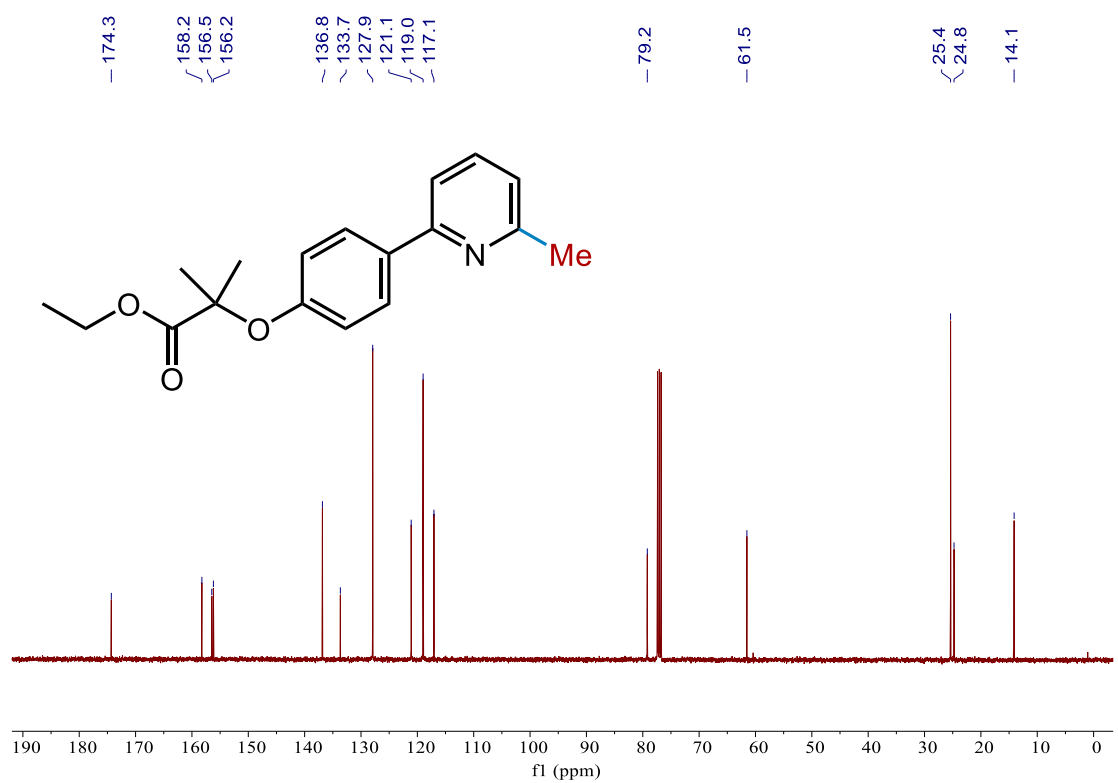

$^1\text{H}$  NMR (400 MHz, Chloroform-*d*) of compound **42**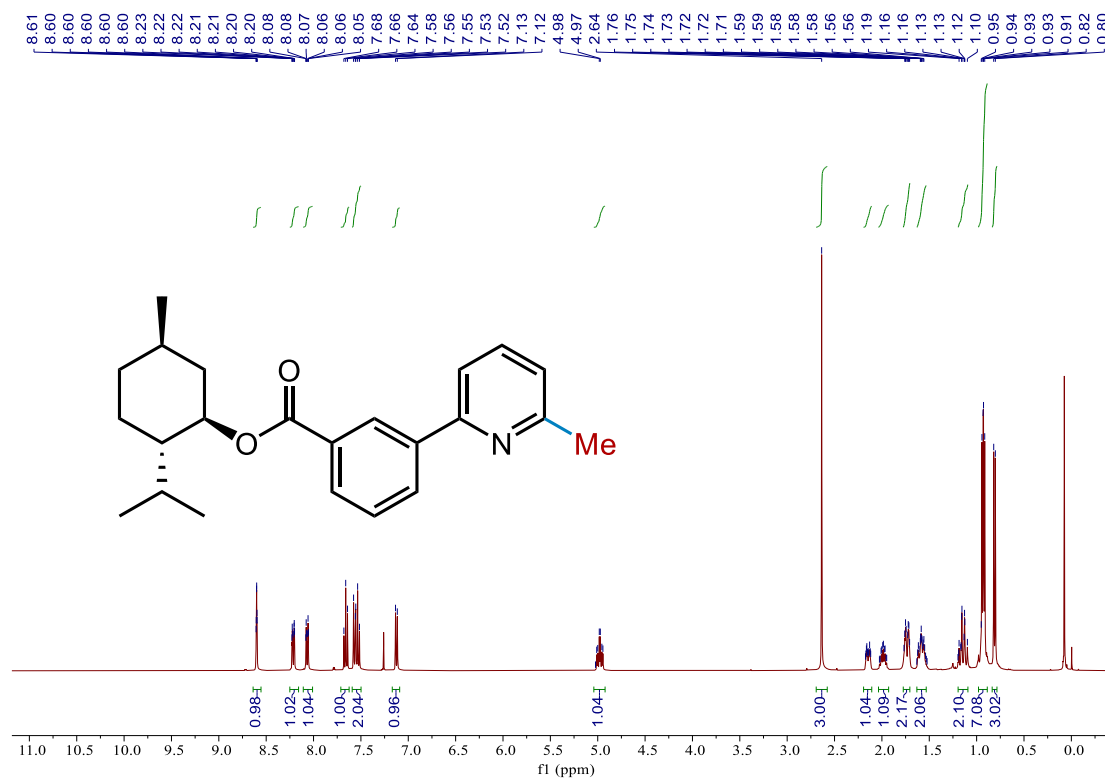 $^{13}\text{C}$  NMR (101 MHz, Chloroform-*d*) of compound **42**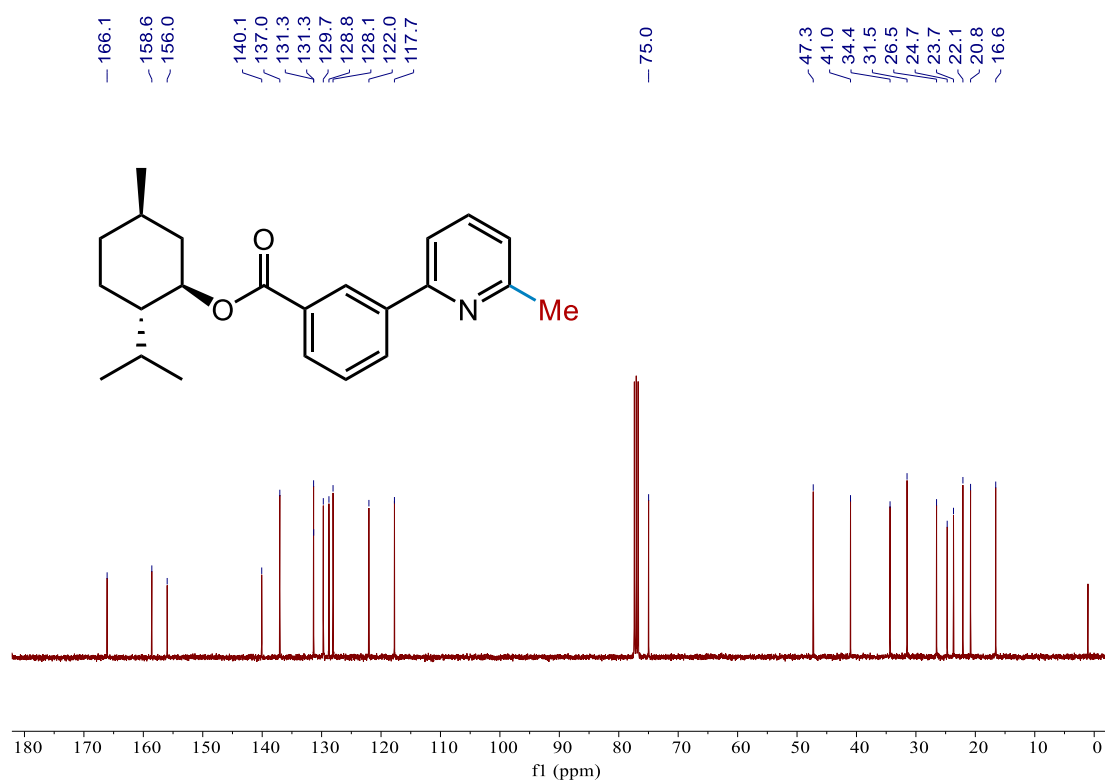

$^1\text{H}$  NMR (400 MHz, Chloroform-*d*) of compound **43**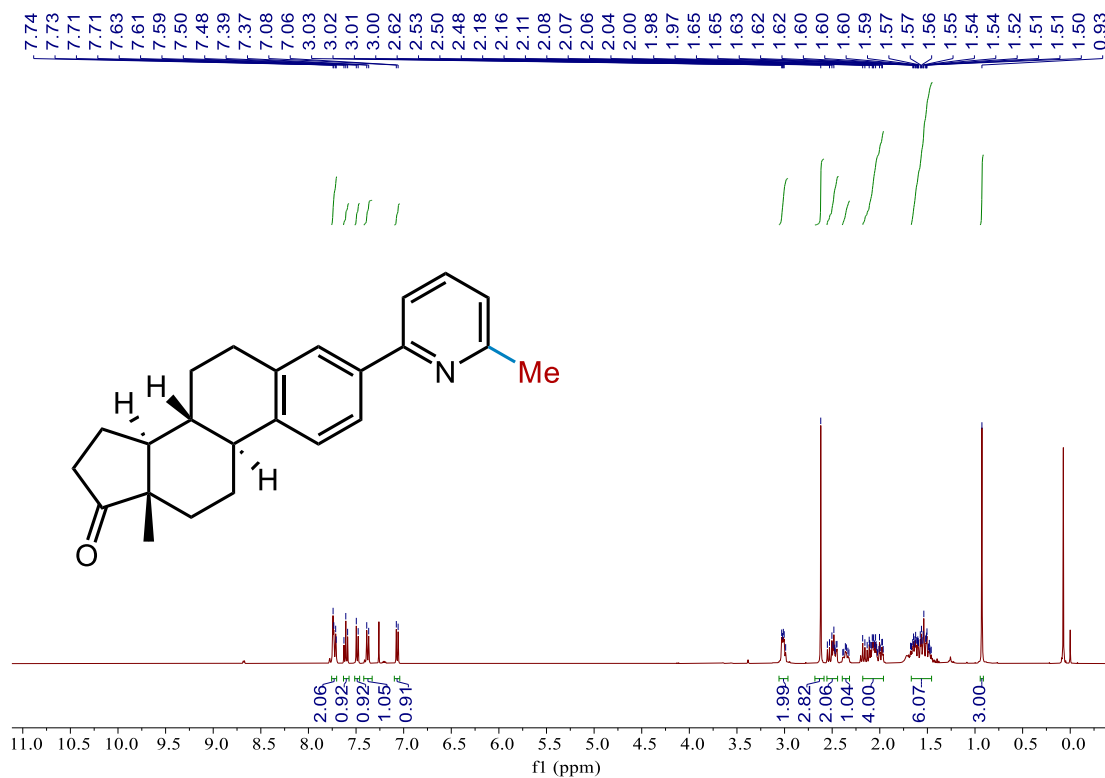 $^{13}\text{C}$  NMR (101 MHz, Chloroform-*d*) of compound **43**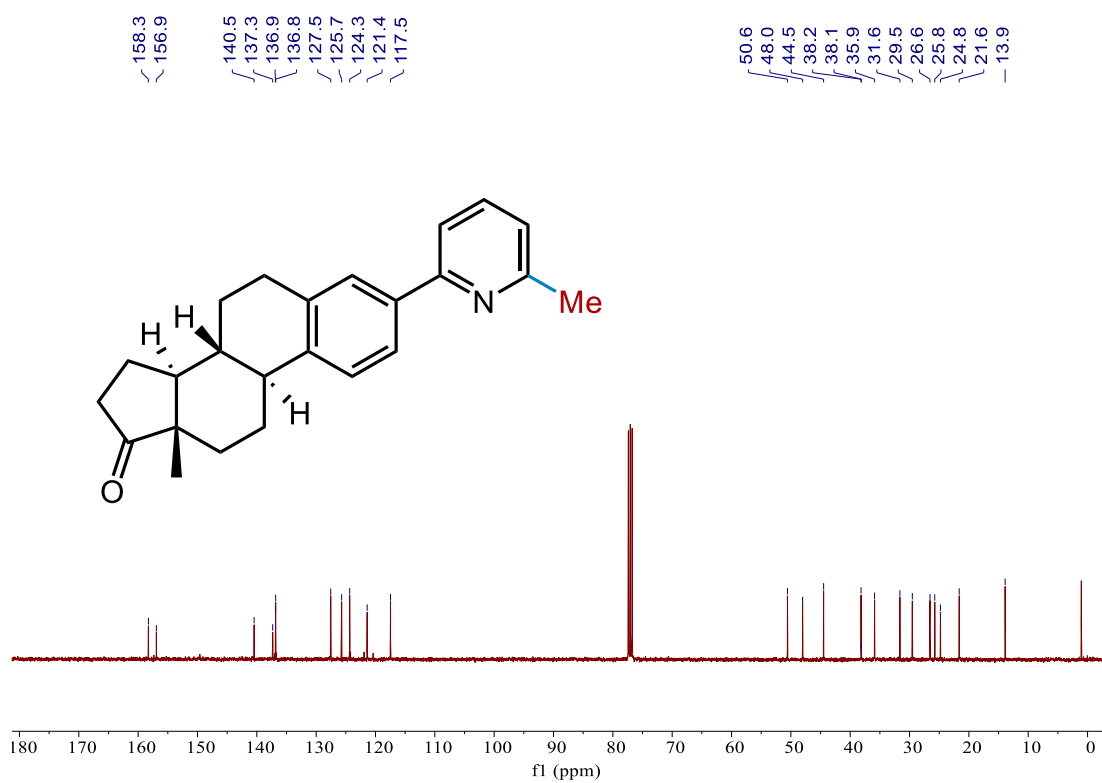

$^1\text{H}$  NMR (400 MHz, Methanol- $d_4$ ) of compound **44**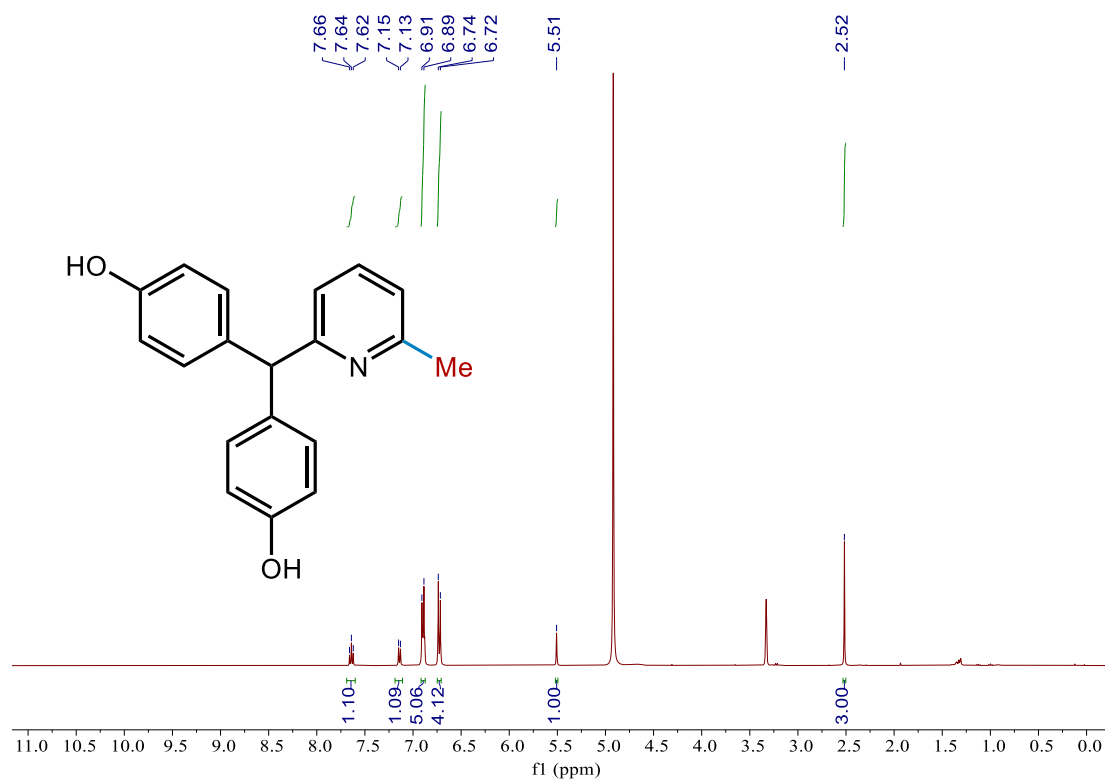 $^{13}\text{C}$  NMR (101 MHz, Methanol- $d_4$ ) of compound **44**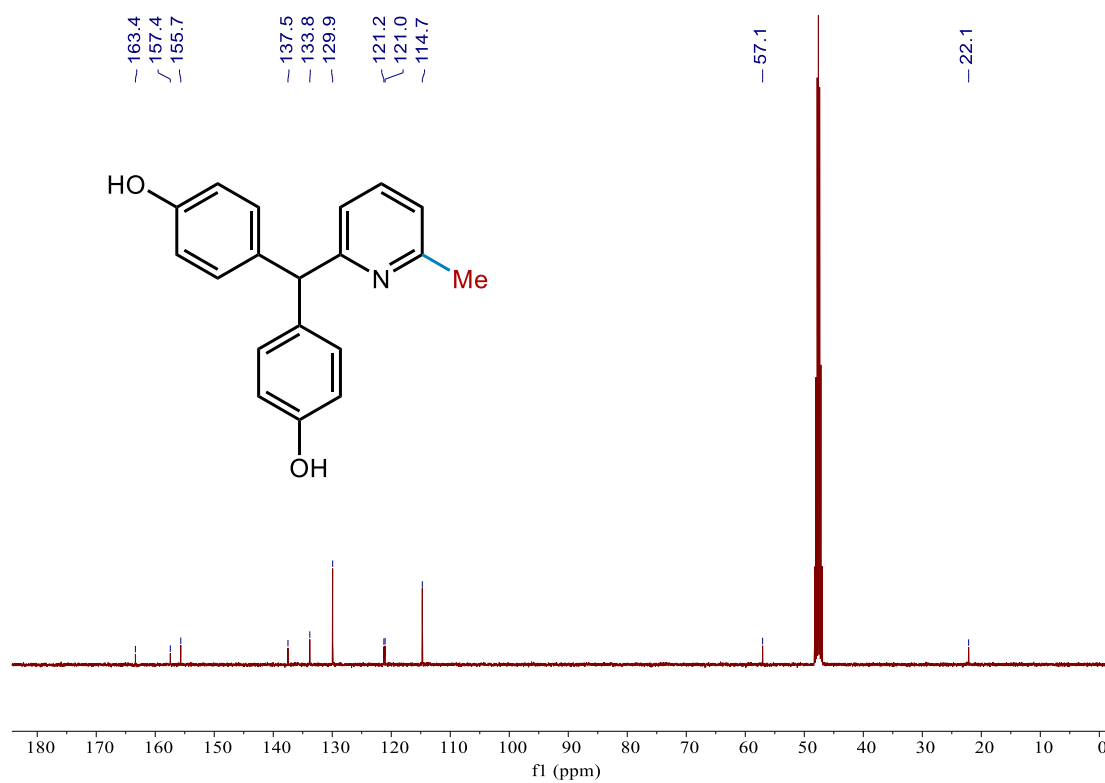

Supplement: d5sc10082h1.pdf [file d5sc10082h1.pdf]
